# Supplementary material for: A Million-Cow Validation of a Chromosome 14 Region Interacting with All Chromosomes for Fat Percentage in U.S. Holstein Cows
Source: MDPI journal article supplement (doi:10.3390/ijms25010674), 2024-01-04

**Table S1.** Significant inter-chromosome A×A effects with  $\log_{10}(1/p) > 32$ . (Excel file)

(AC1-AC4 are the four allelic combinations of the two loci. aa1-aa4 are the A×A epistasis values of AC1-AC4. frq1-frq4 are the frequencies of AC1-AC4.)

**Table S2.** Basic statistics of AFC phenotypic residuals after removing fixed nongenetic effects from the 12/2022 U.S. Holstein genetic evaluation.

| Trait | Number of cows | Mean (%) | Min (%) | Max (%) | SD (%) |
|-------|----------------|----------|---------|---------|--------|
| FPC   | 1,231,898      | -0.042   | -1.712  | 4.938   | 0.179  |

**Figure S1.** Circular plots of A×A effects between Chr14 and other chromosomes, and Manhattan plots of the statistical significance of A×A effects of all non-Chr14 chromosomes.

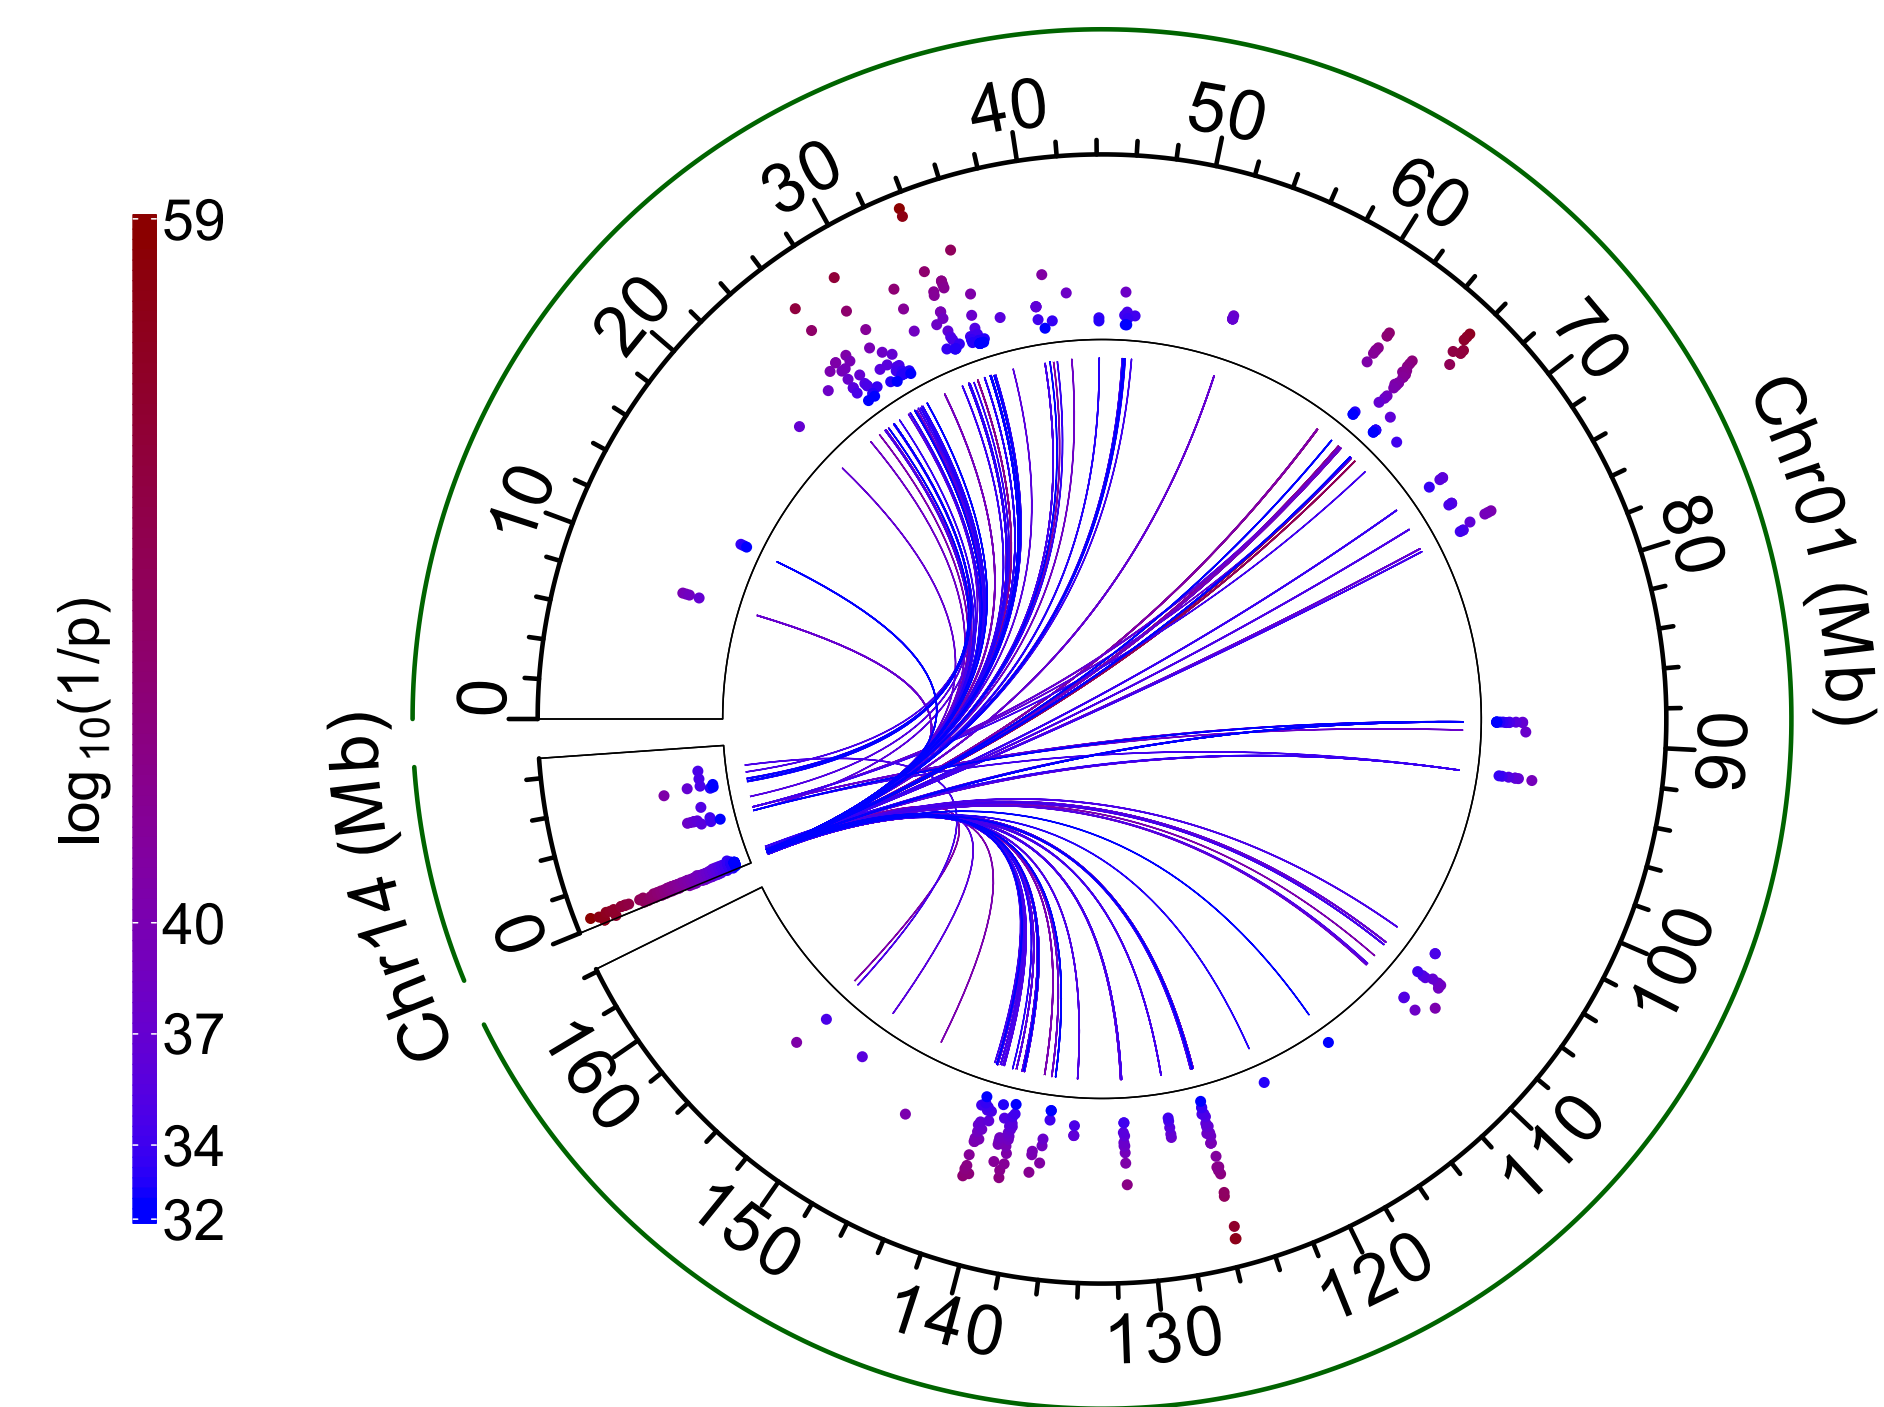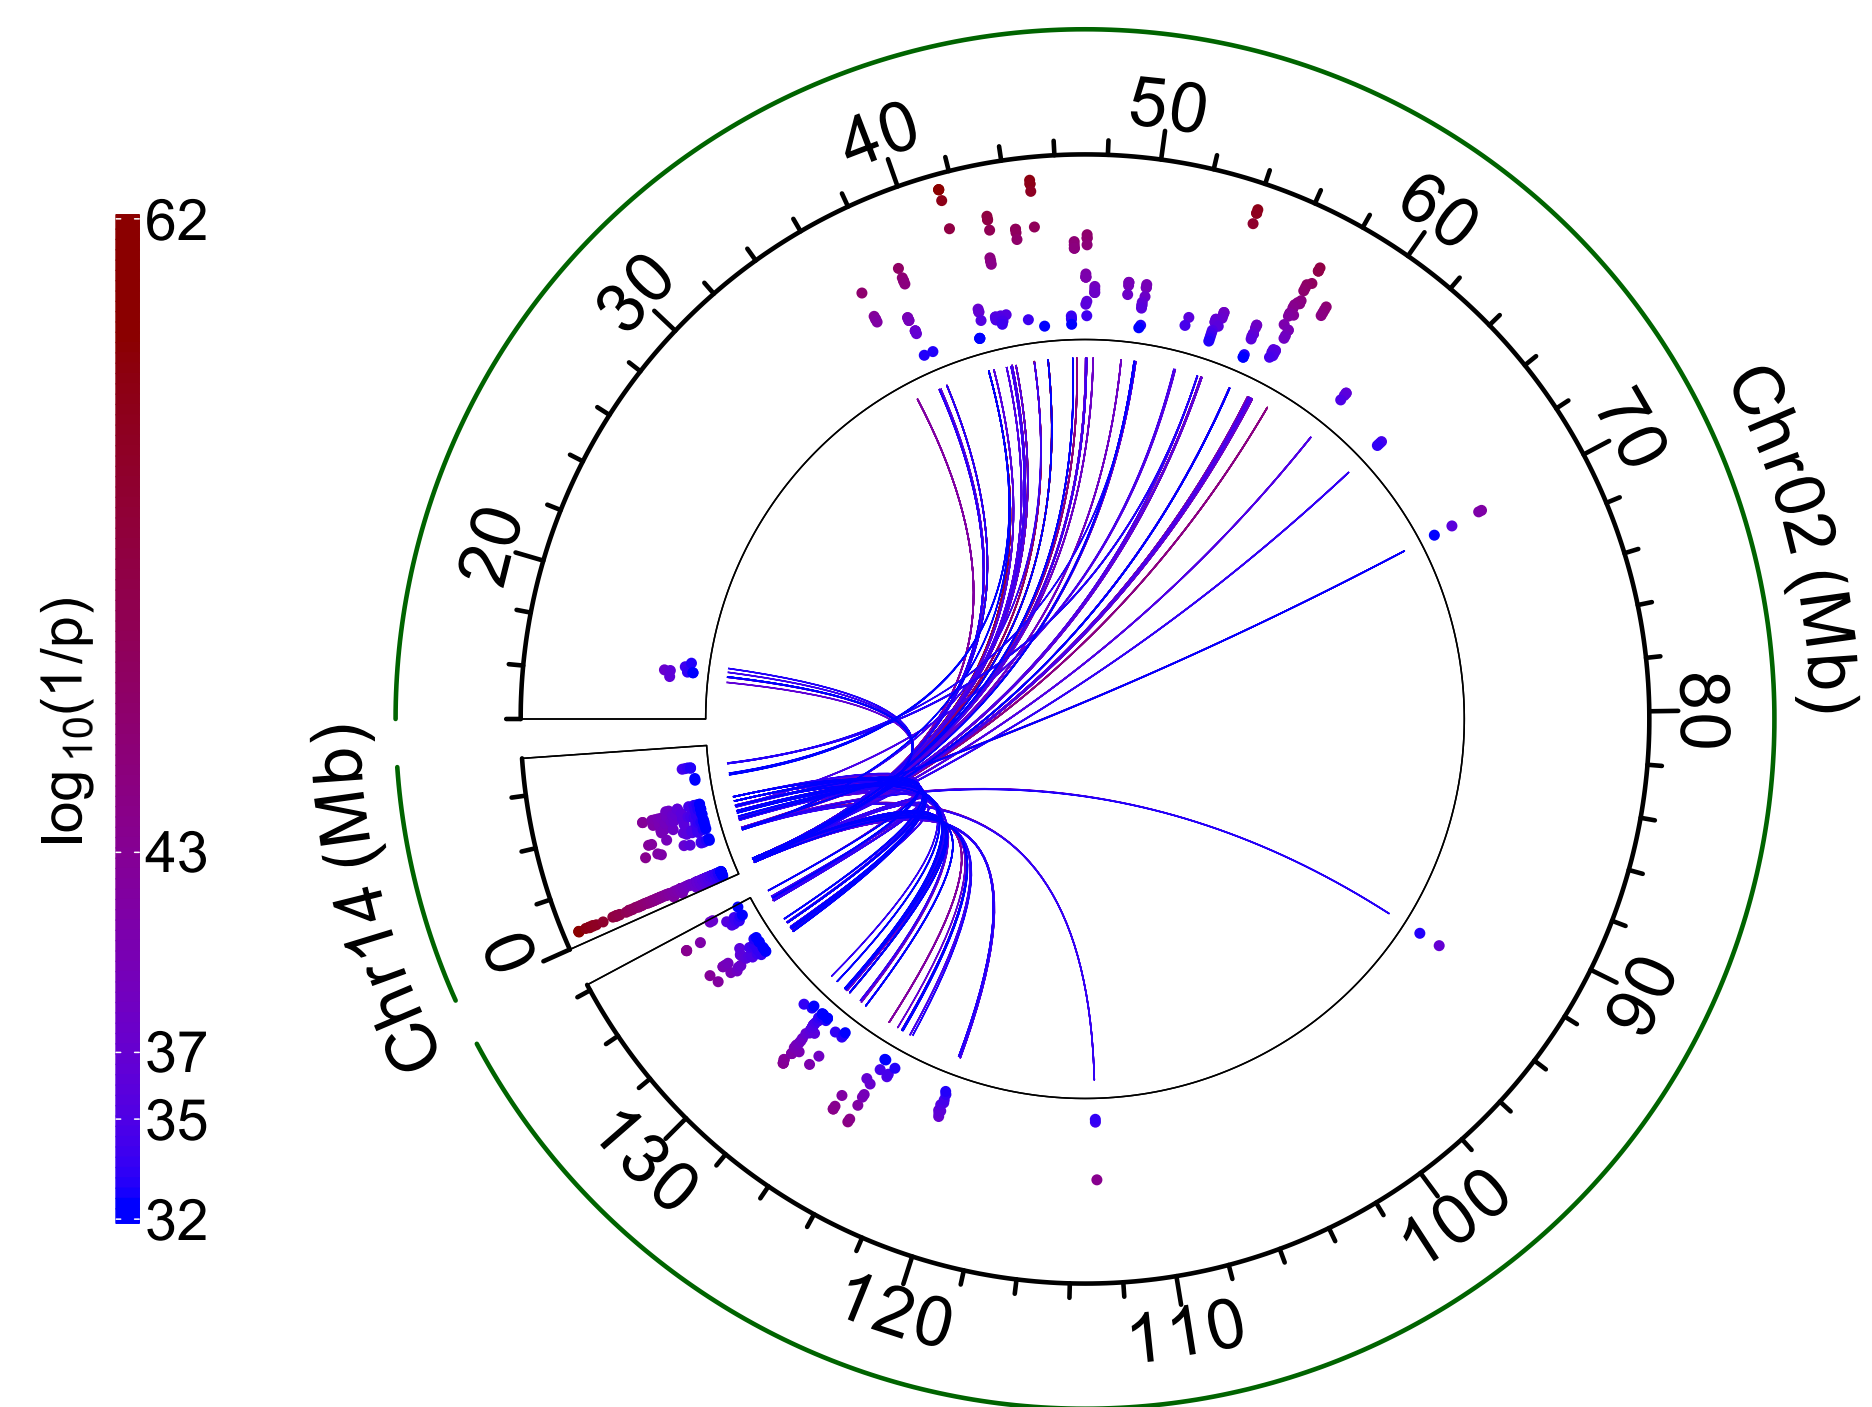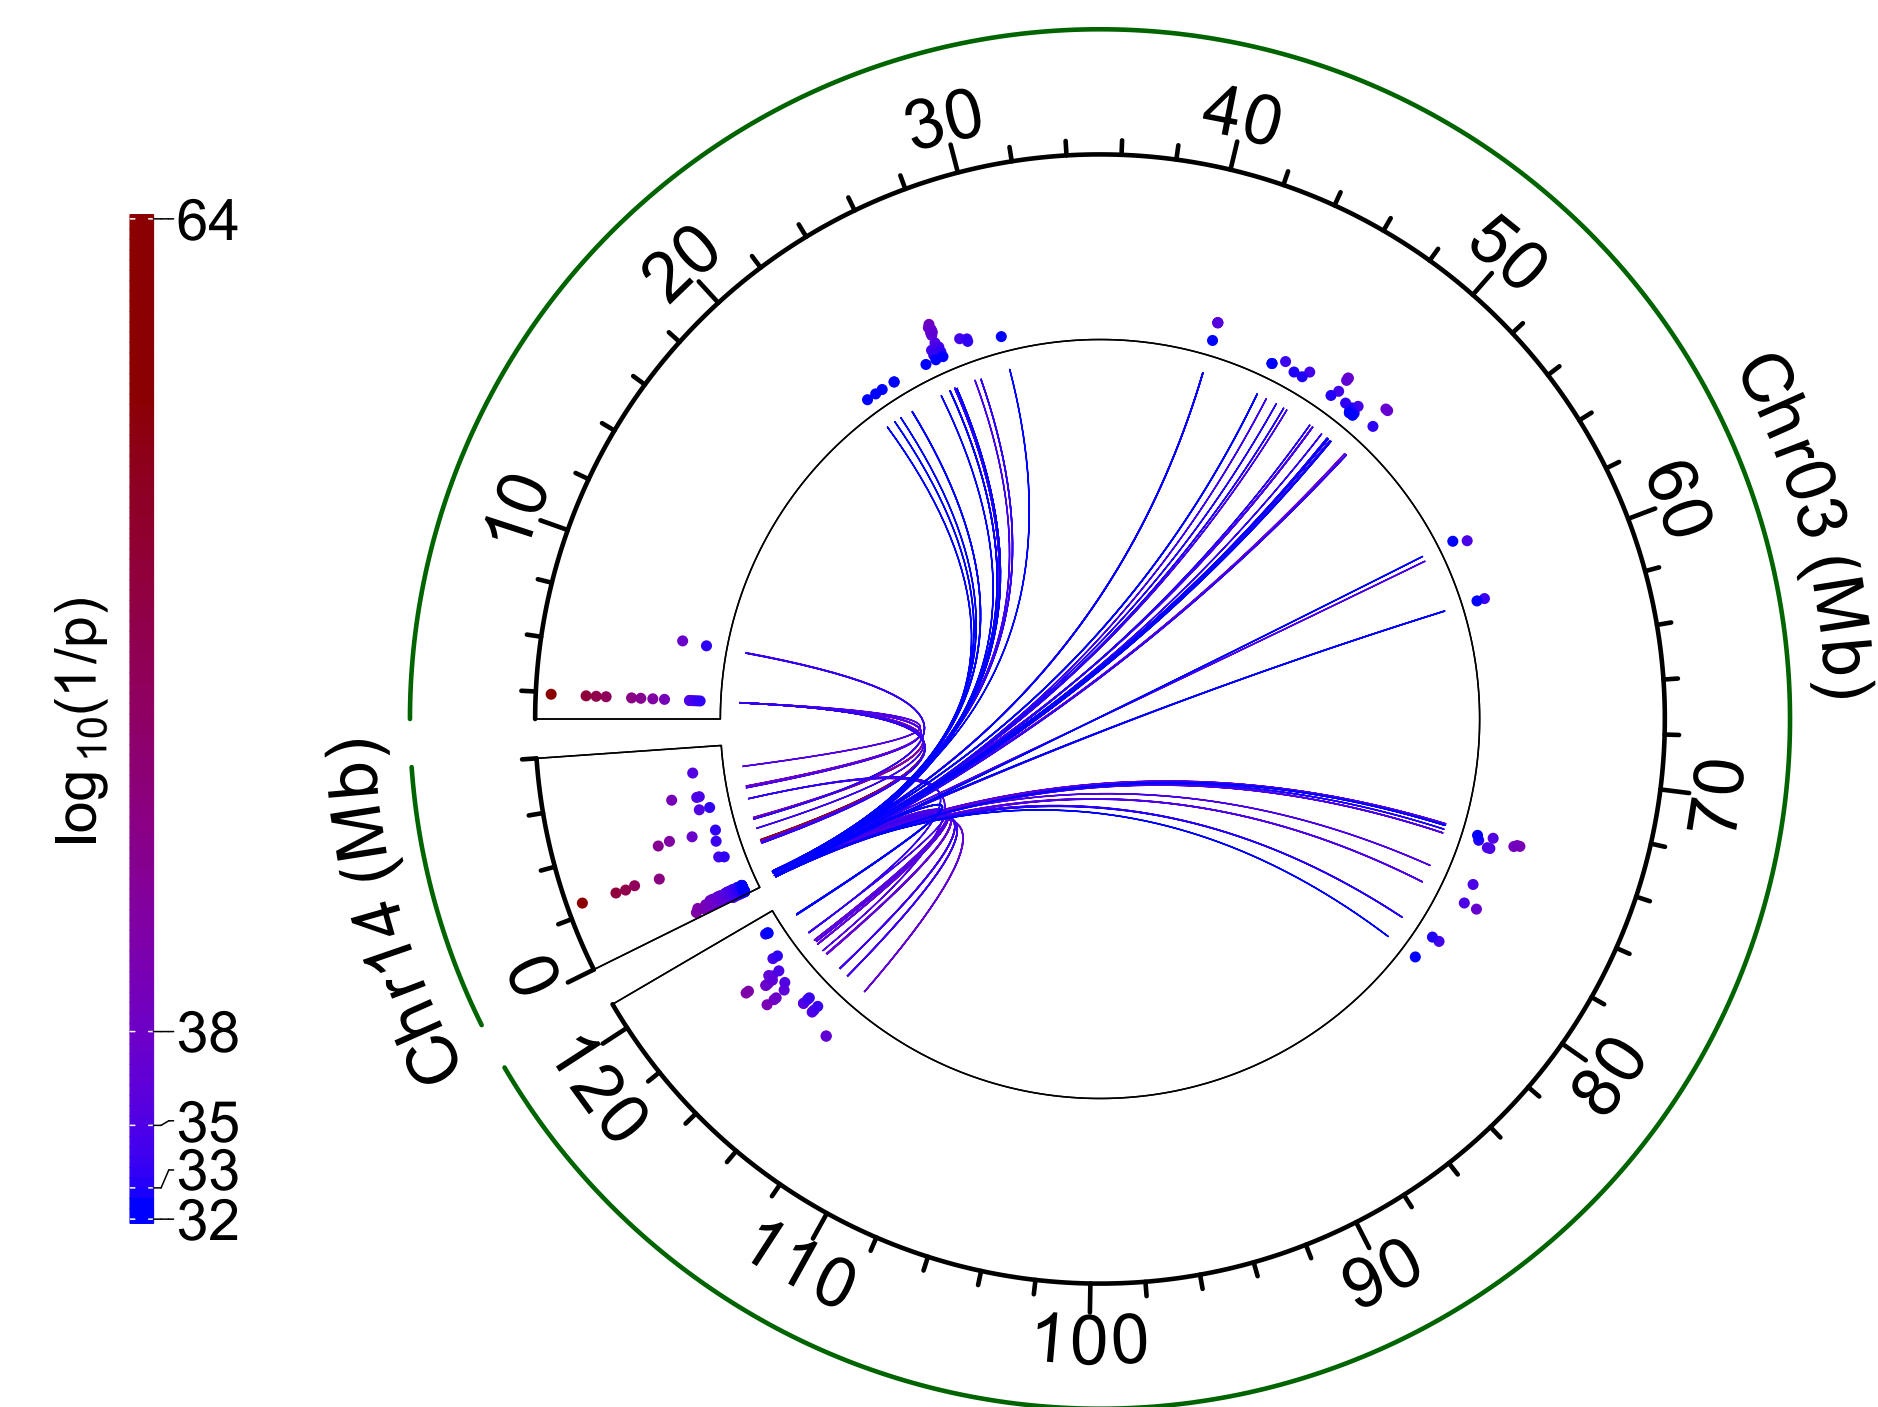

× AxA effect

× AxA effect

× AxA effect

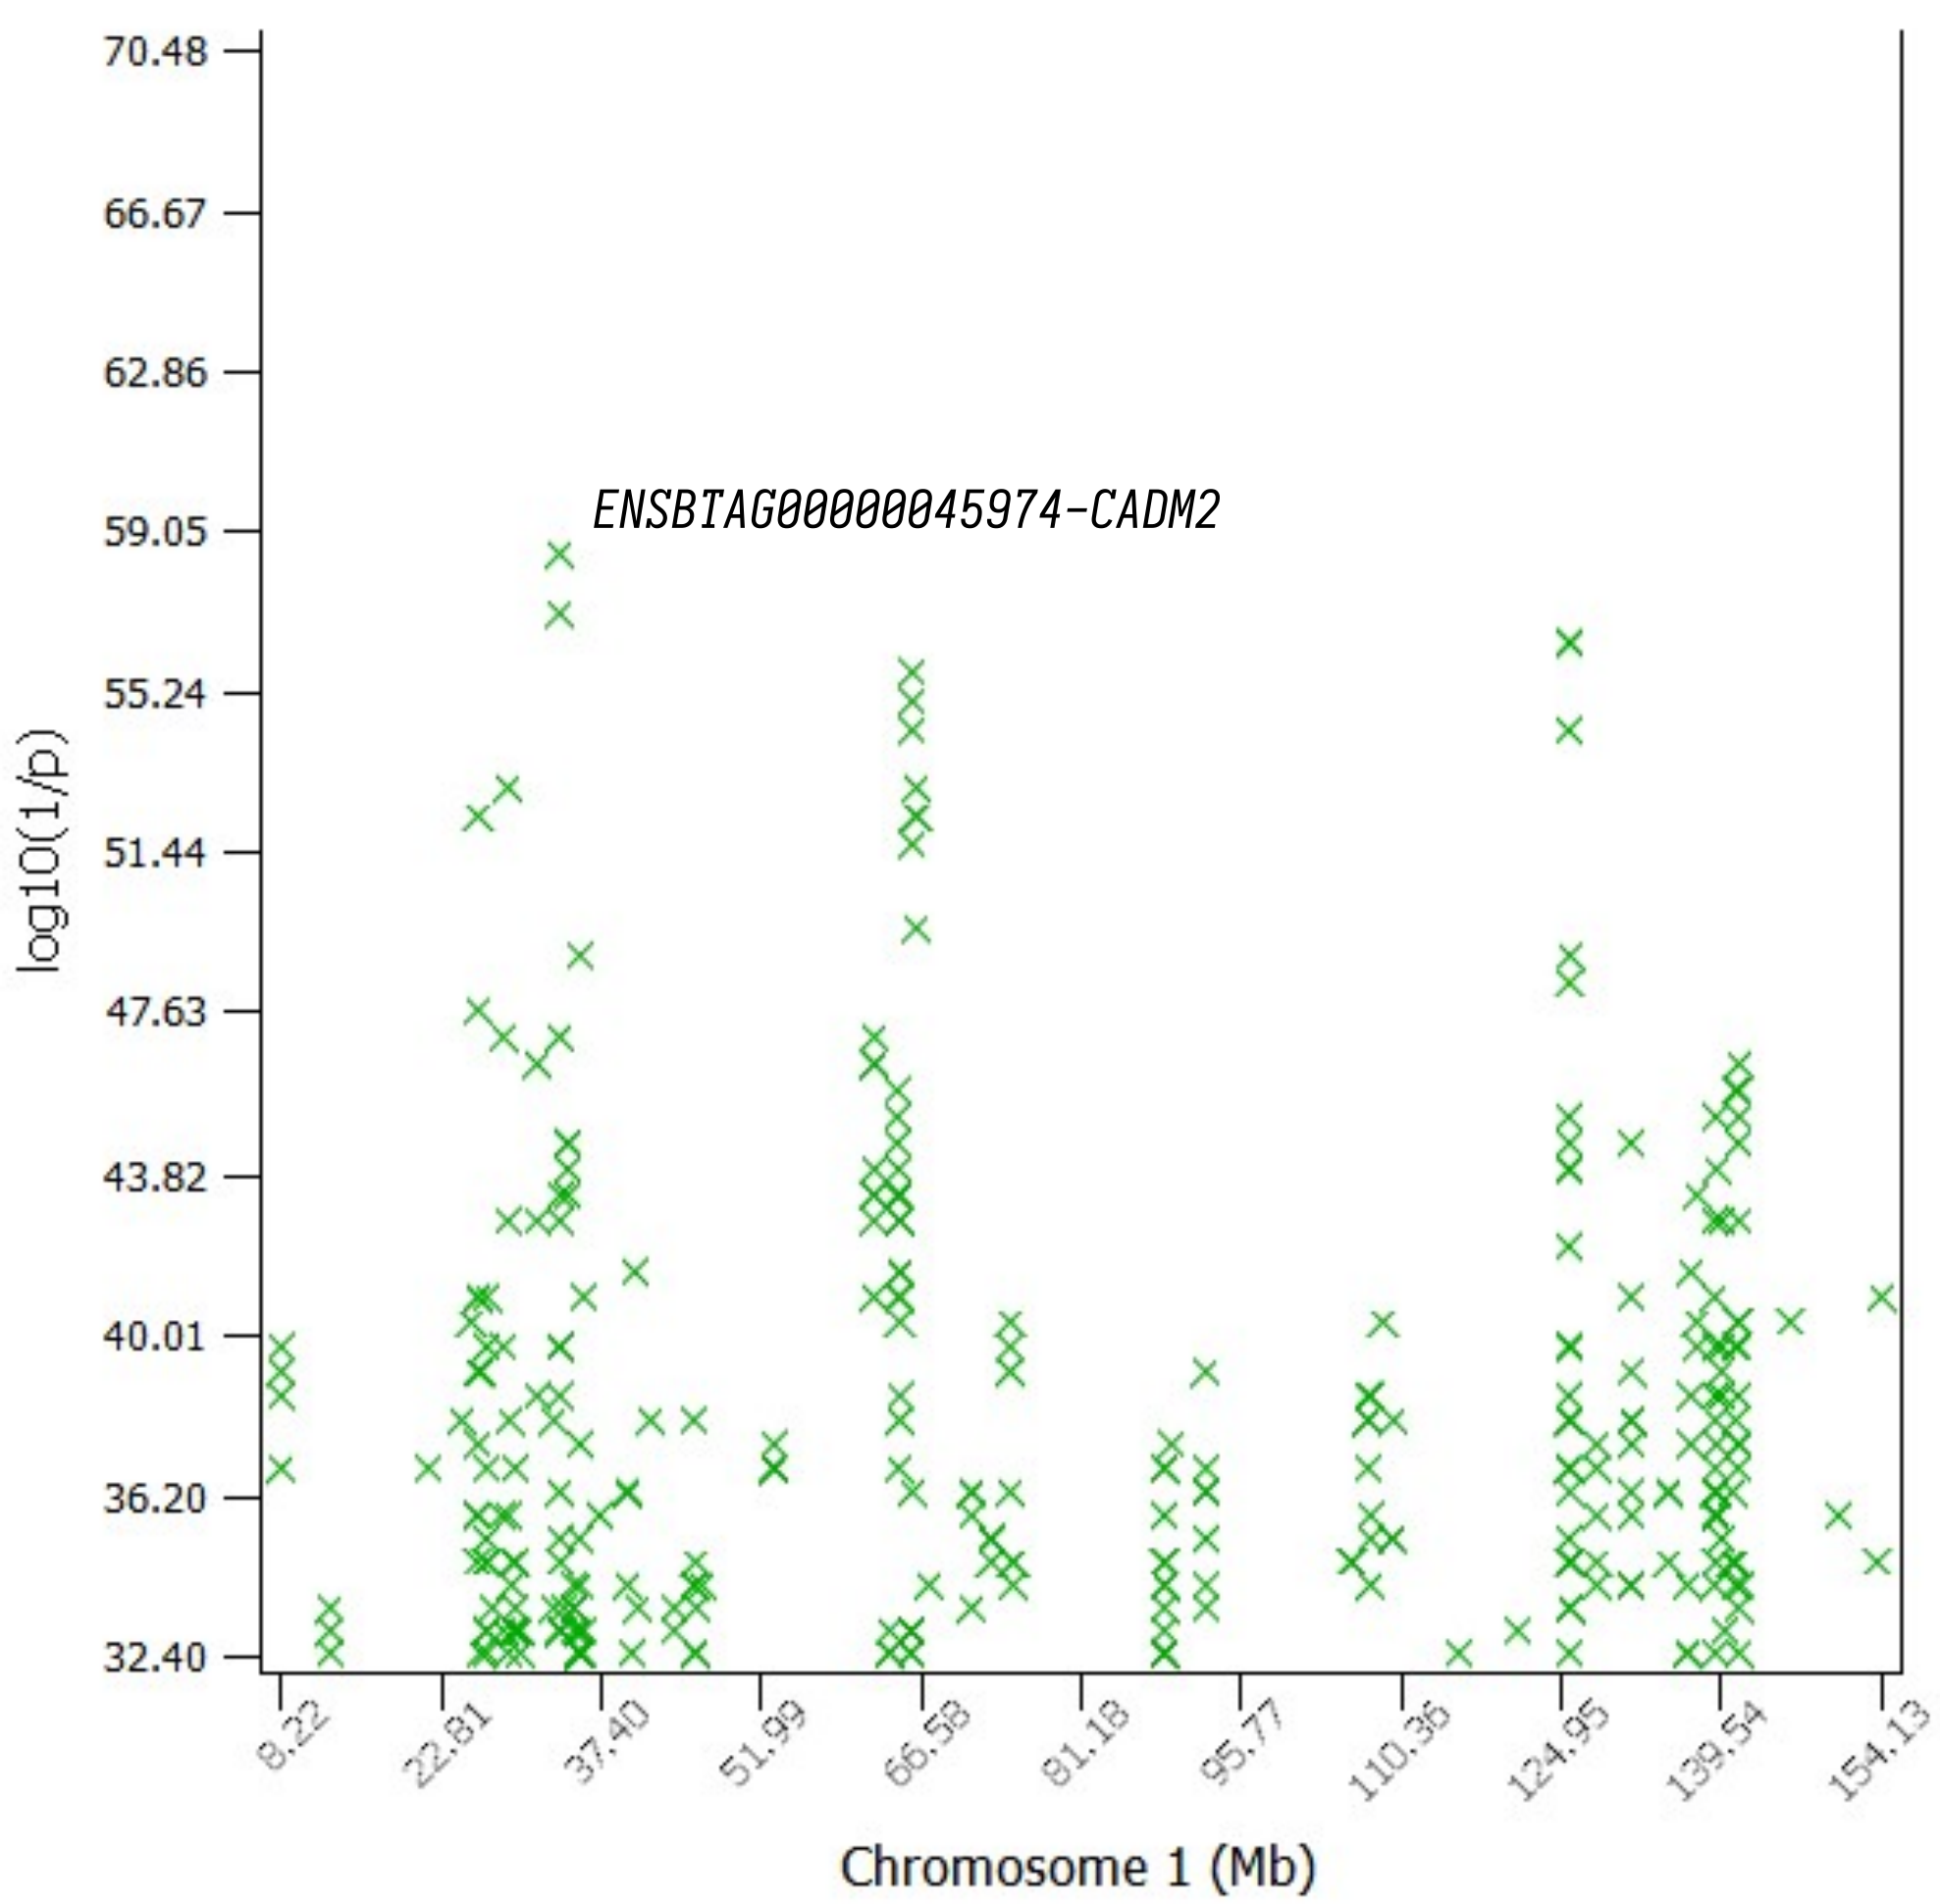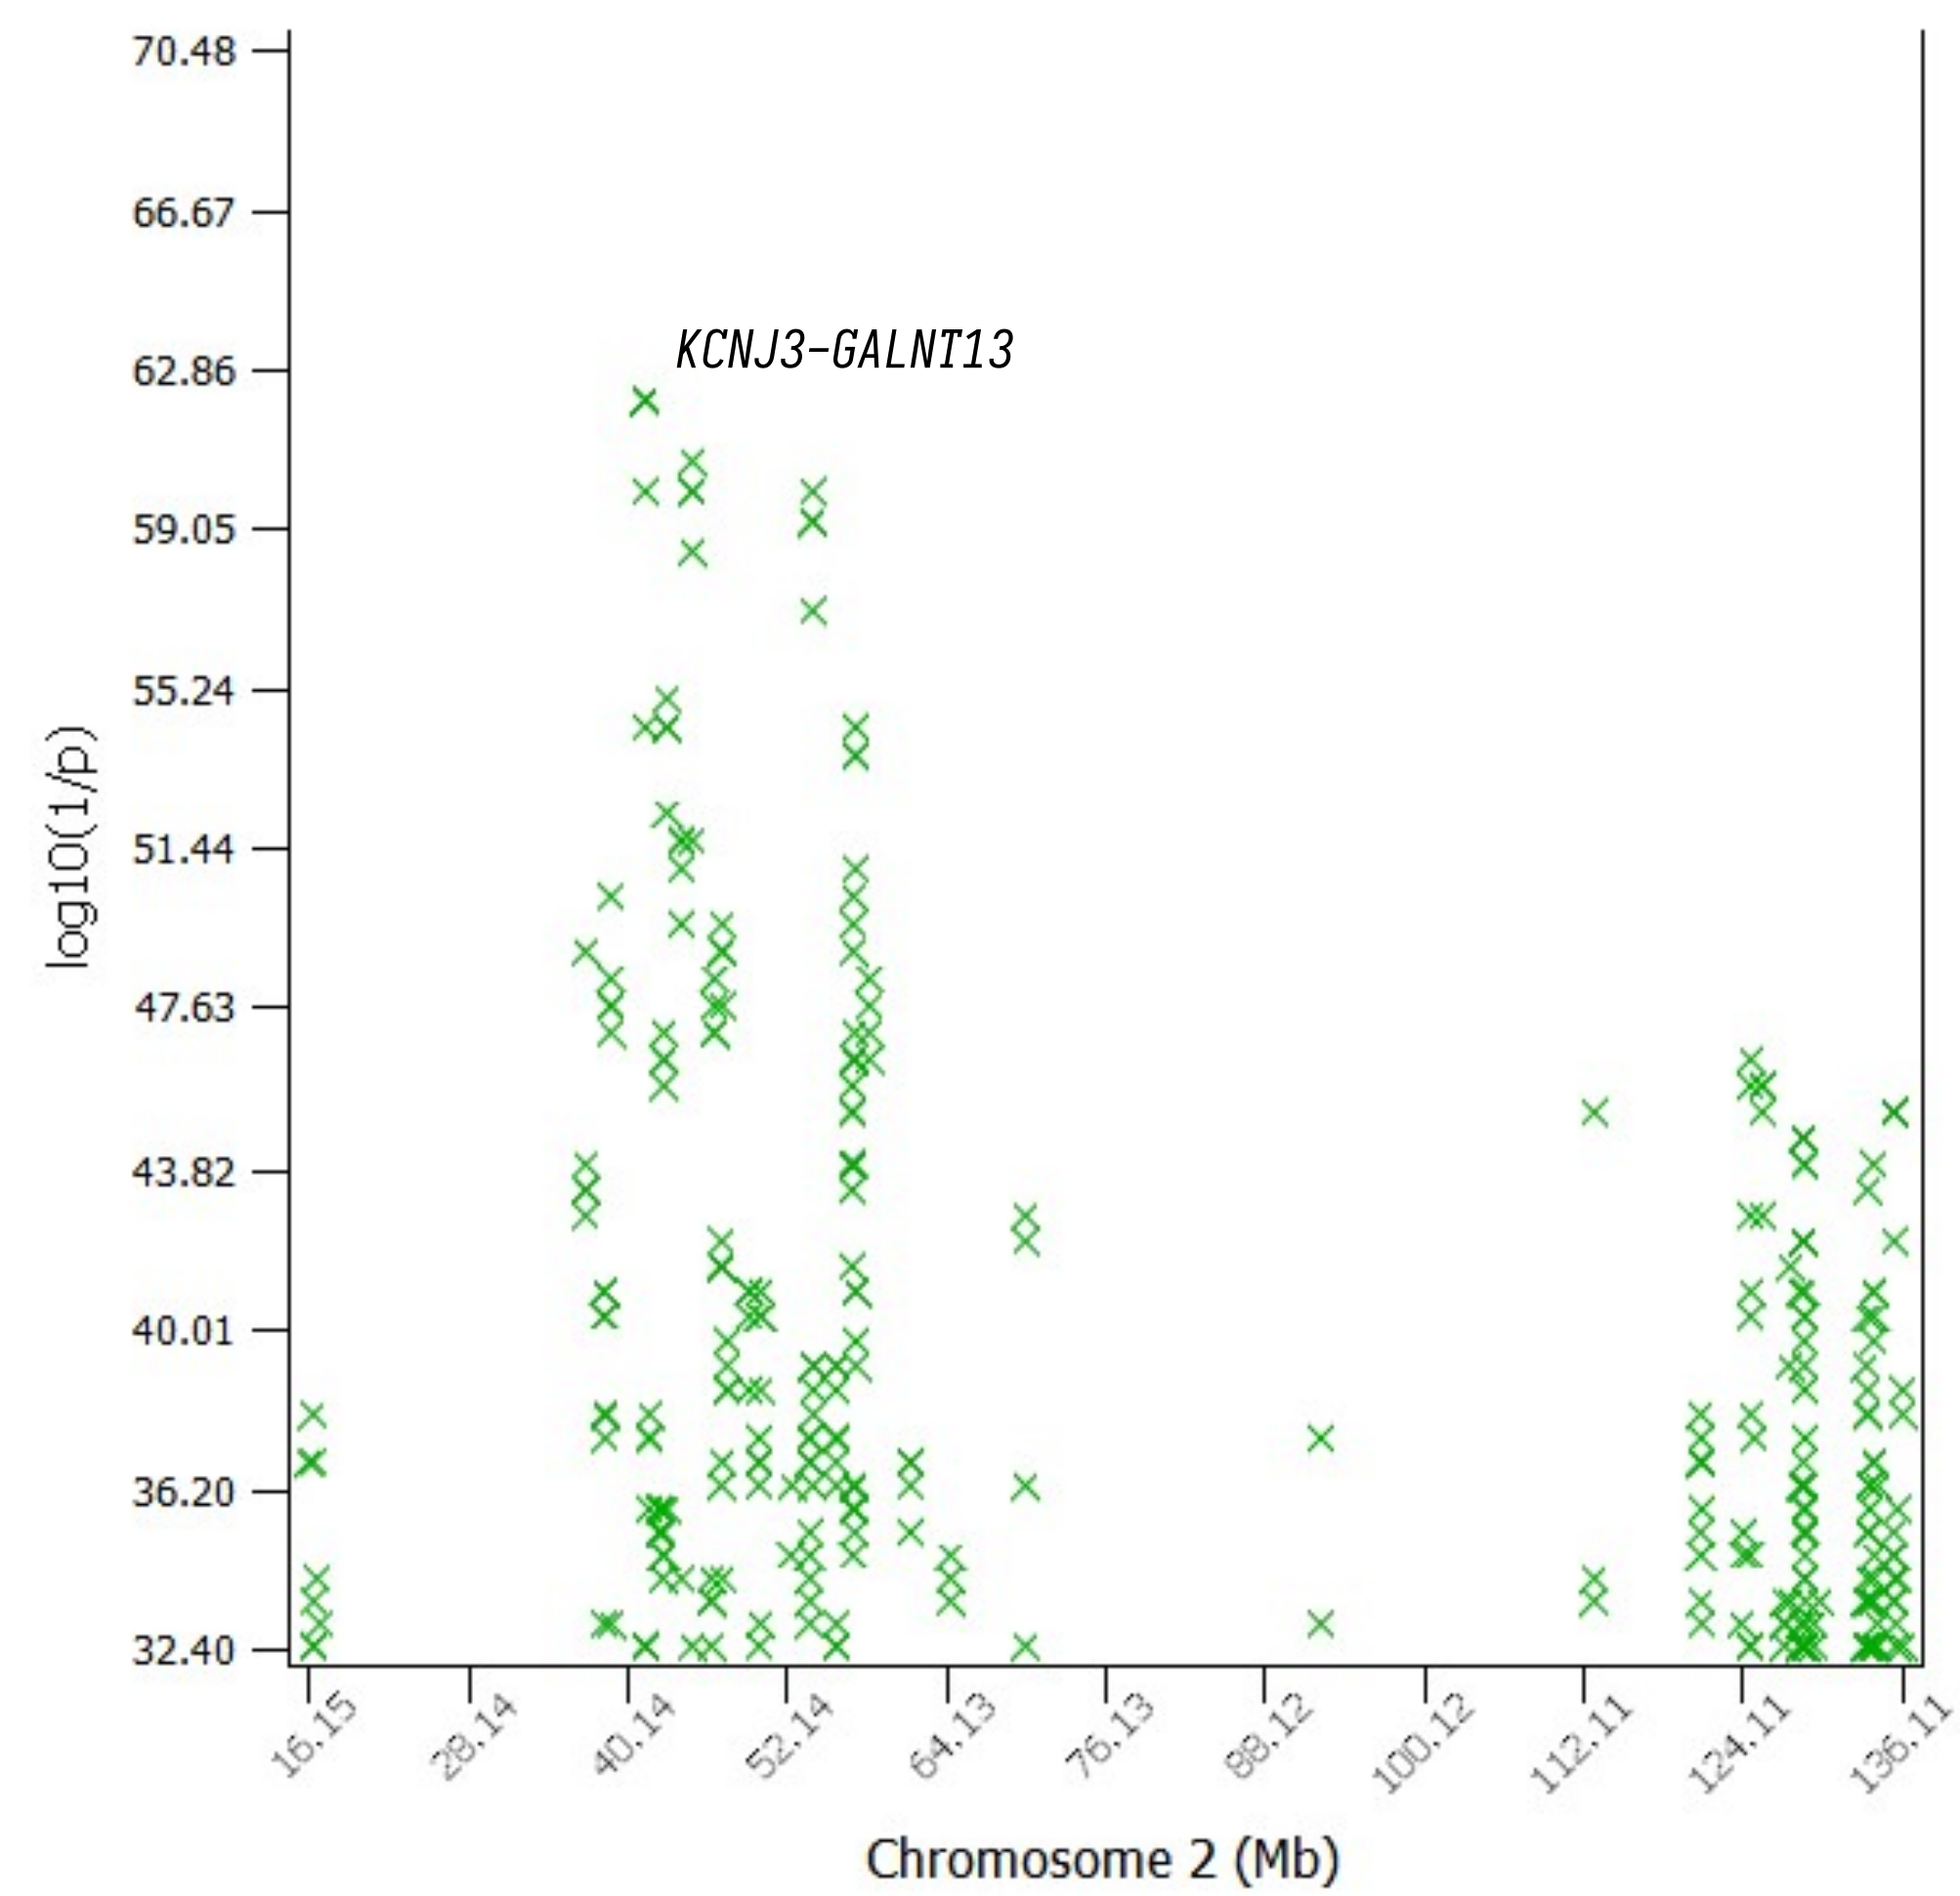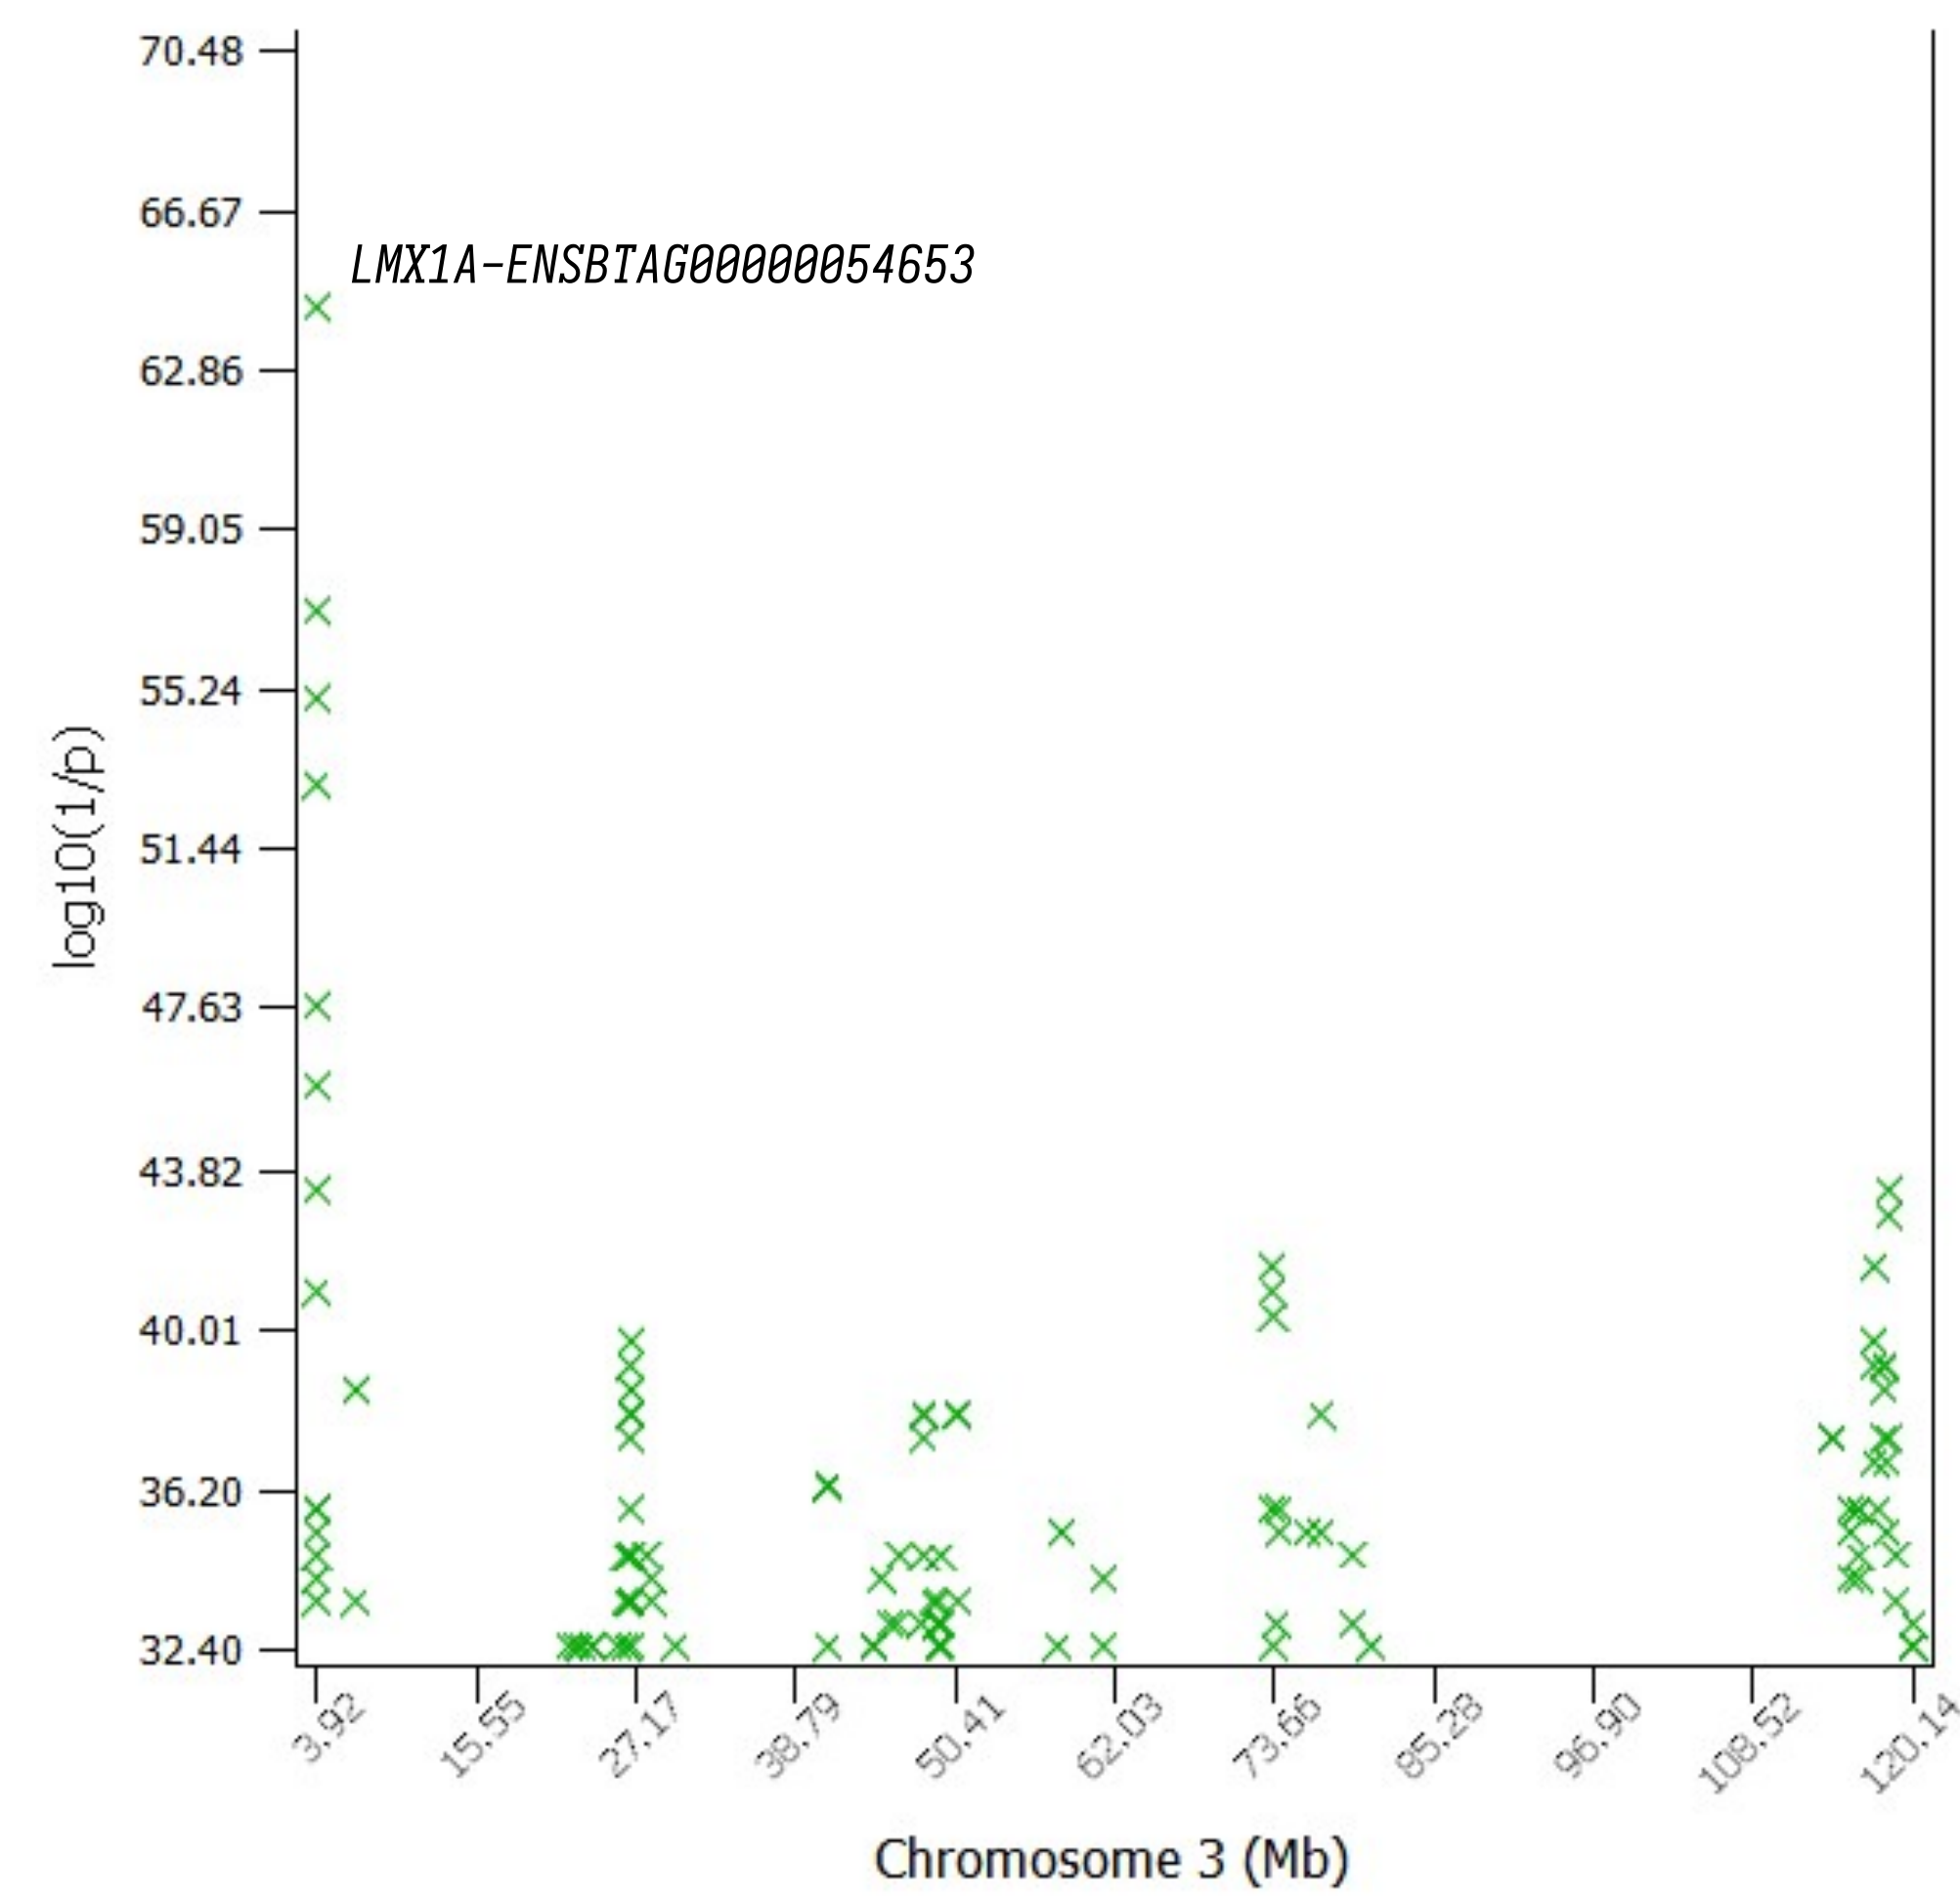



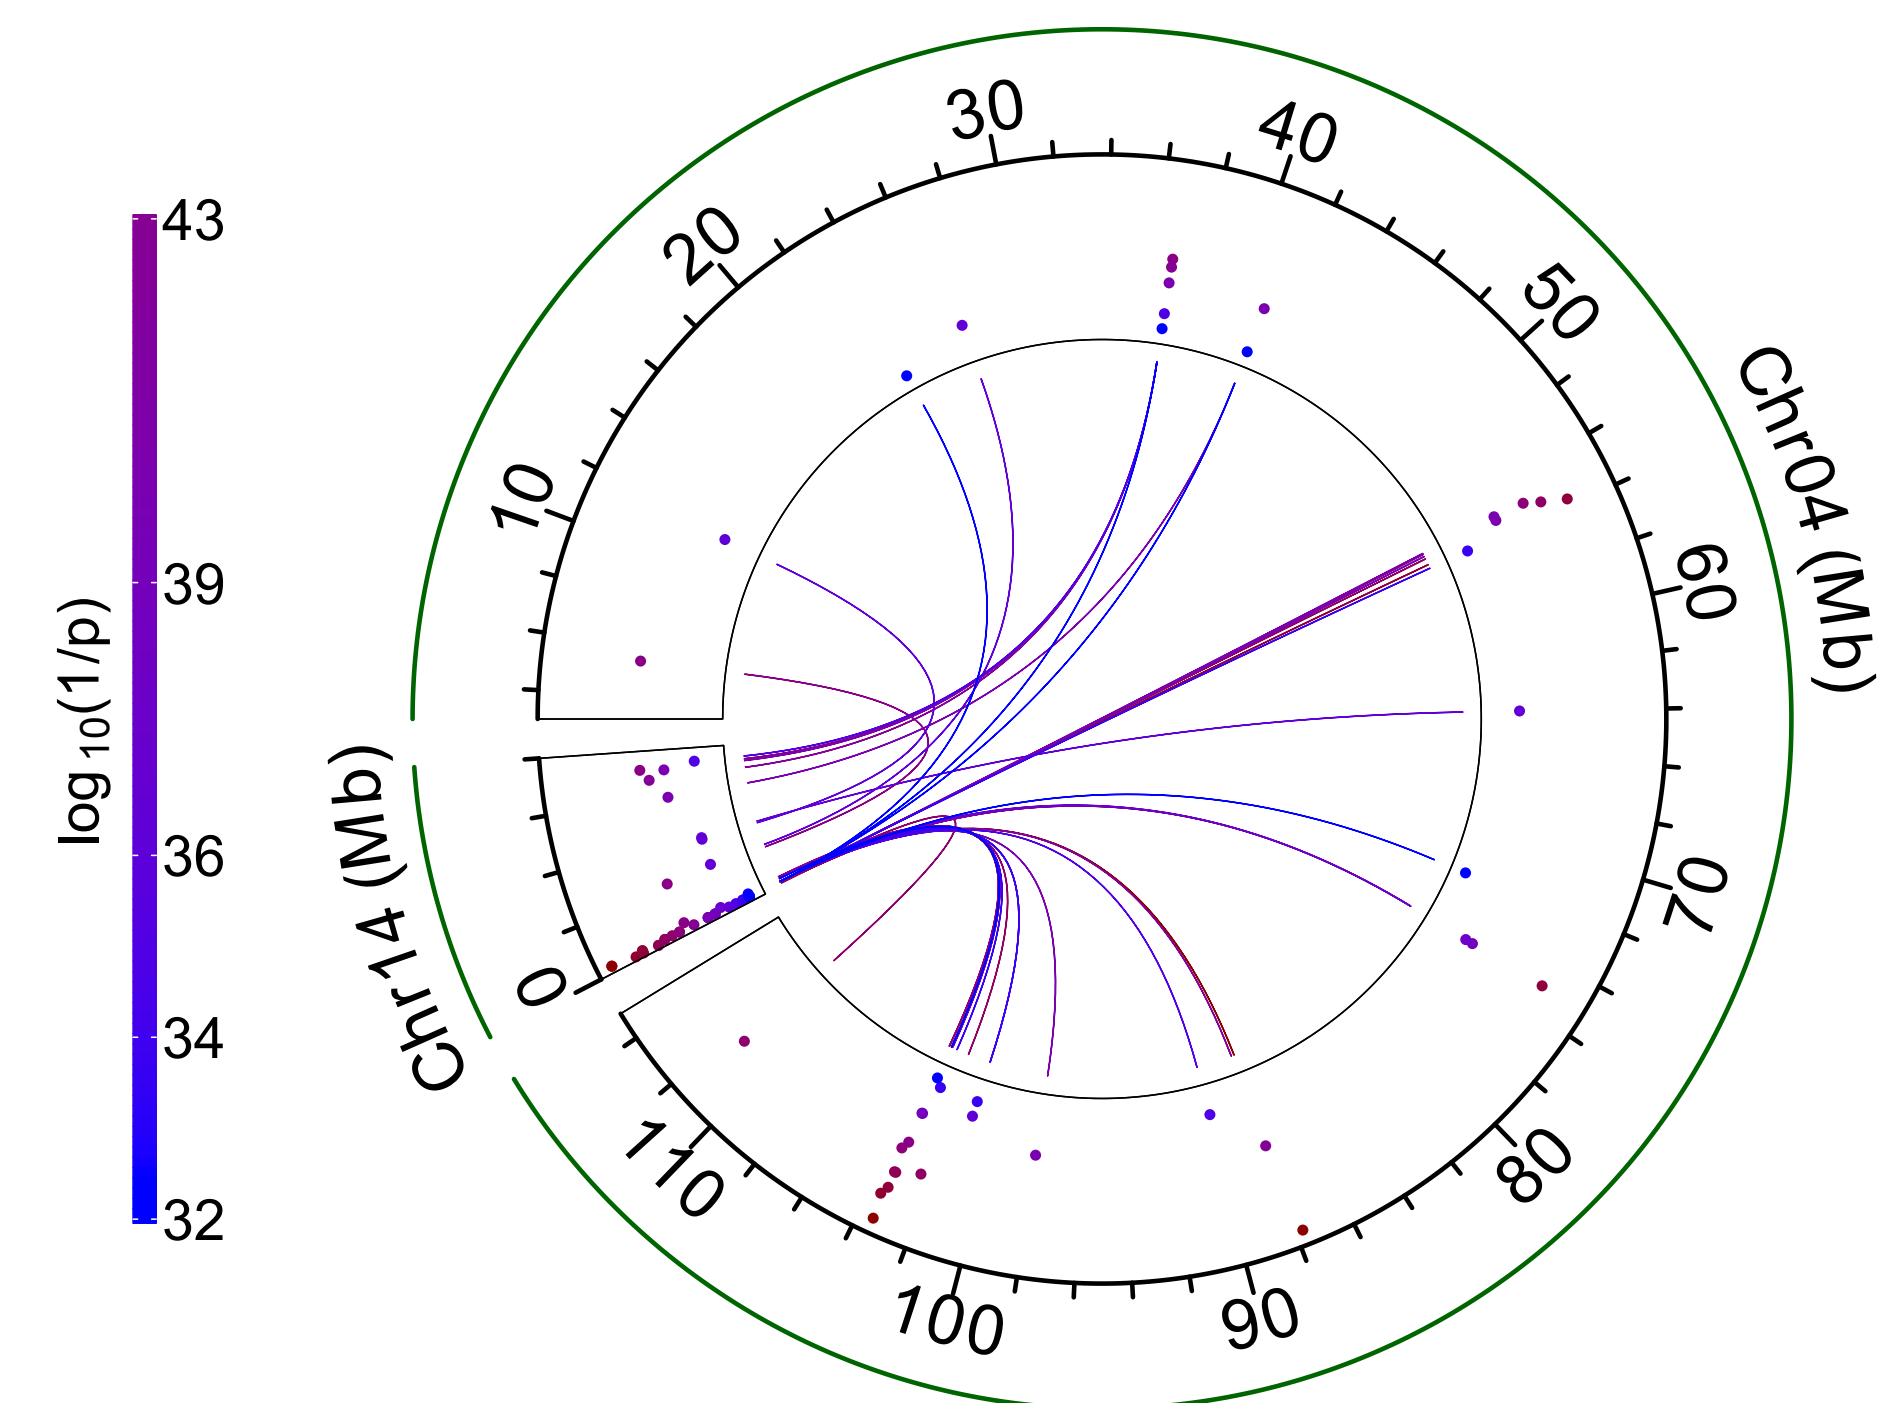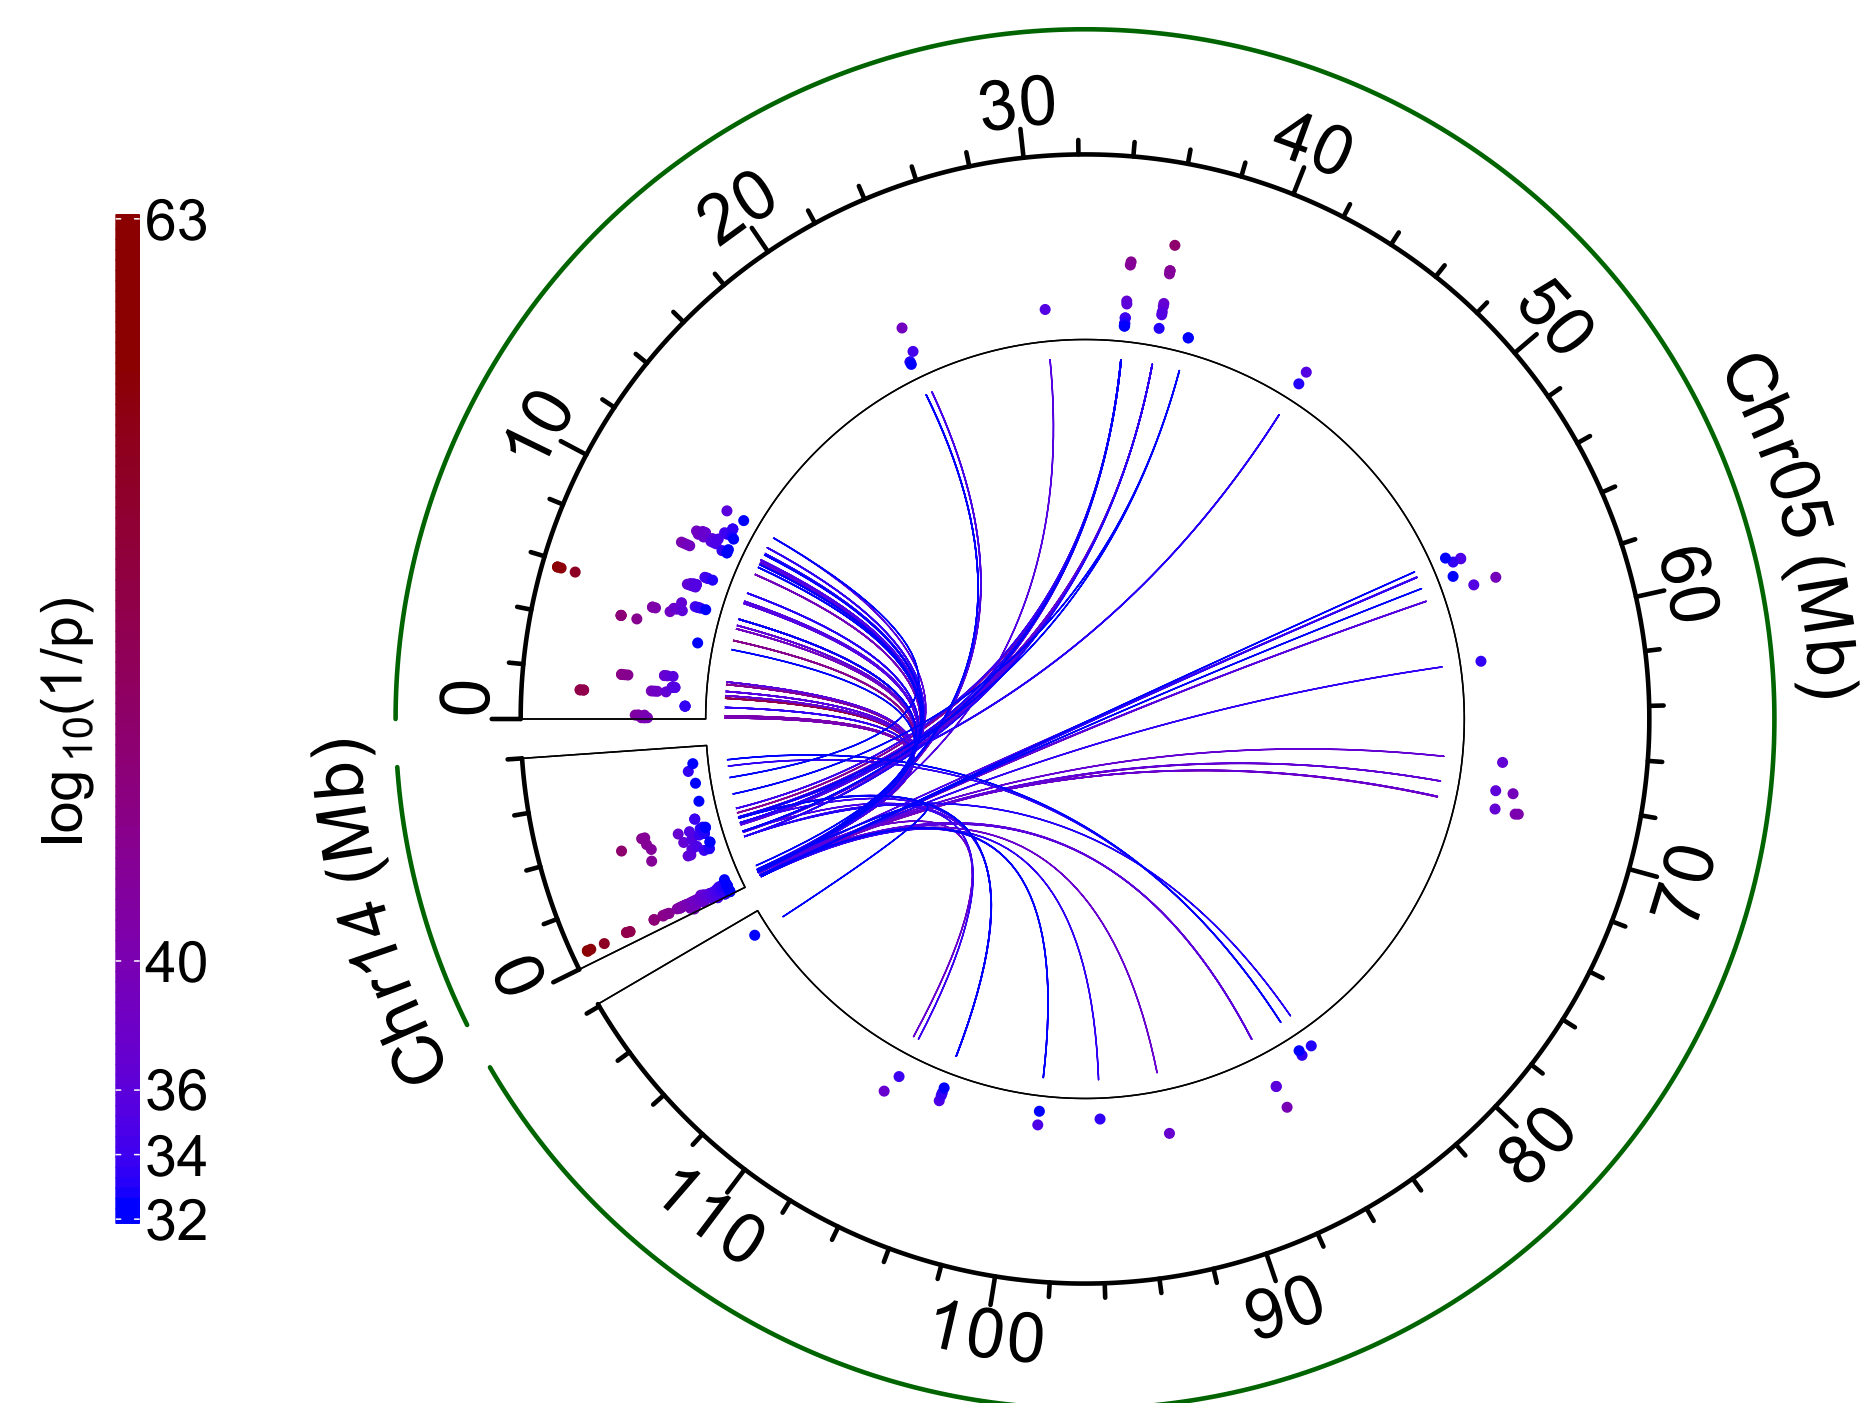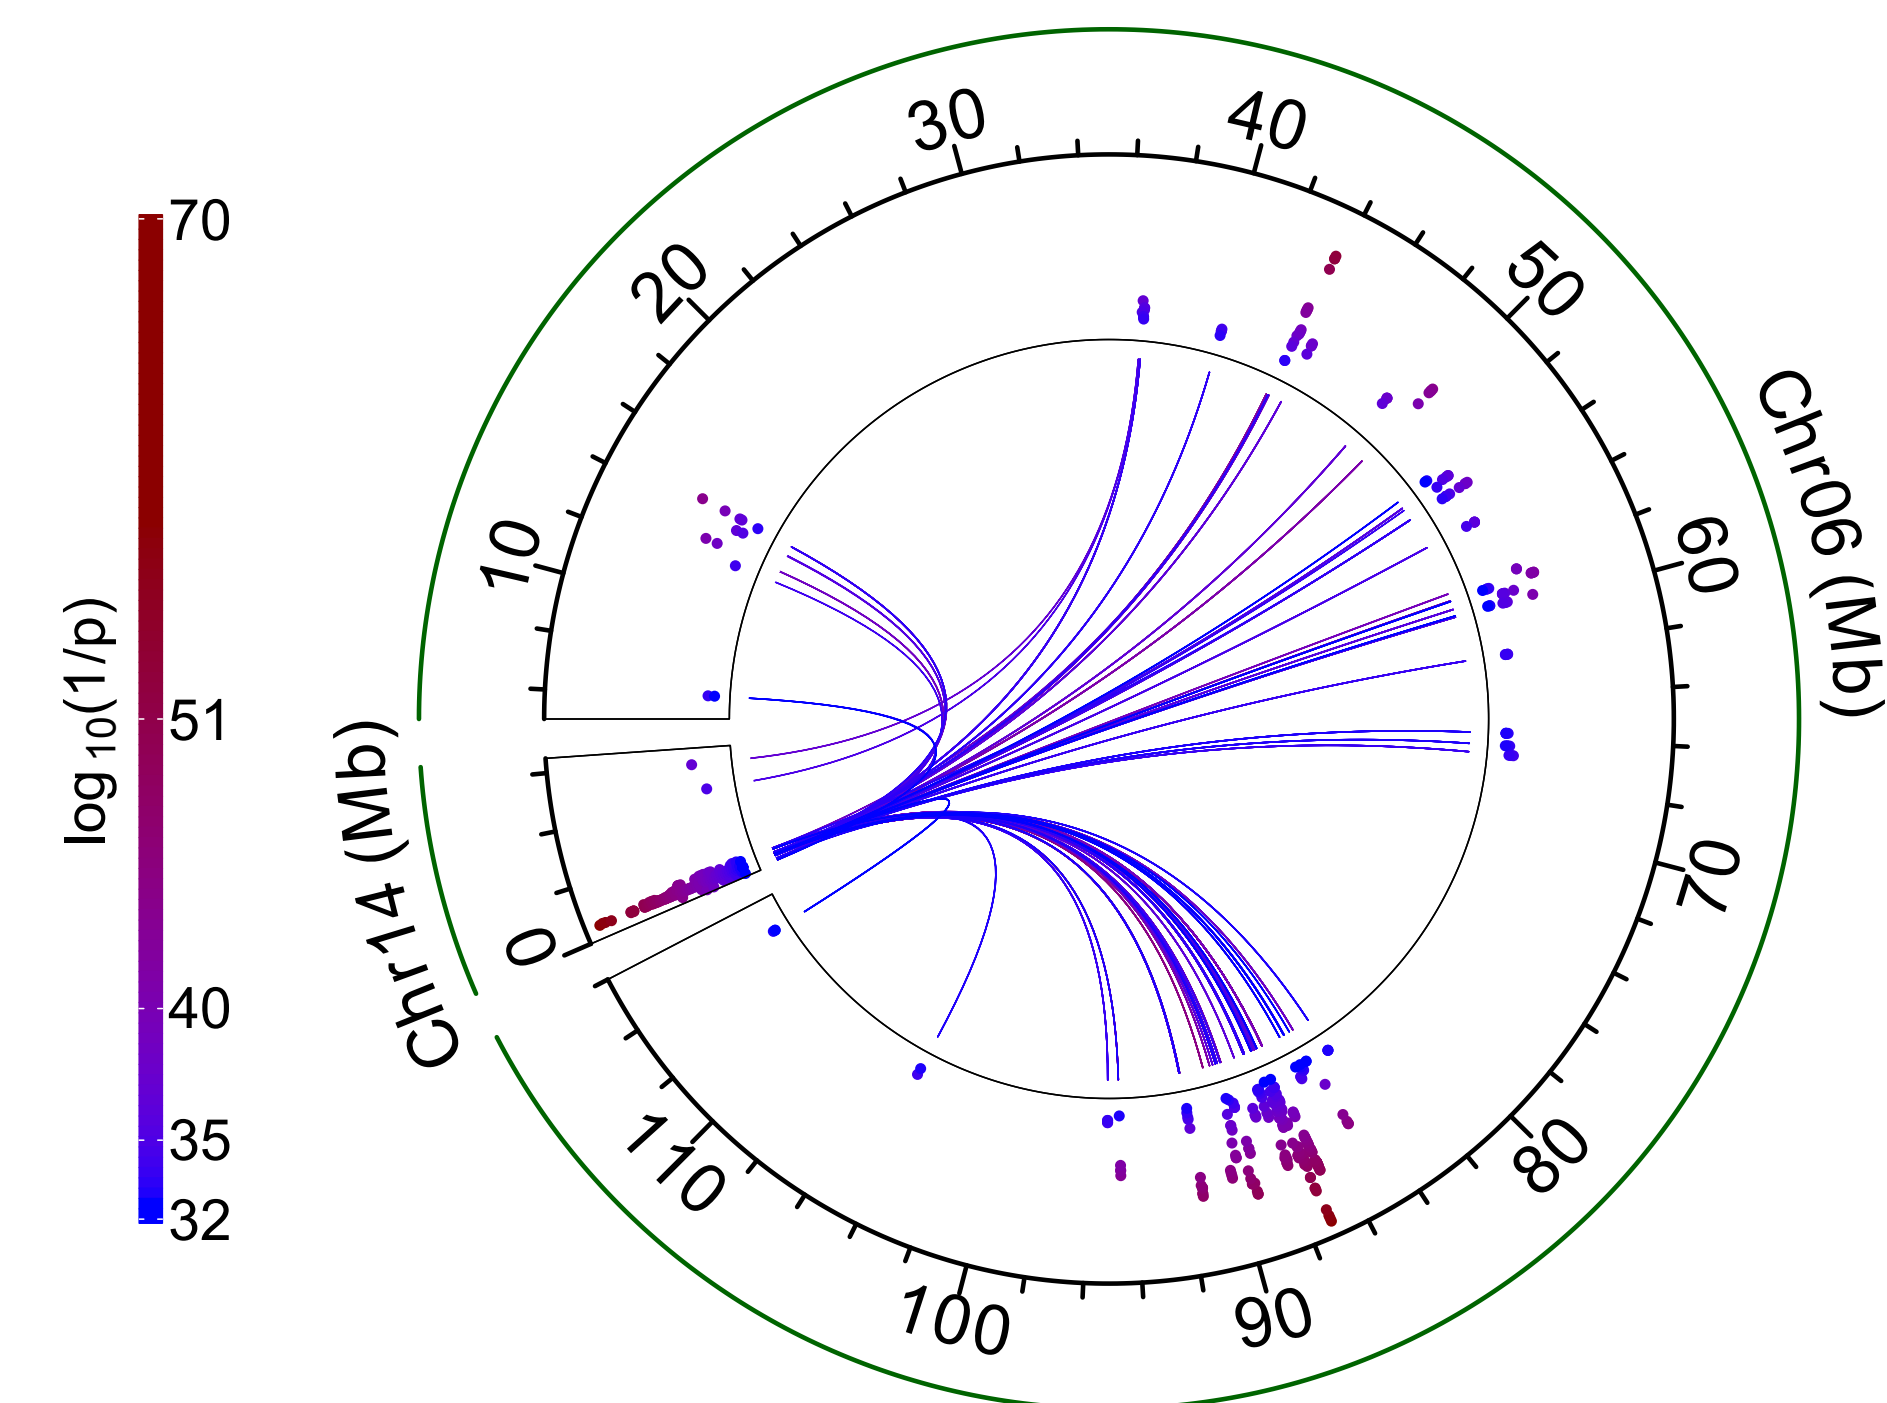

× AxA effect

× AxA effect

× AxA effect

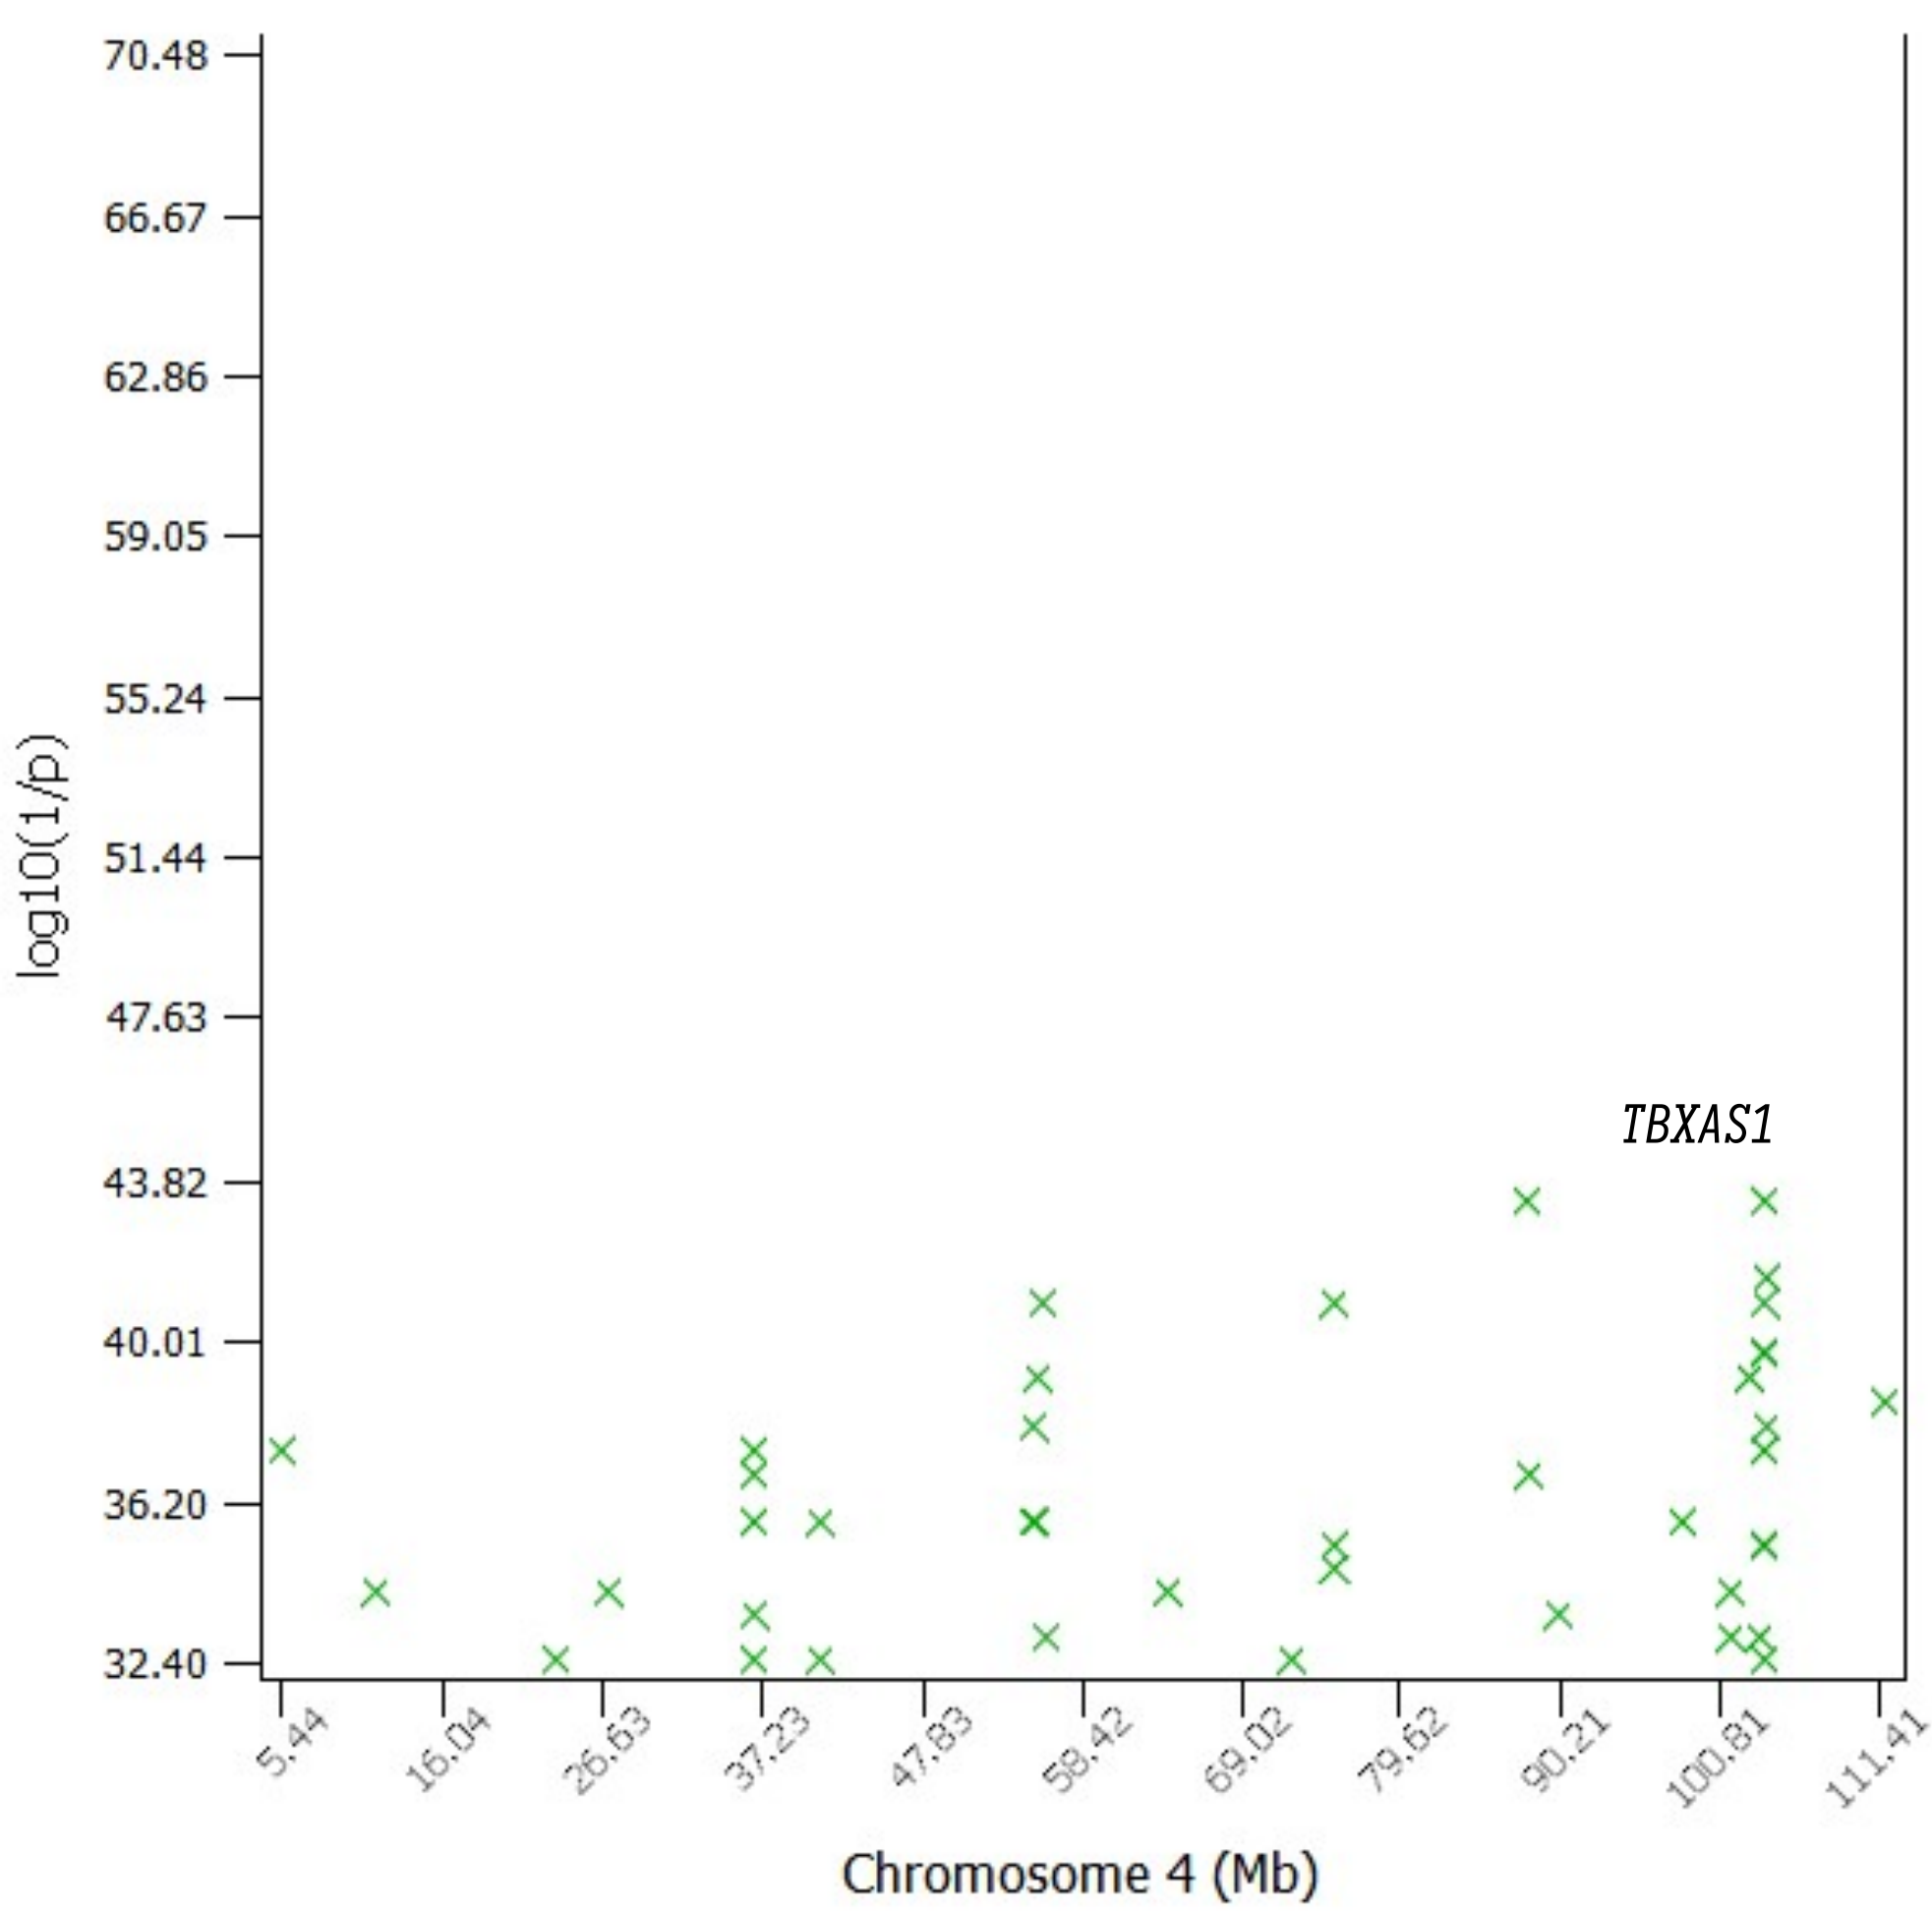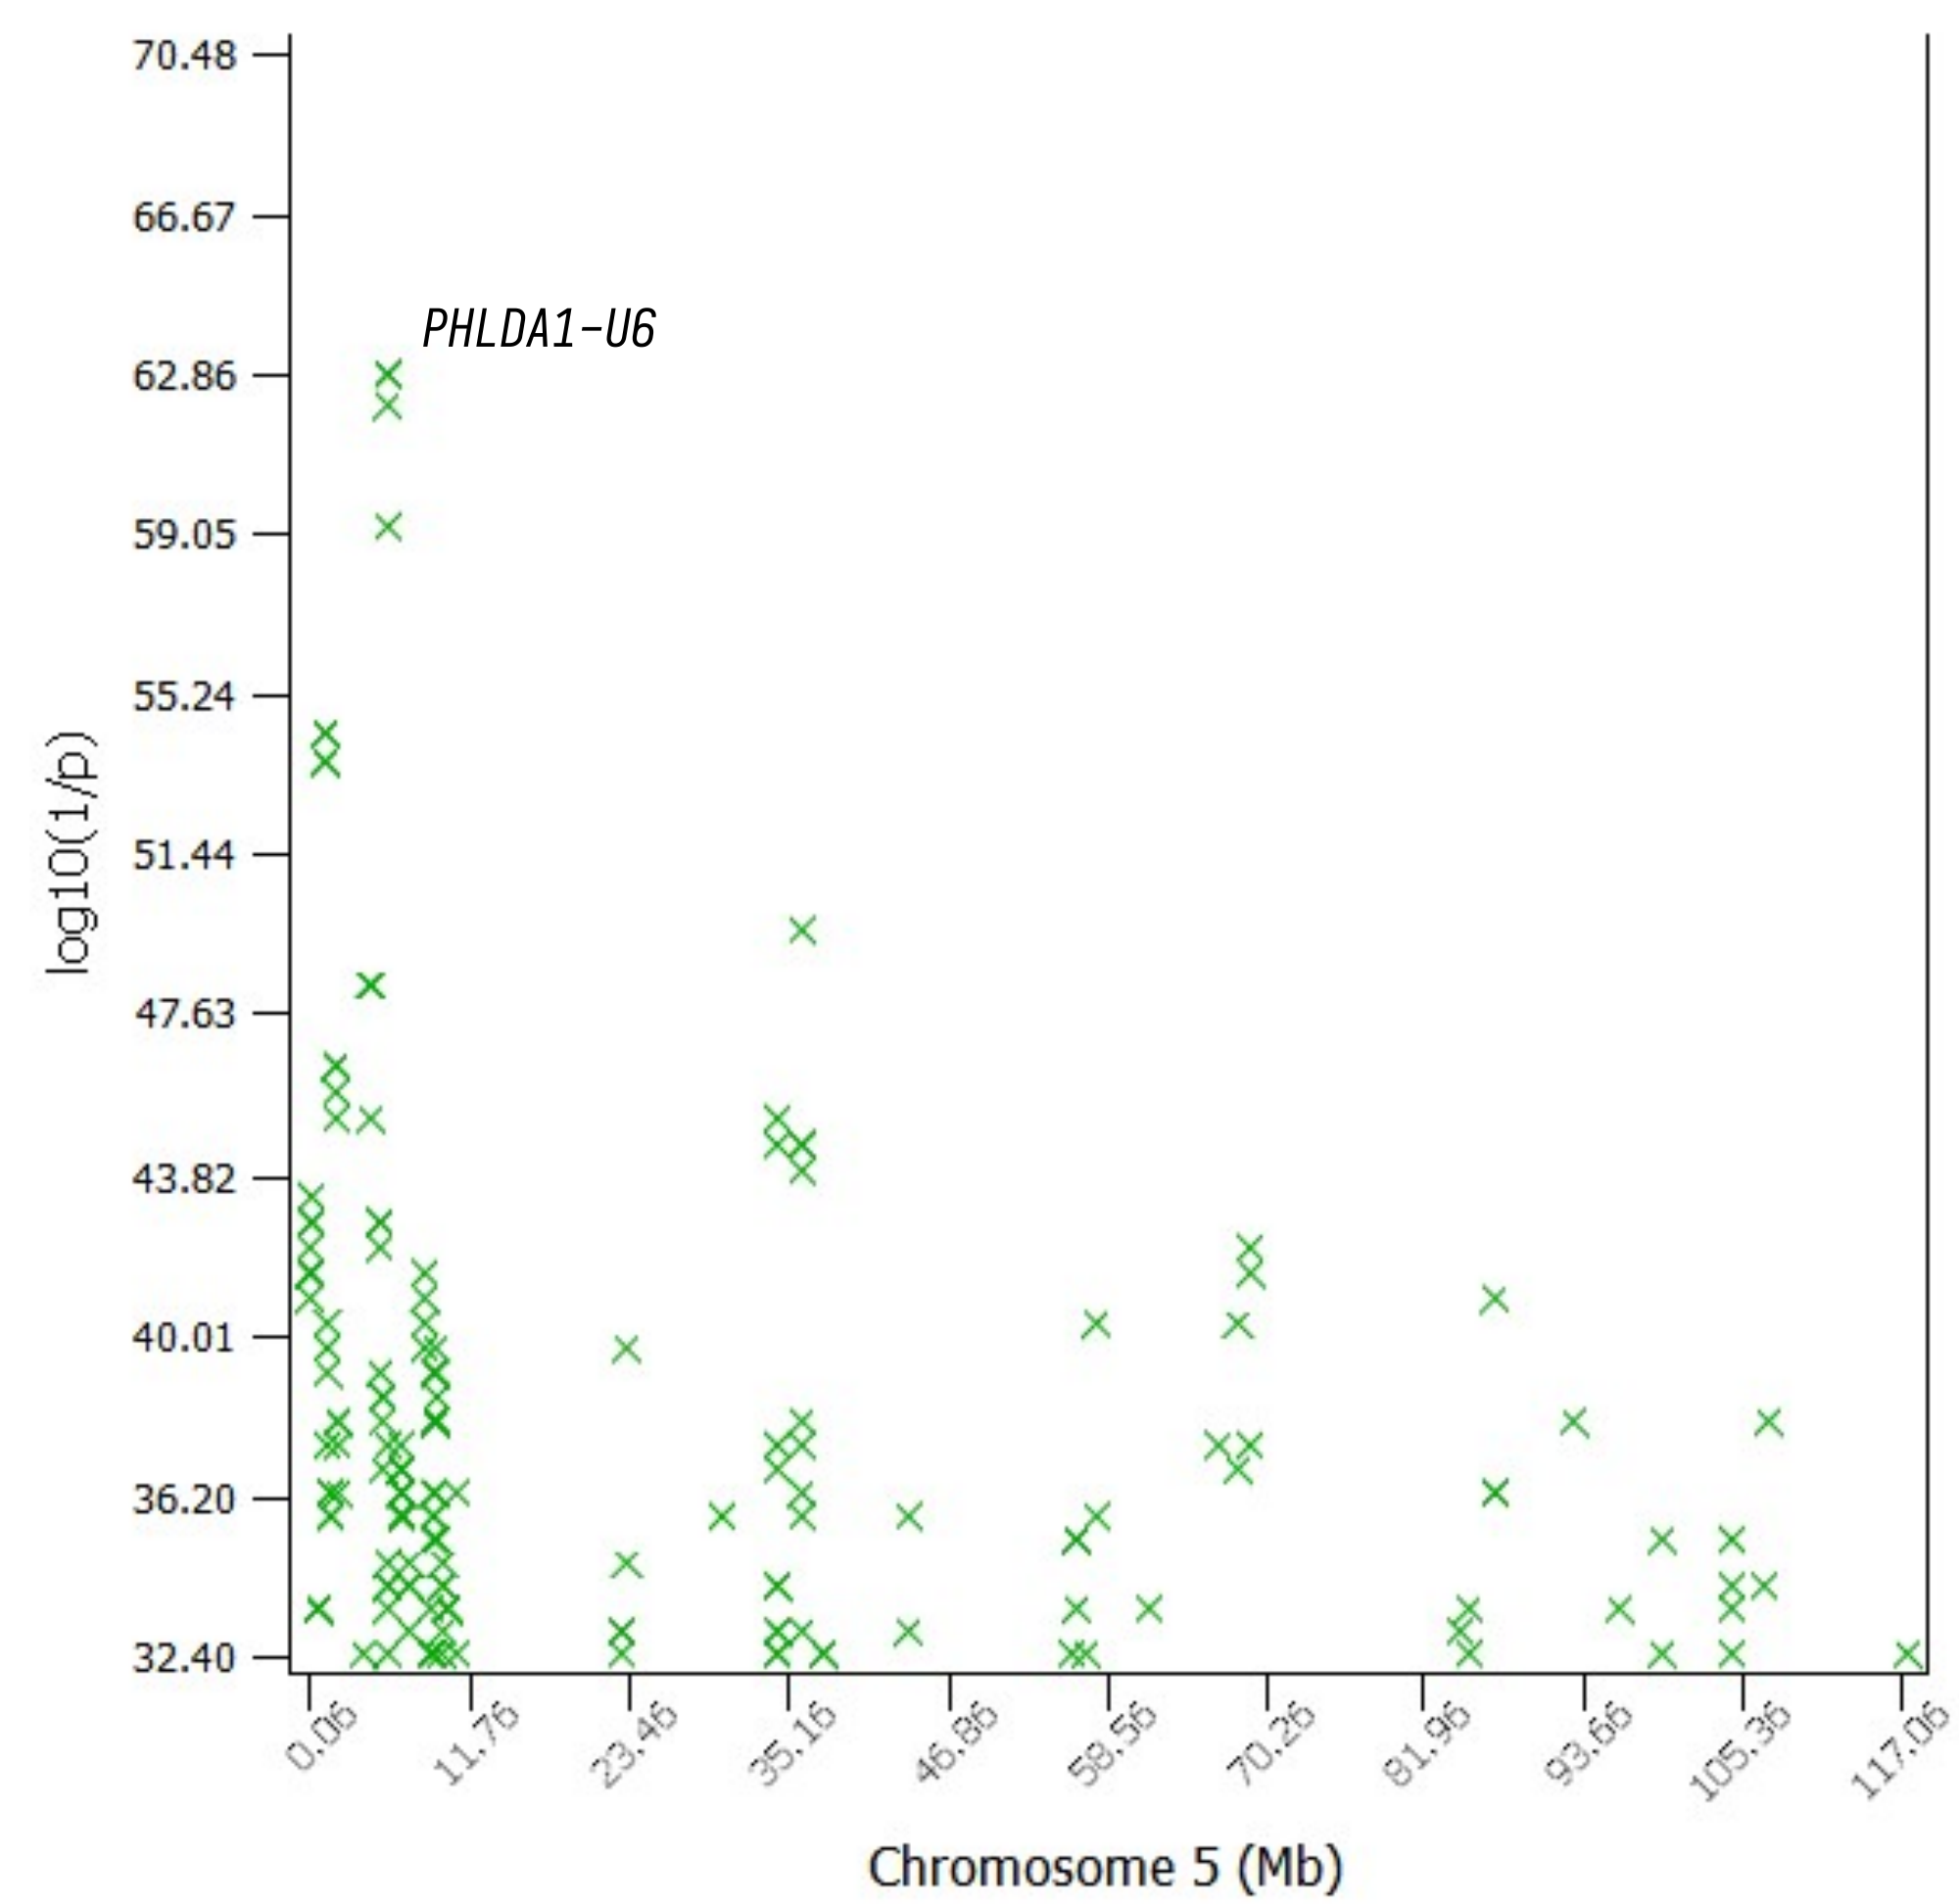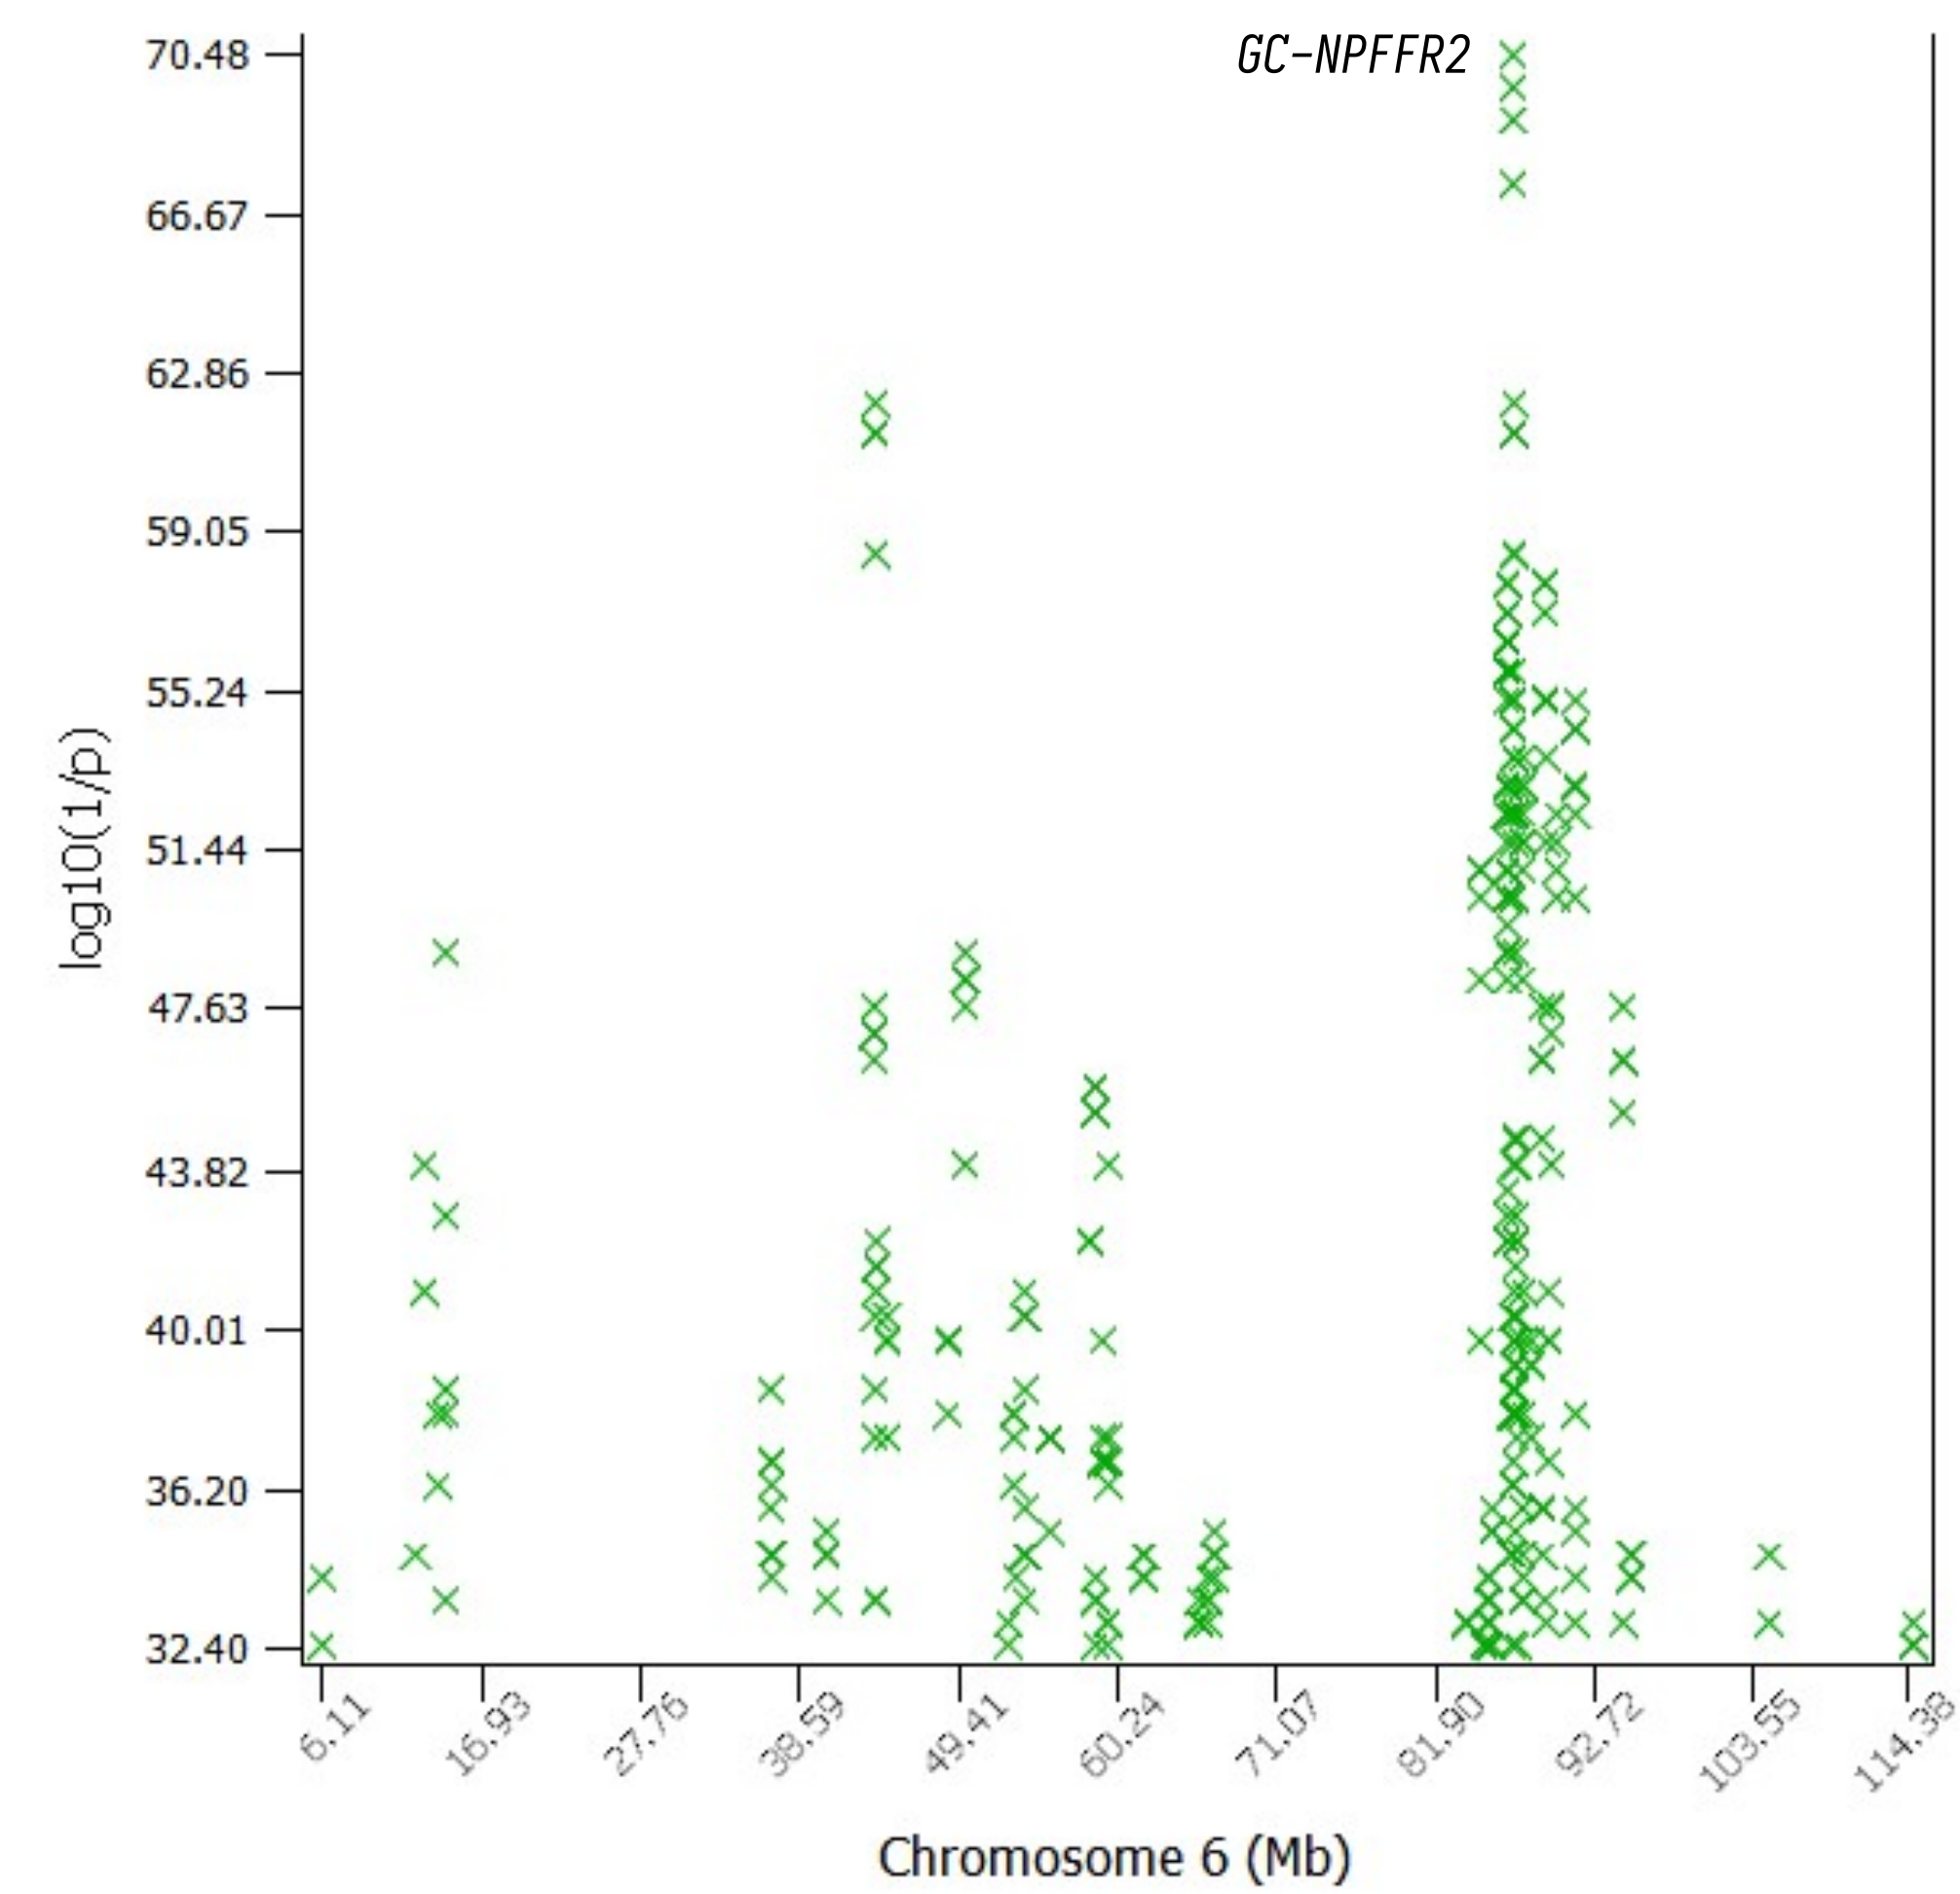



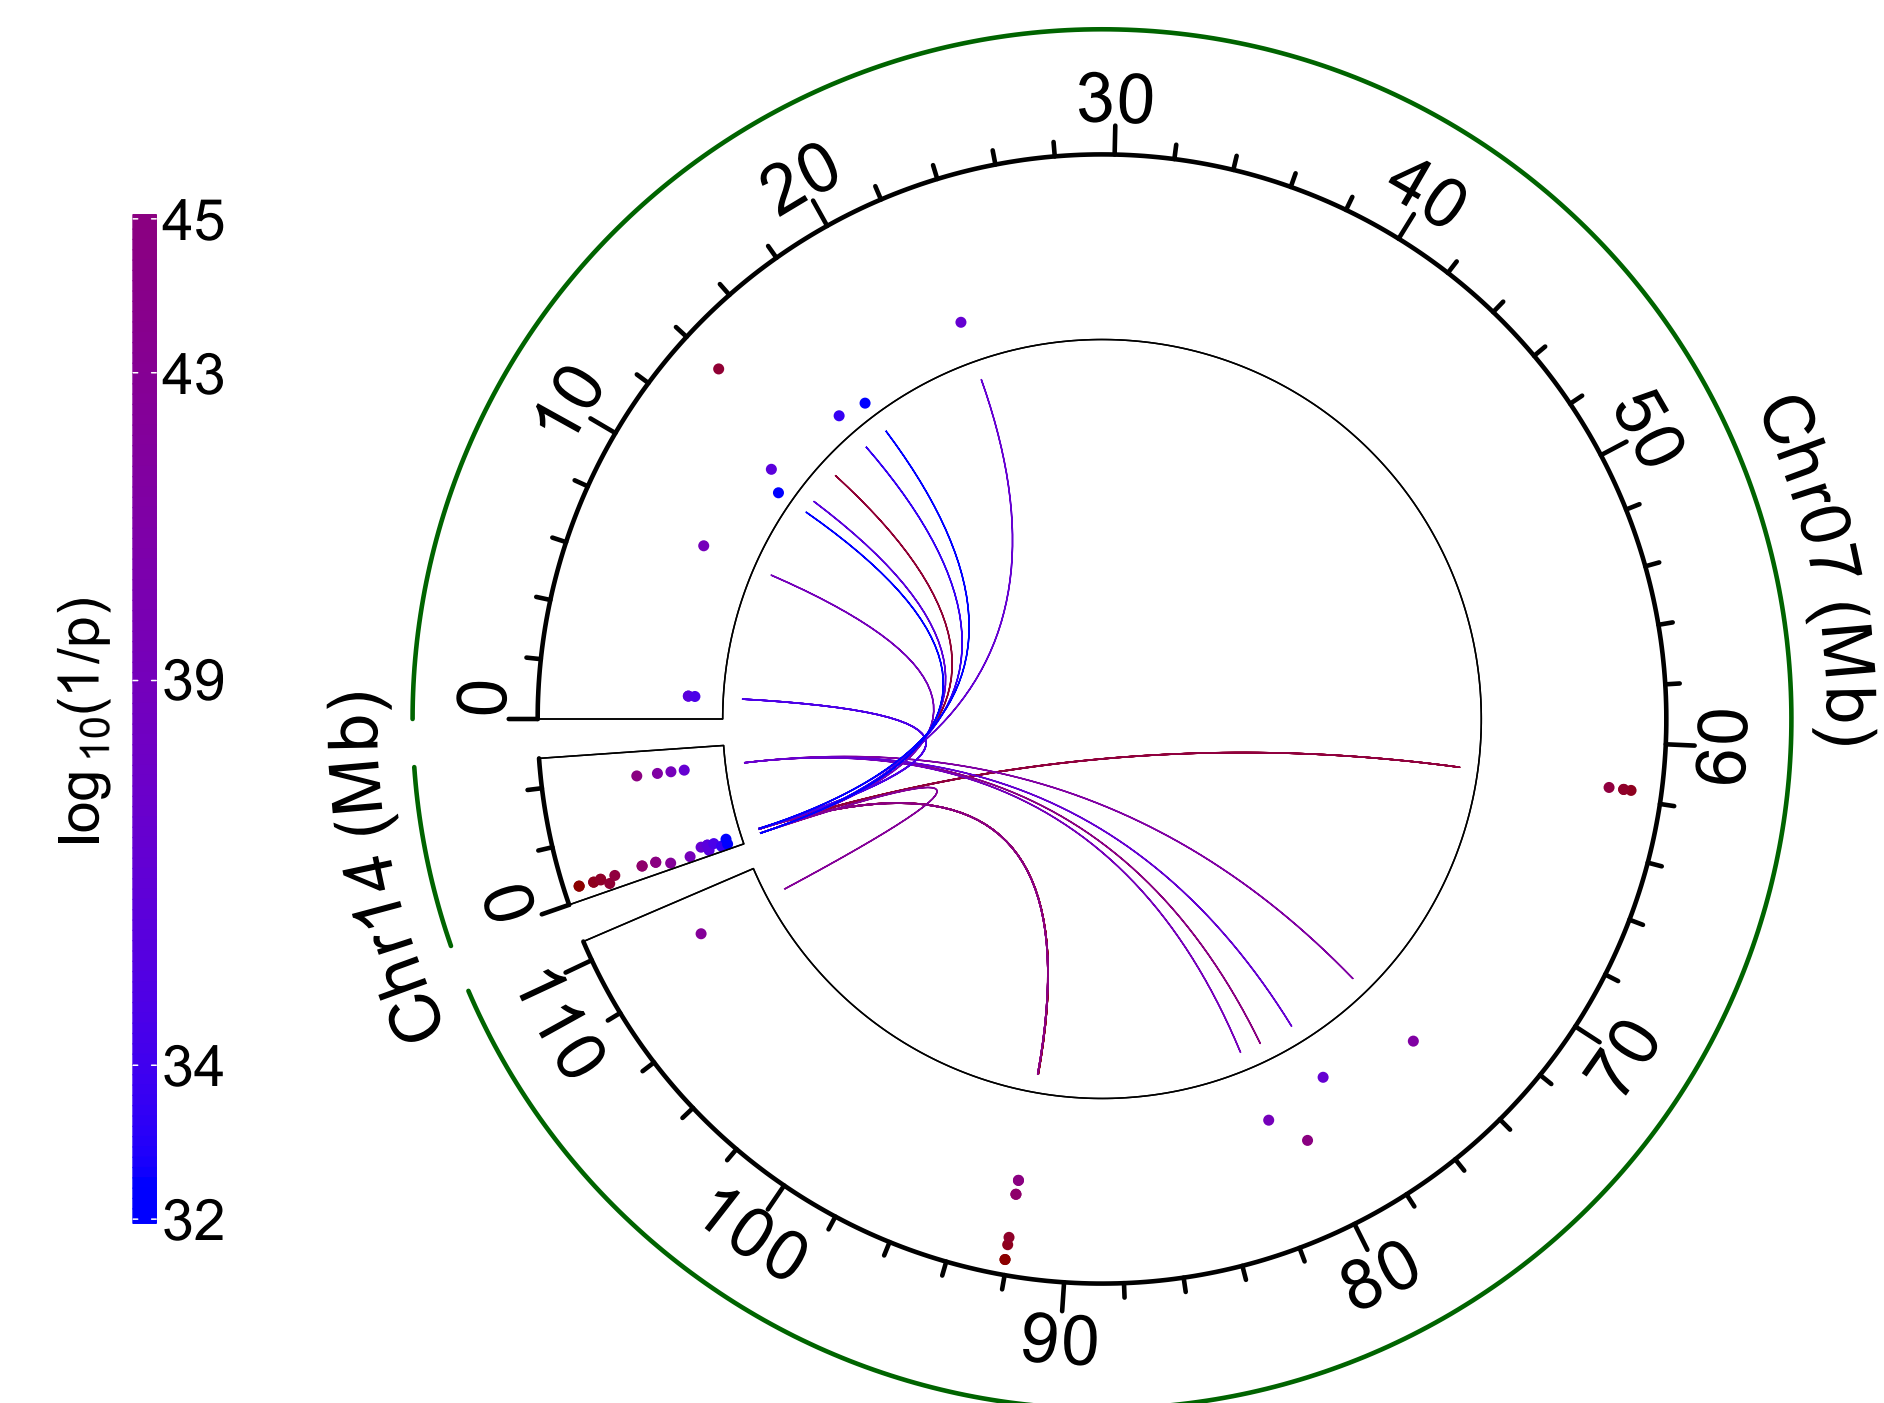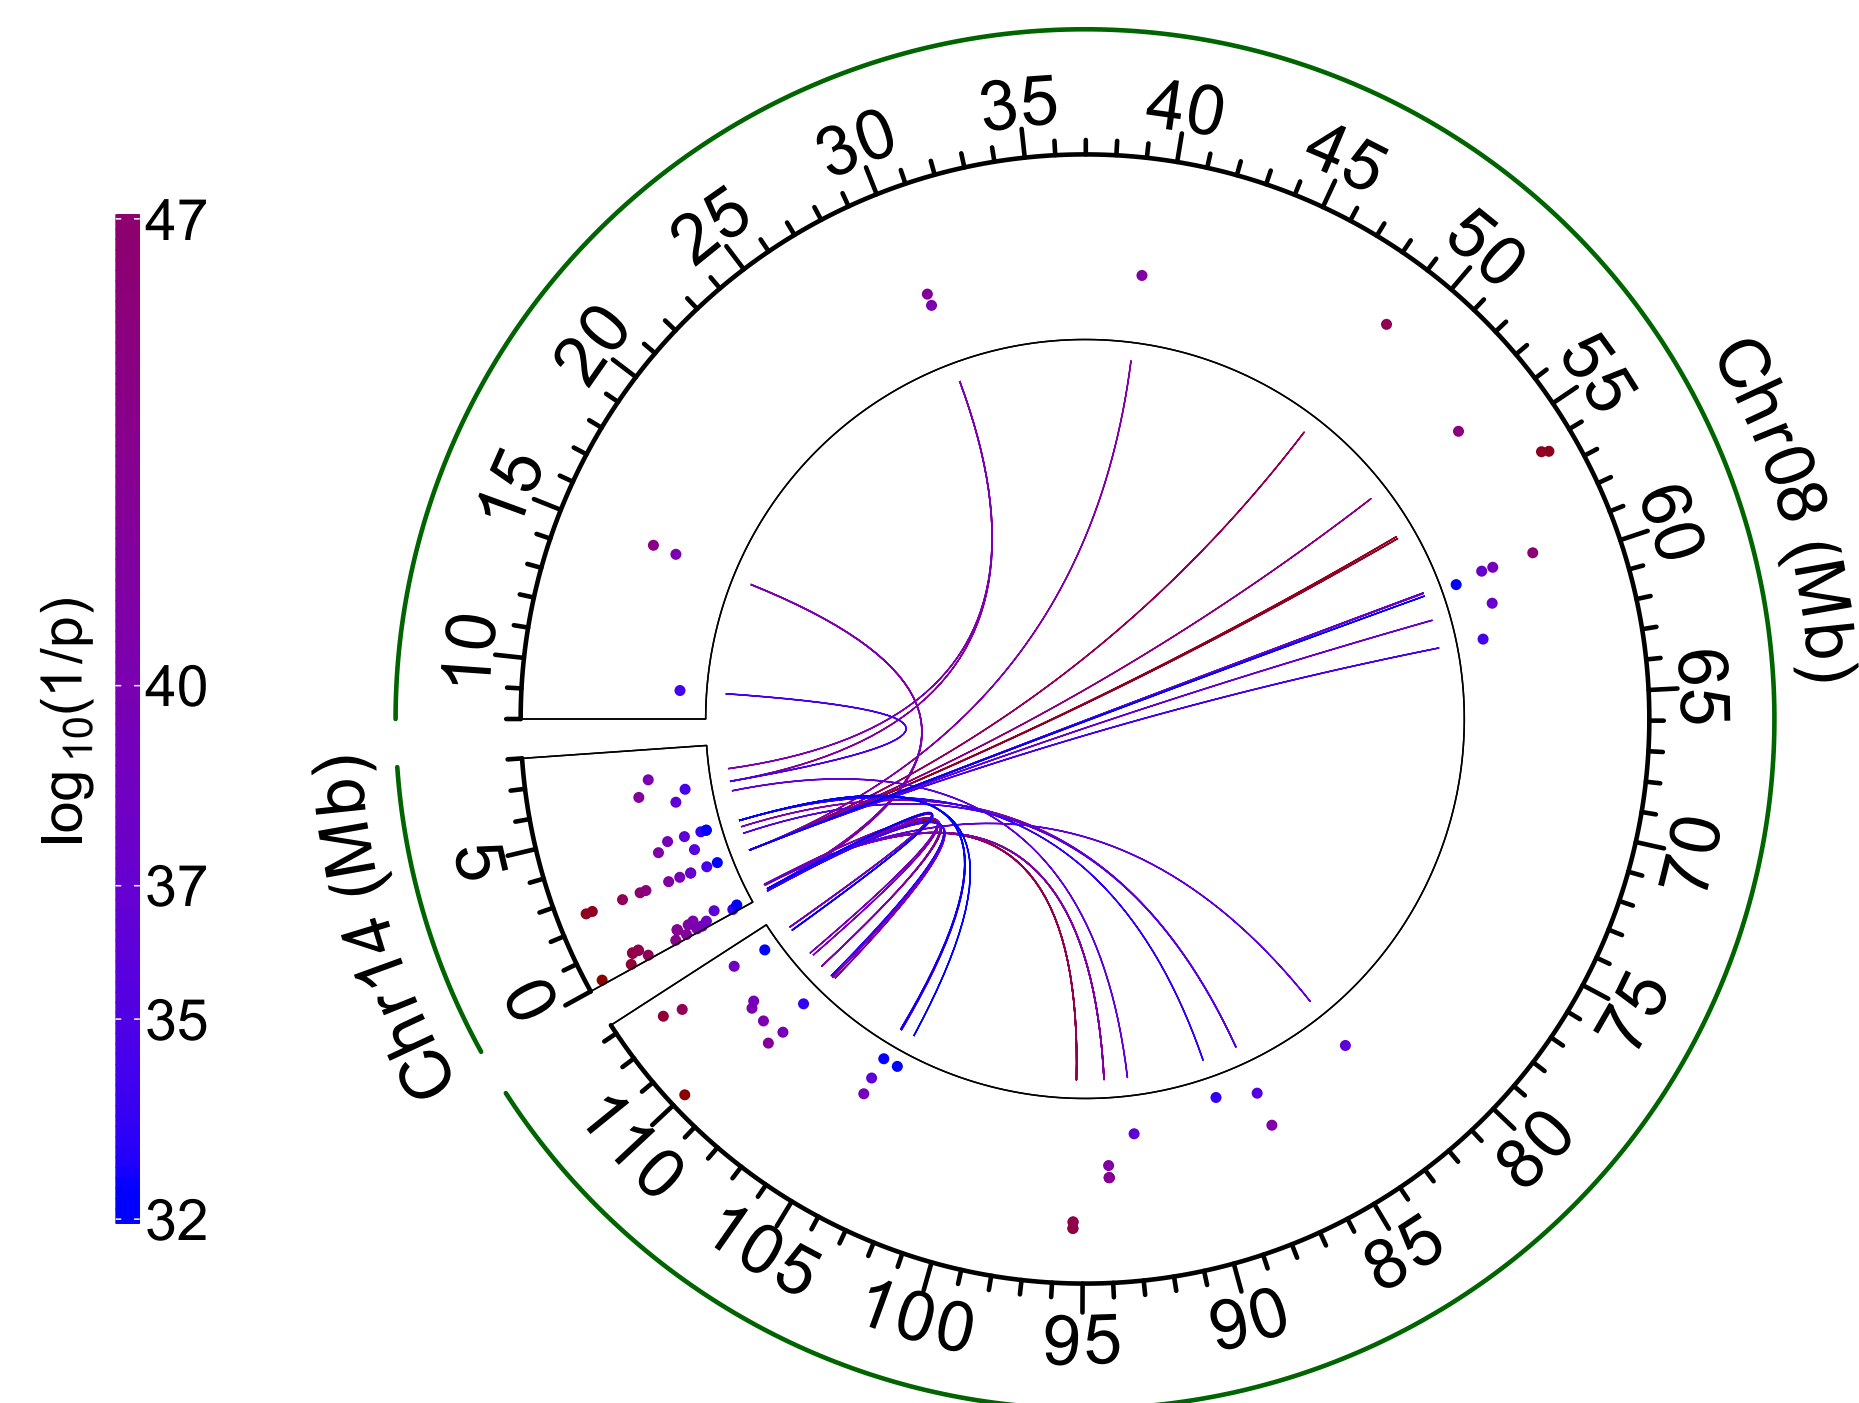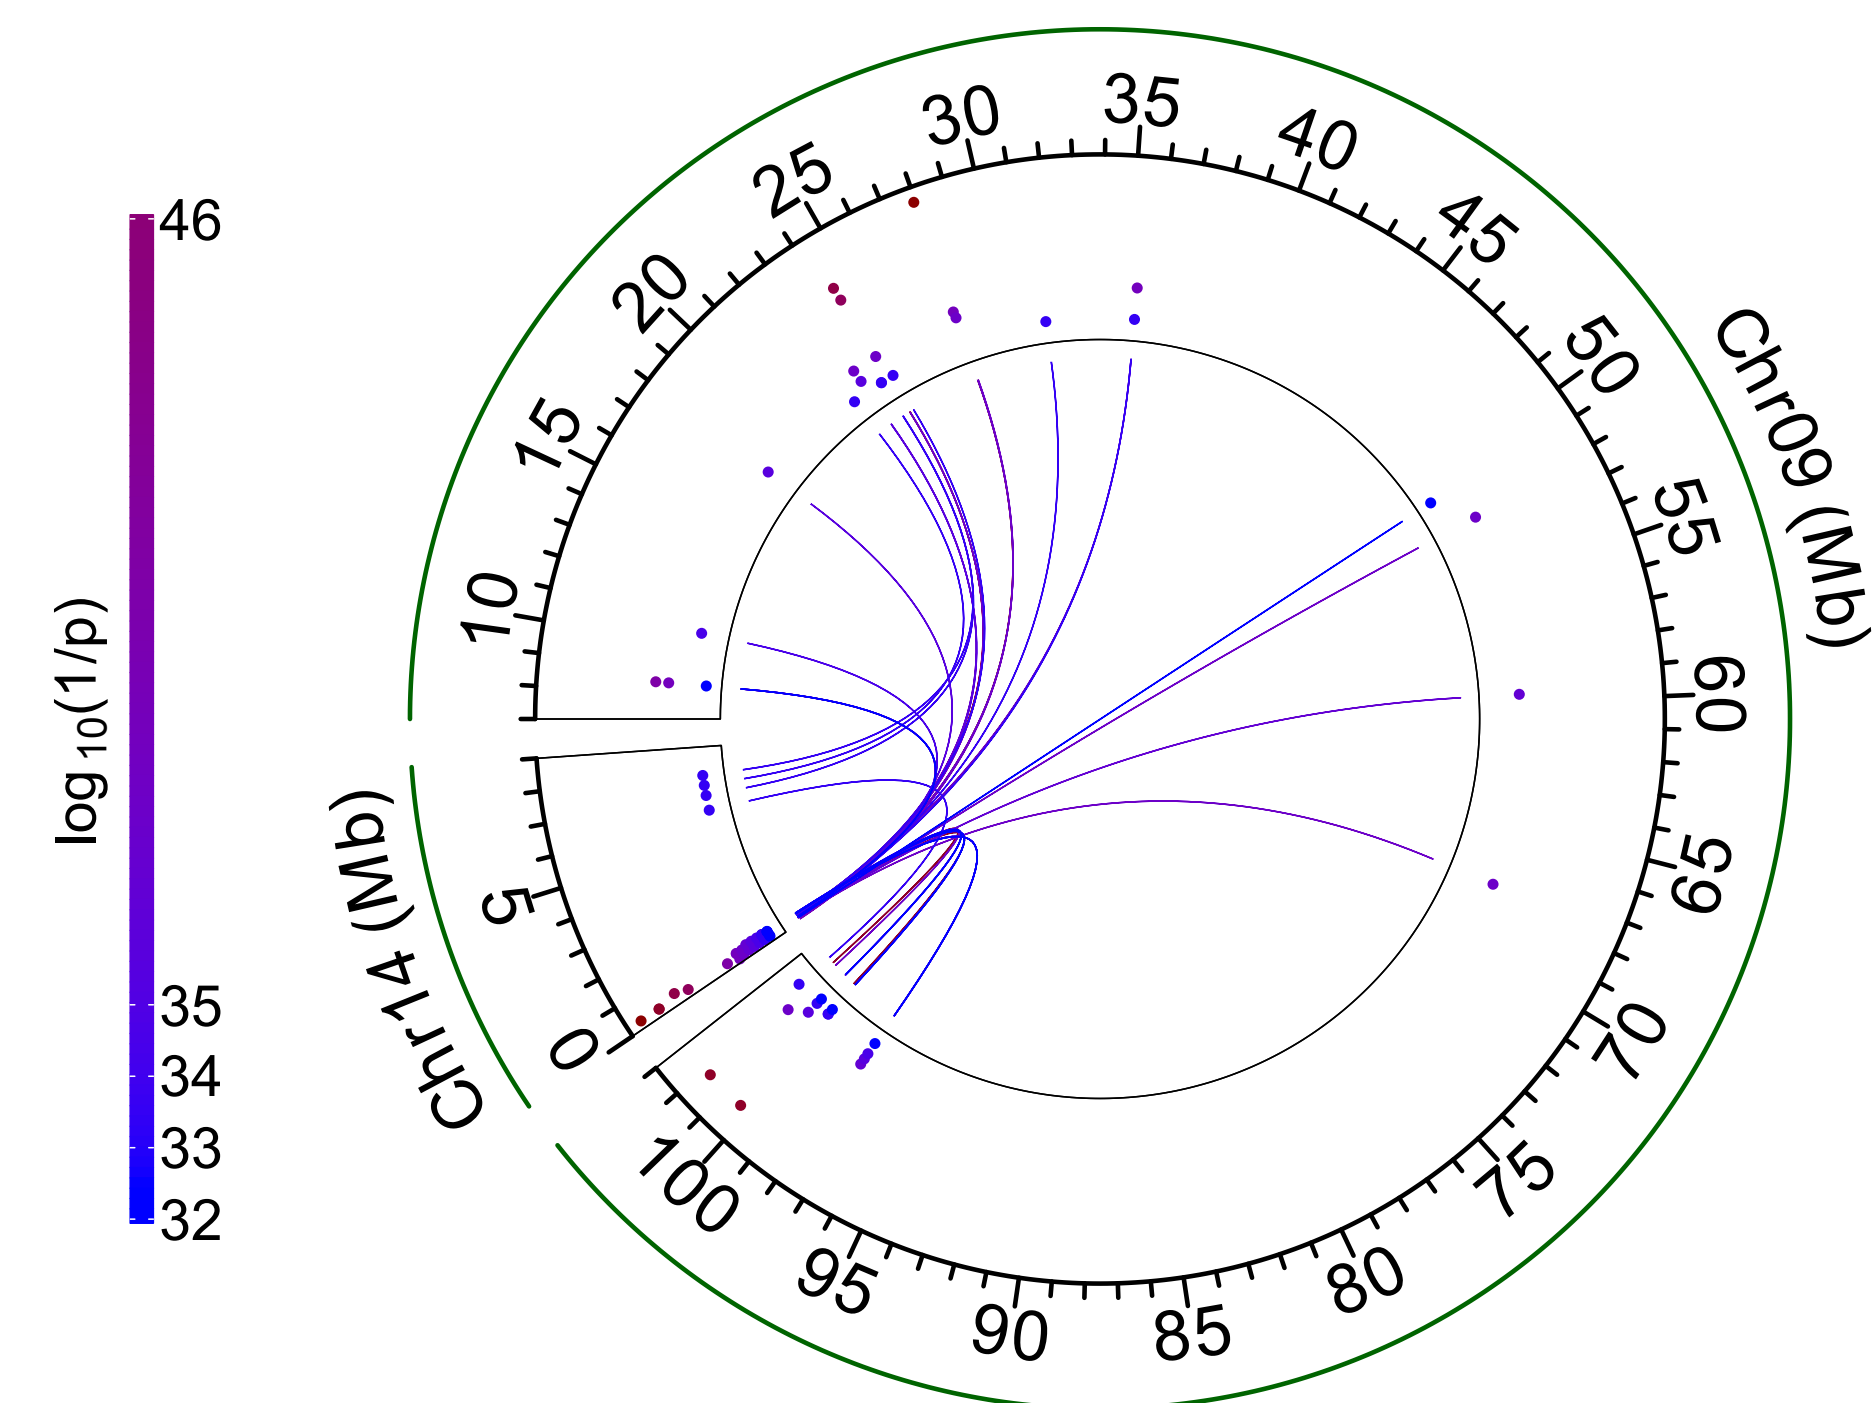

× AxA effect

× AxA effect

× AxA effect

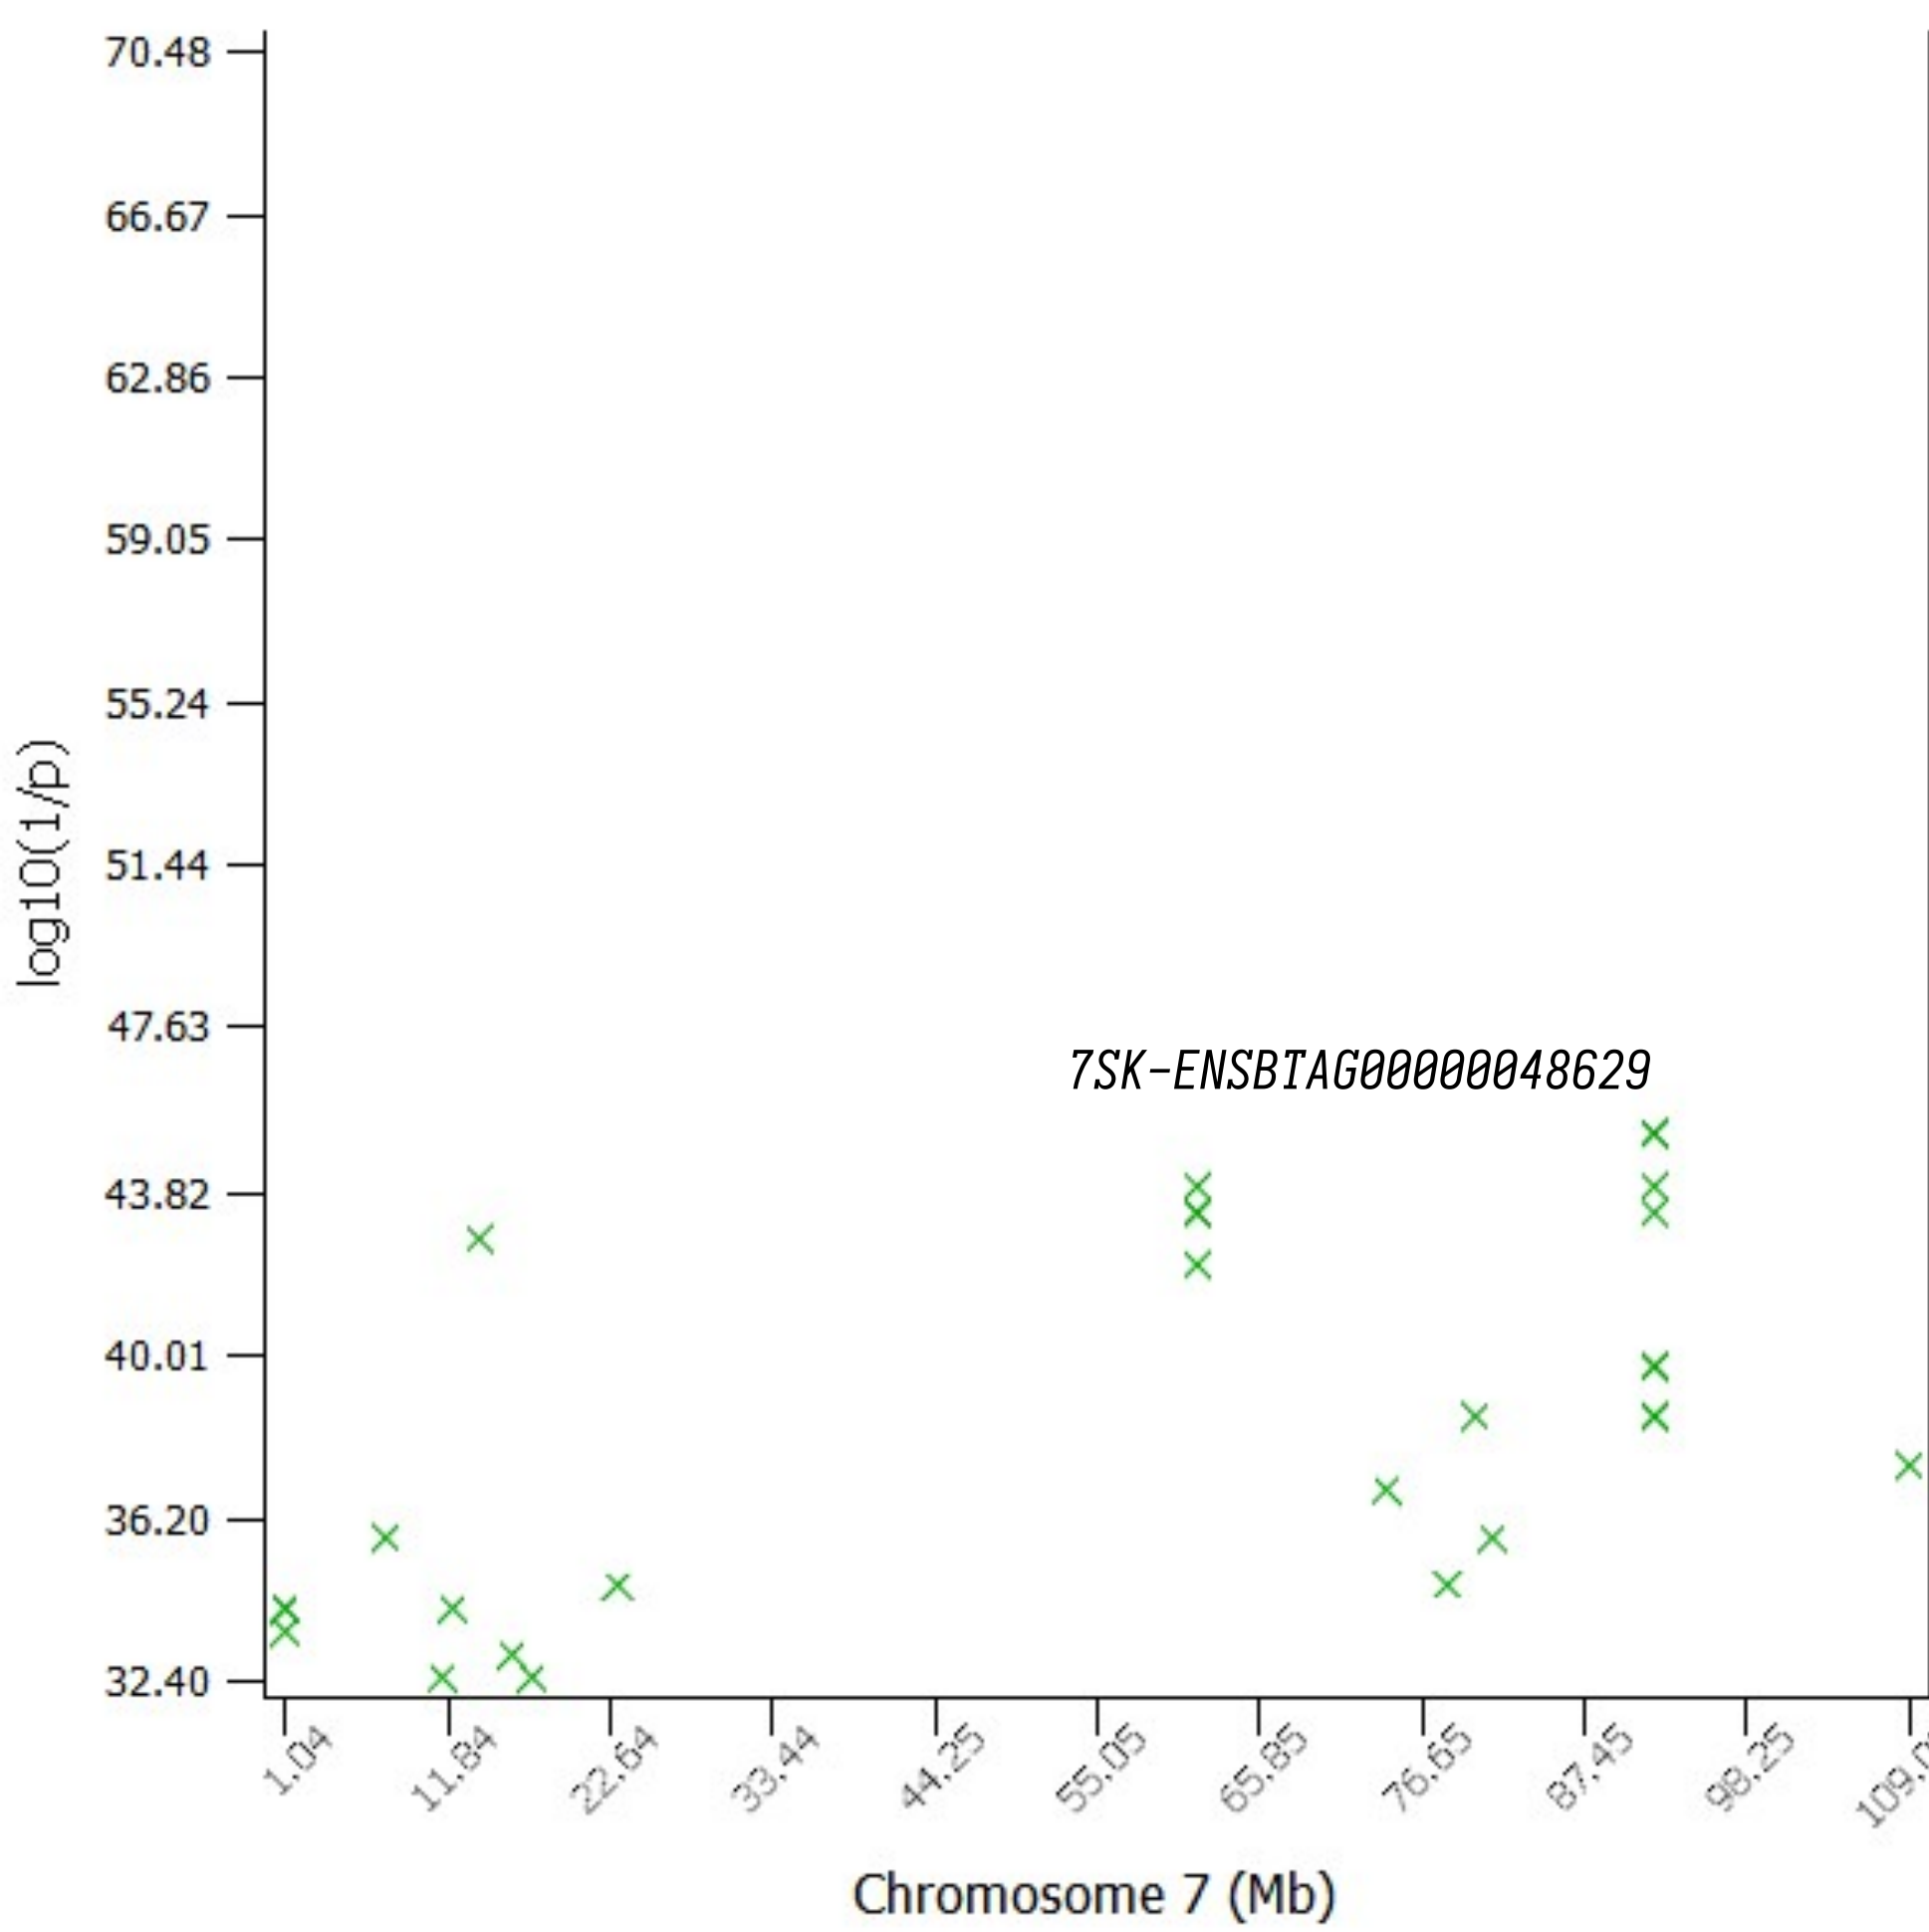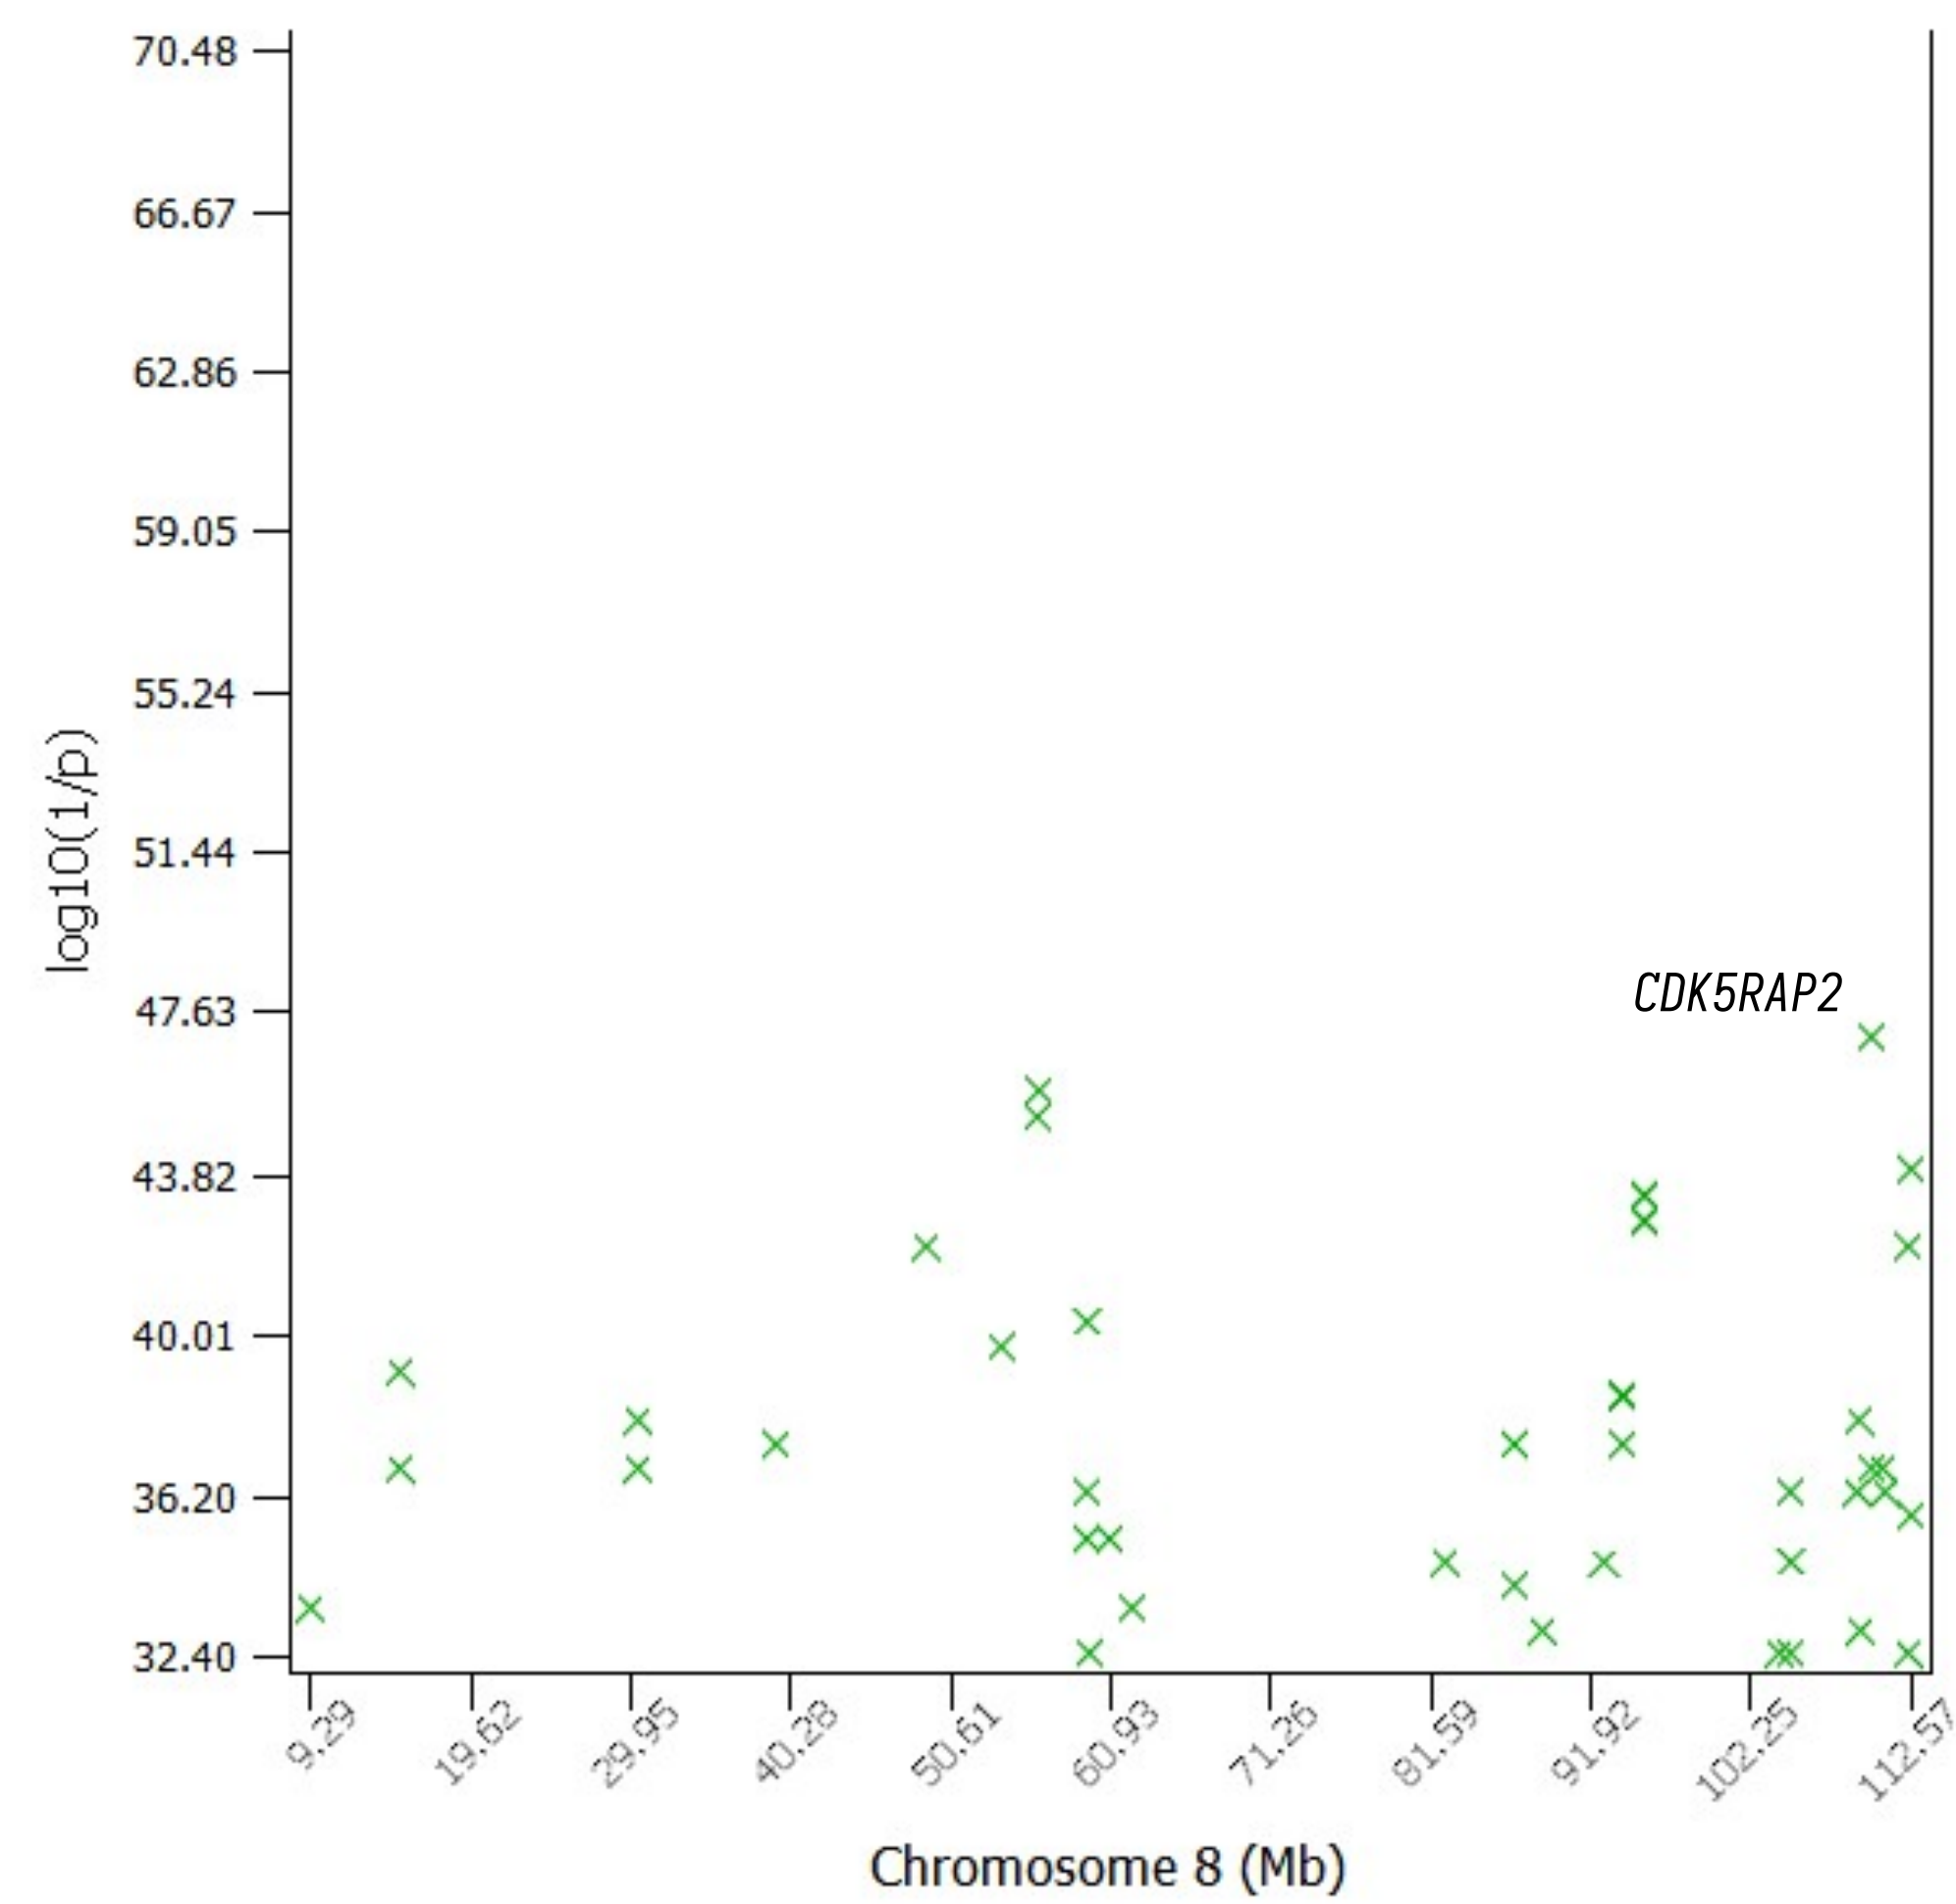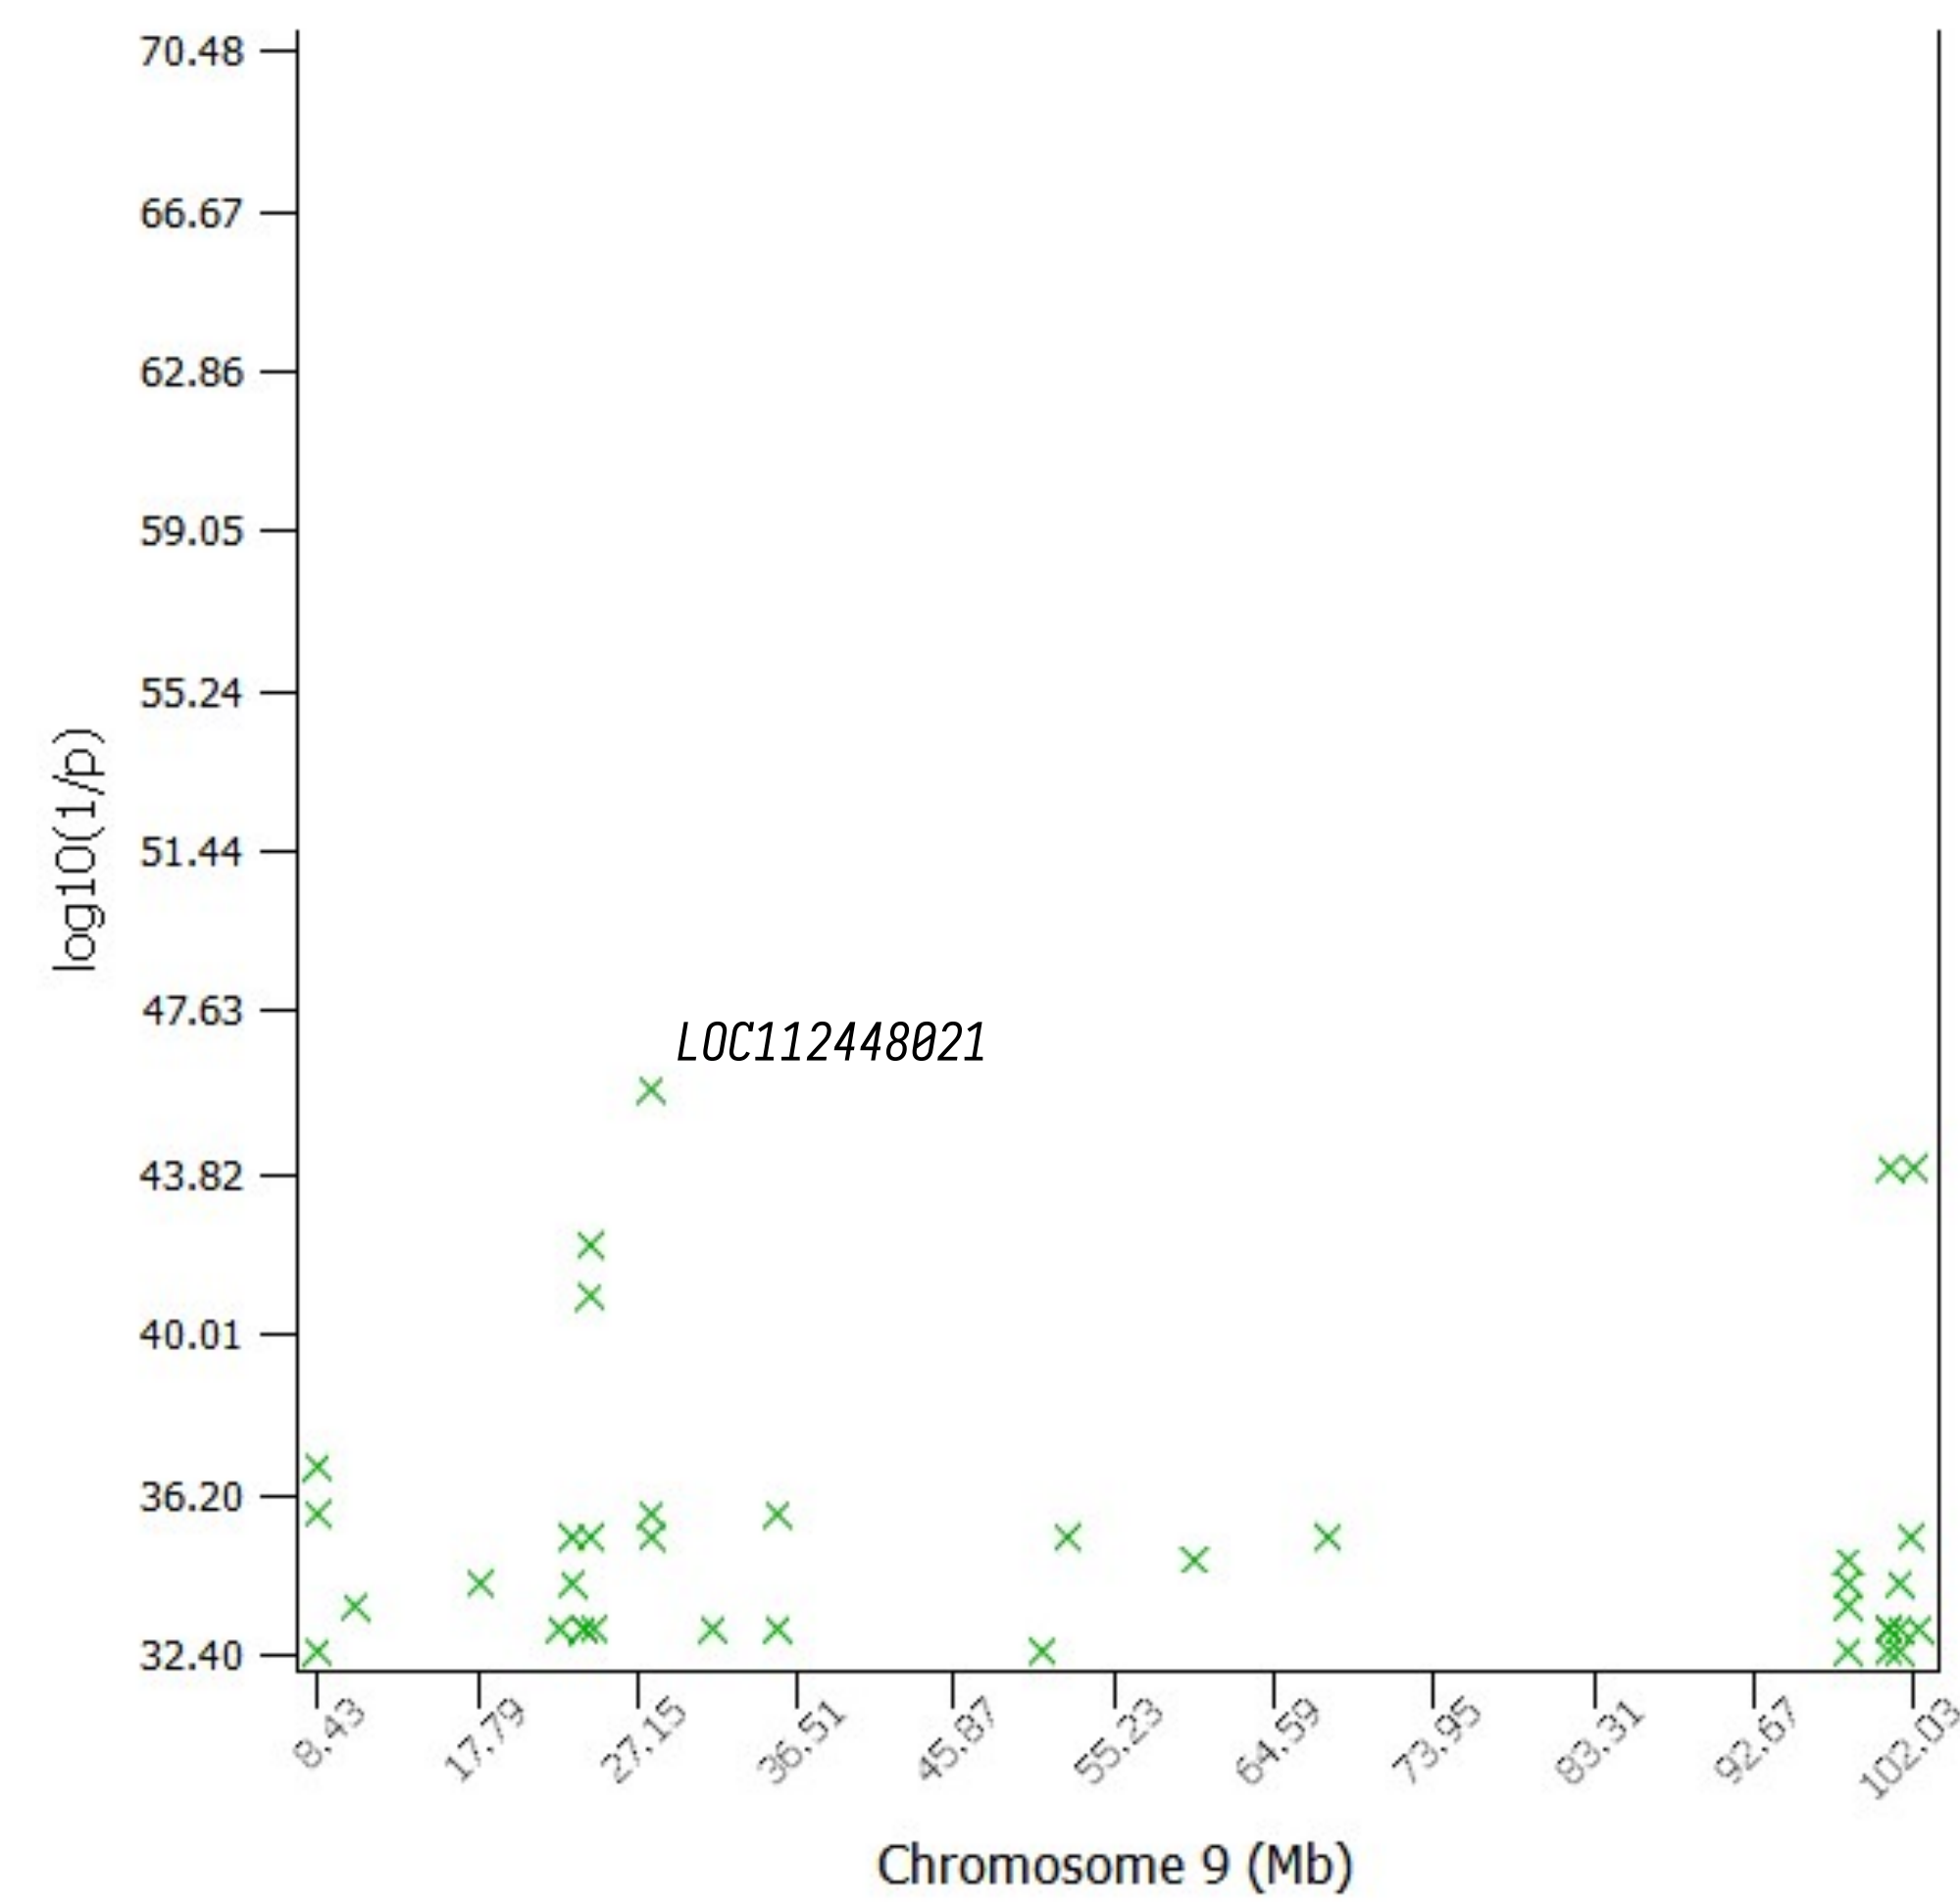



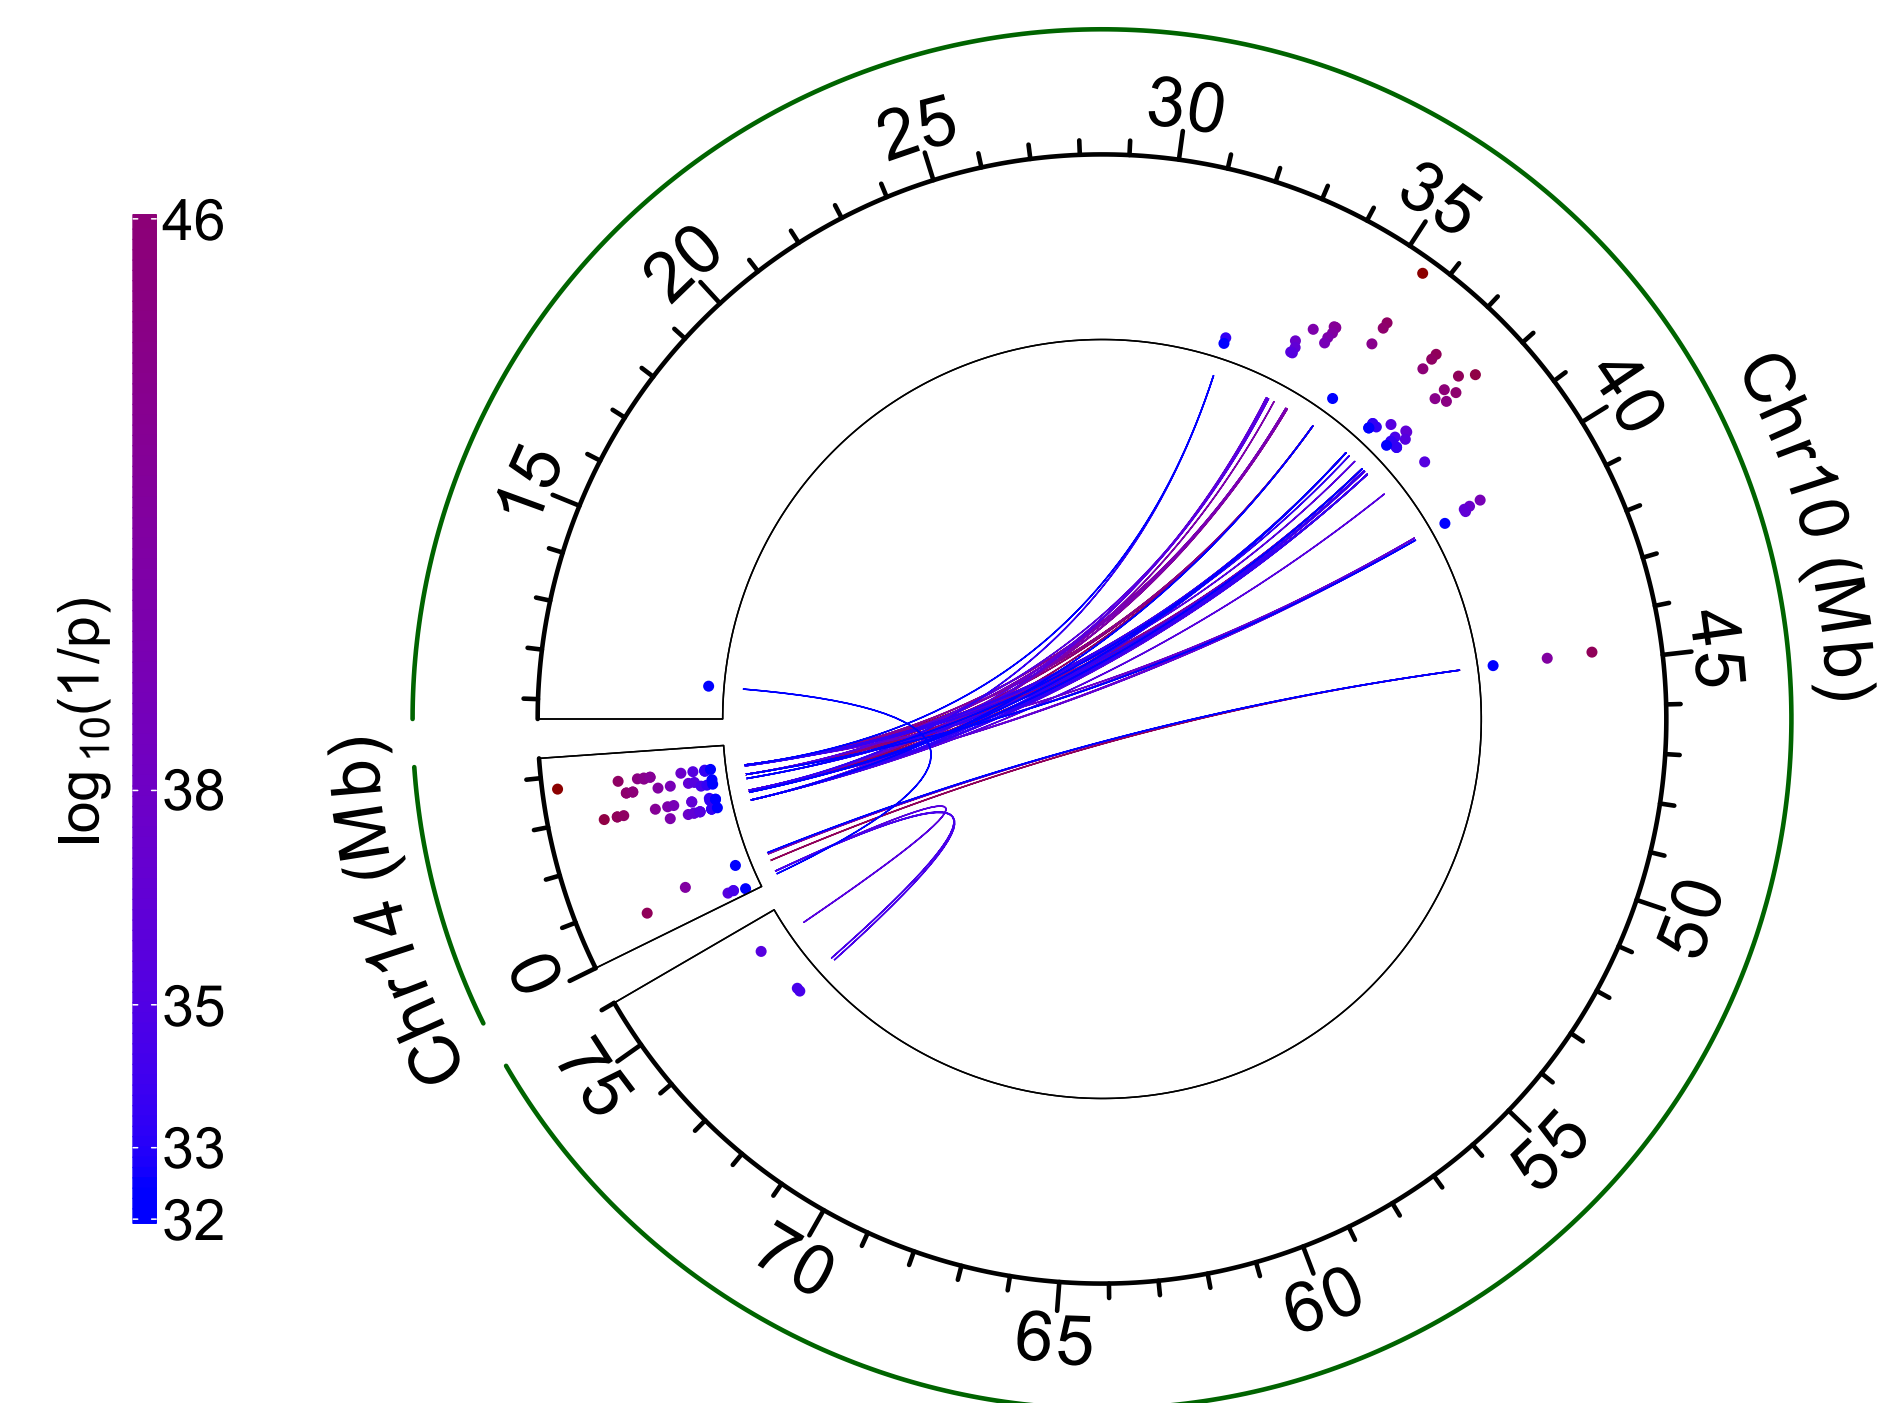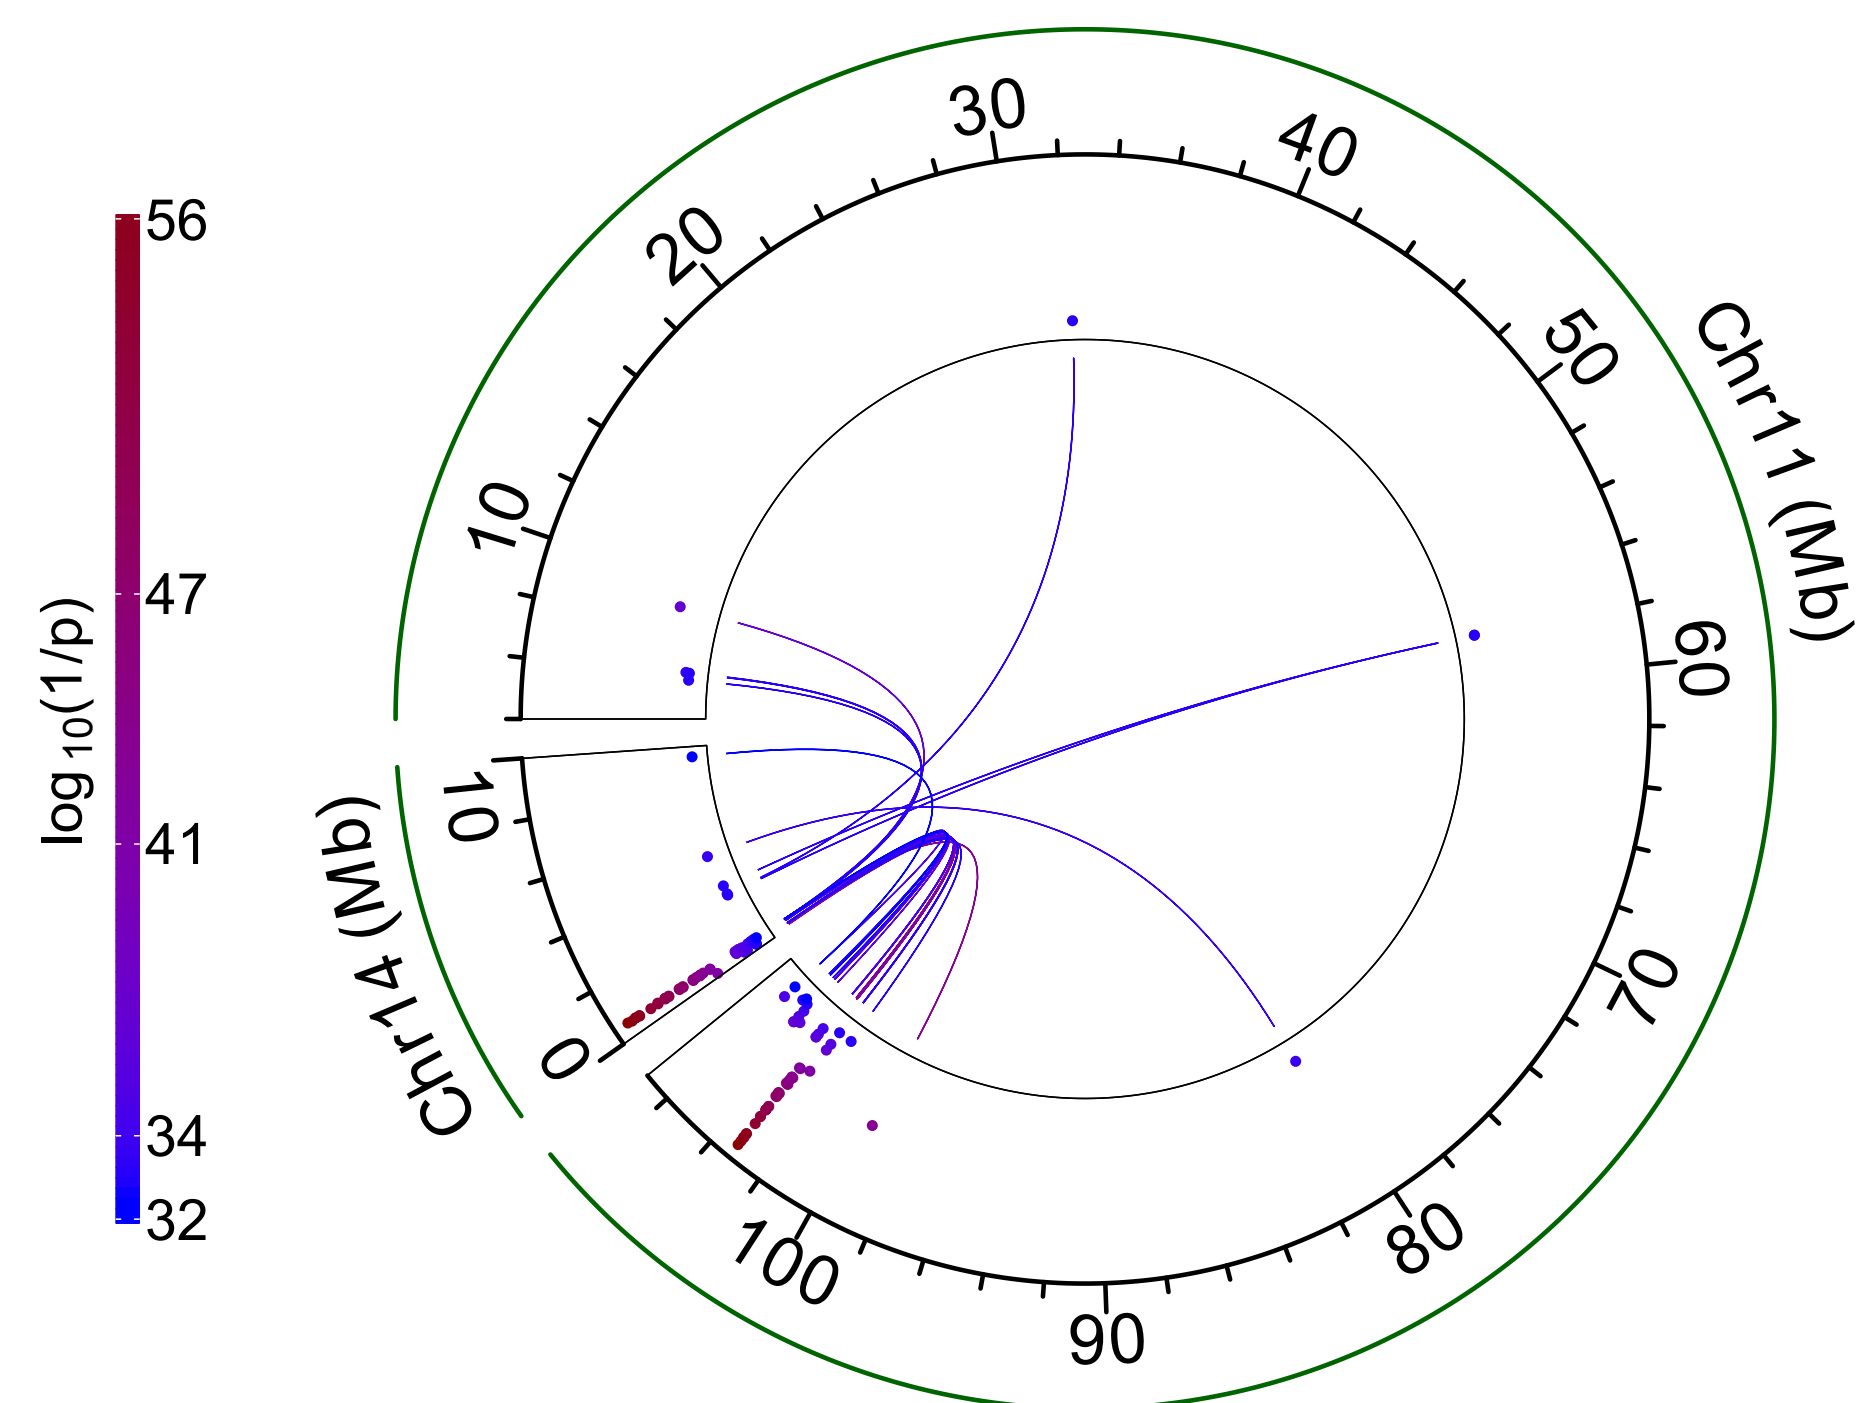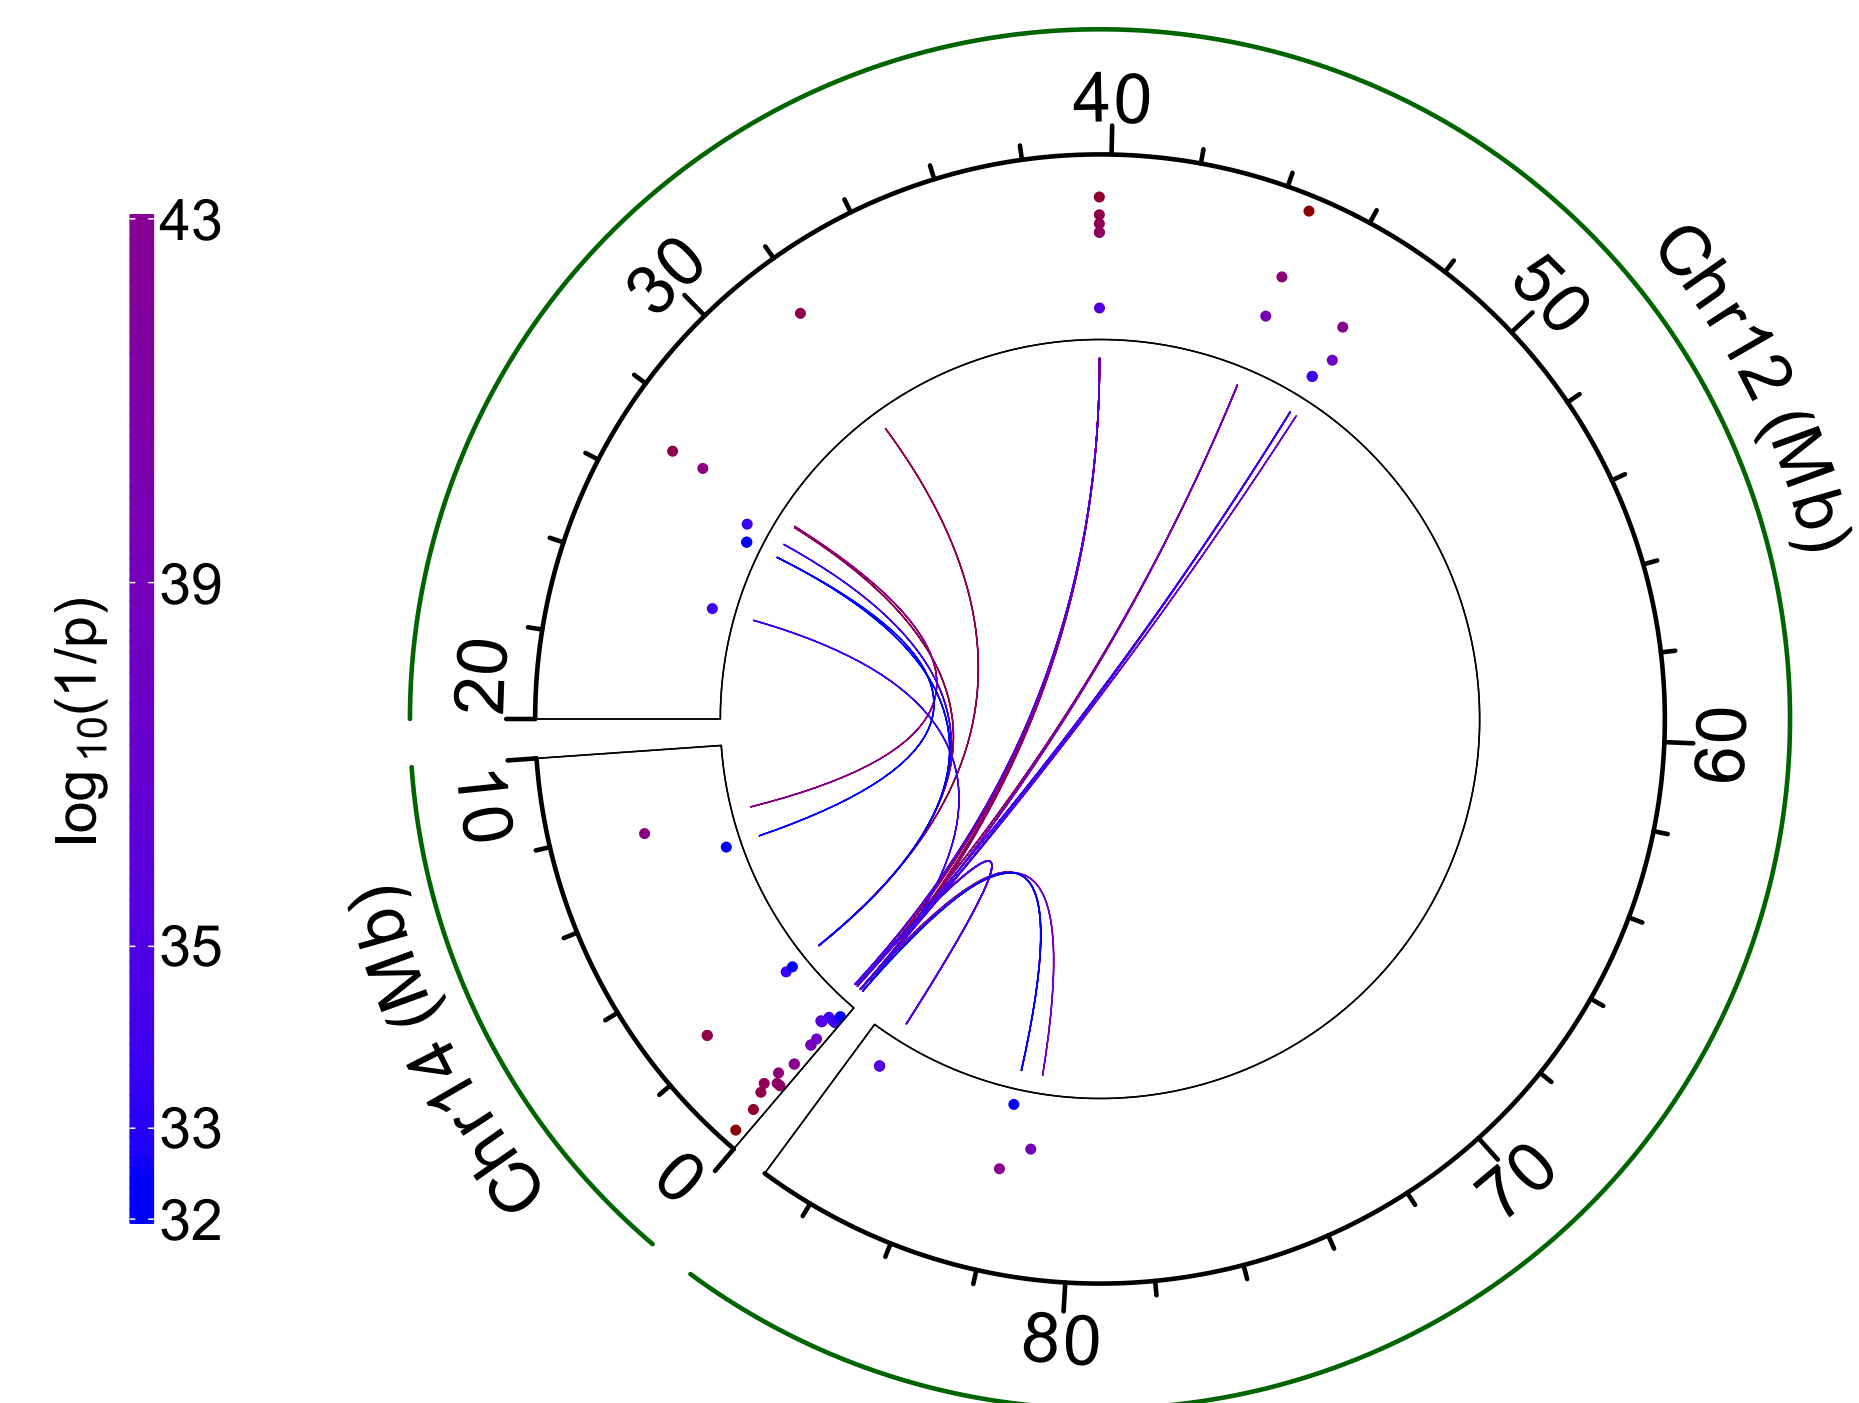

× AxA effect

× AxA effect

× AxA effect

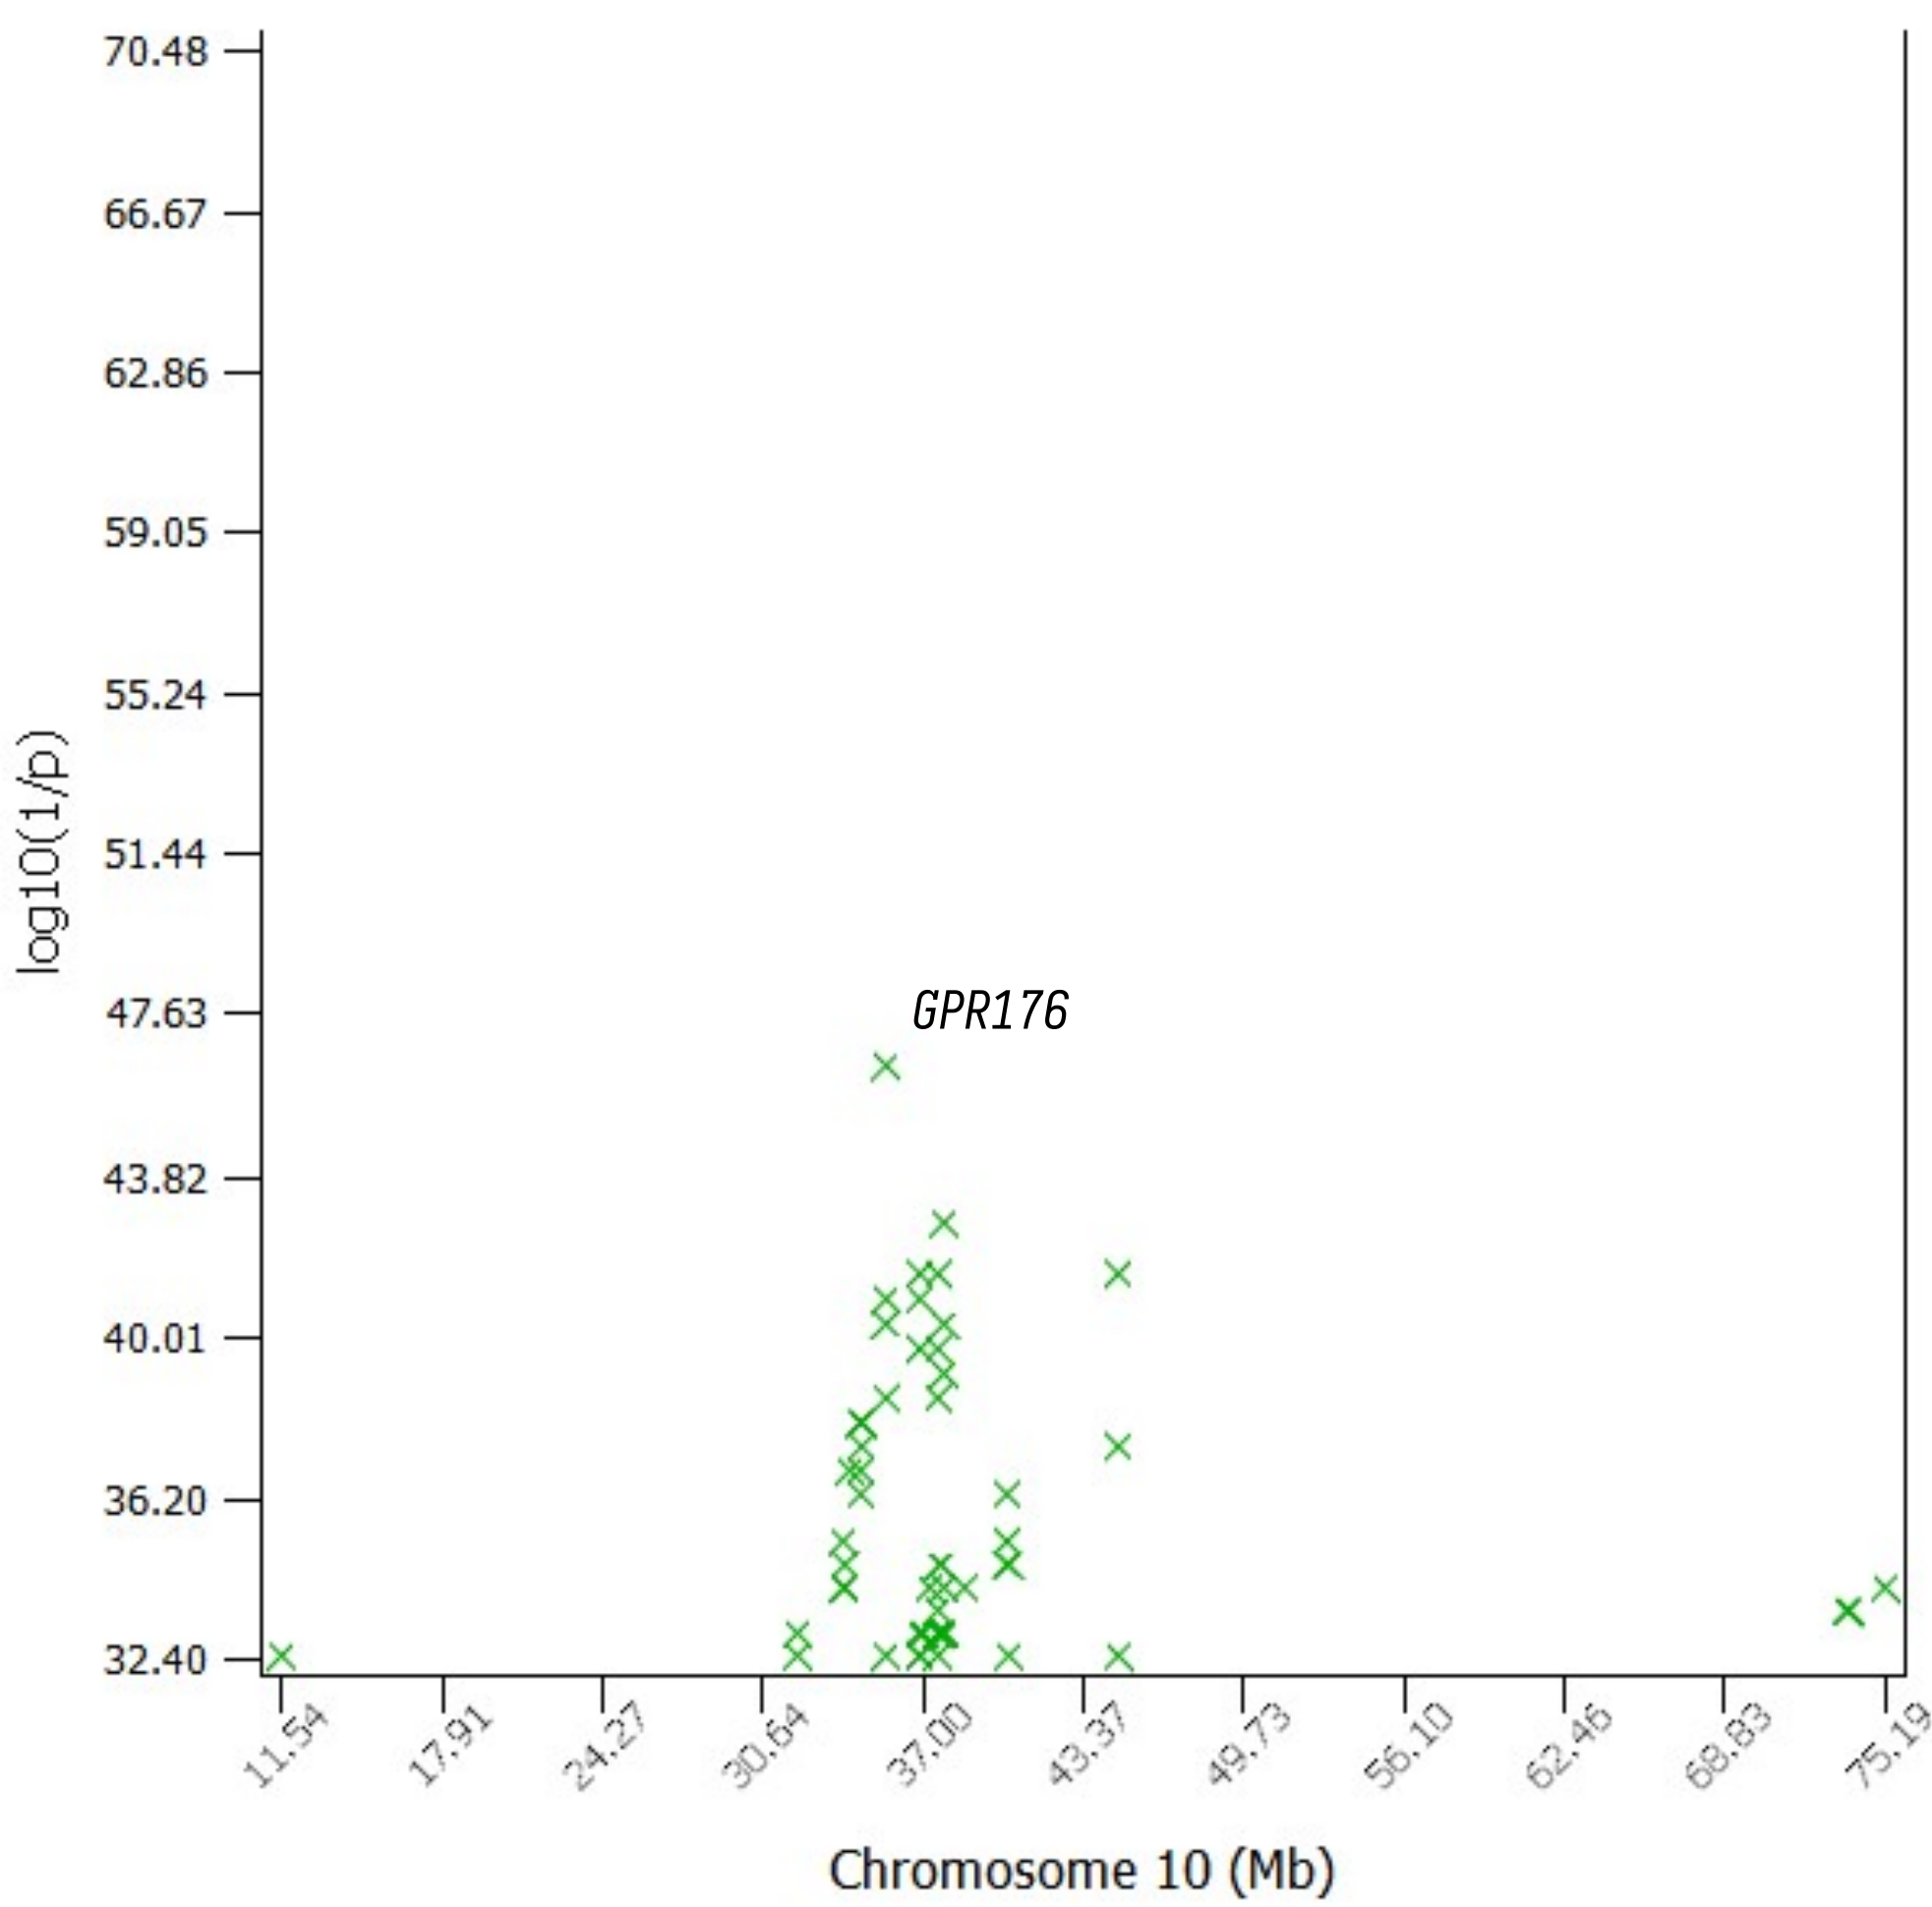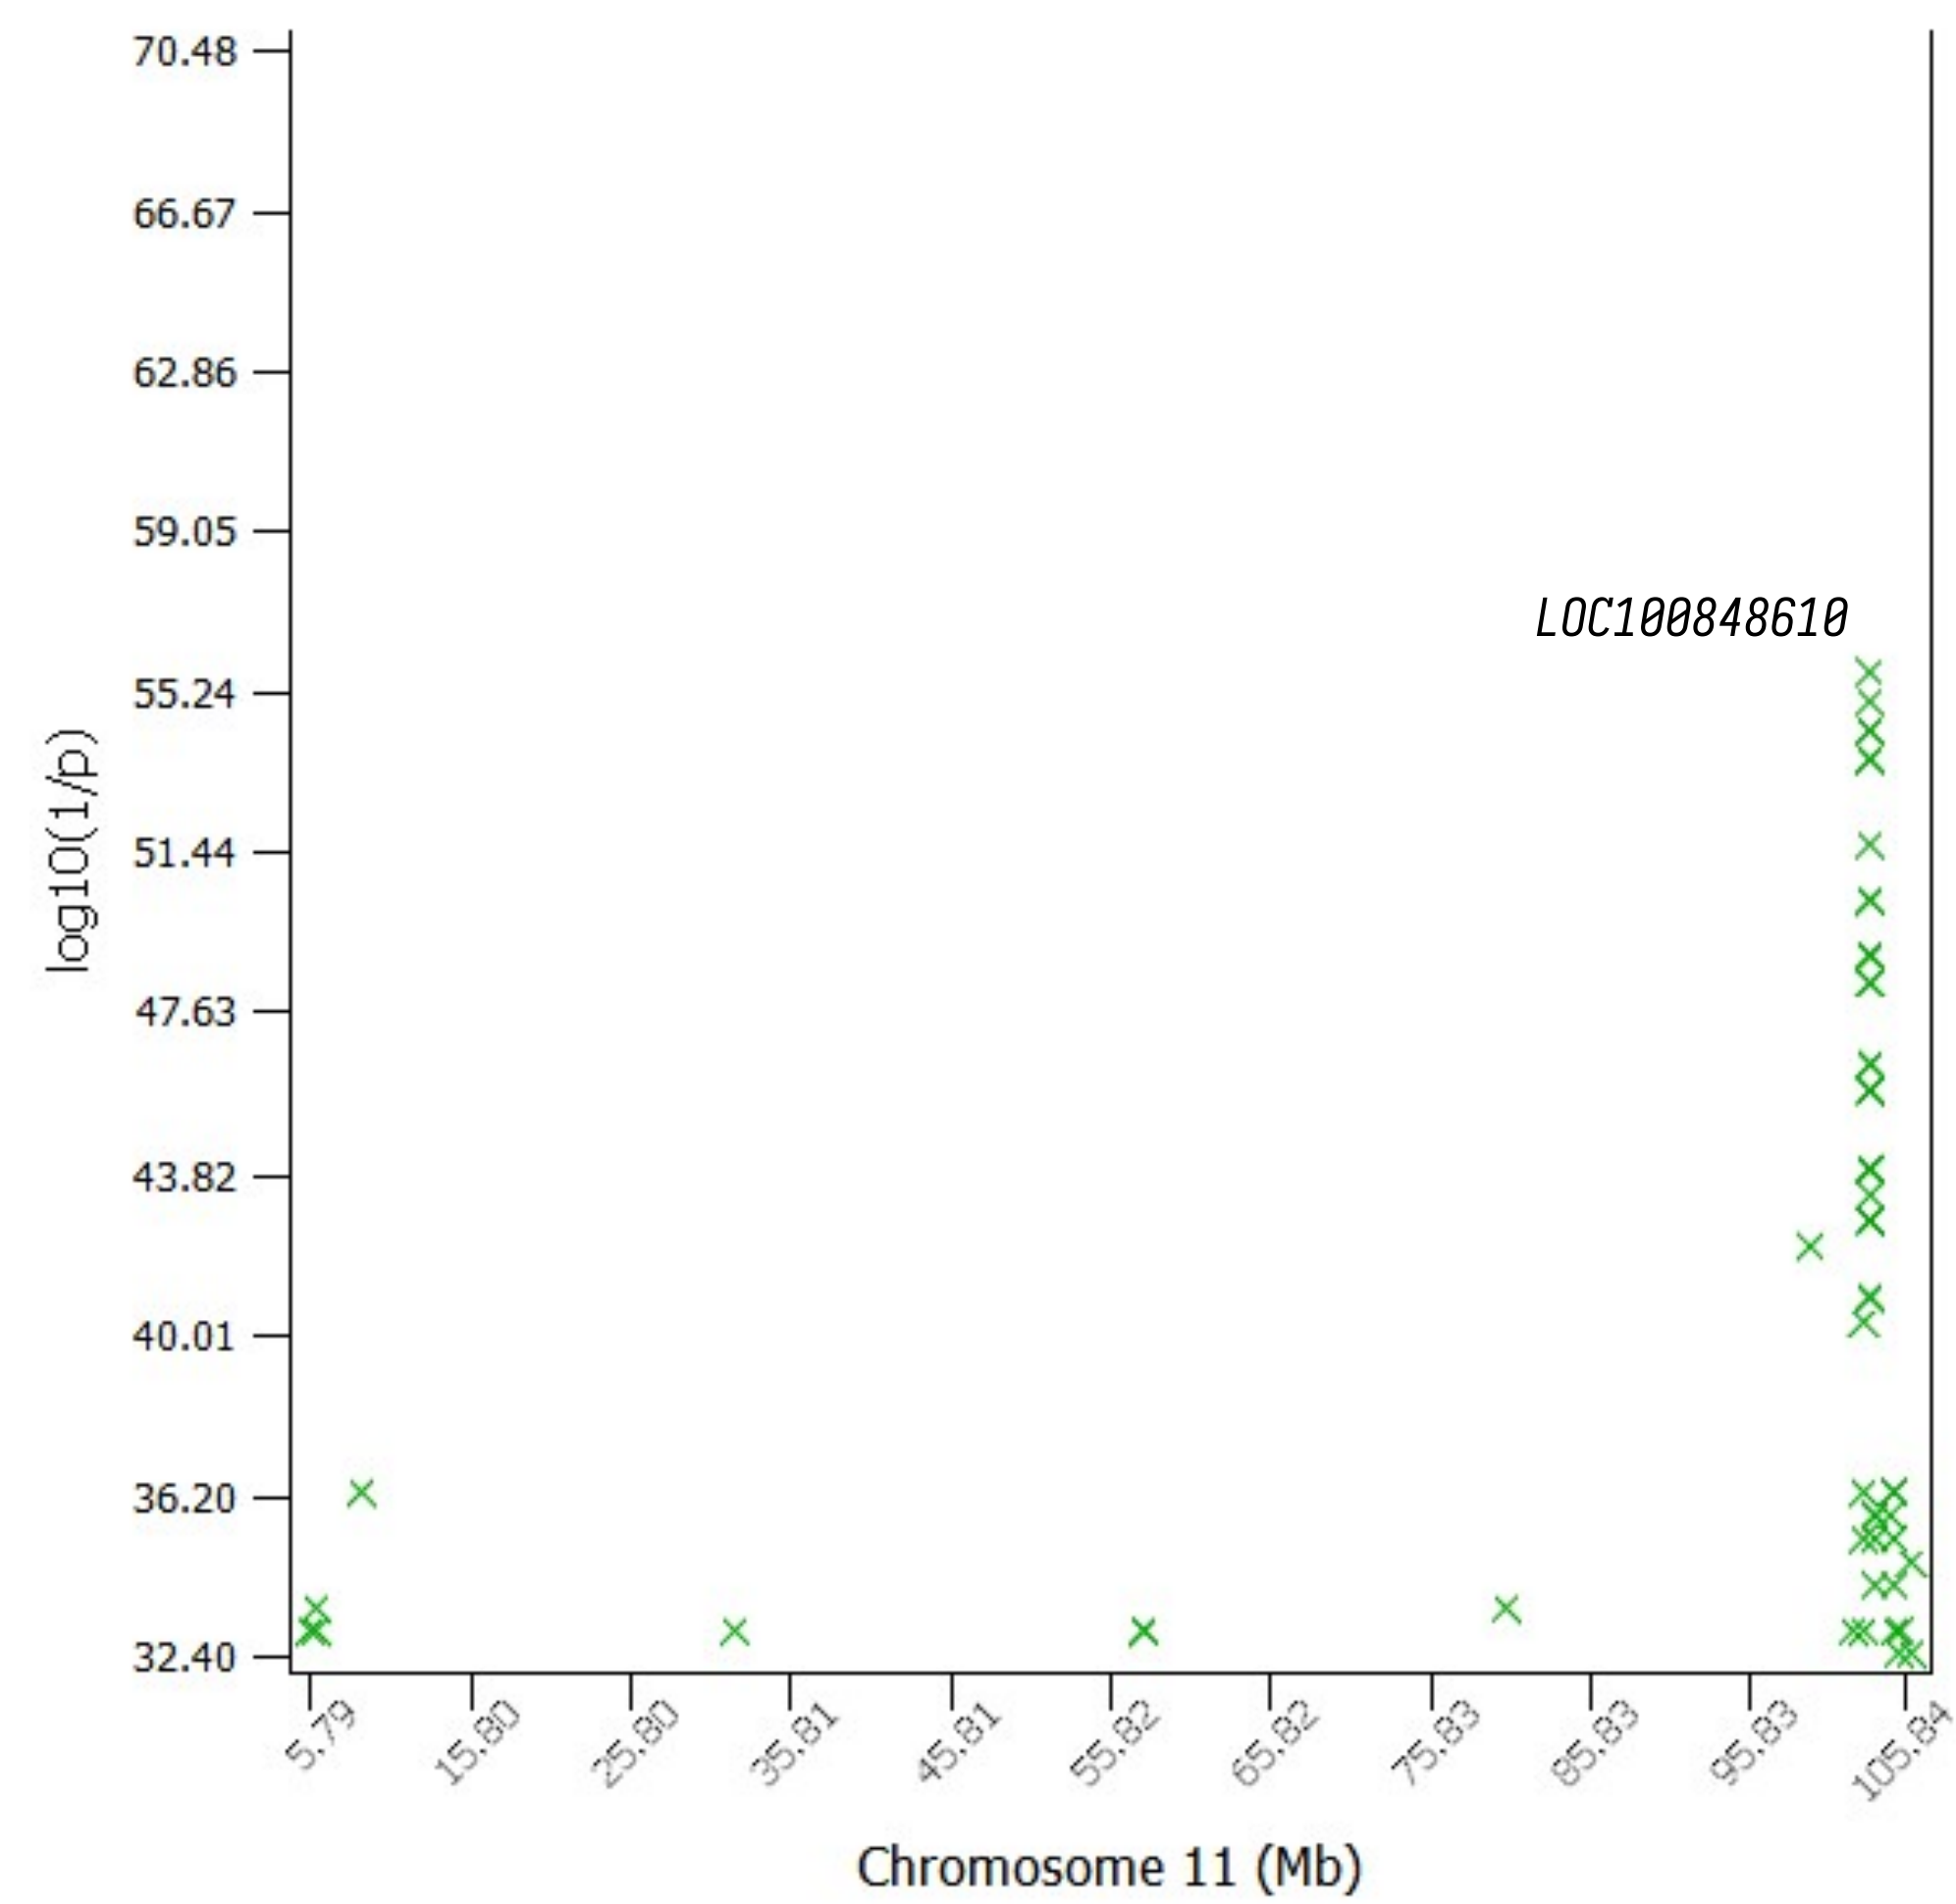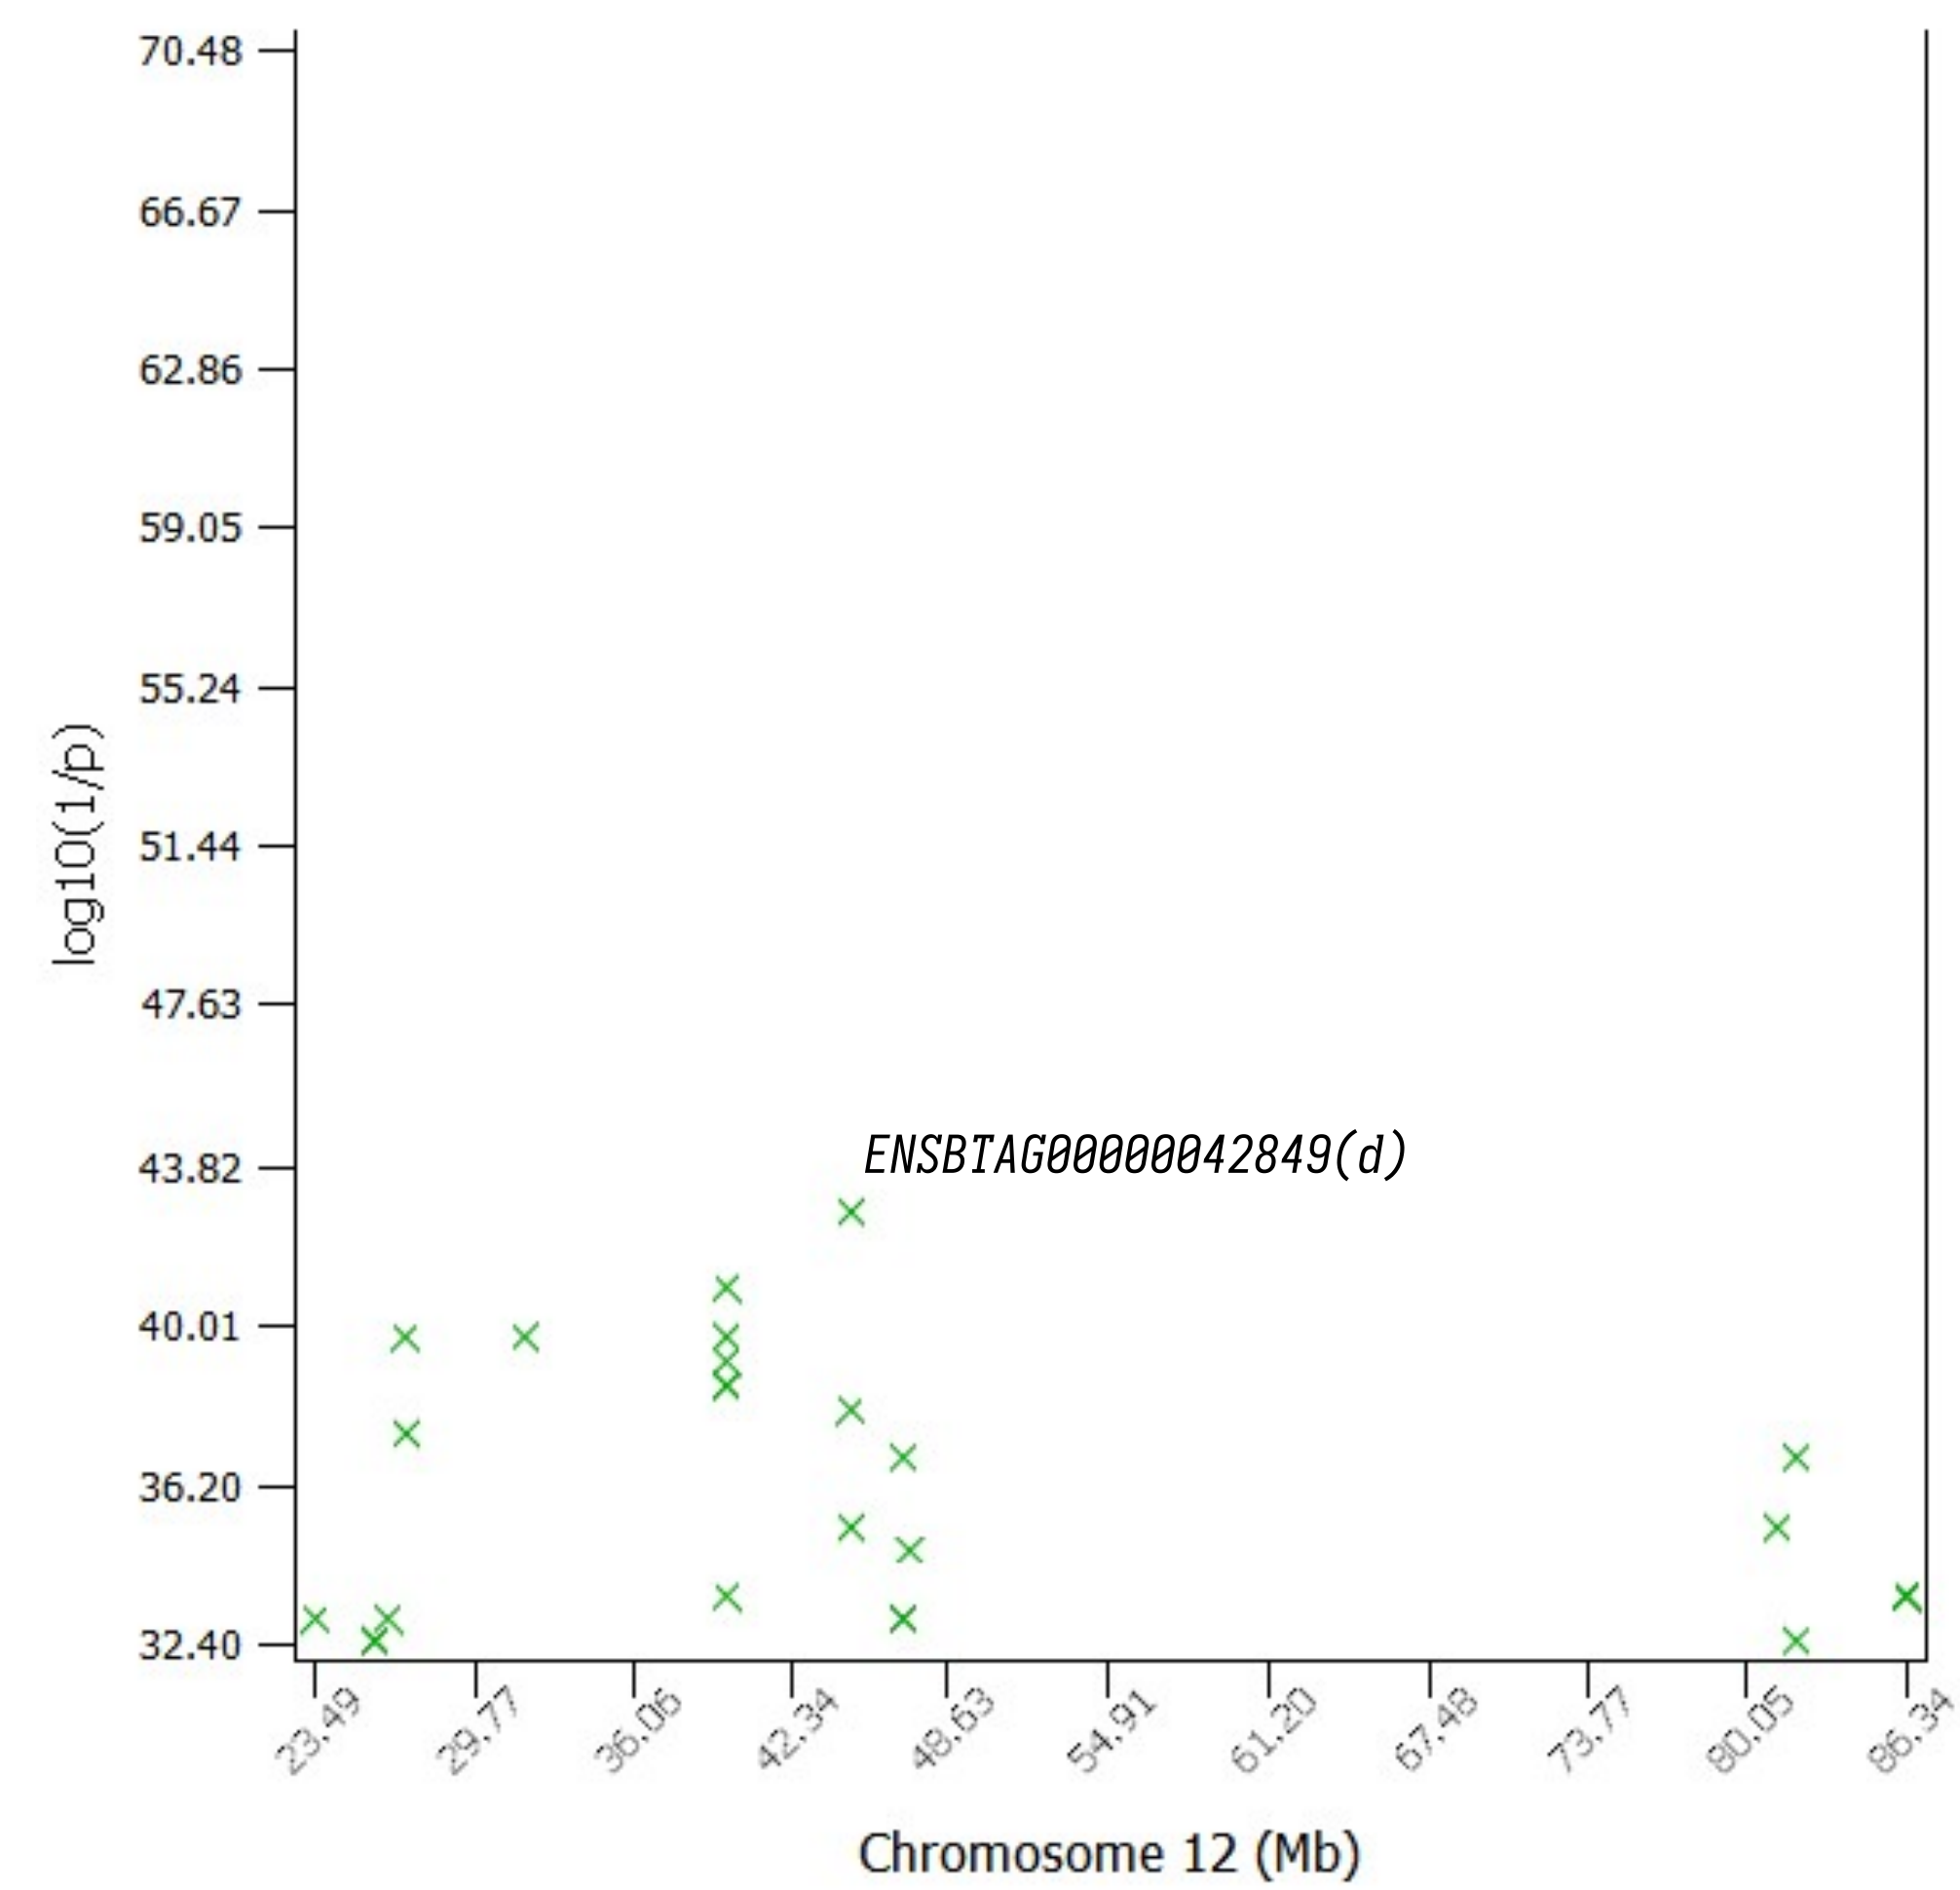



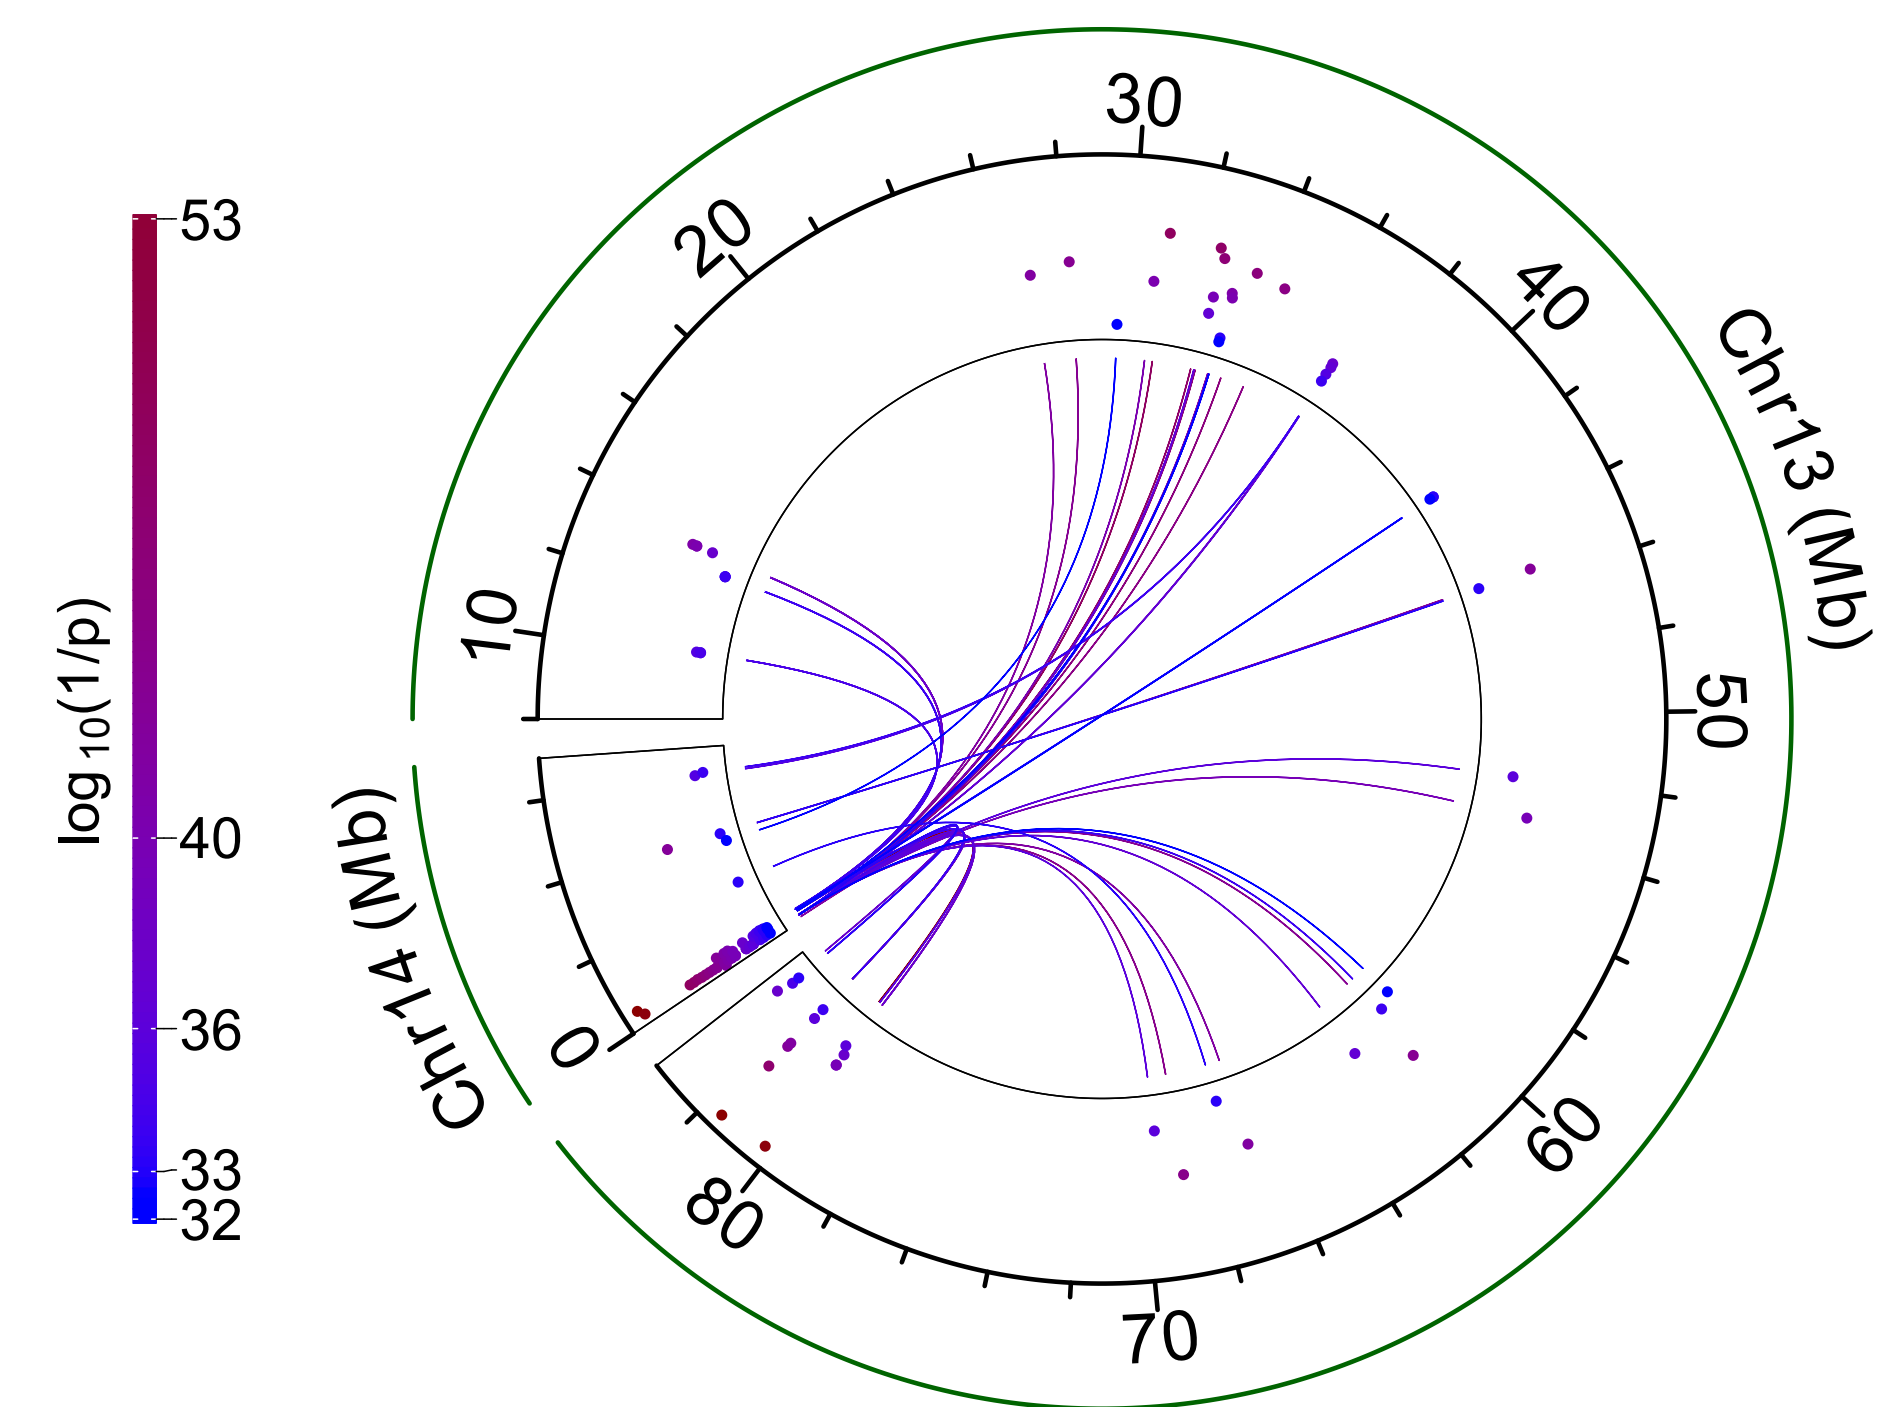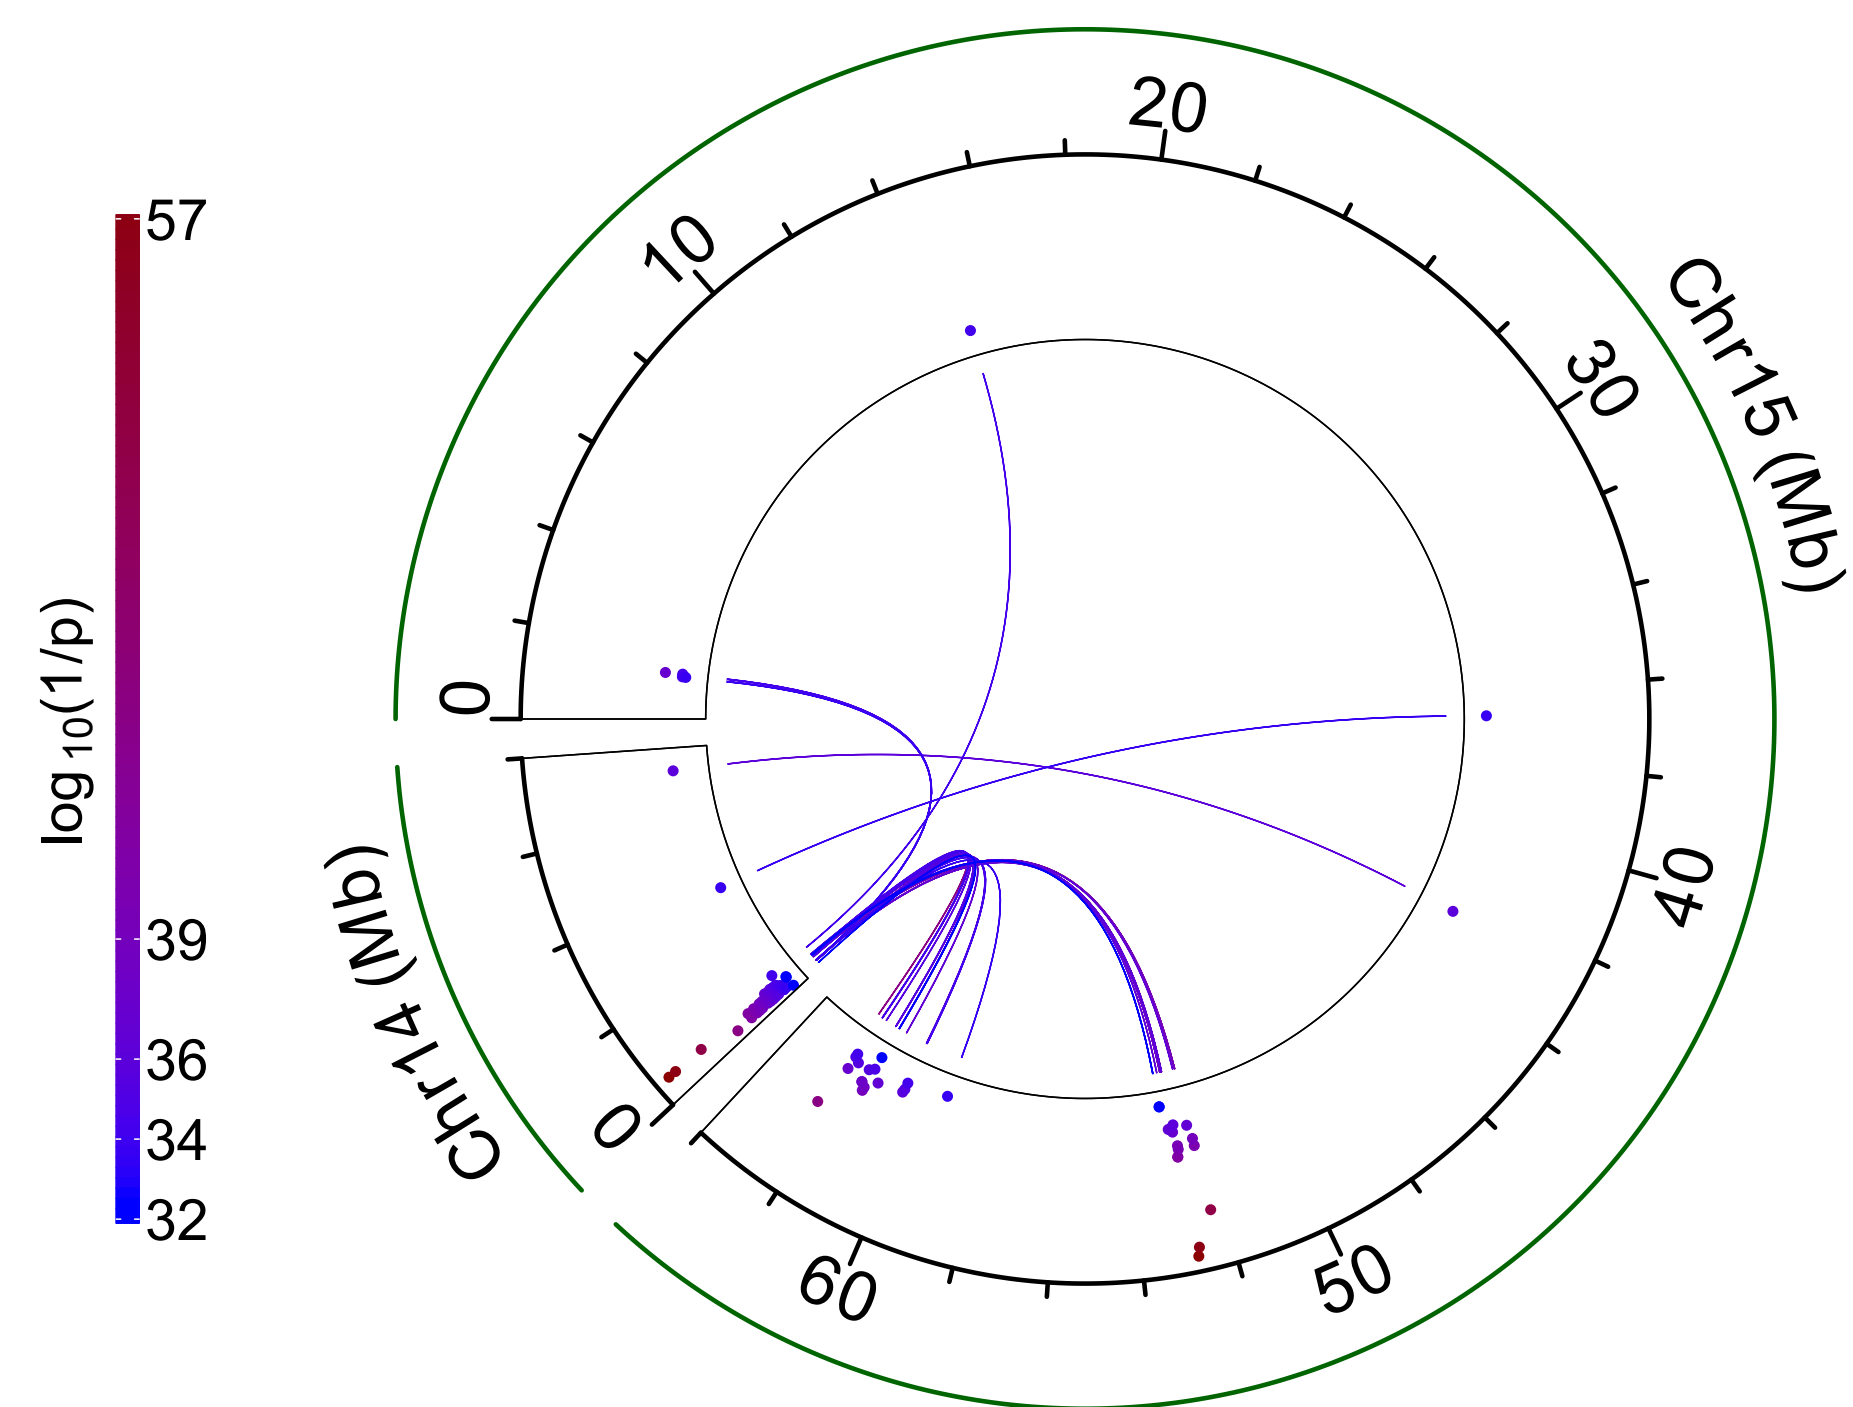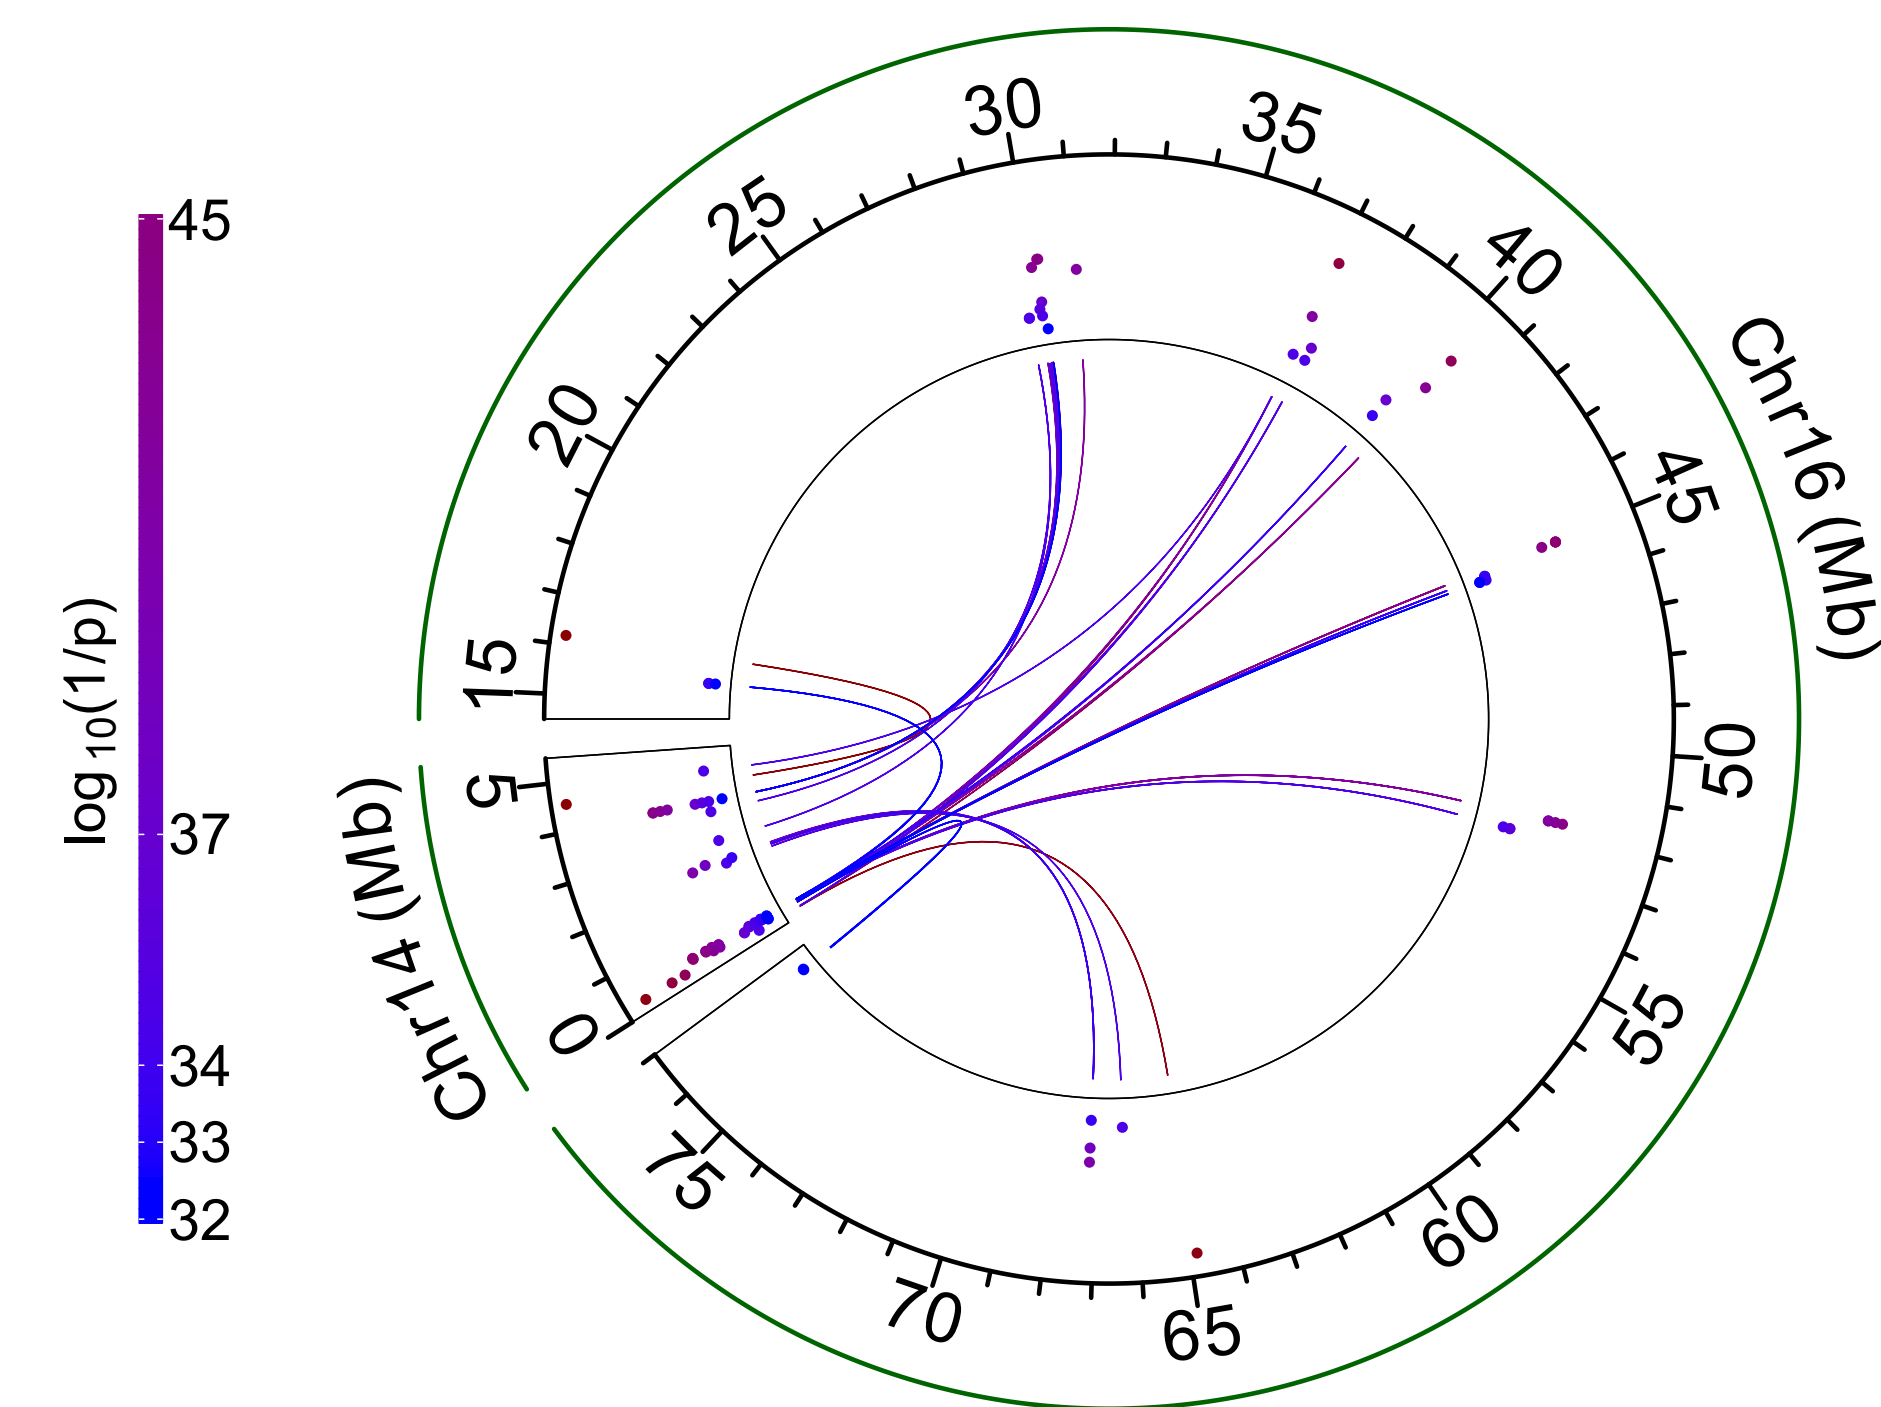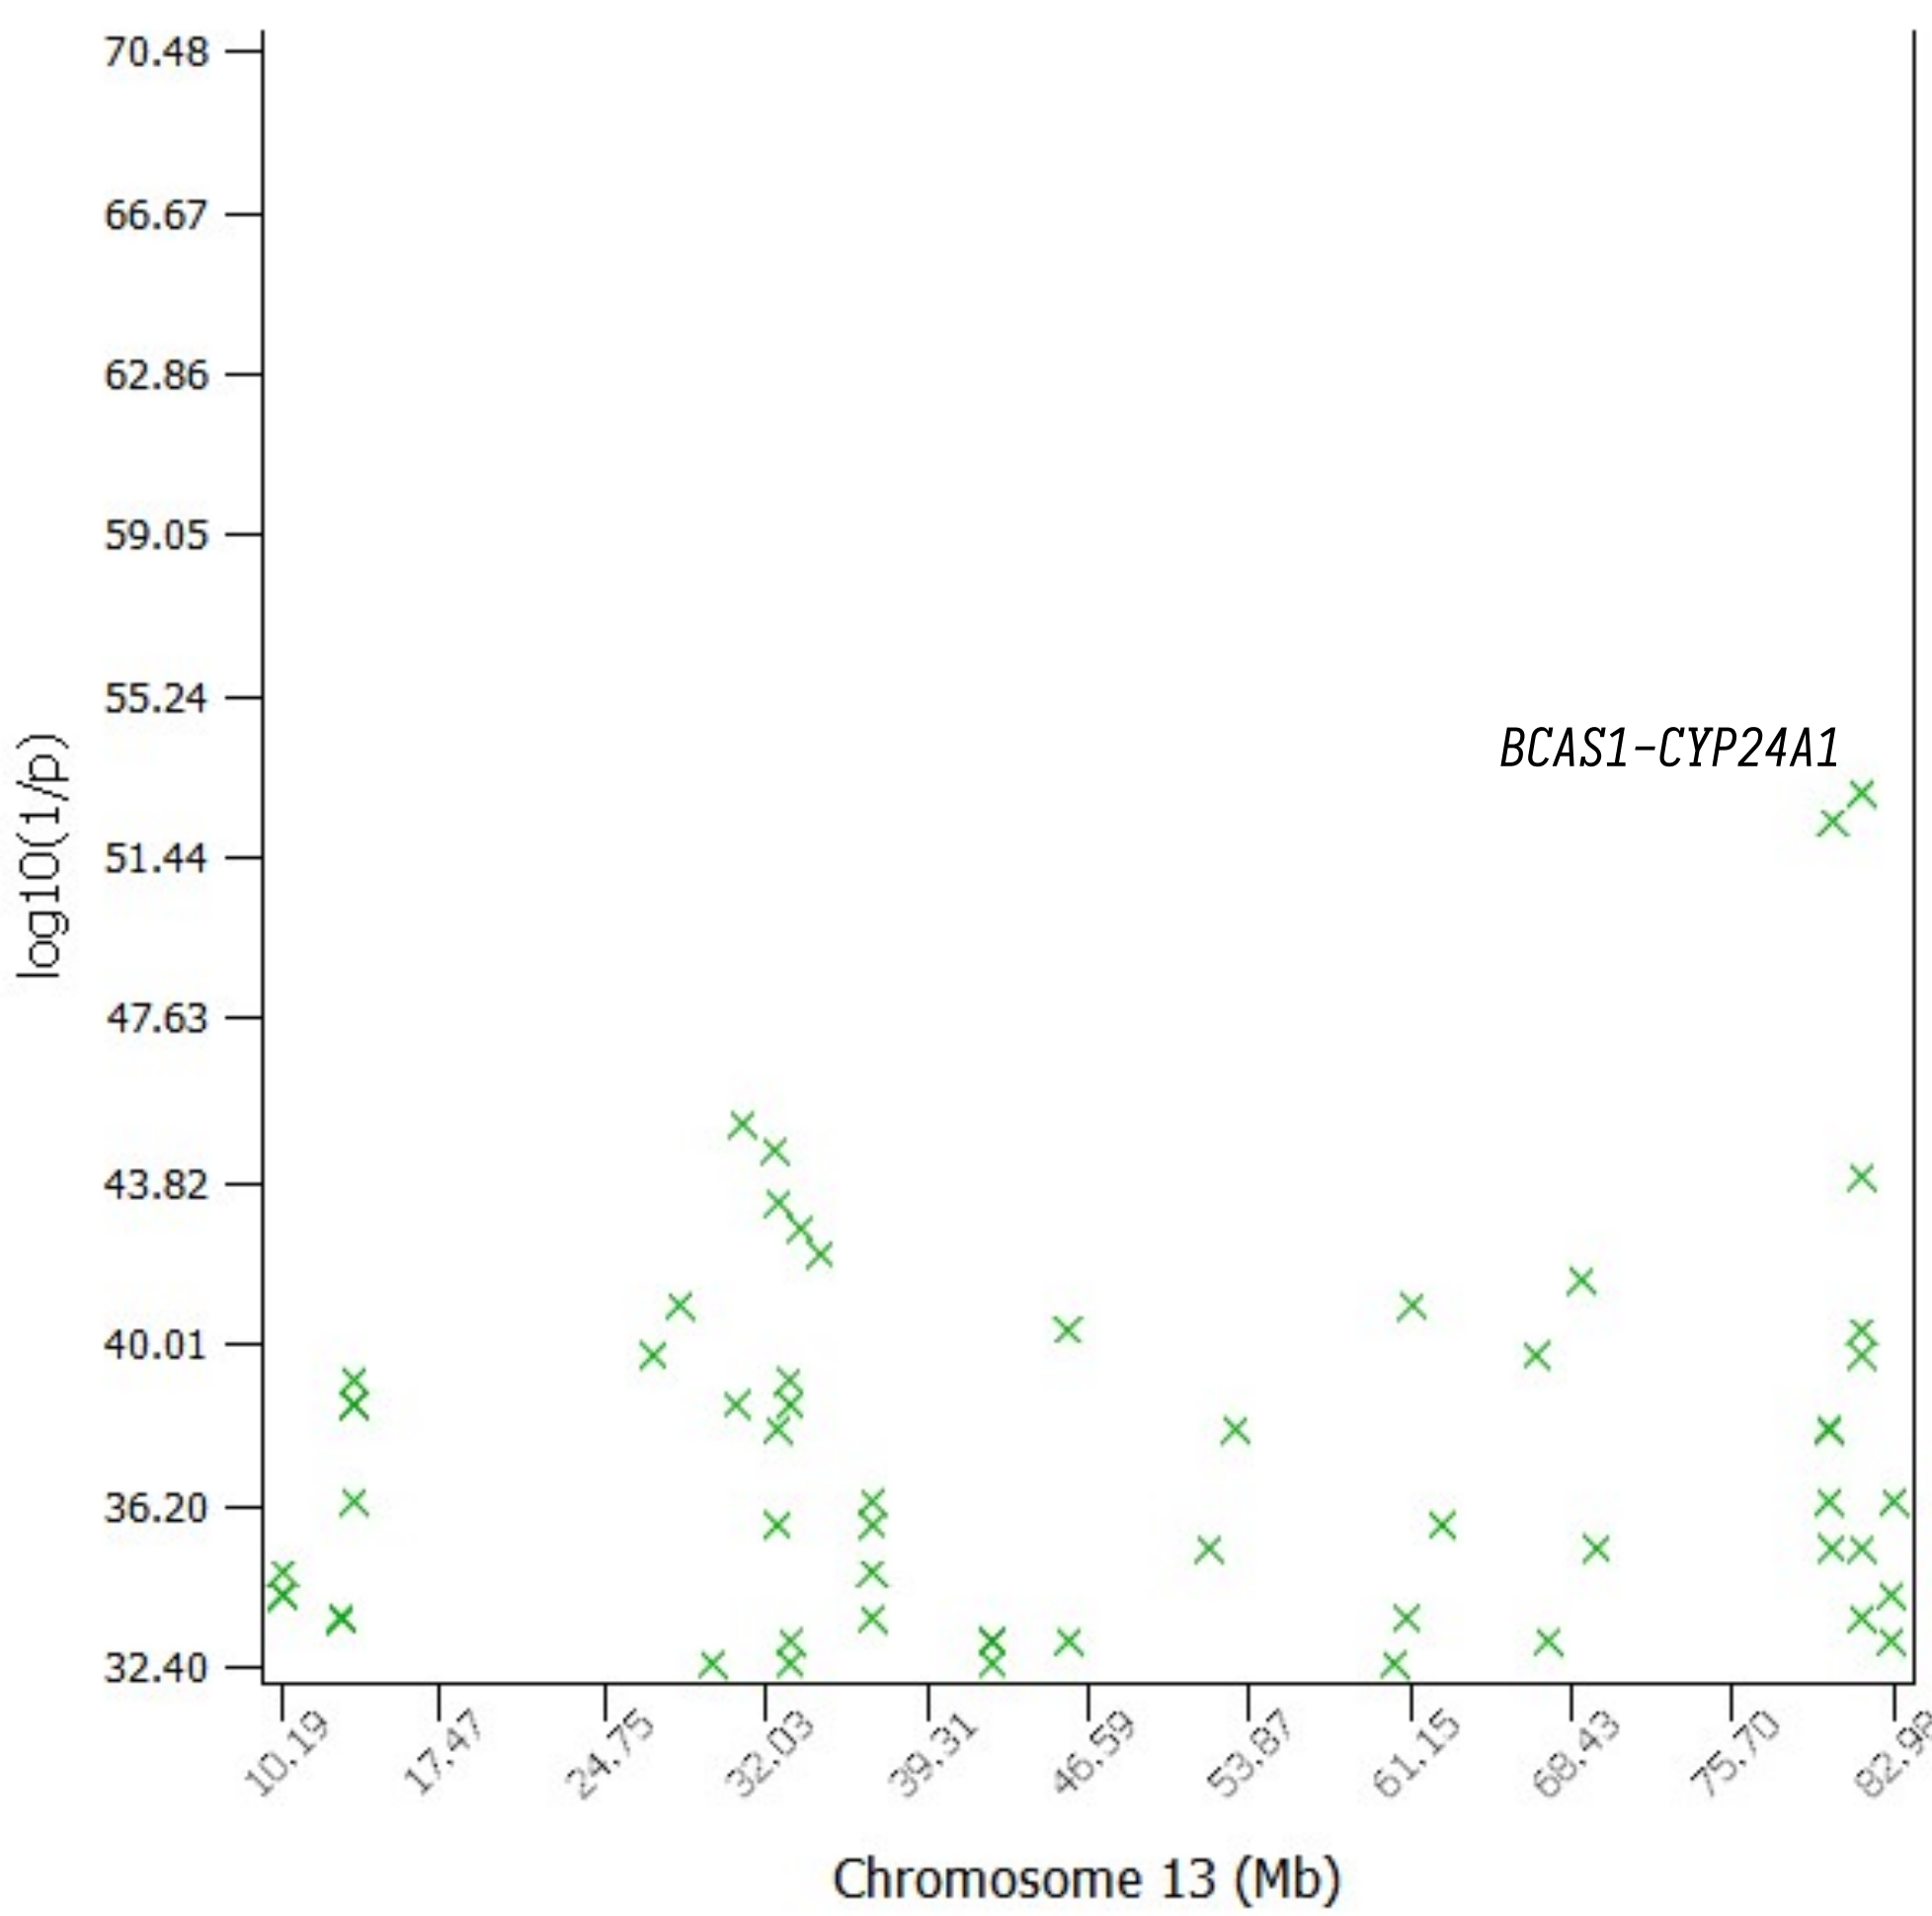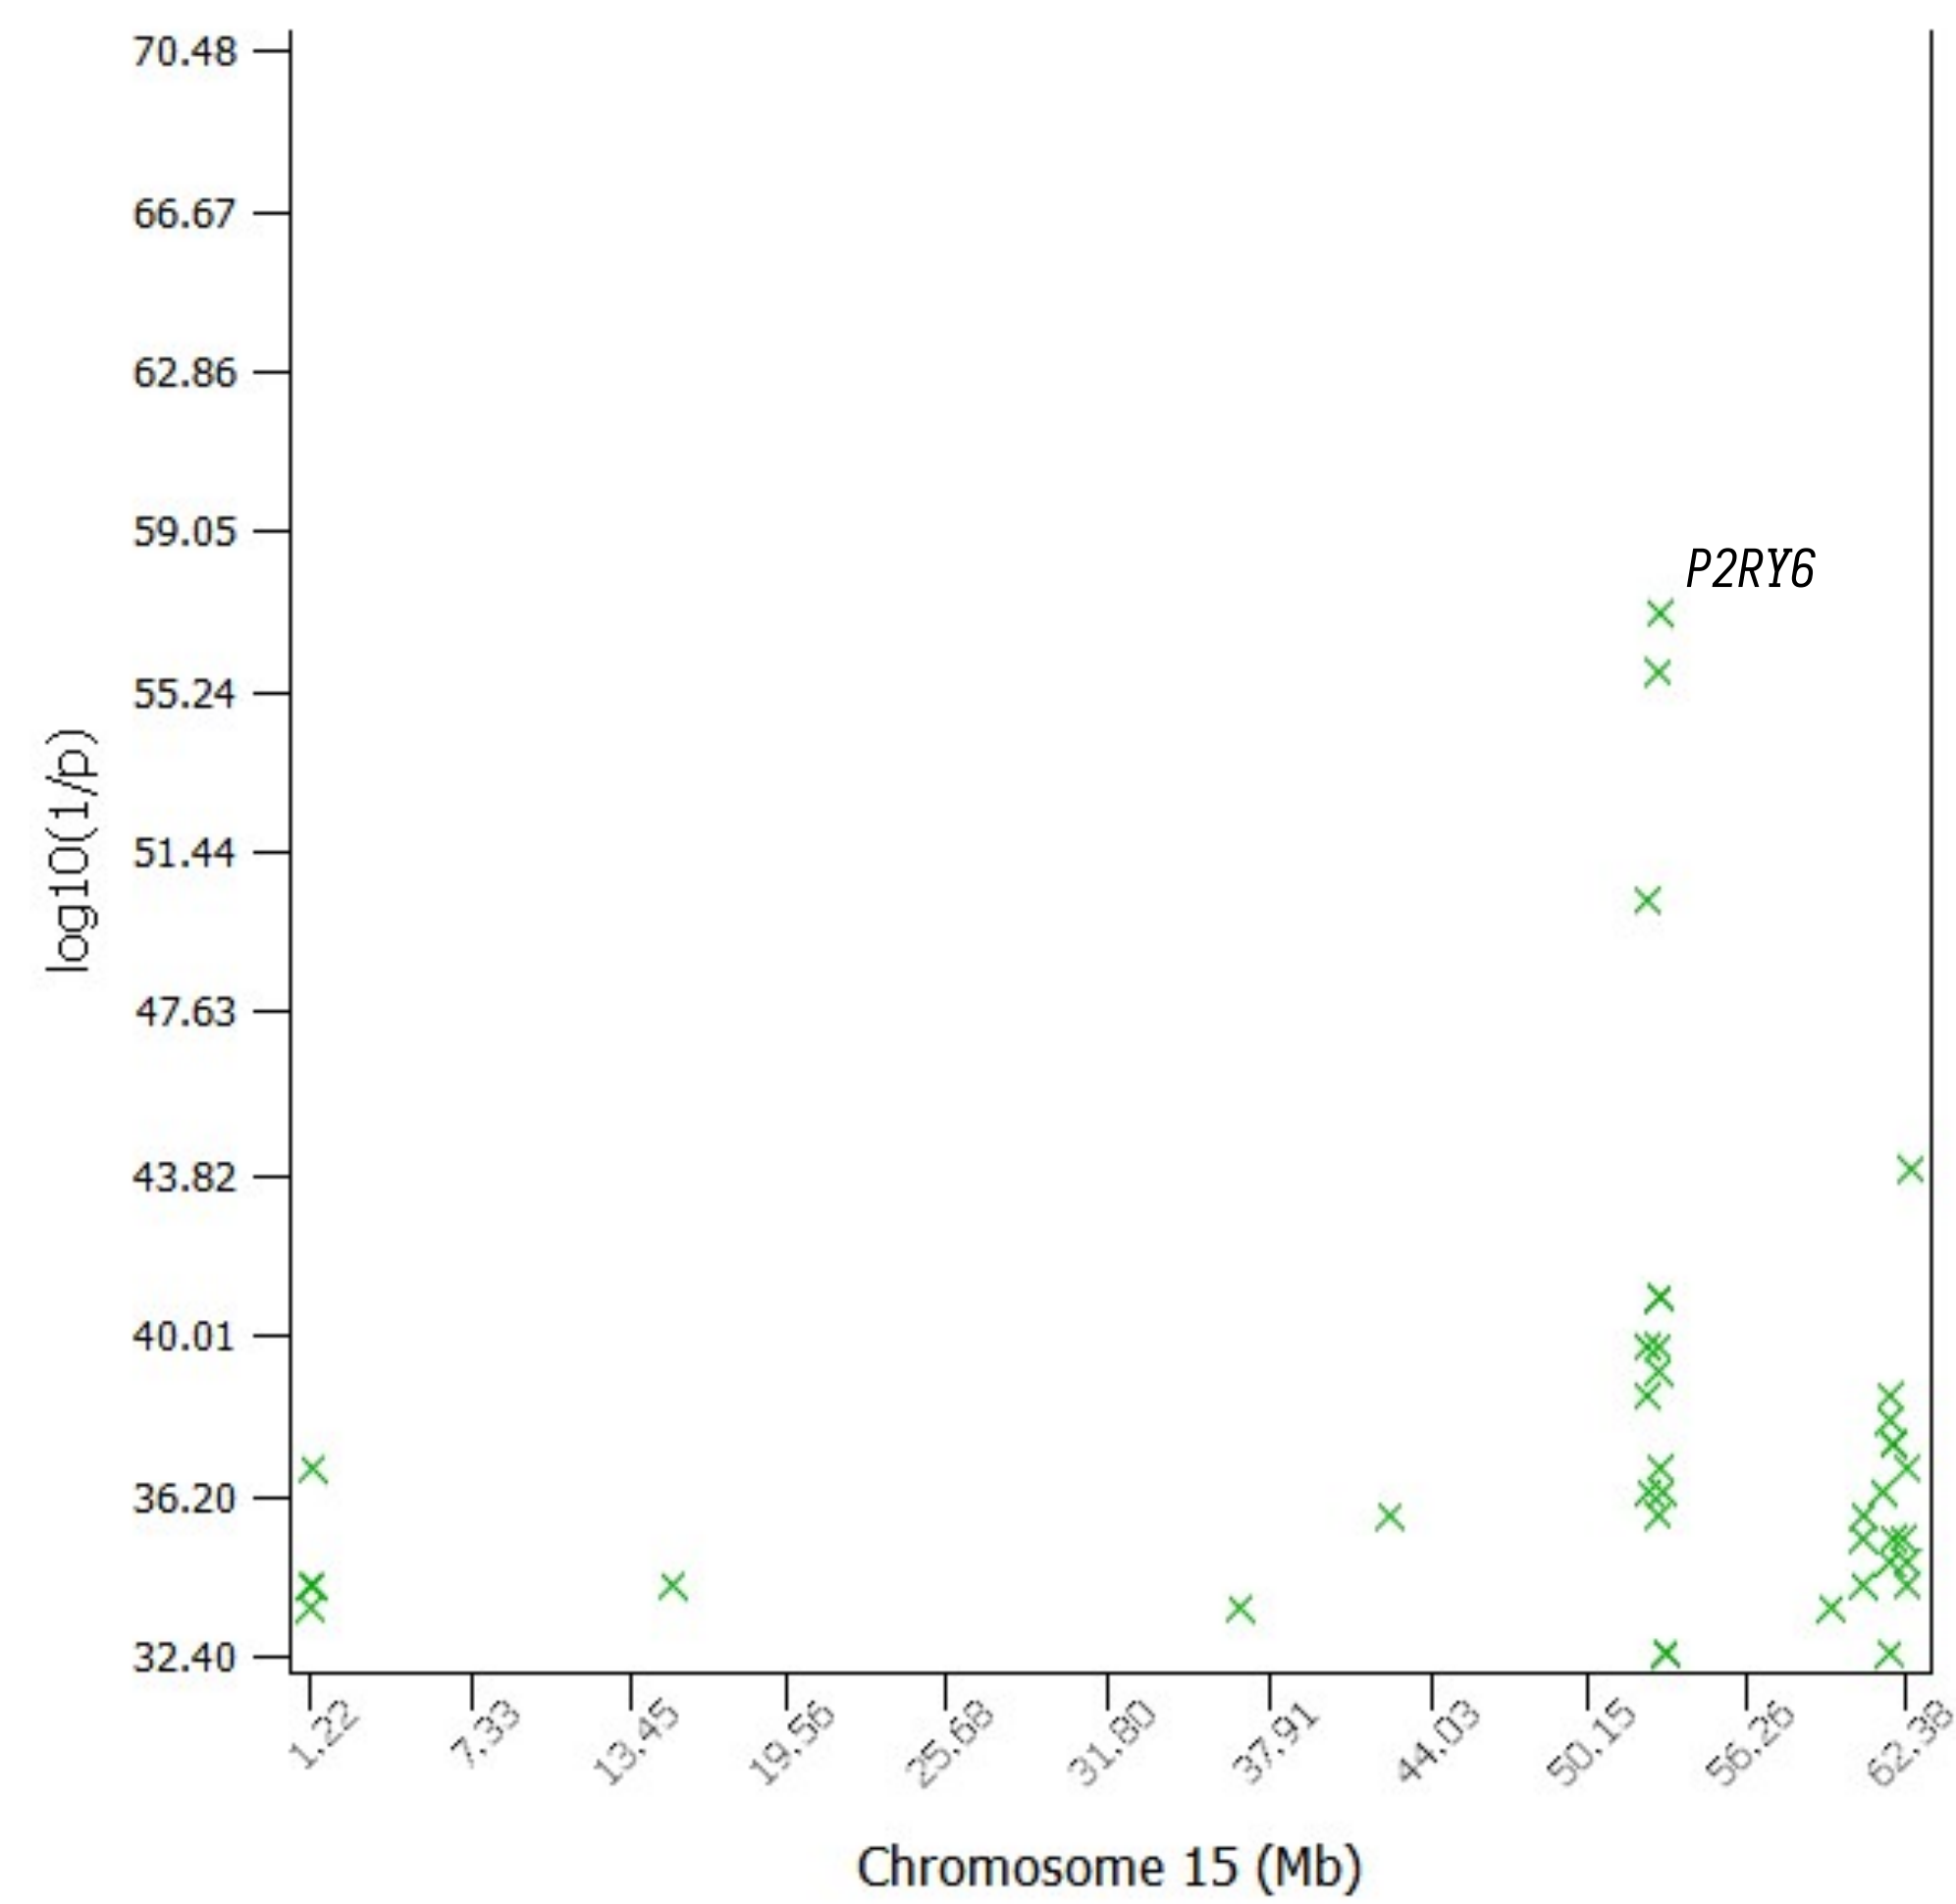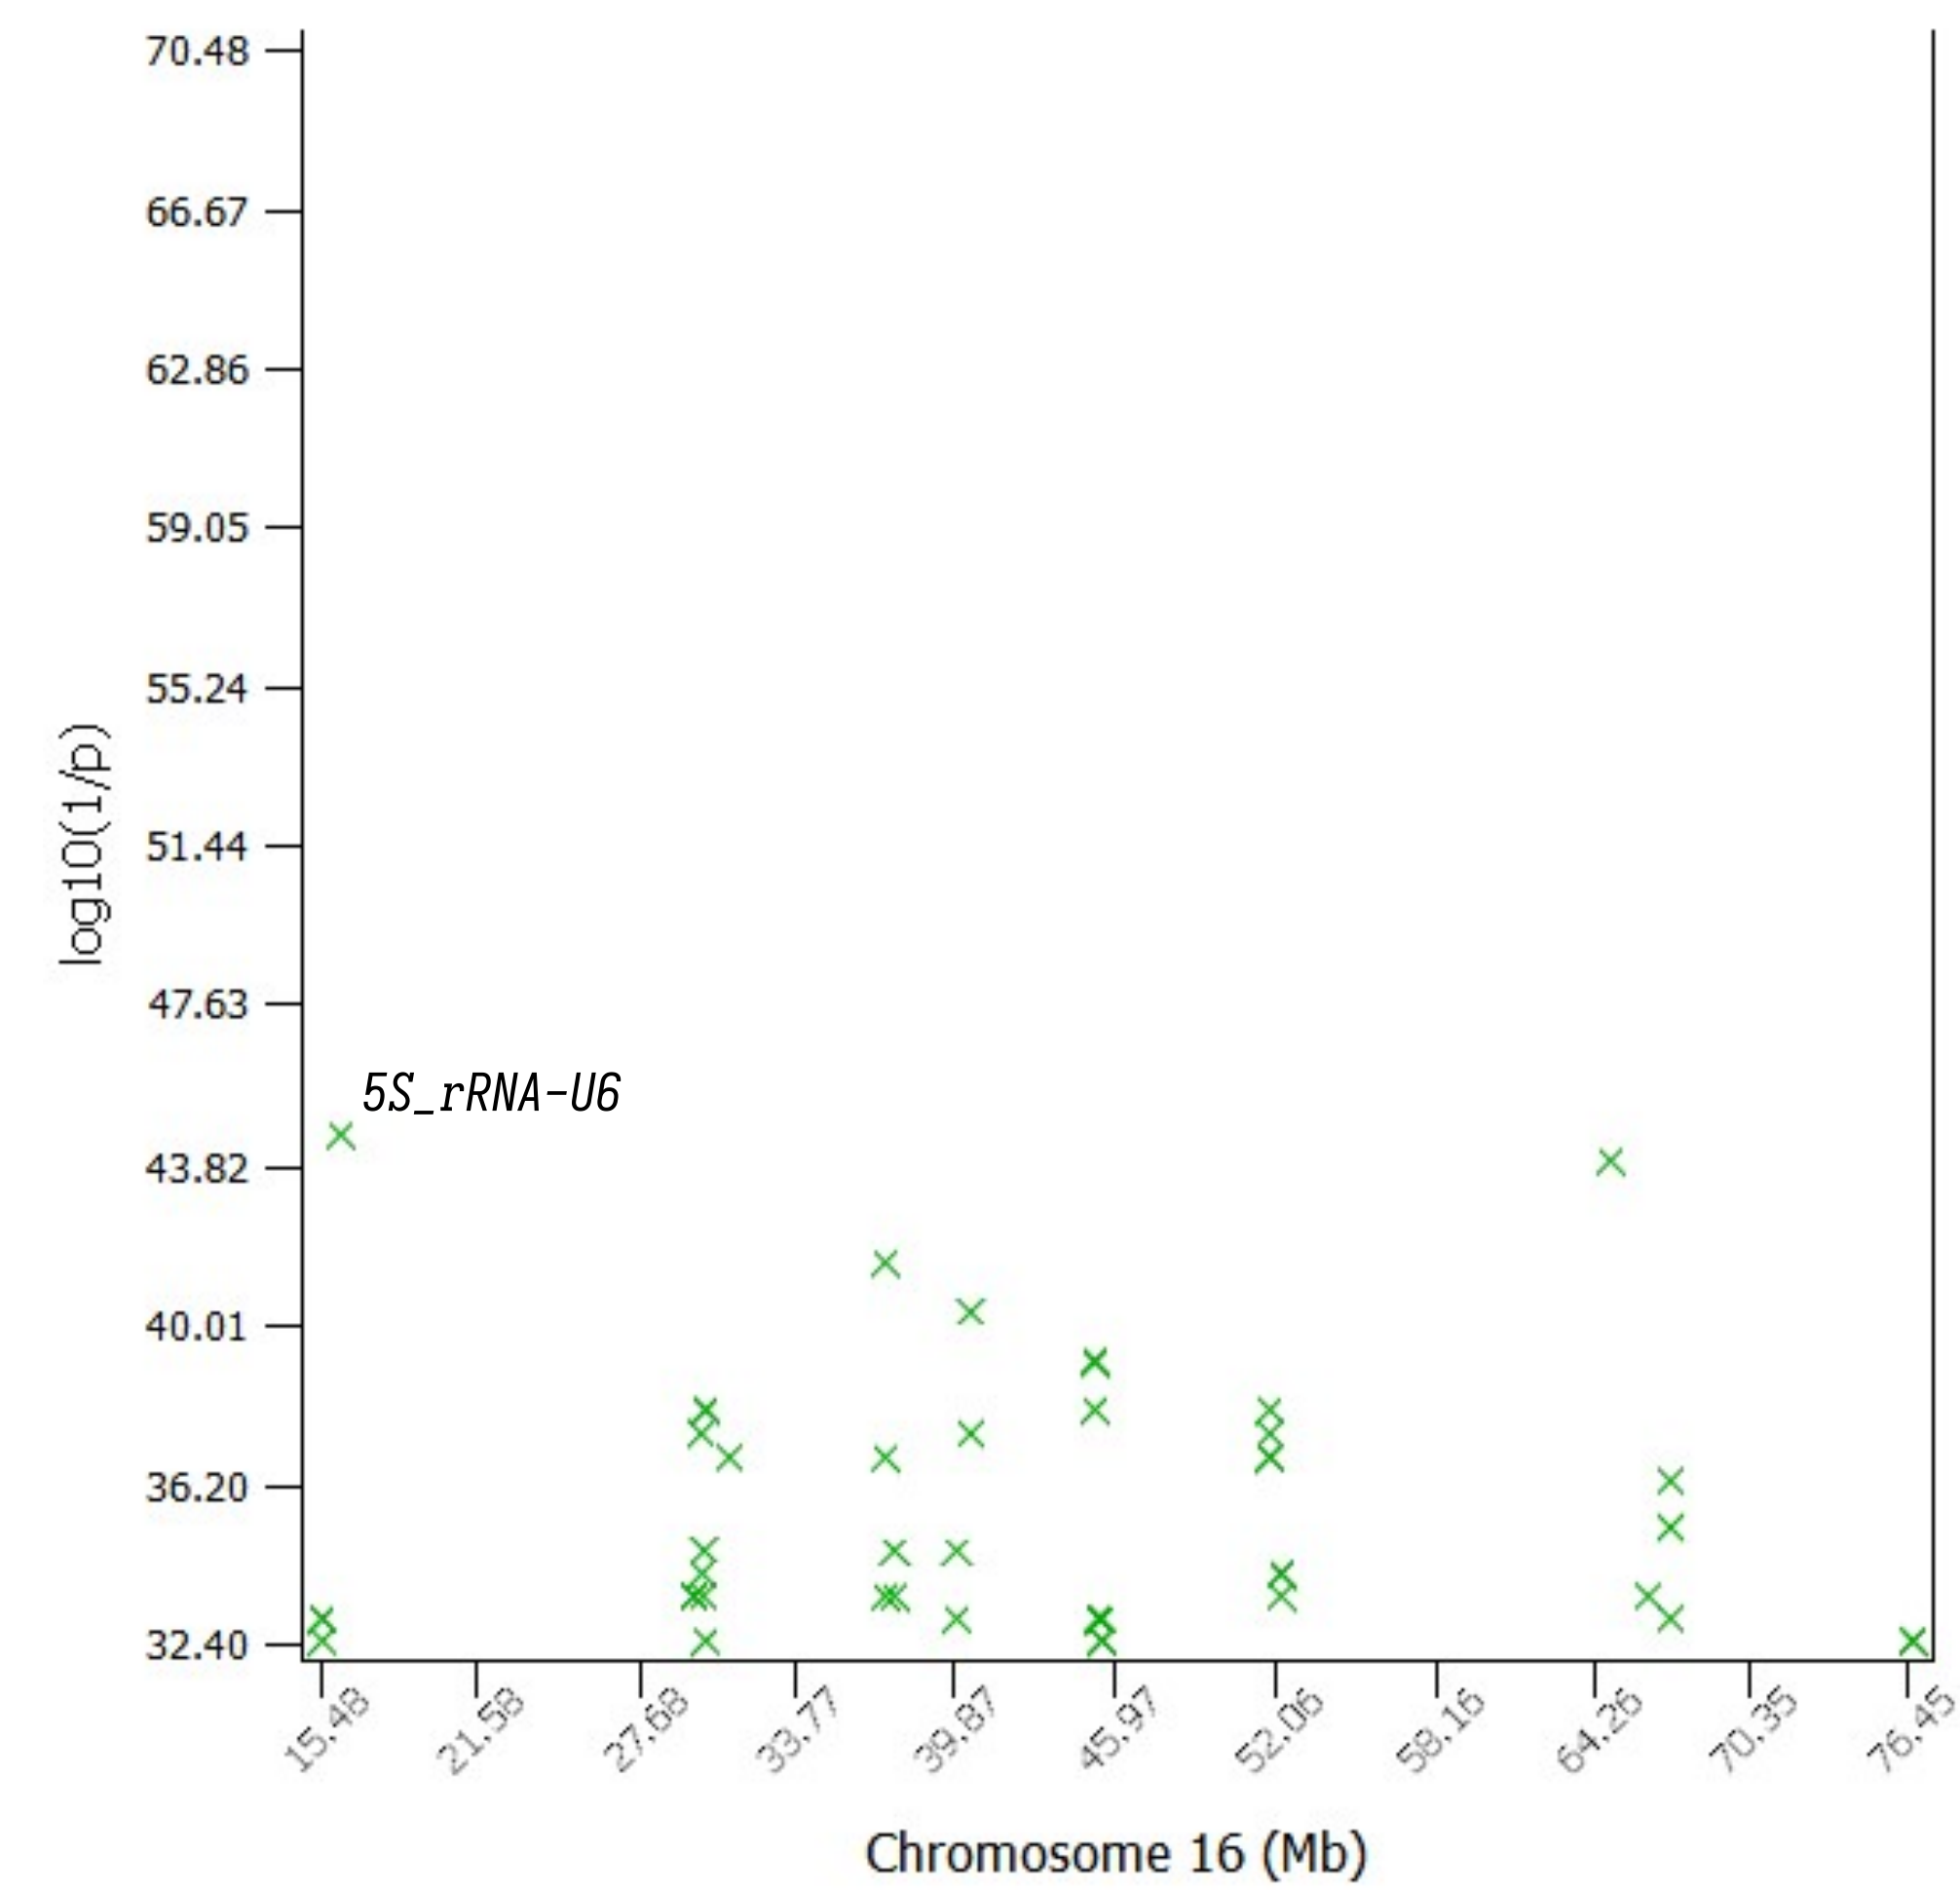



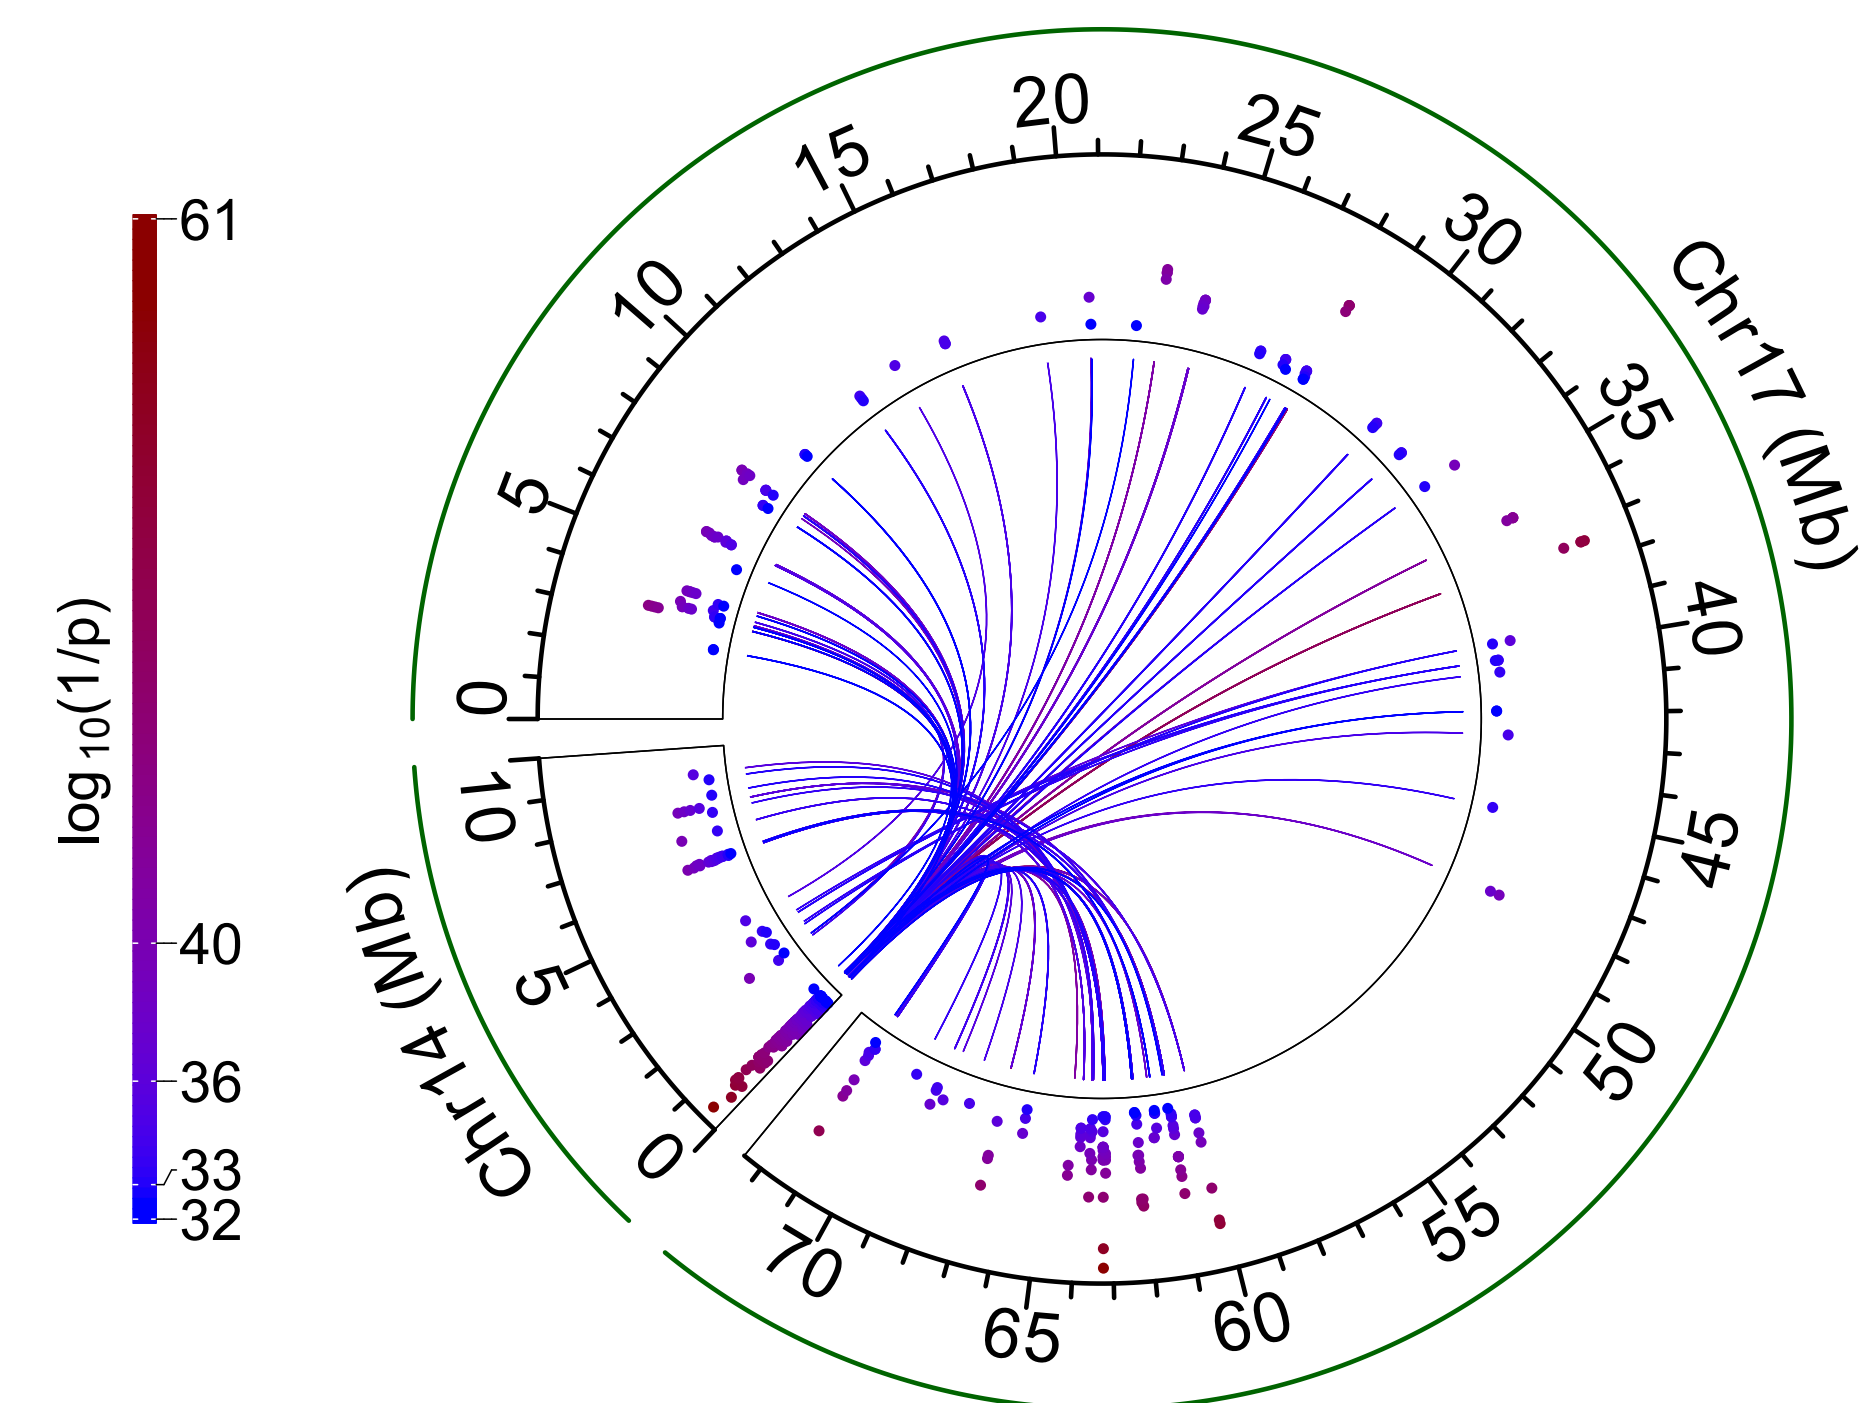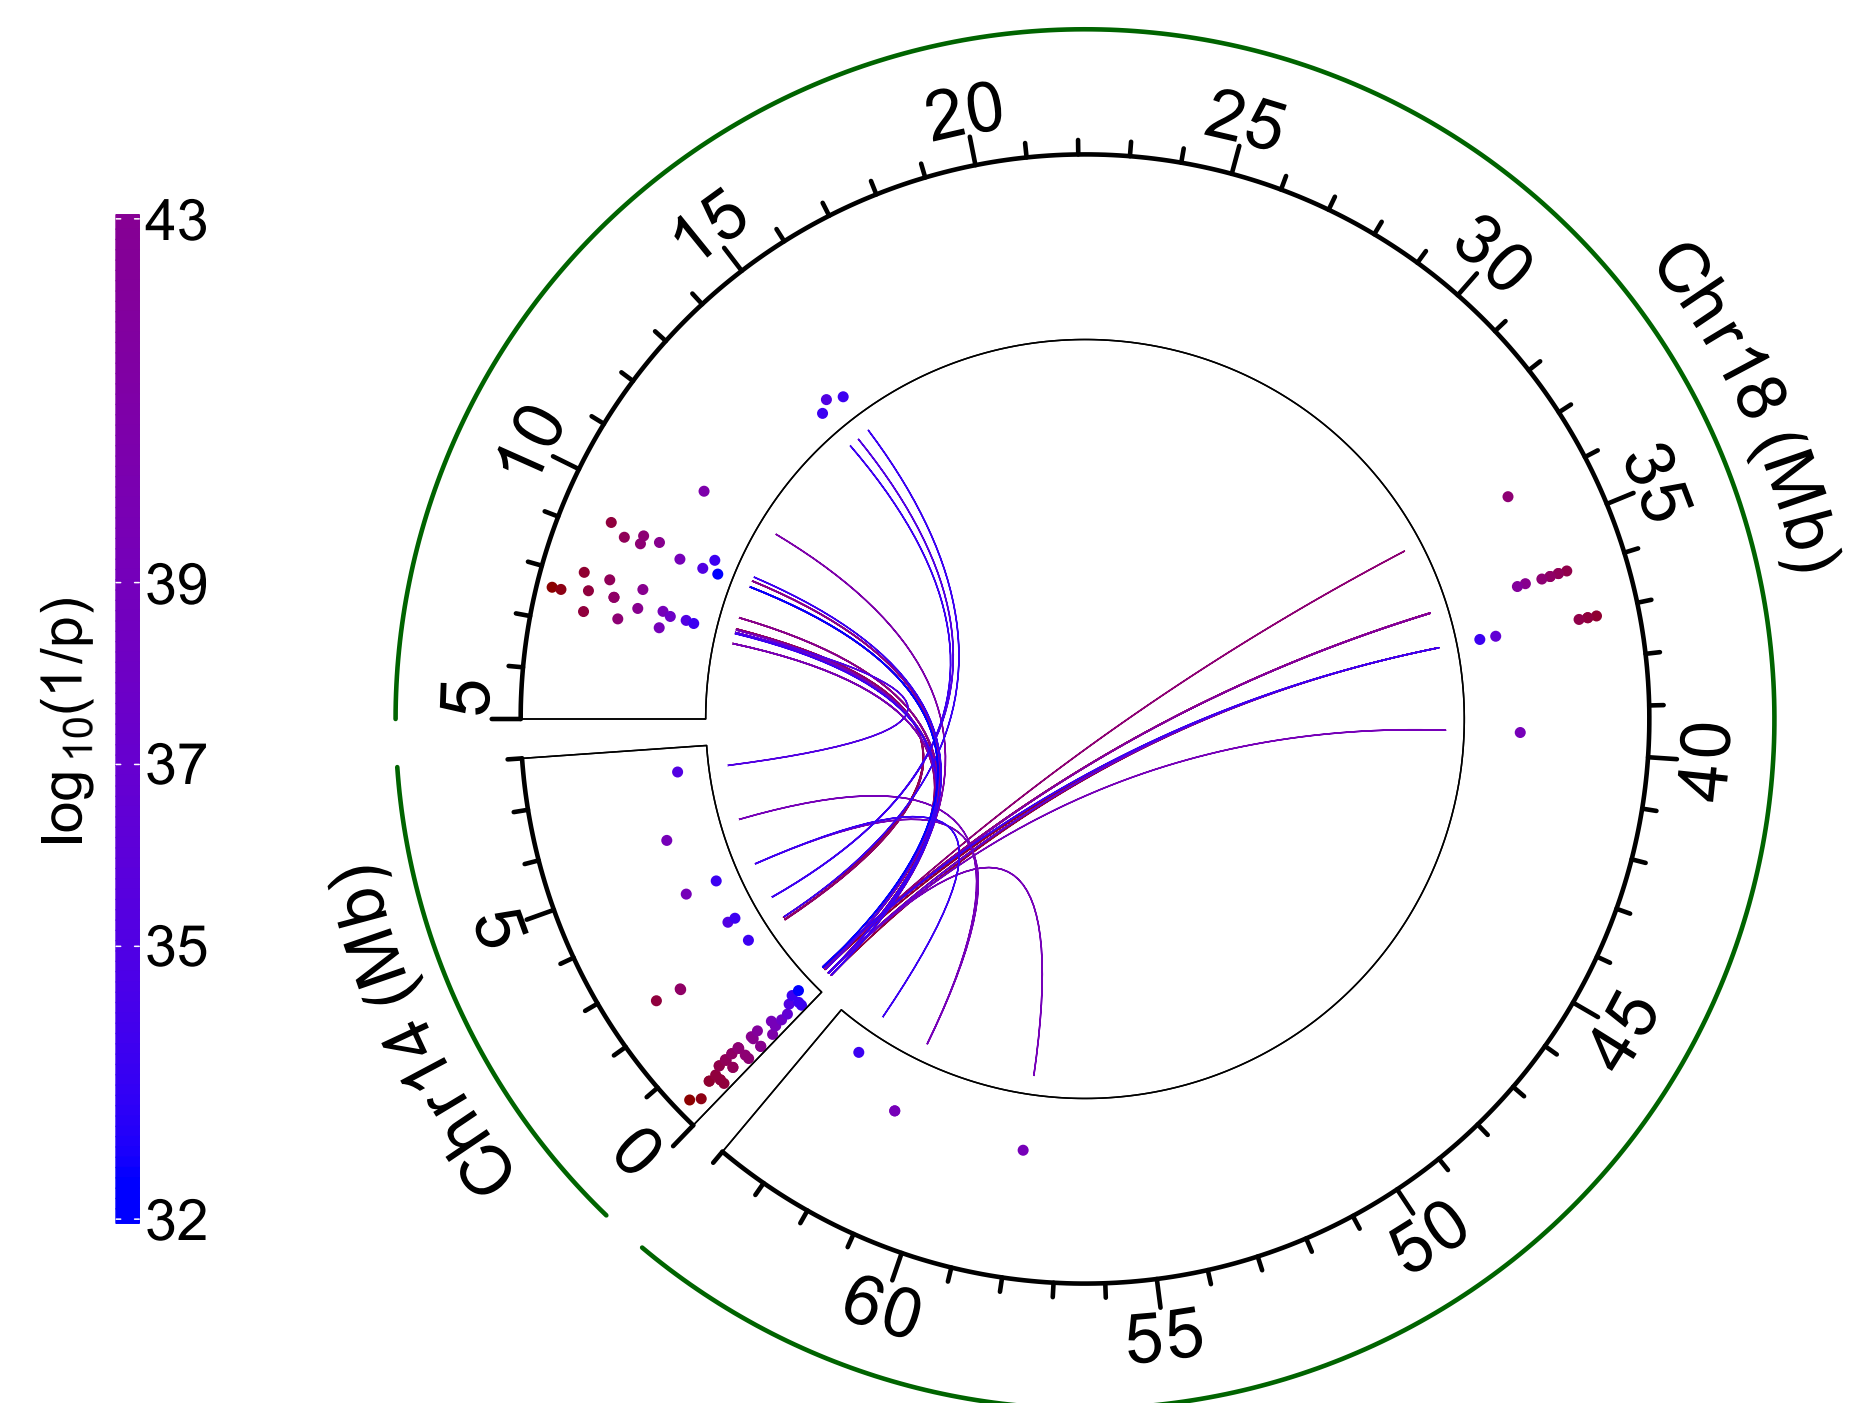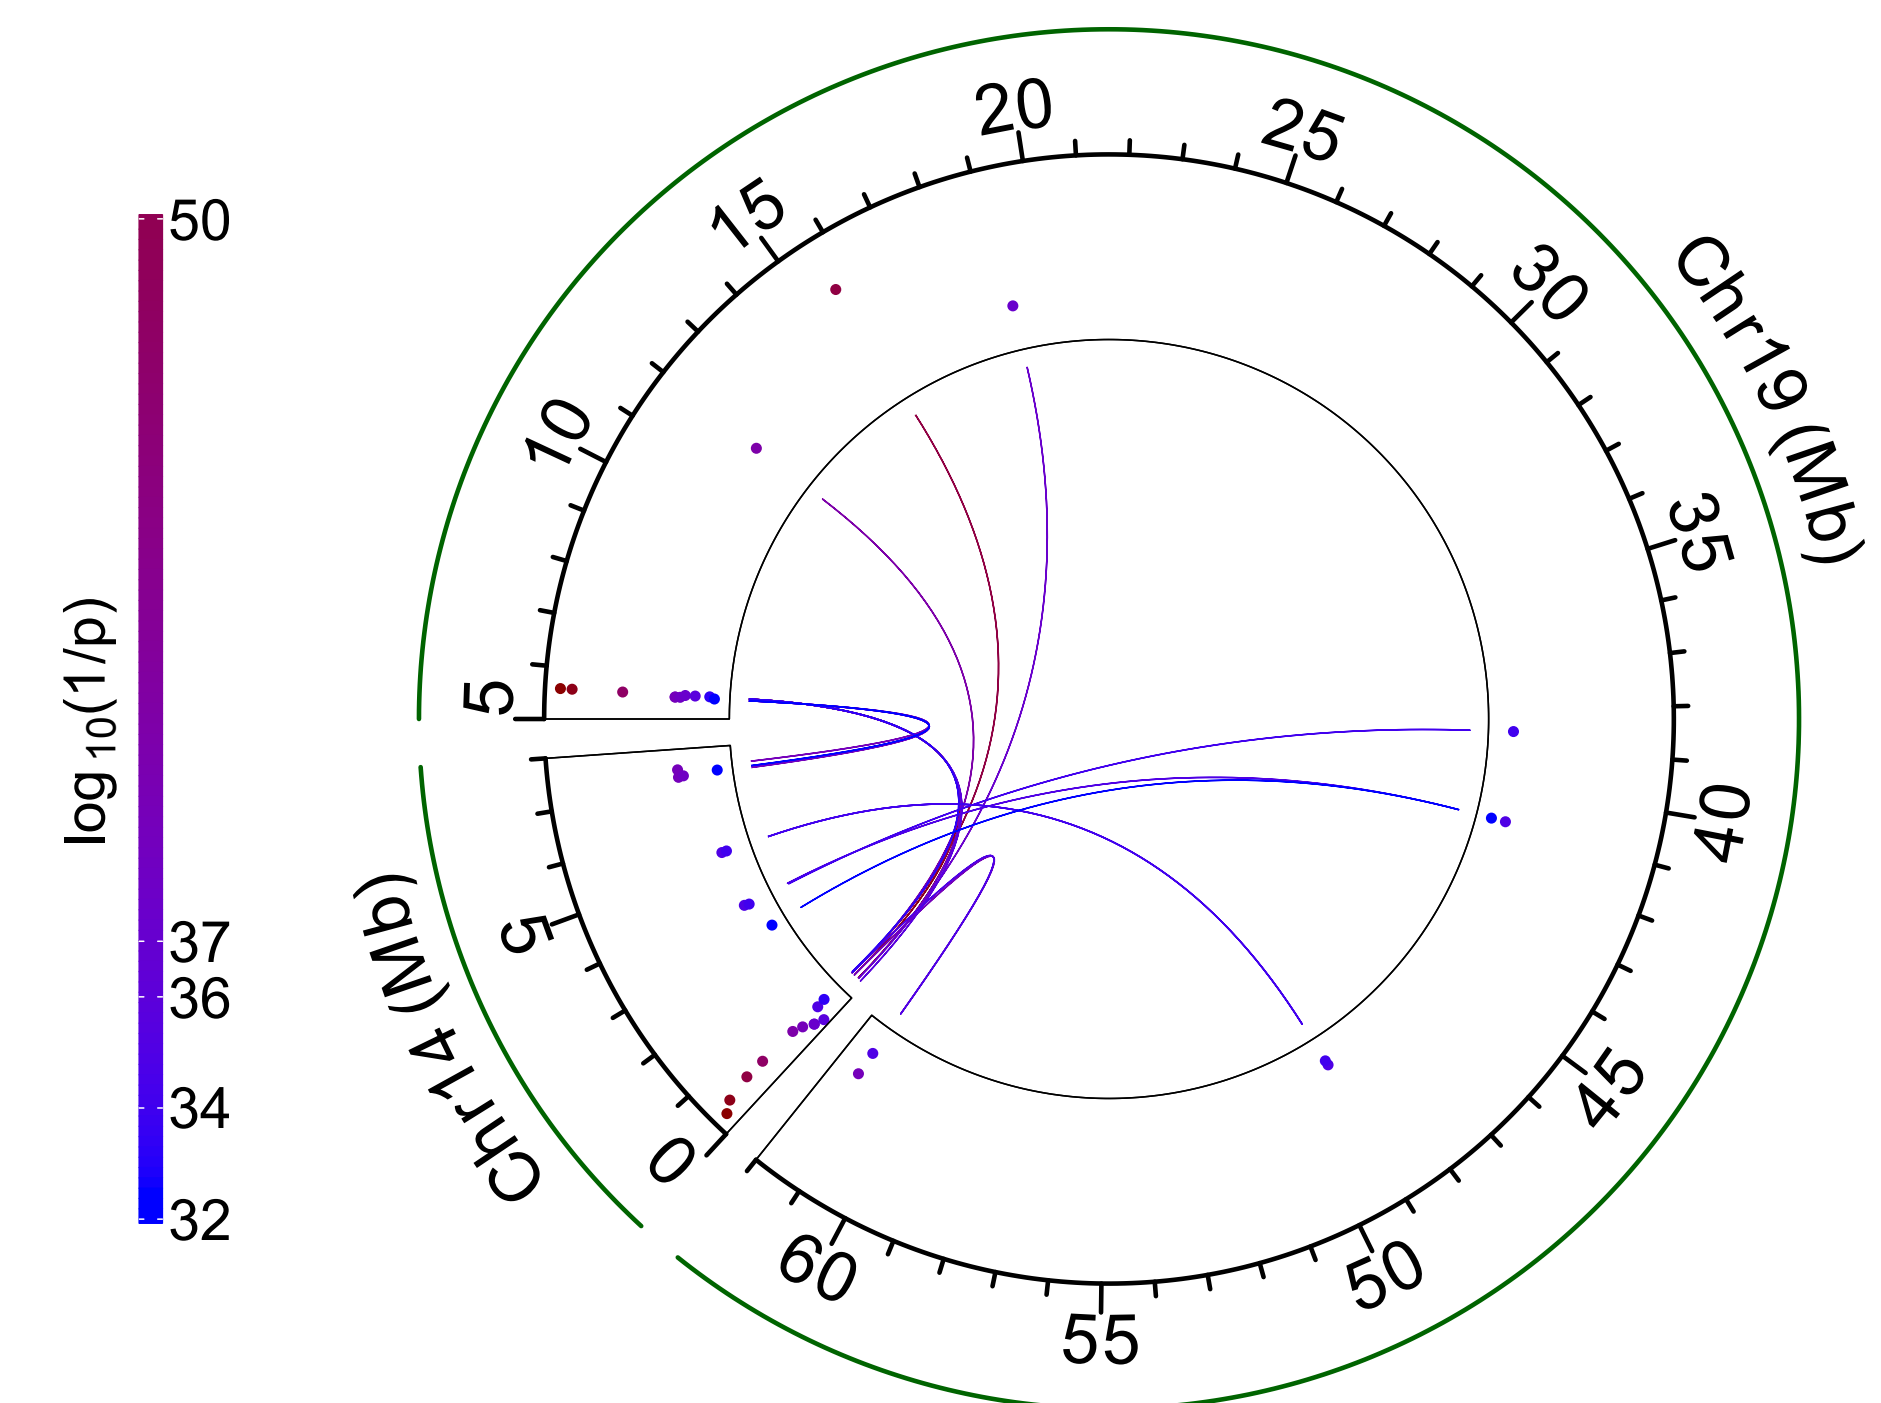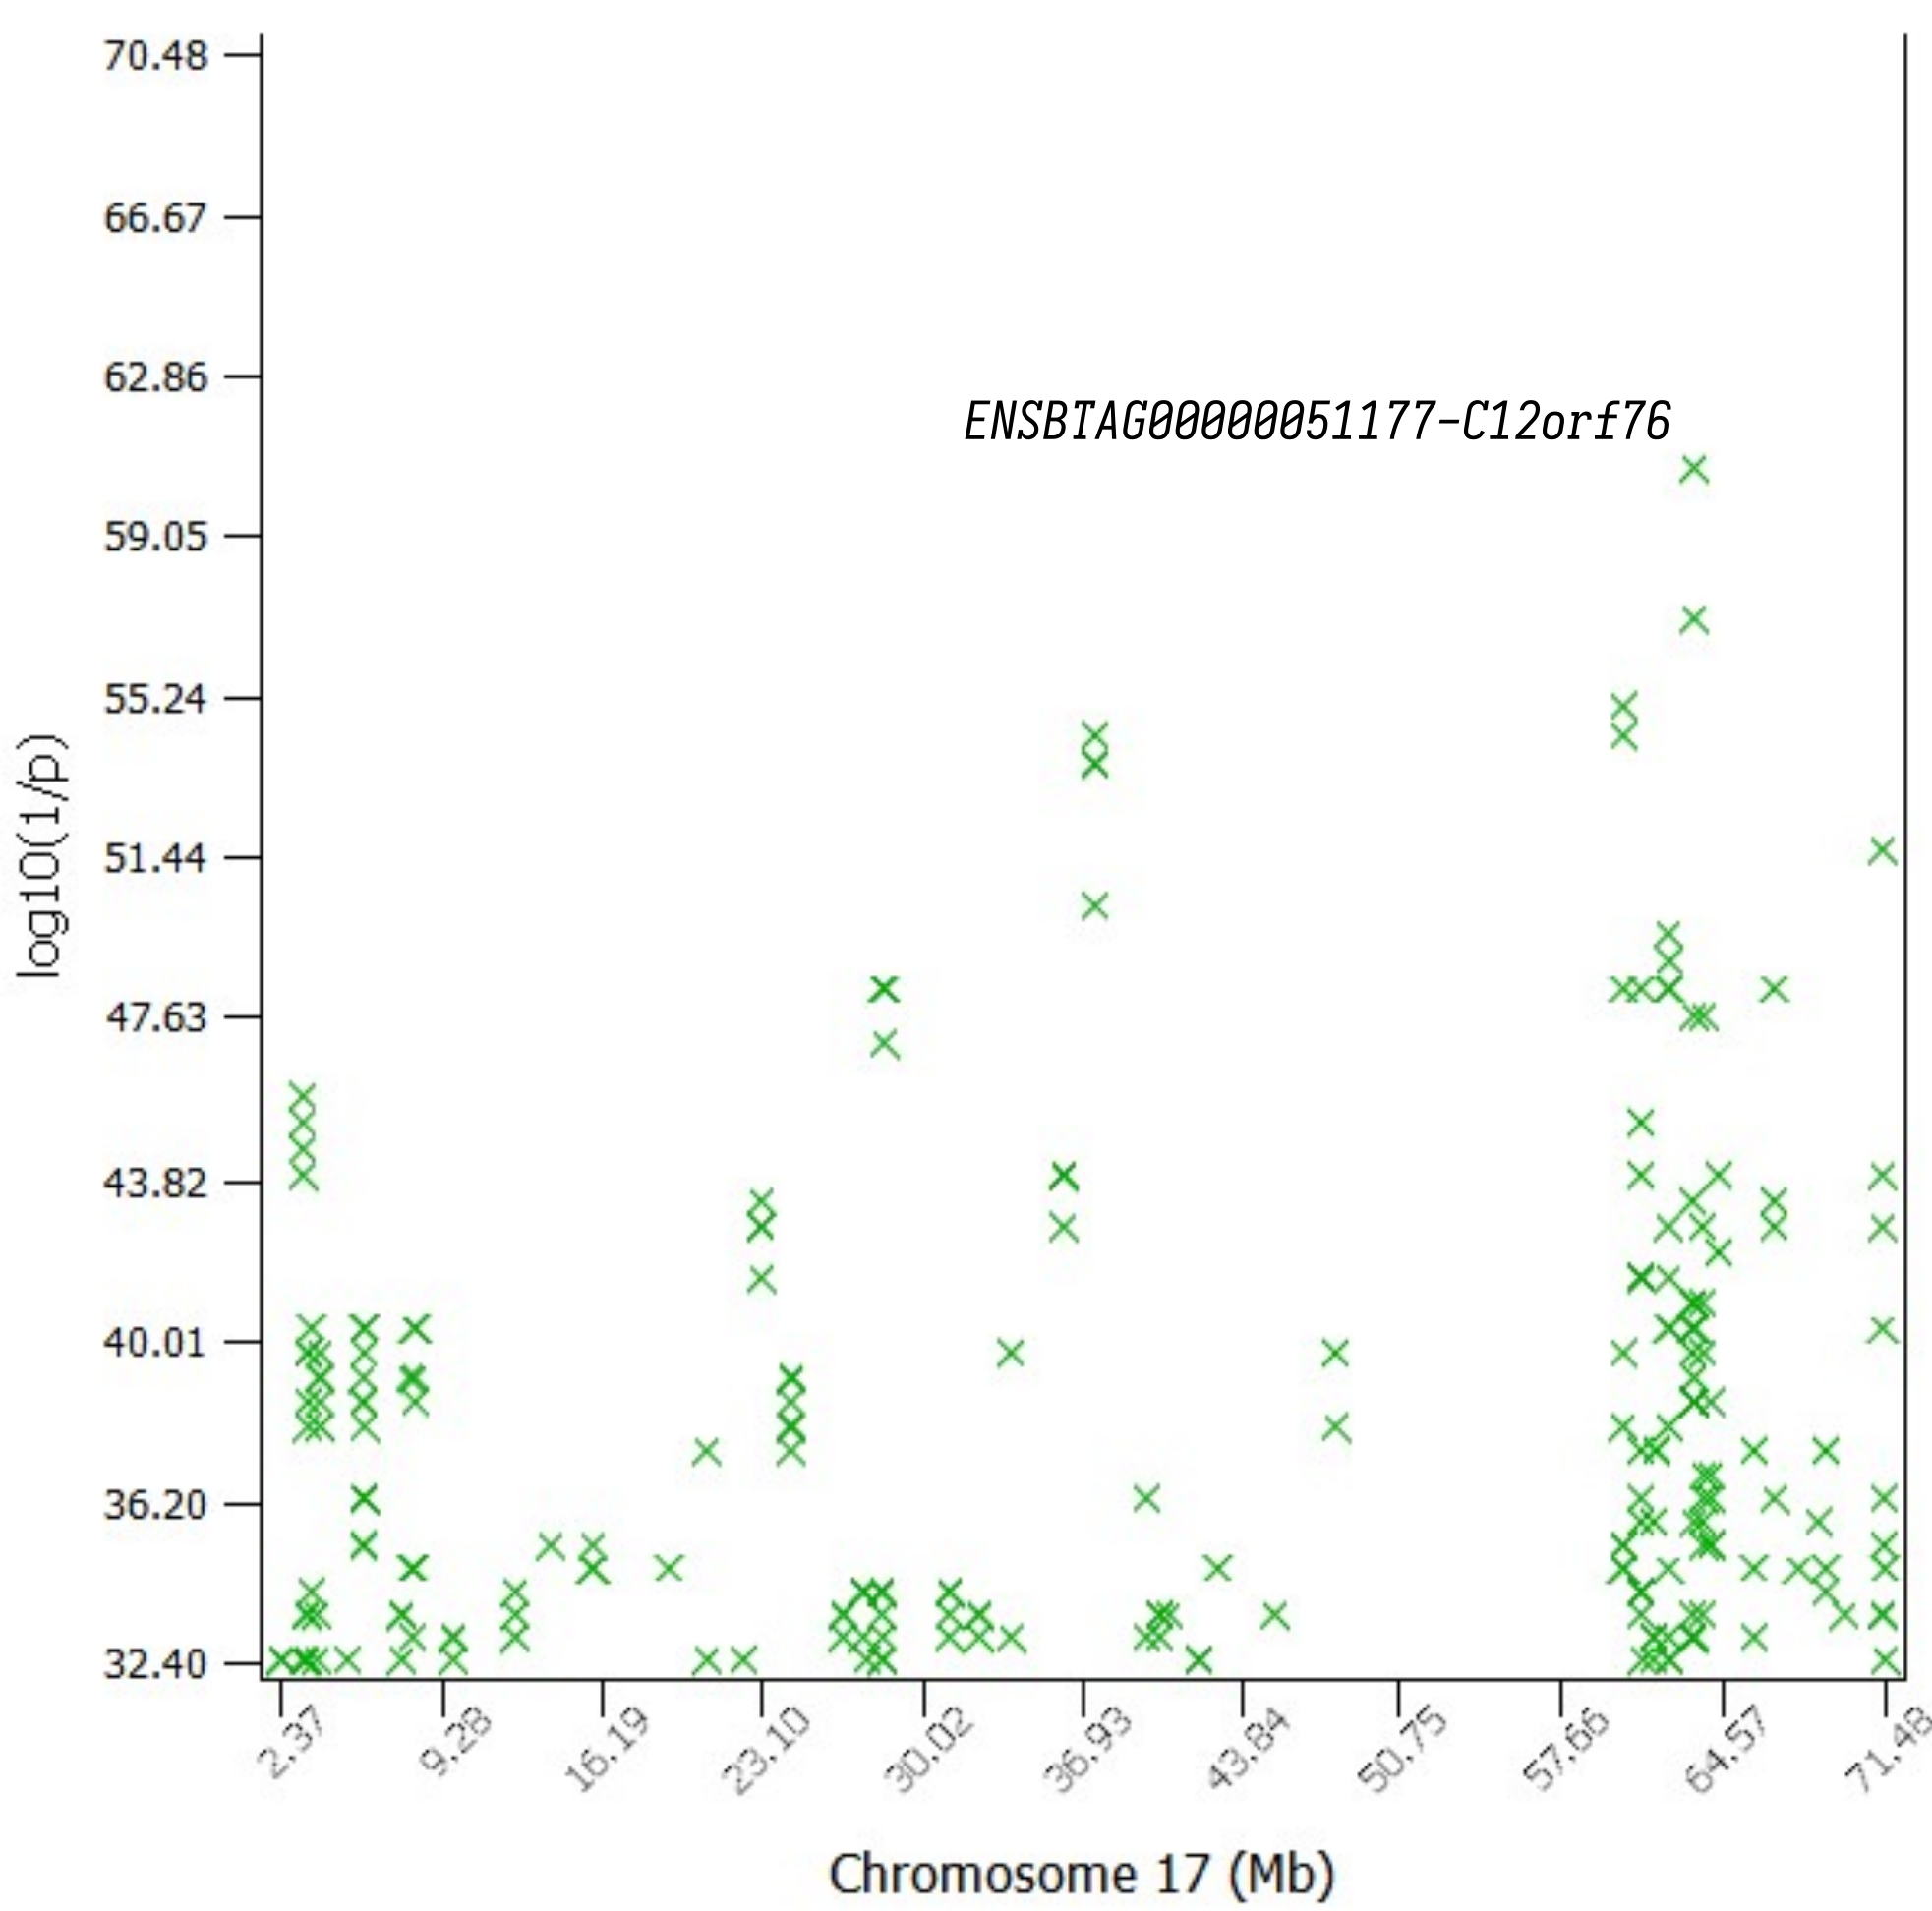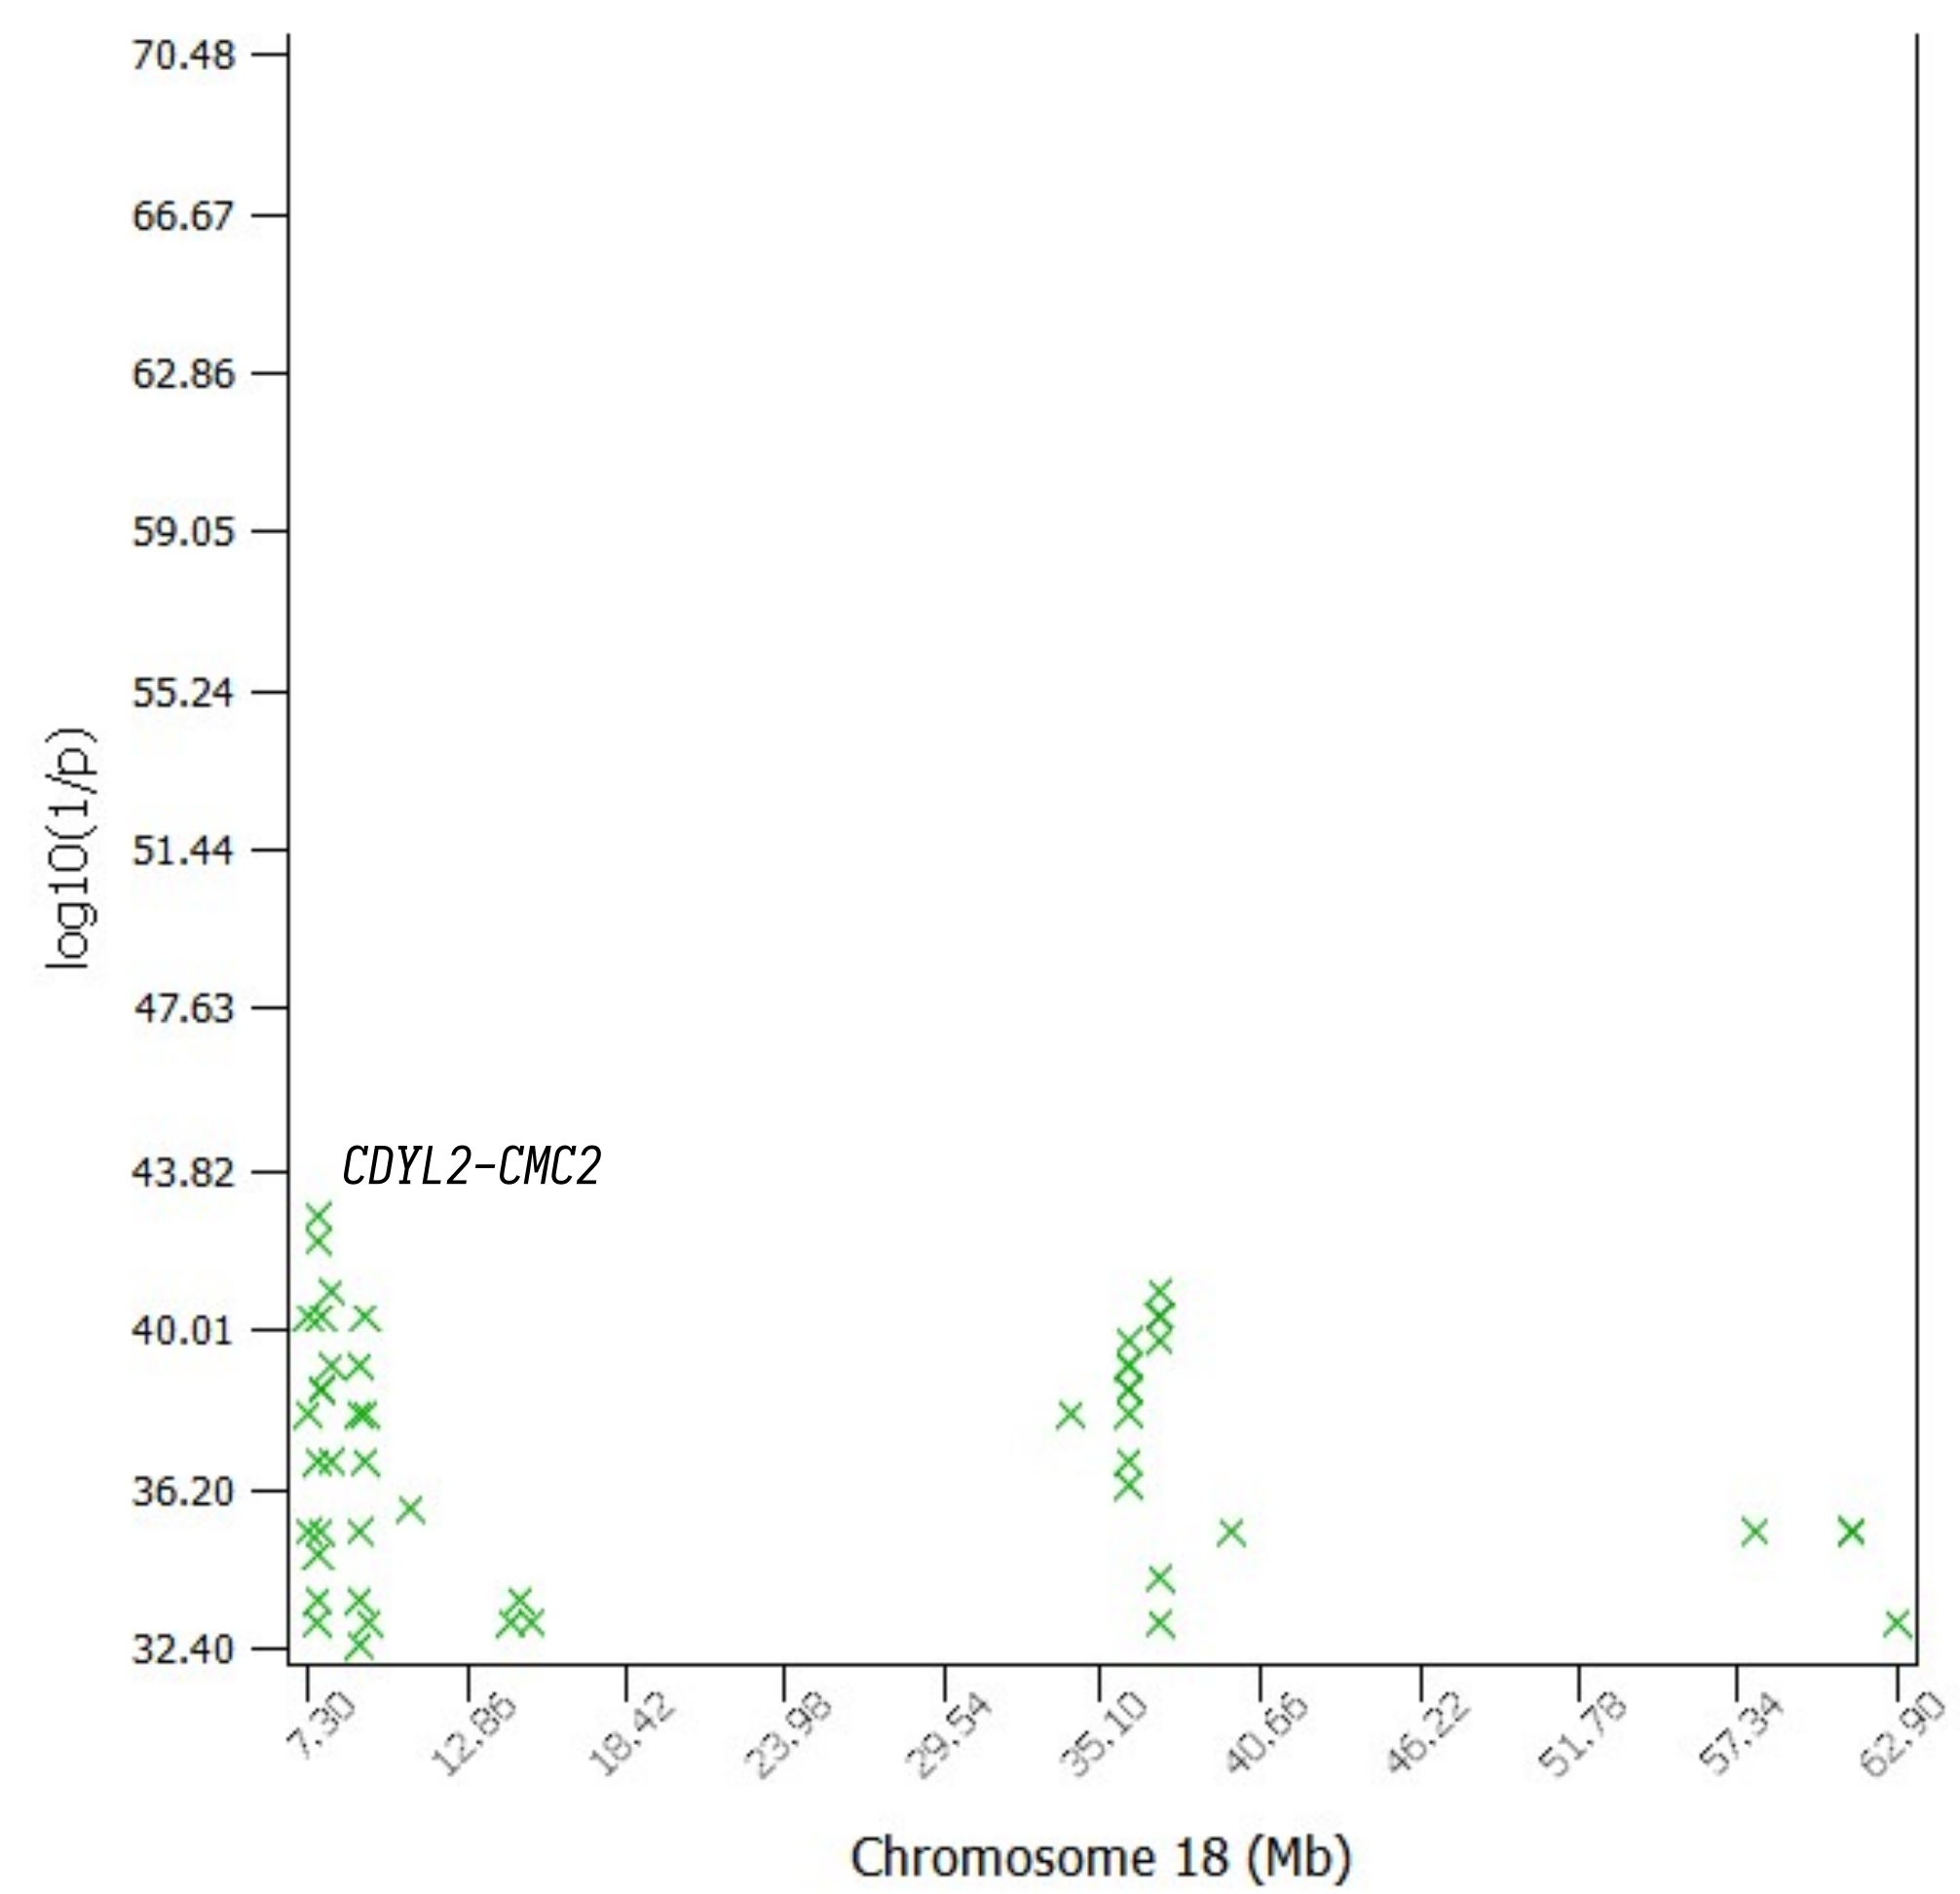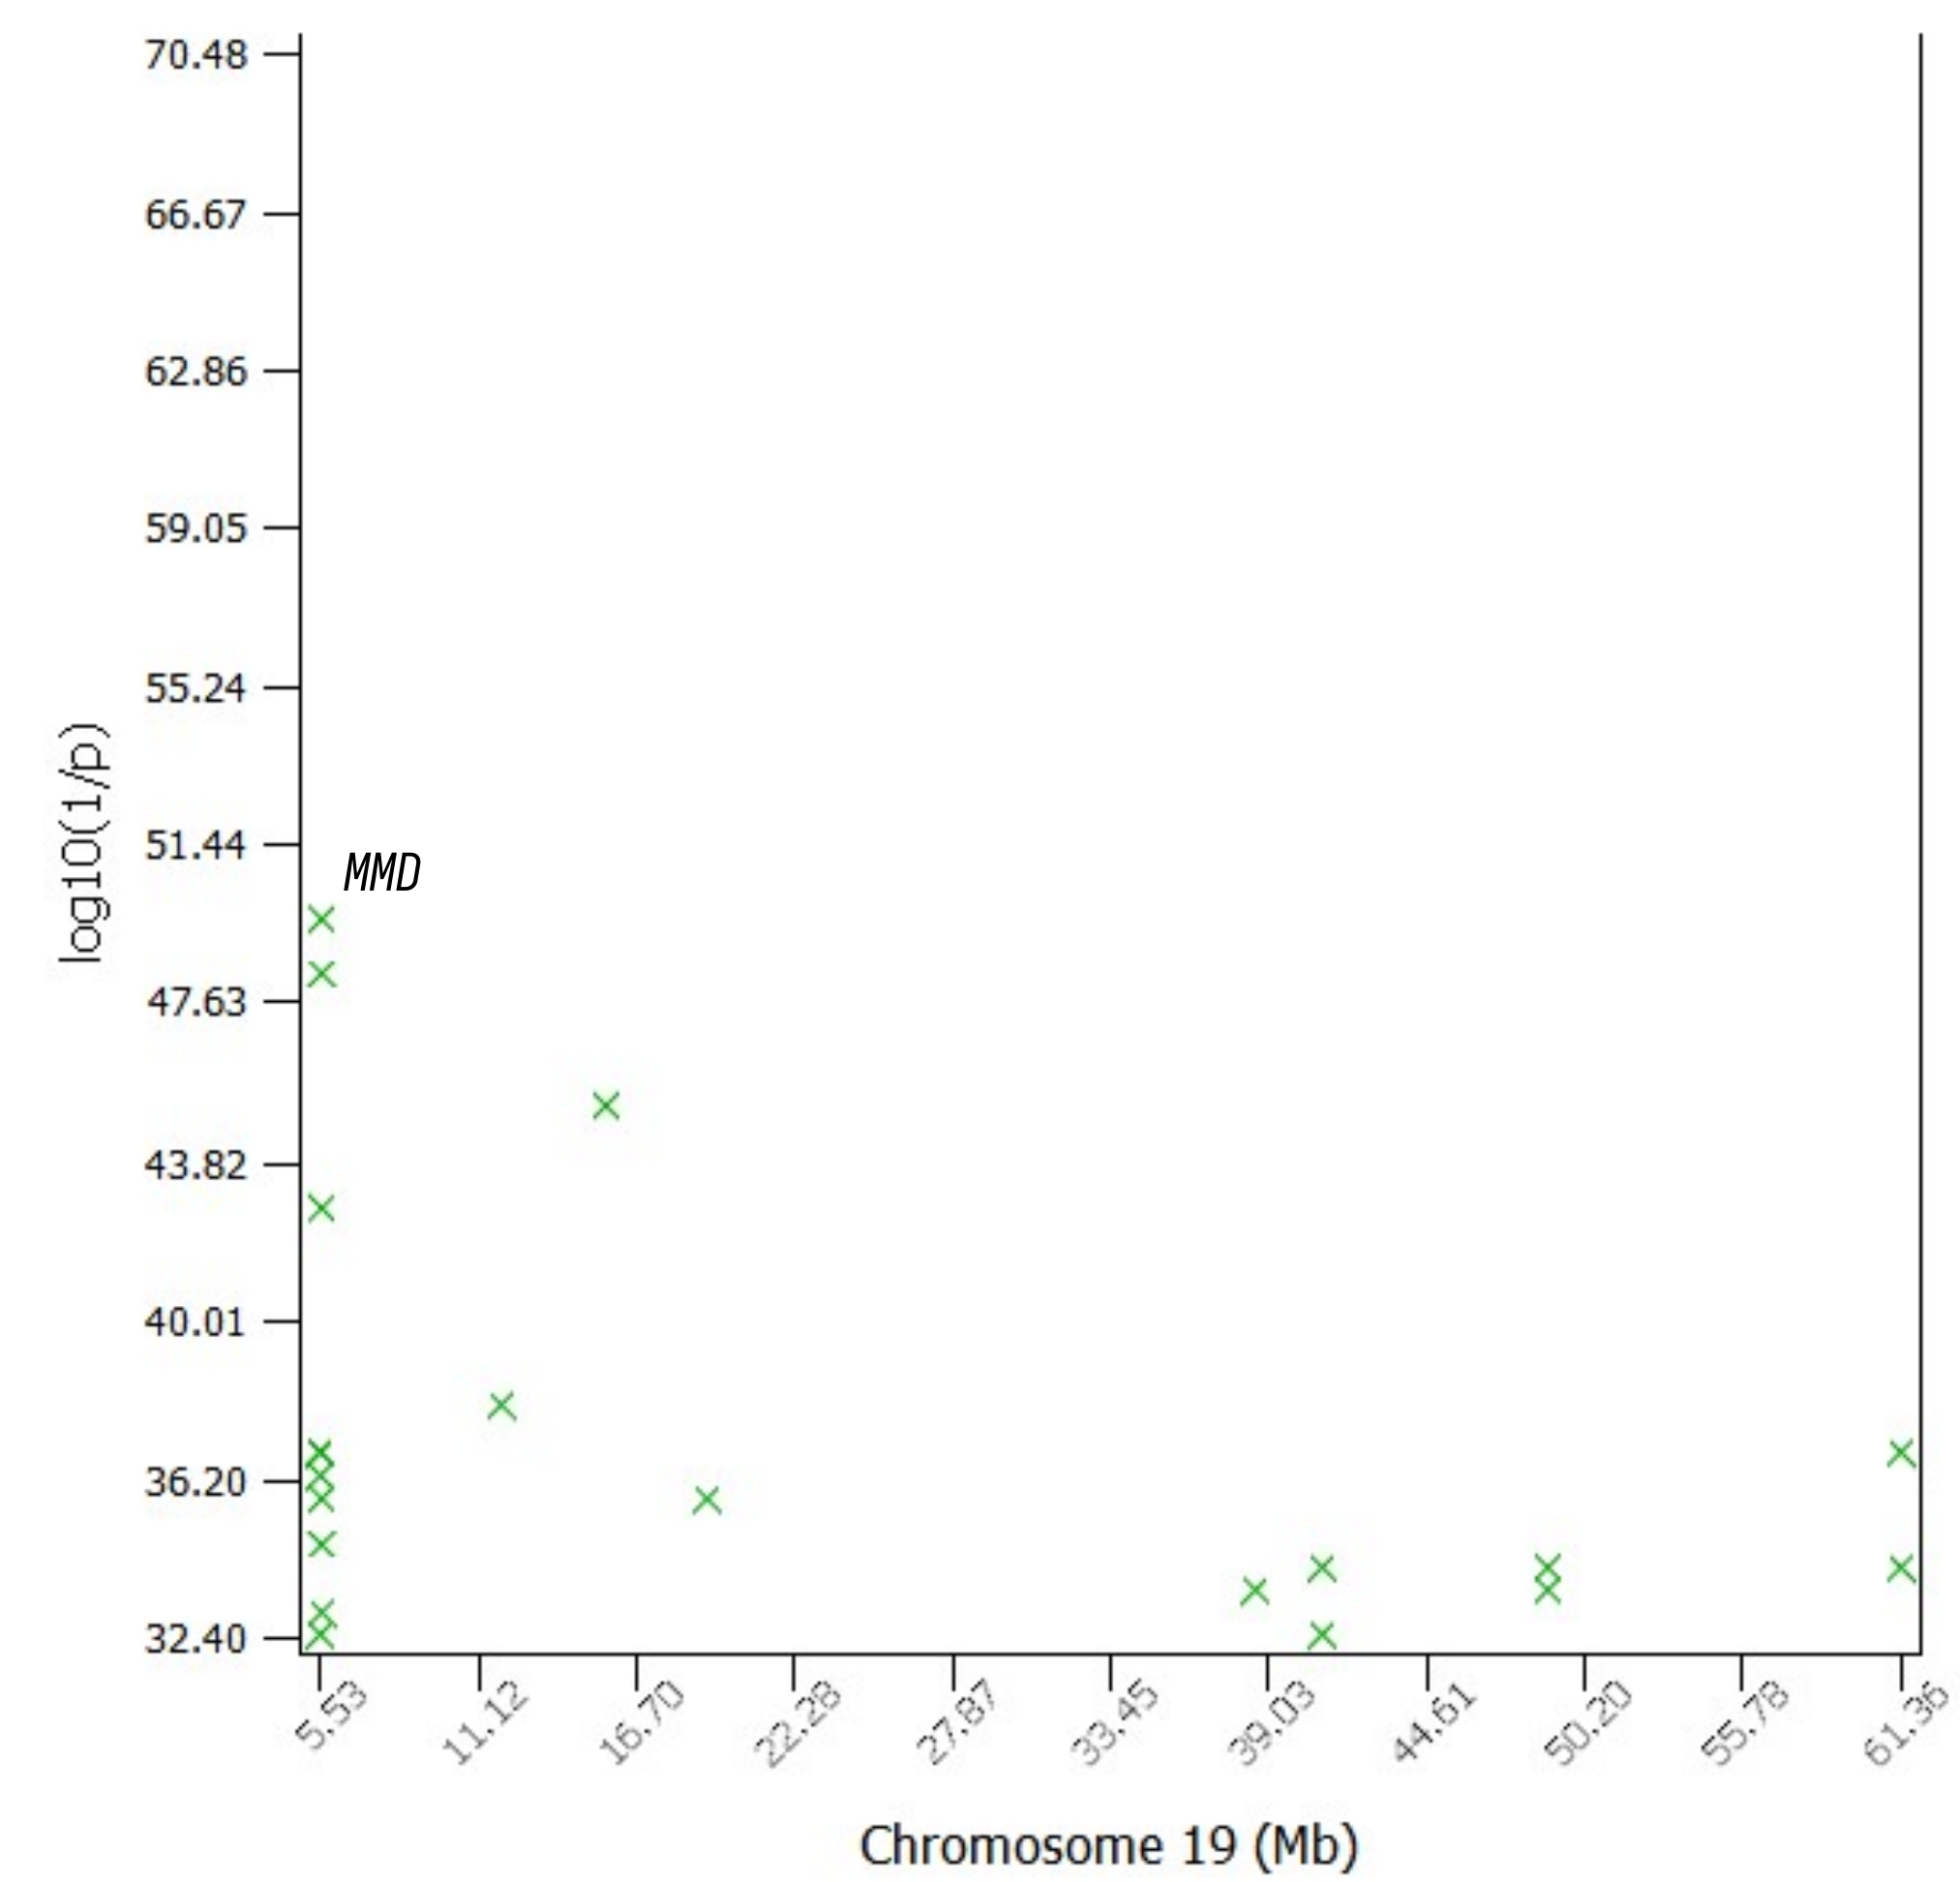



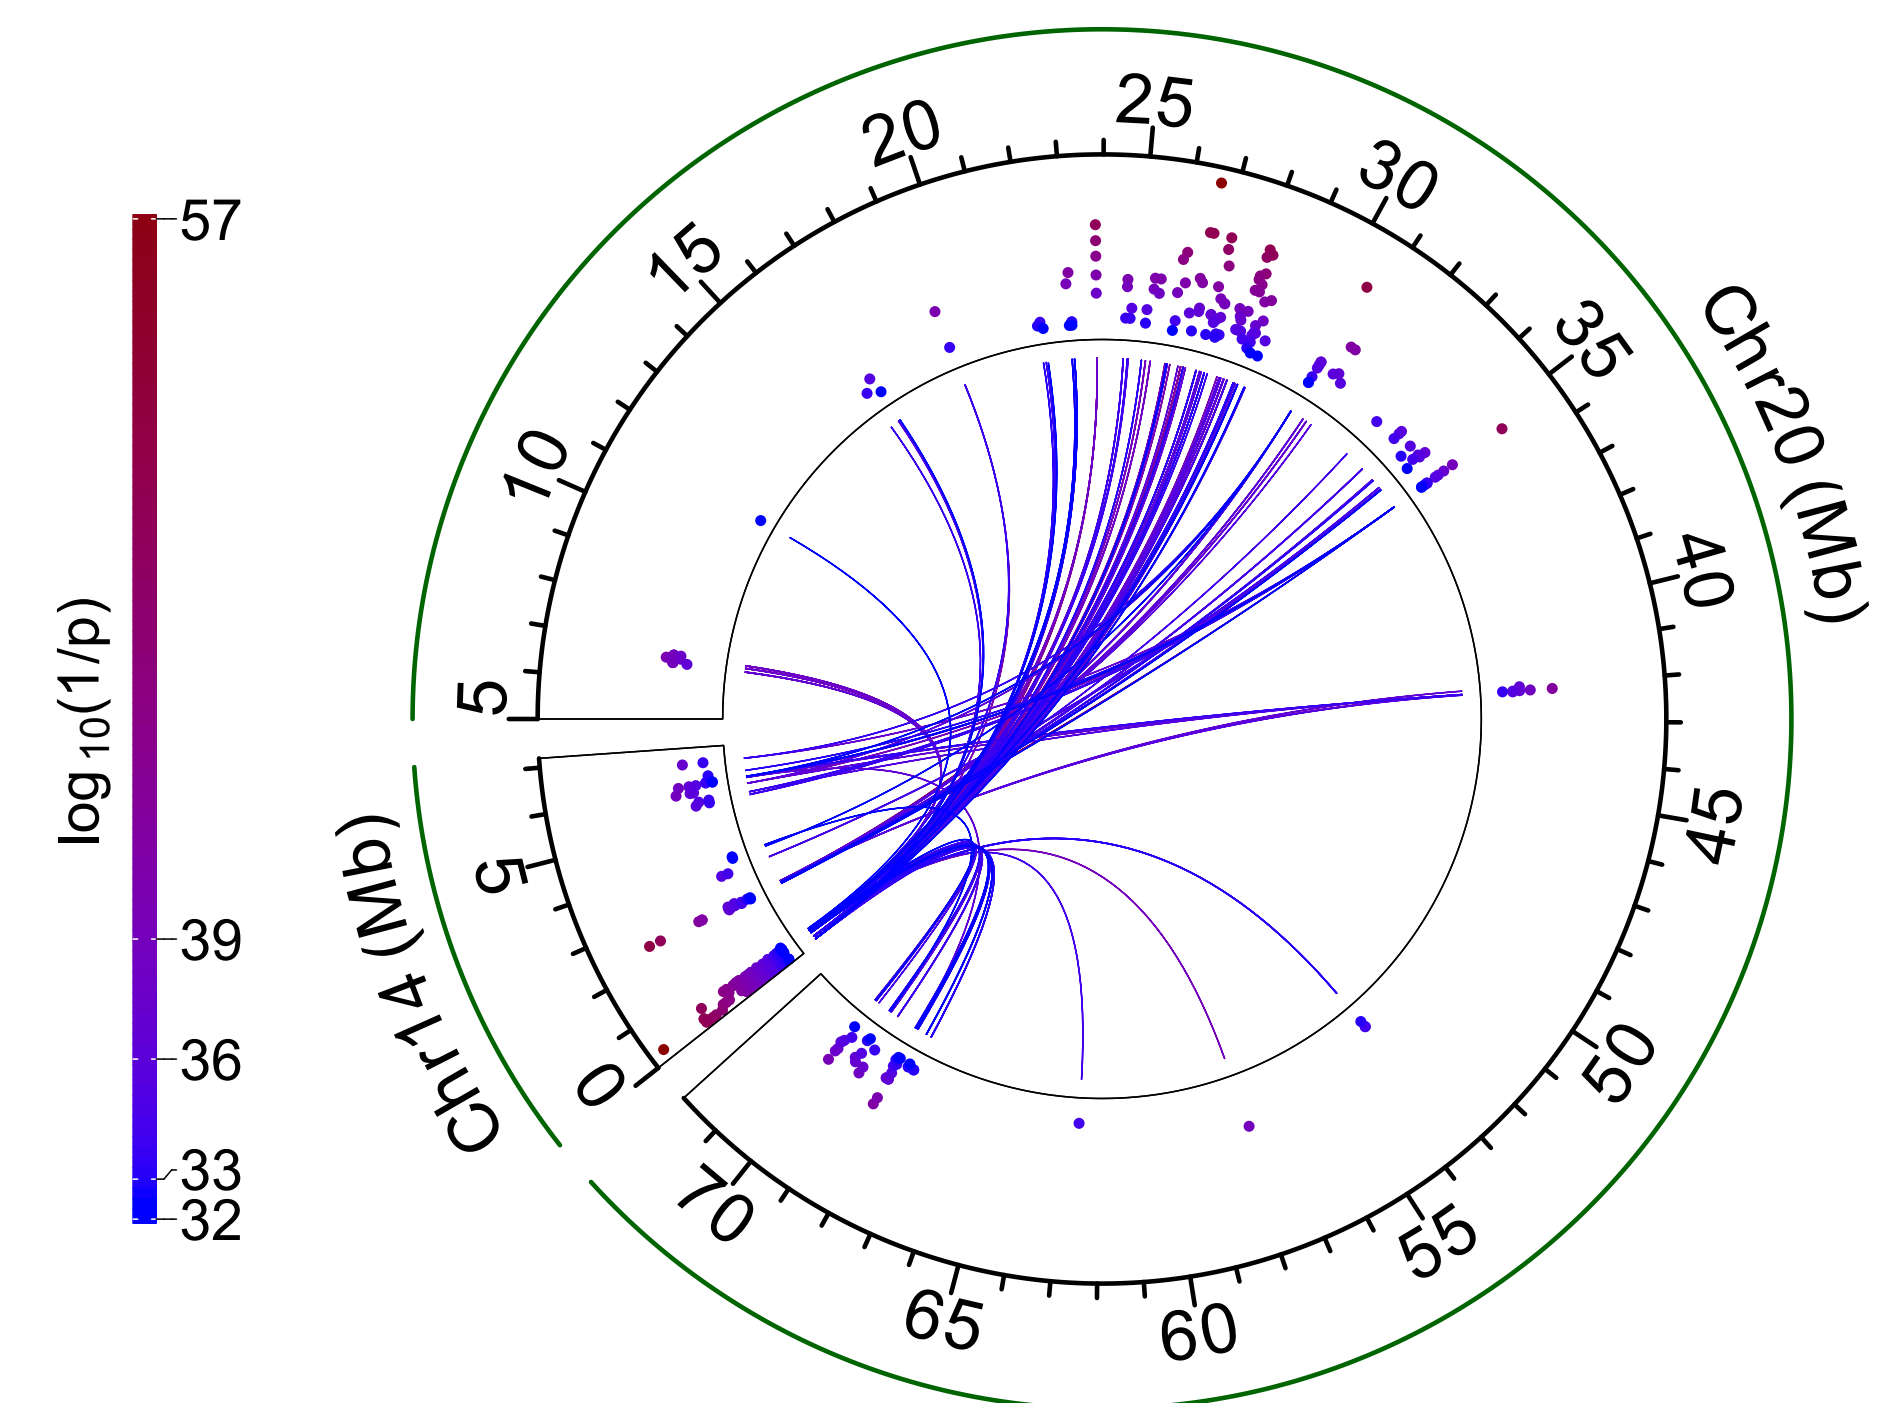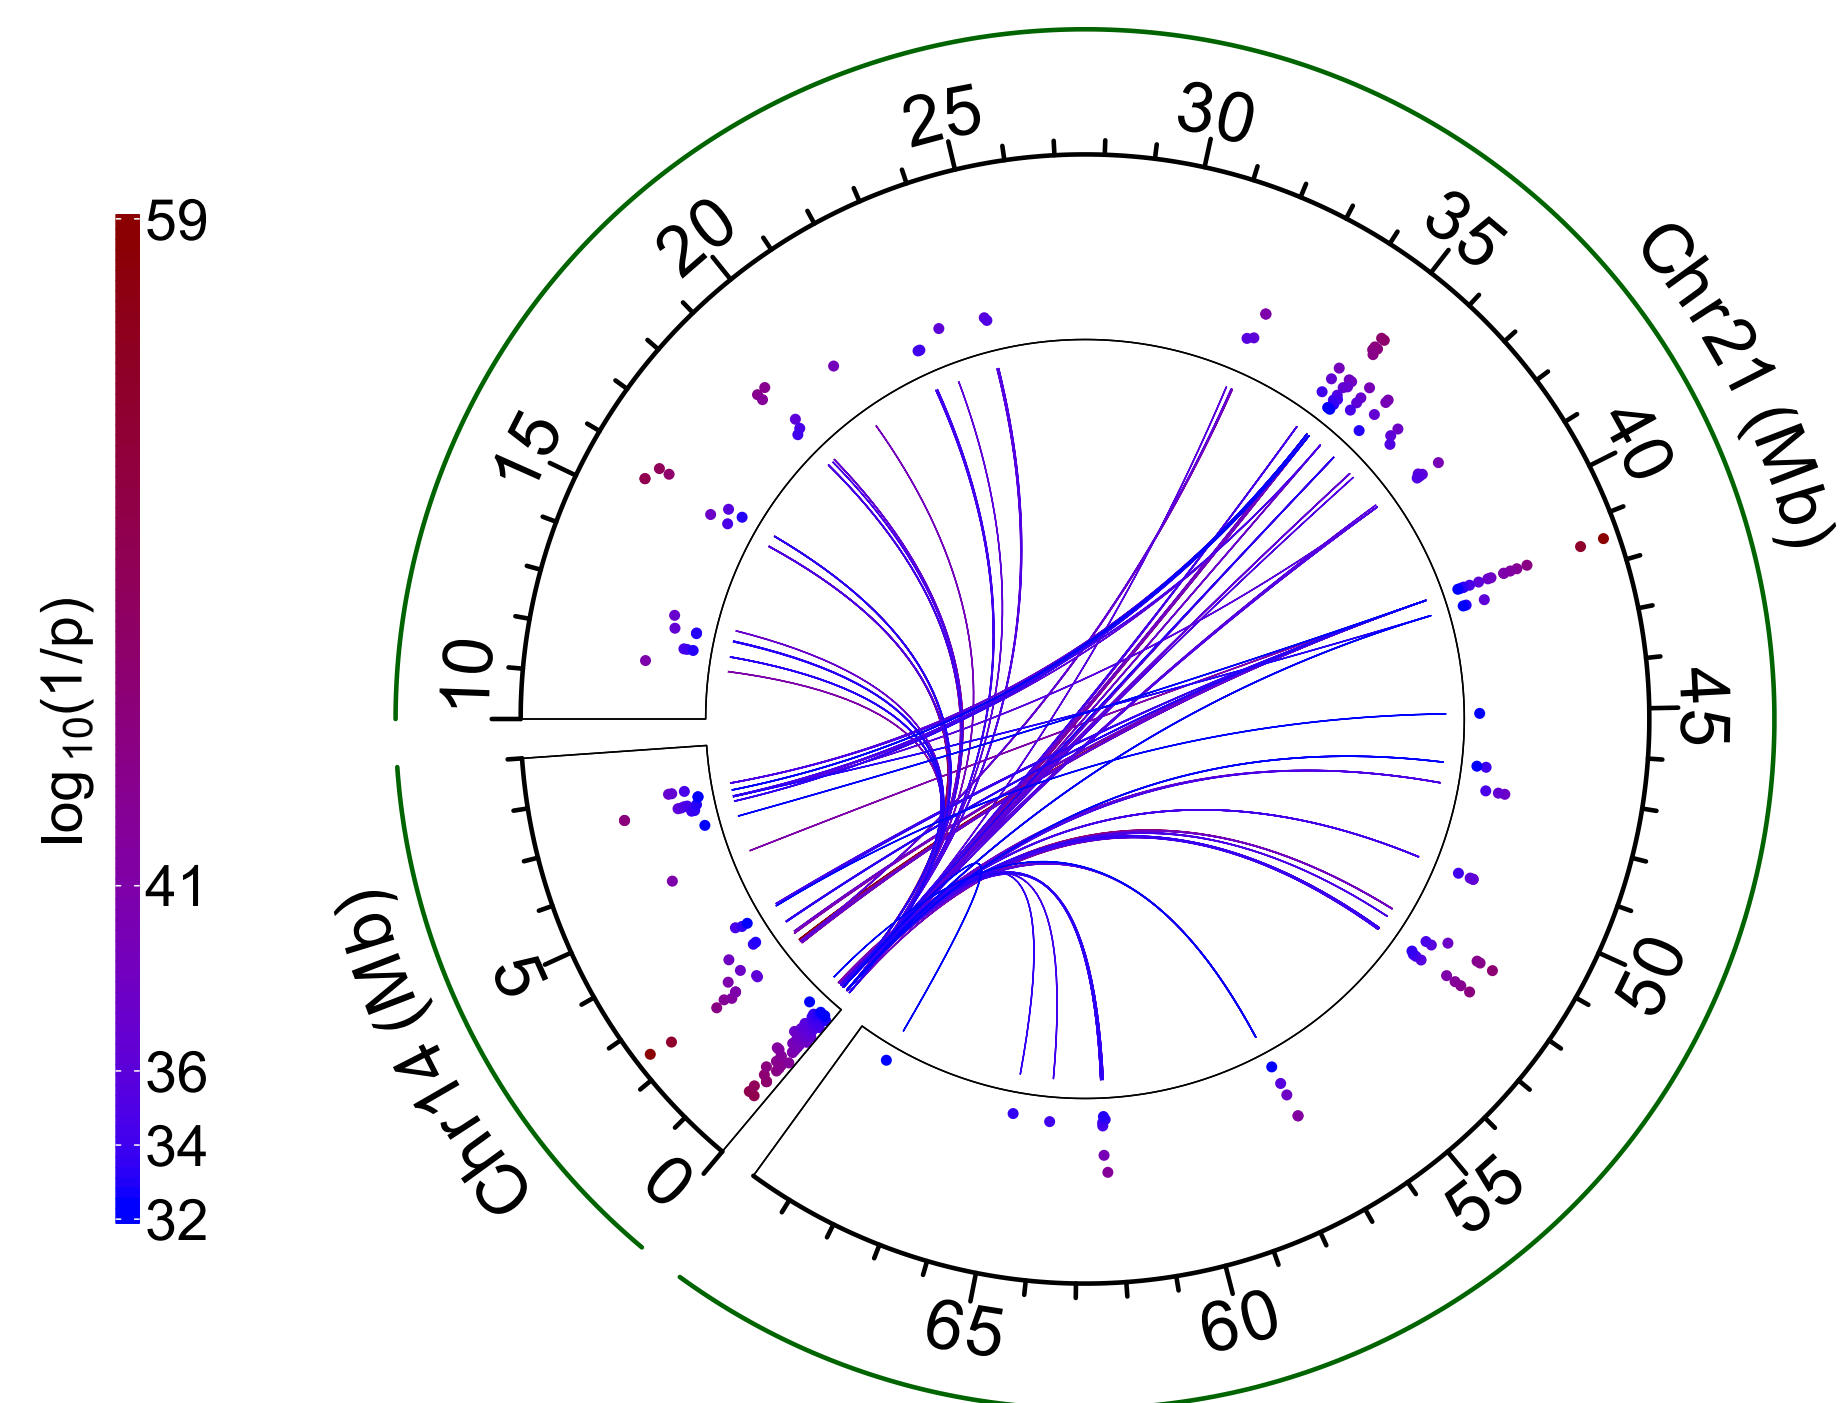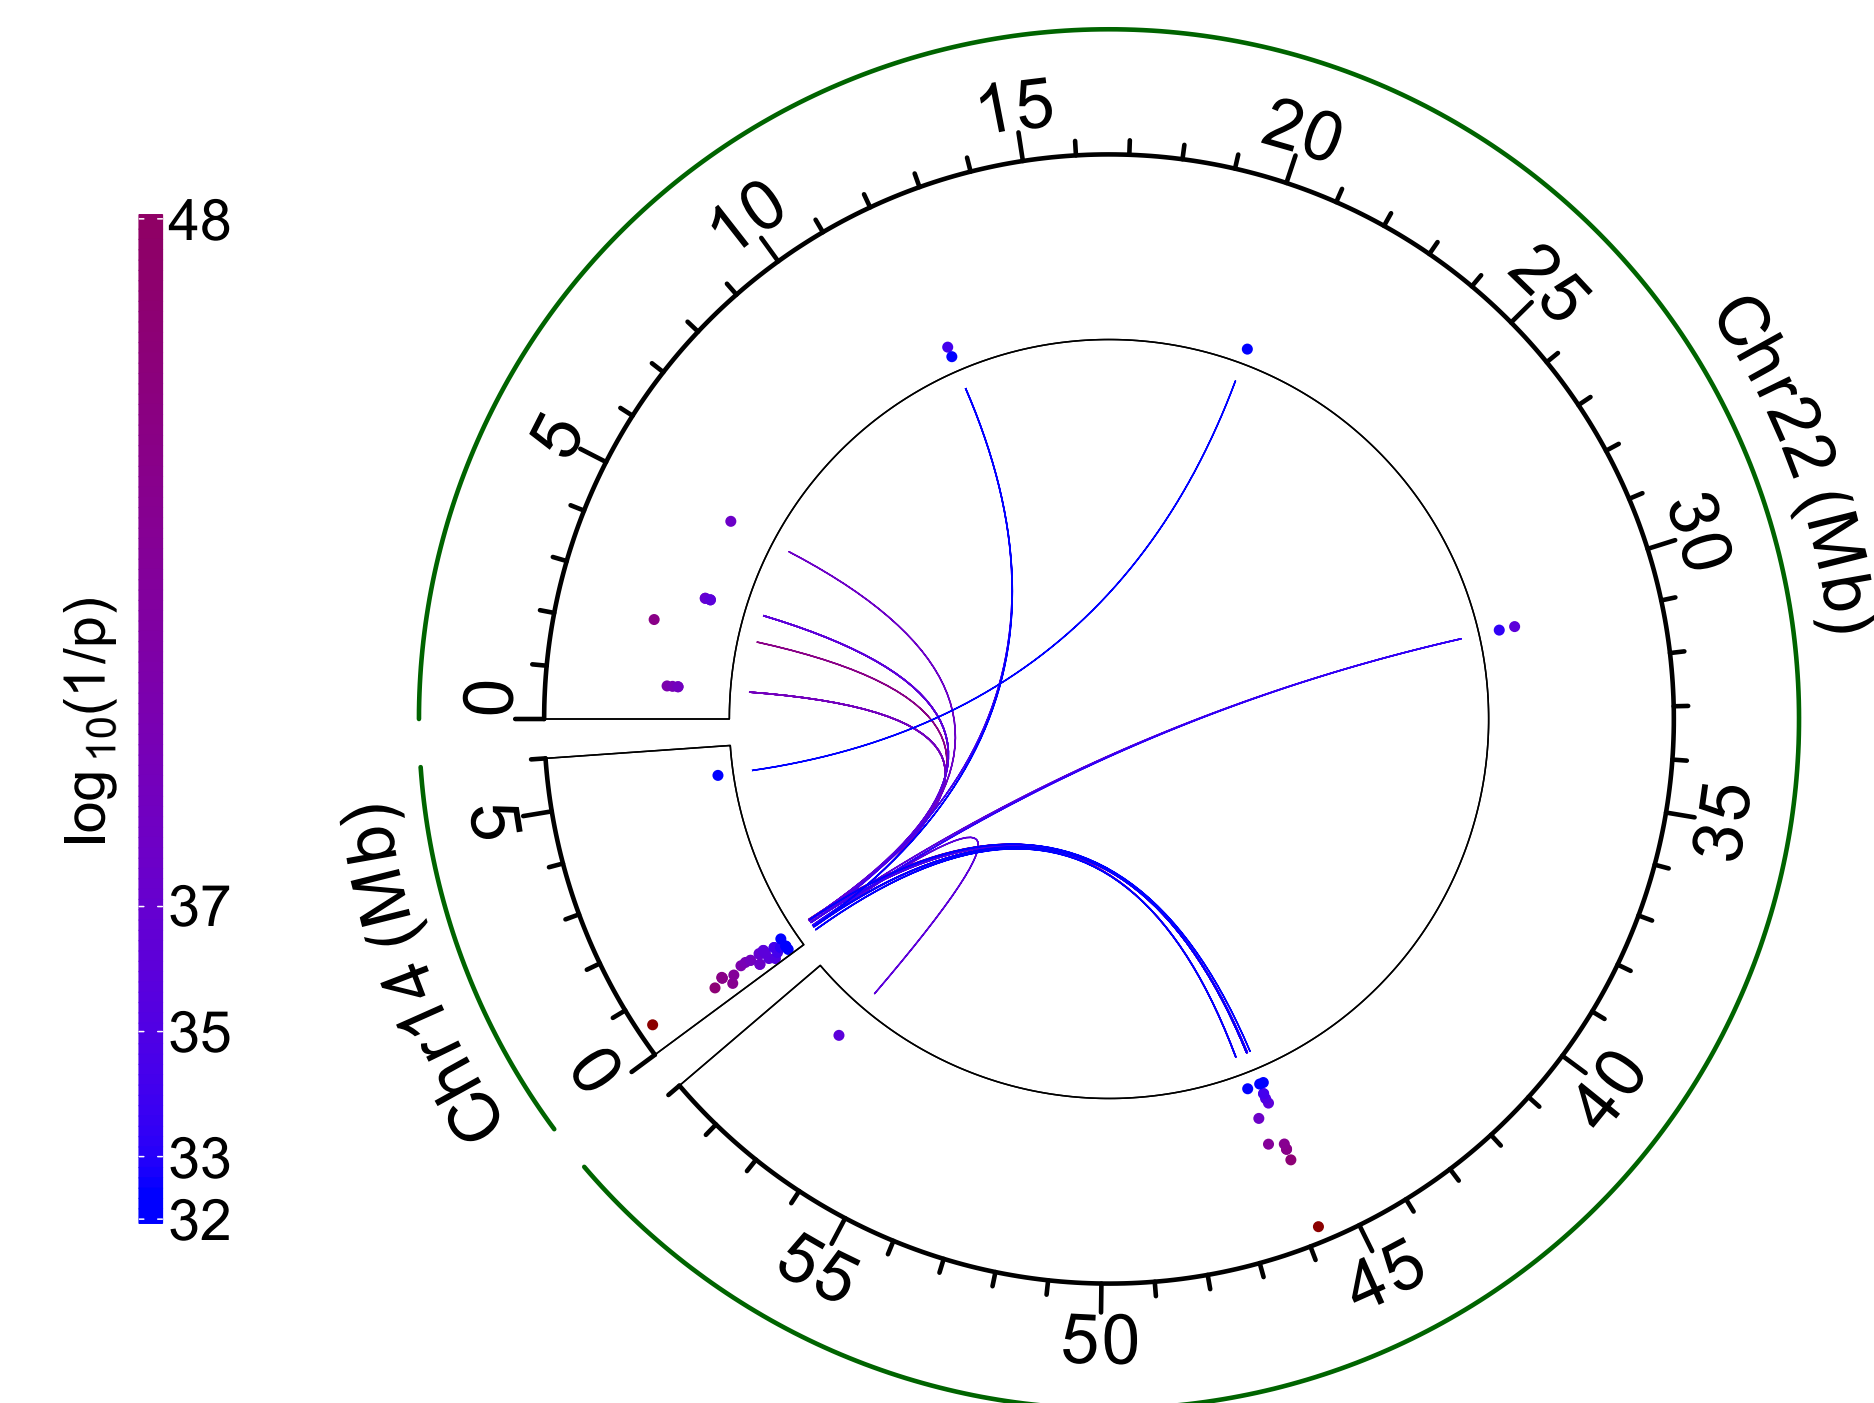

× AxA effect

× AxA effect

× AxA effect

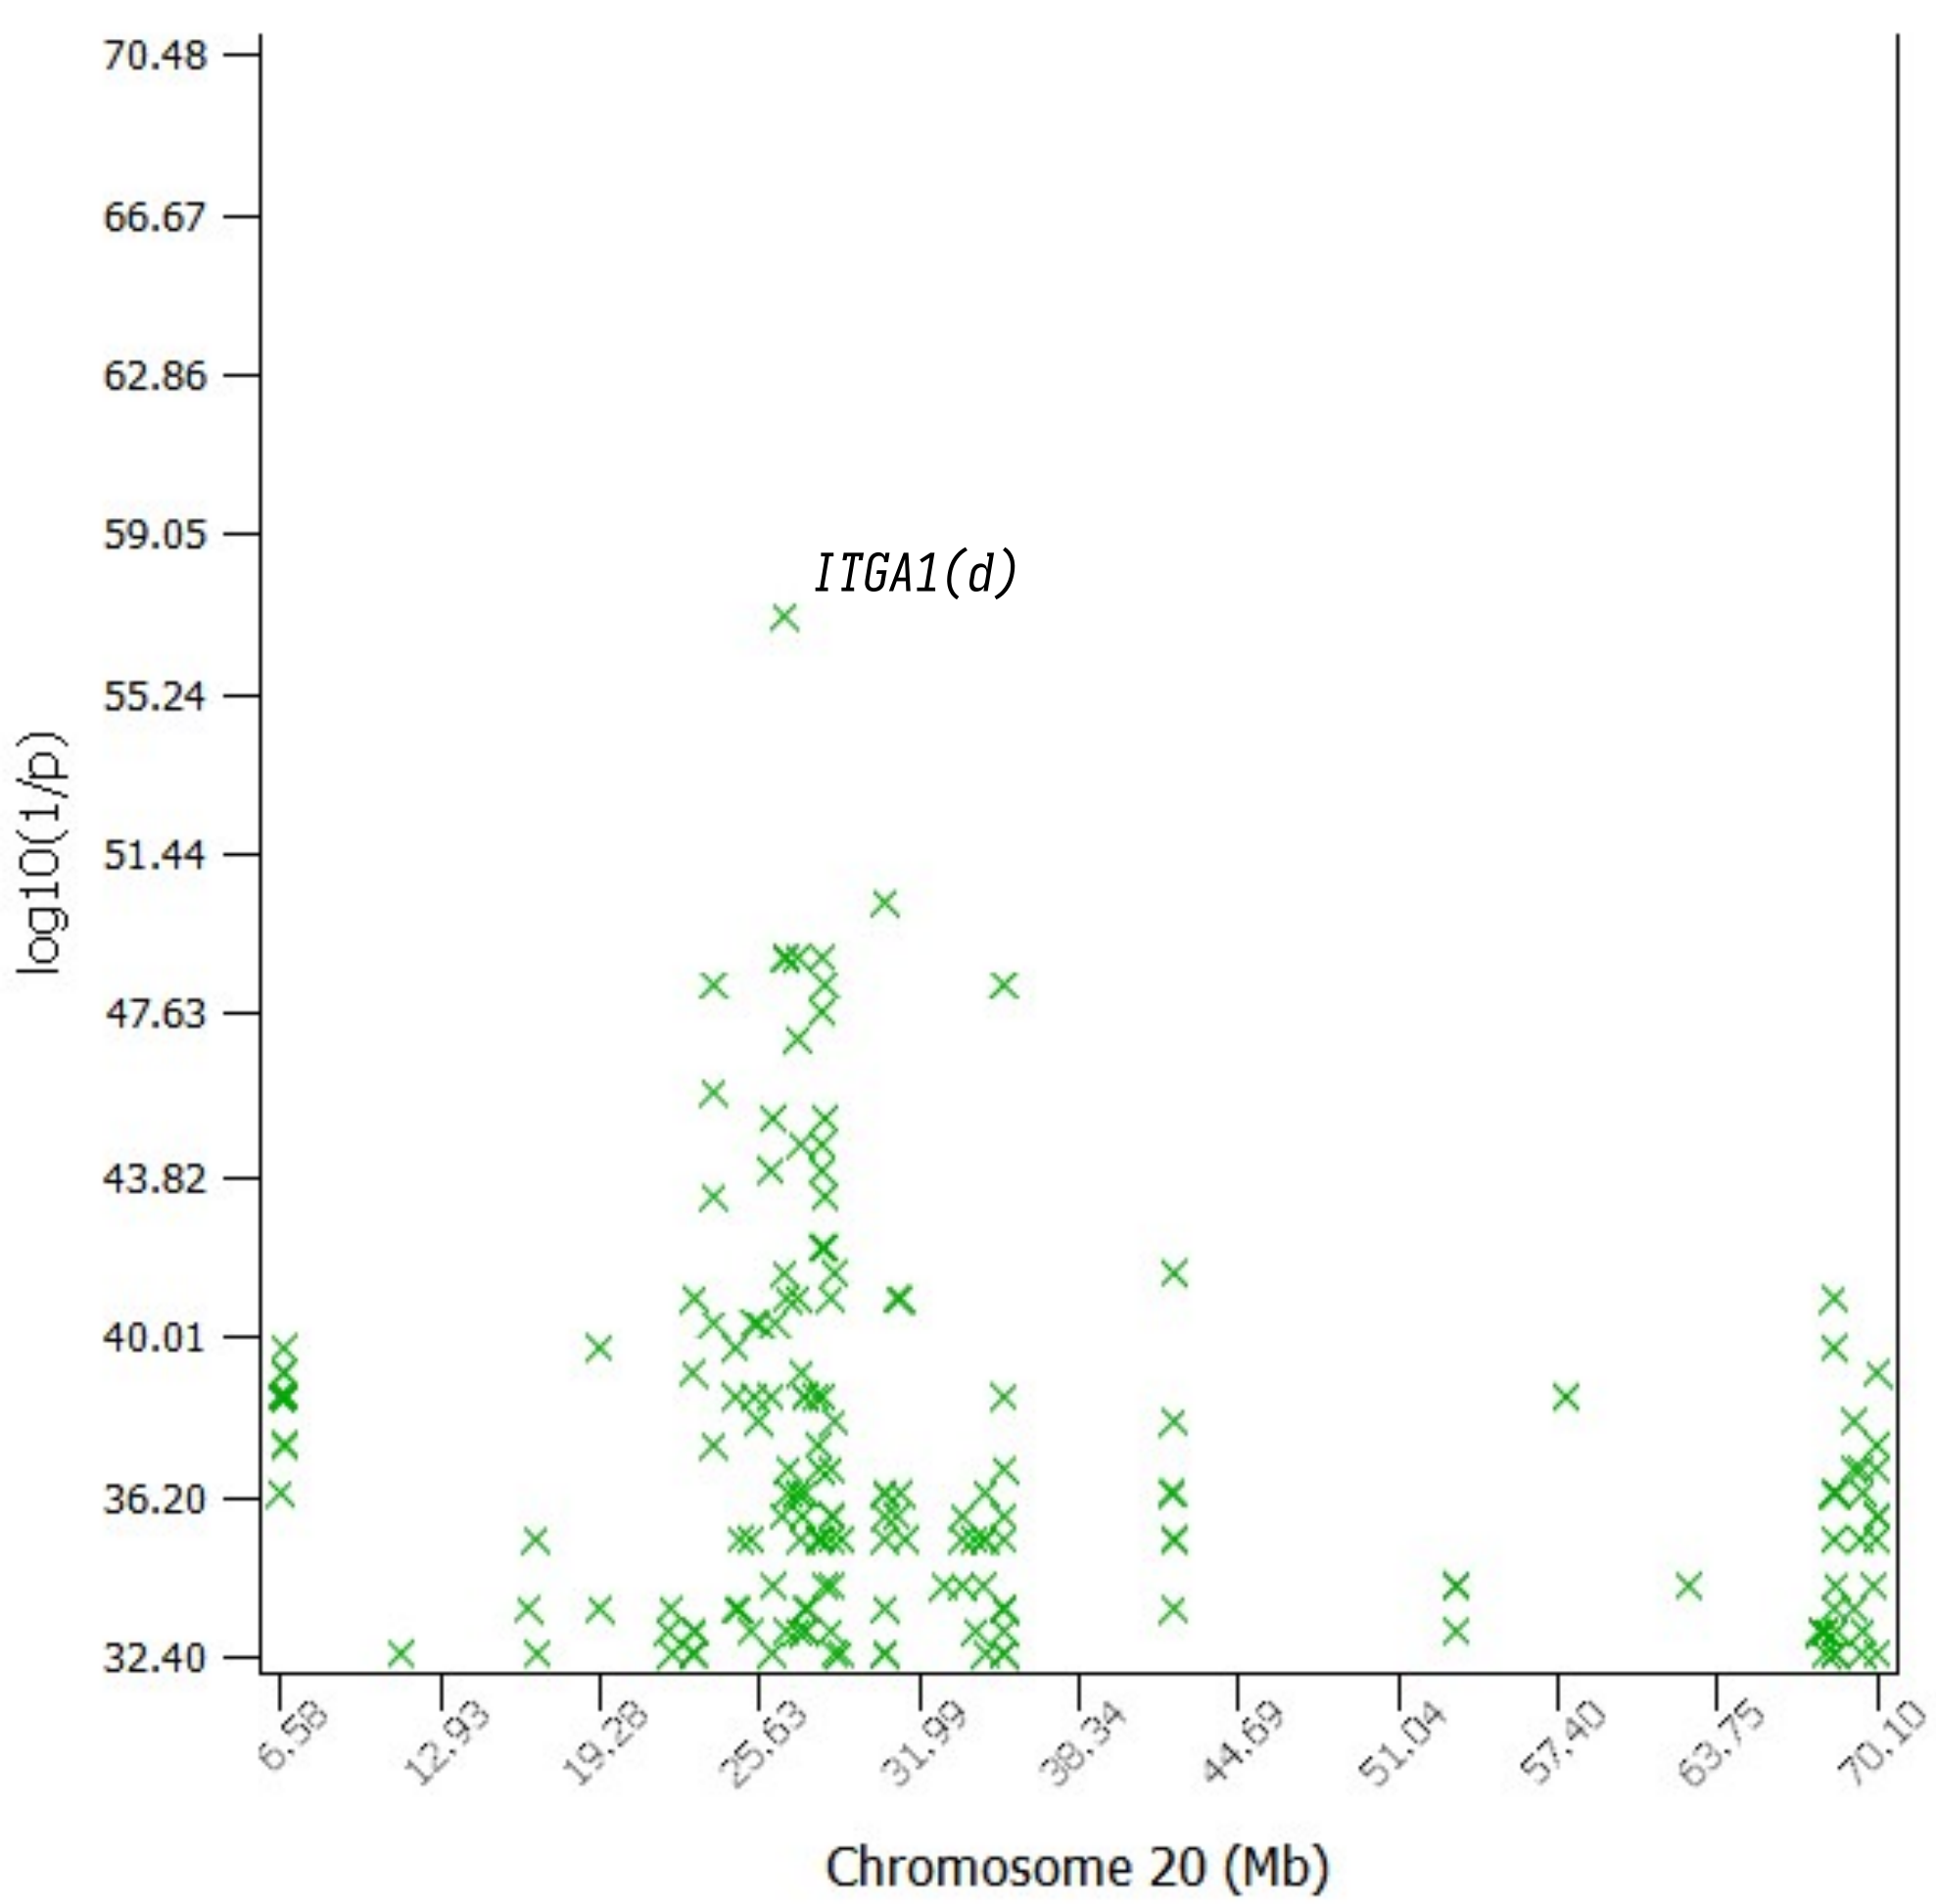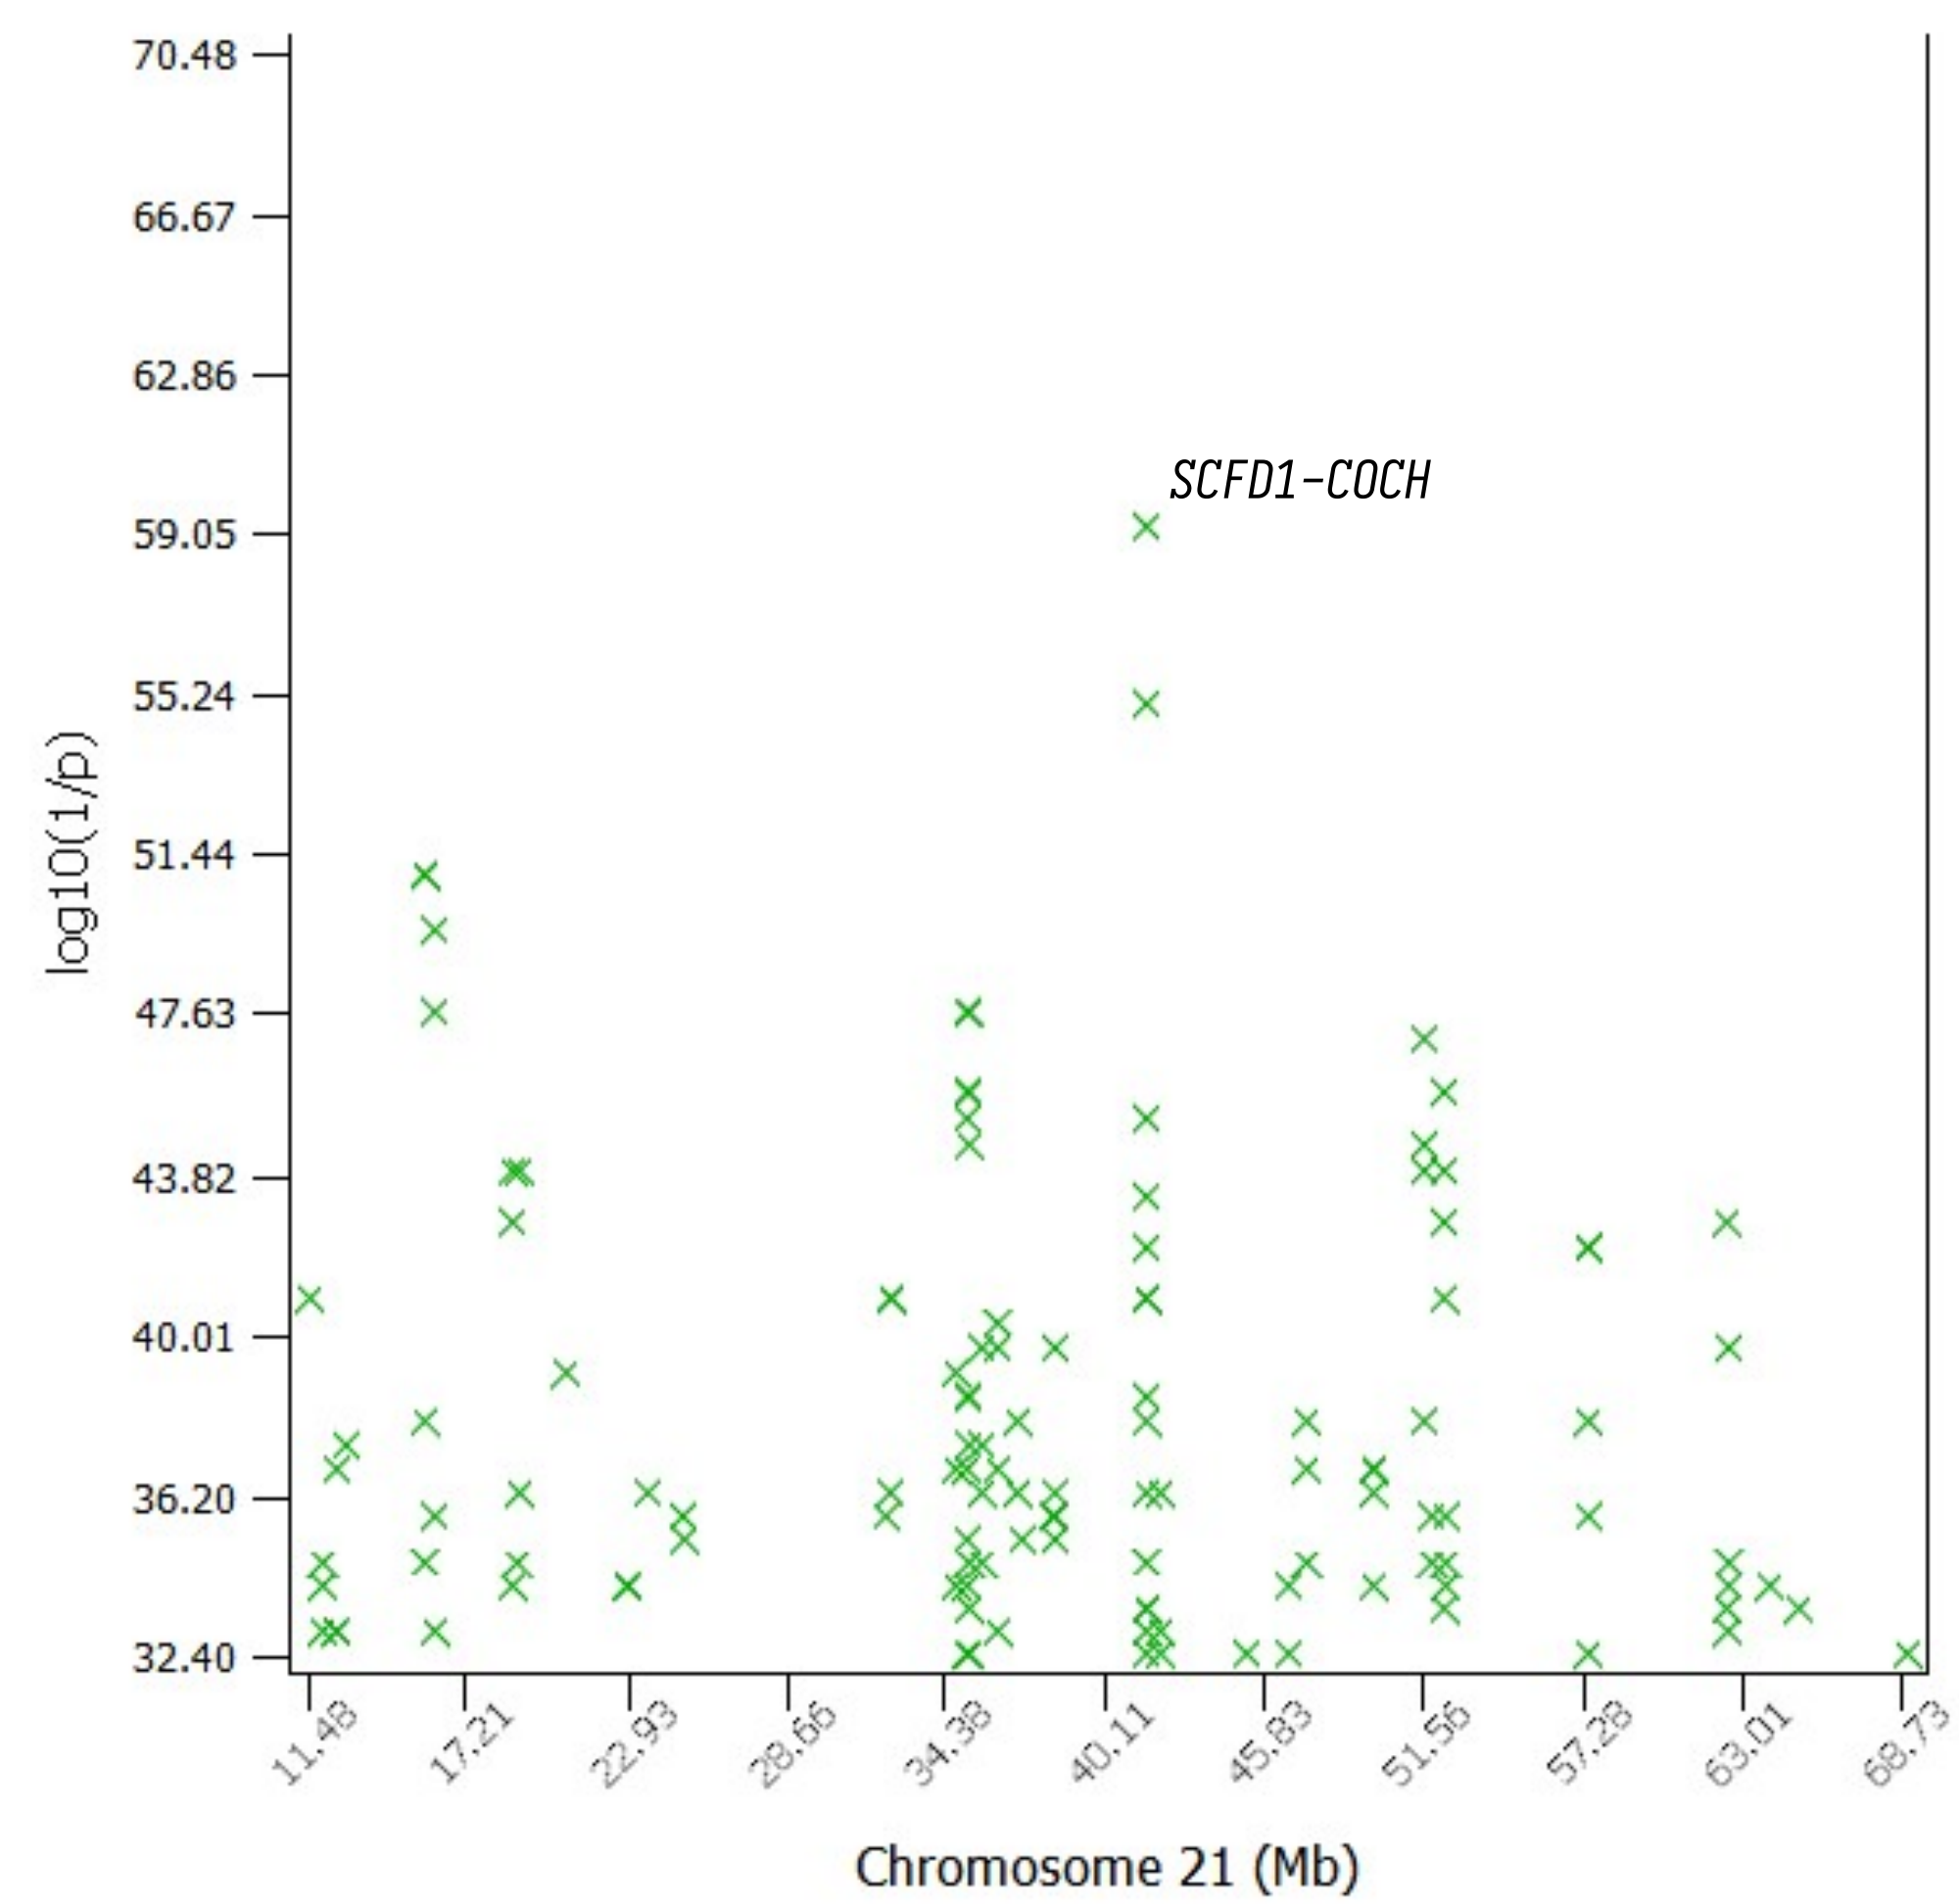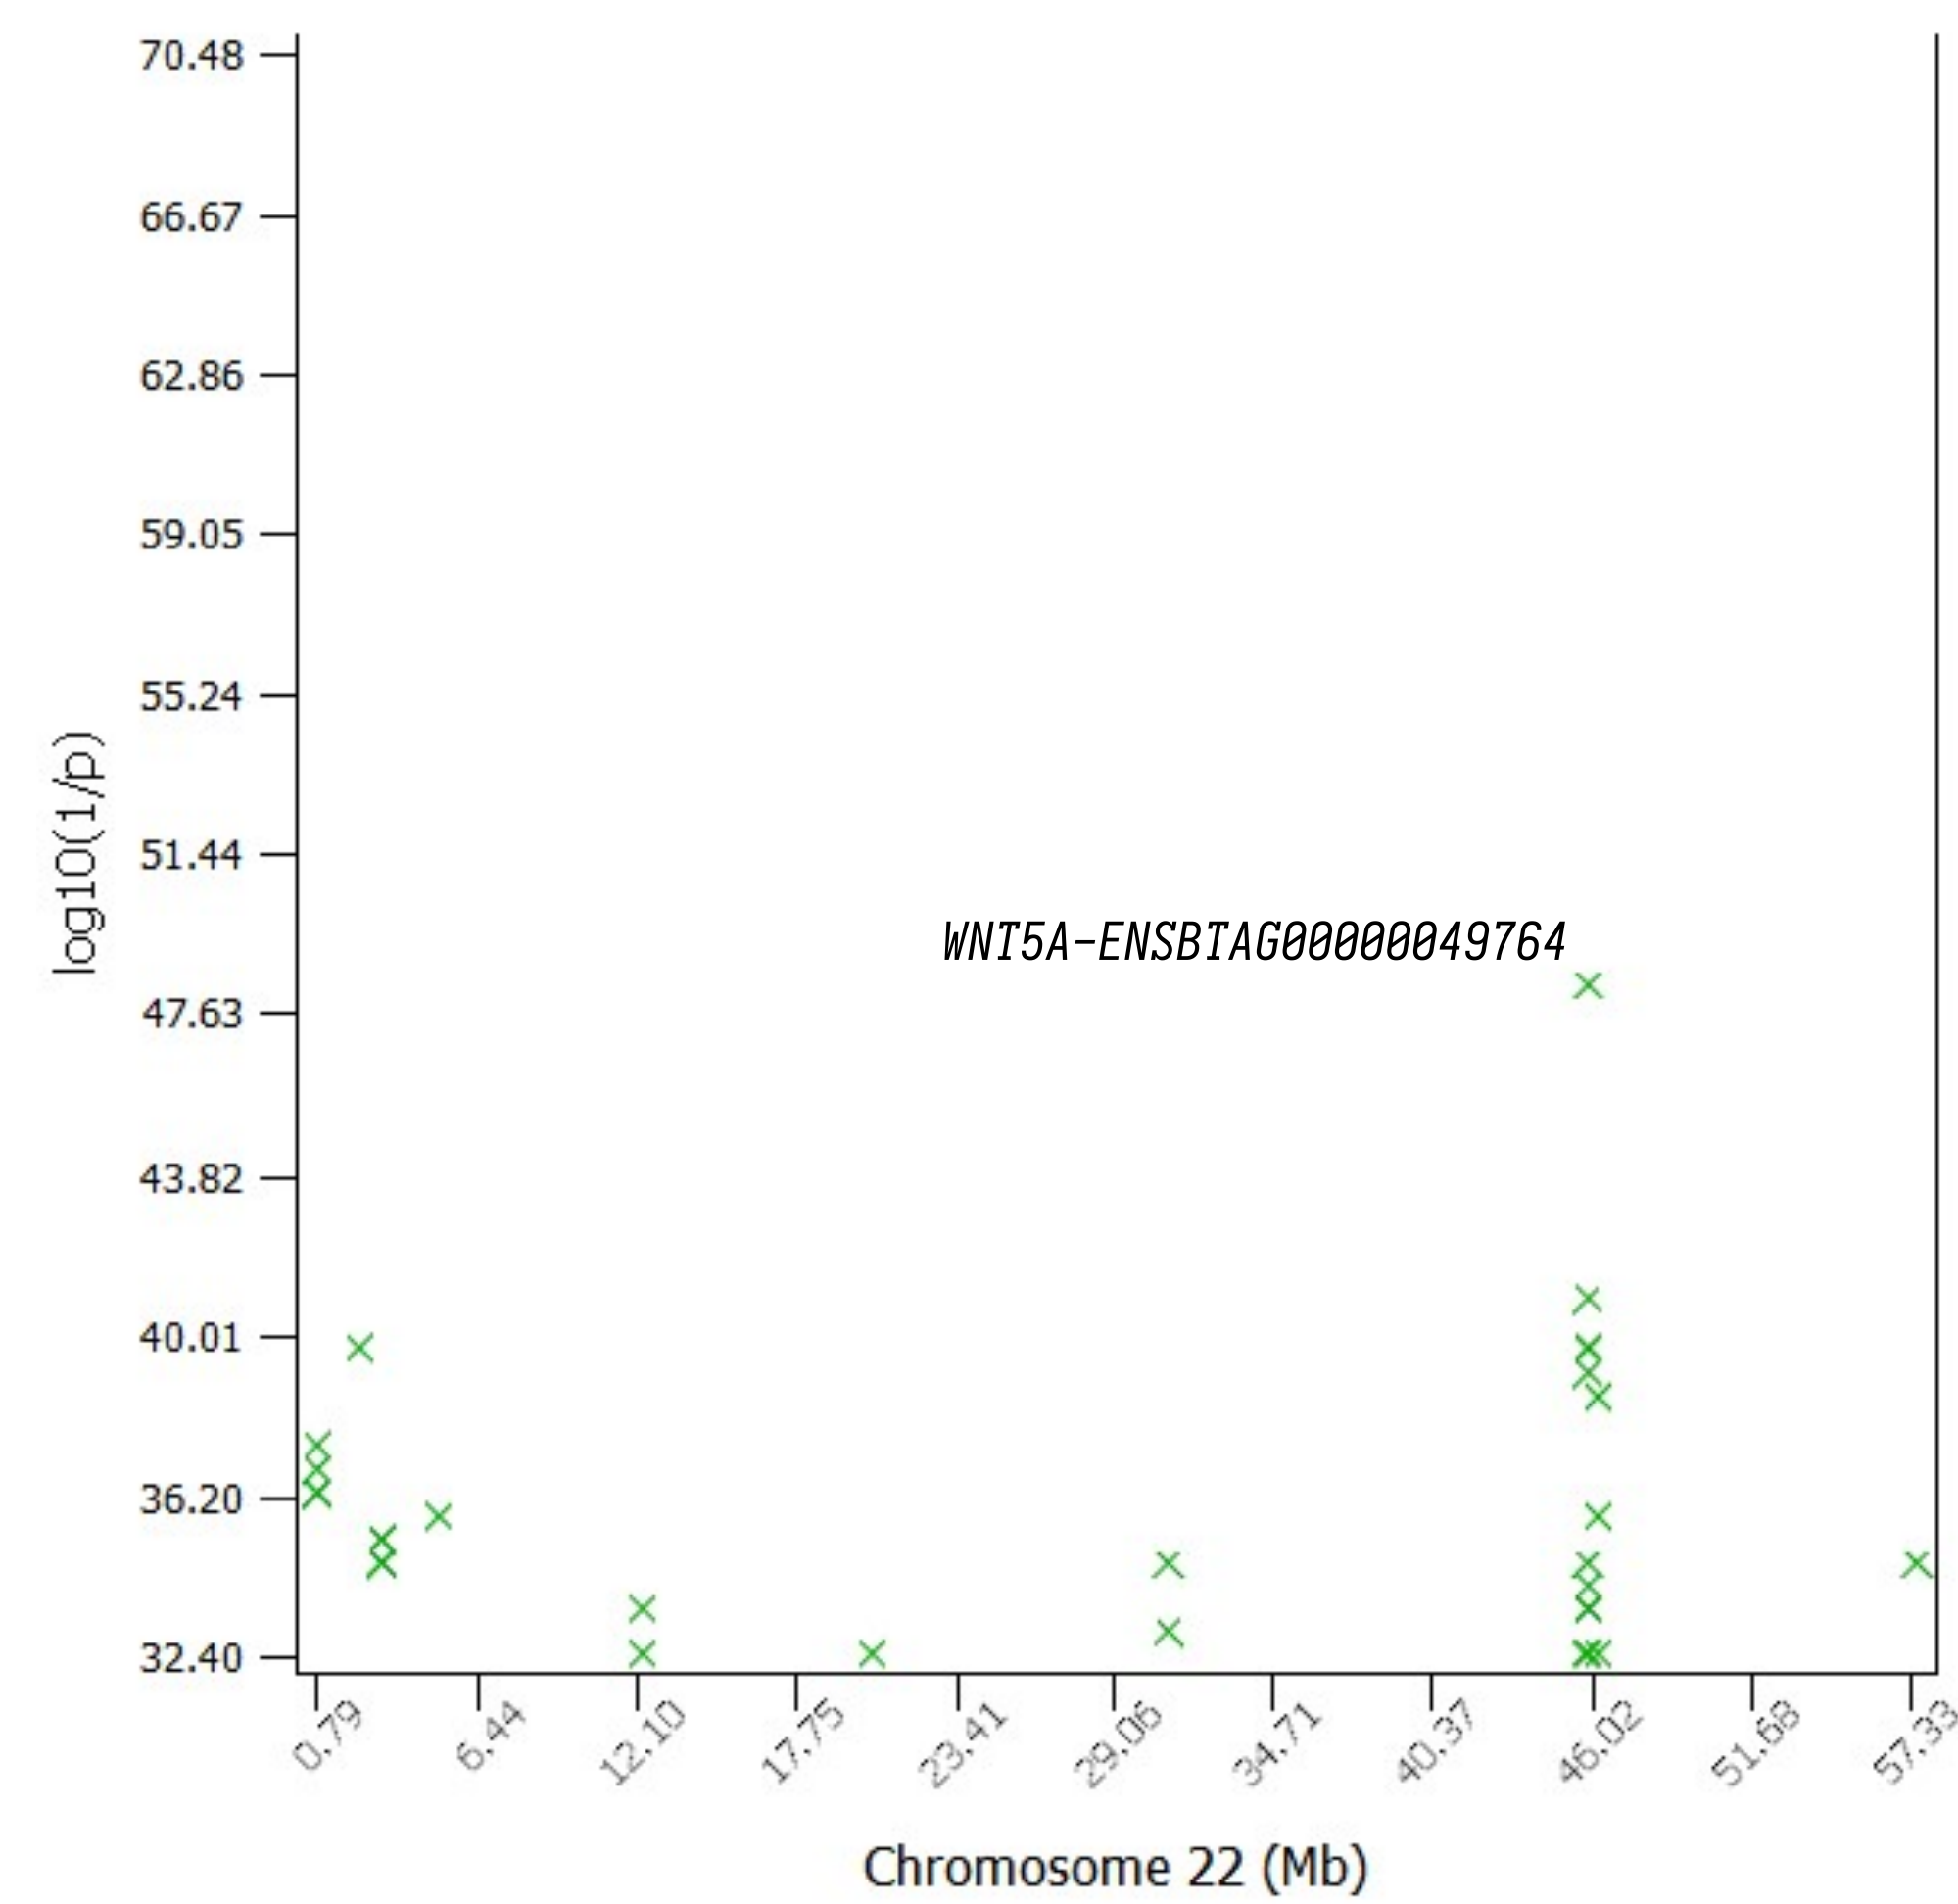



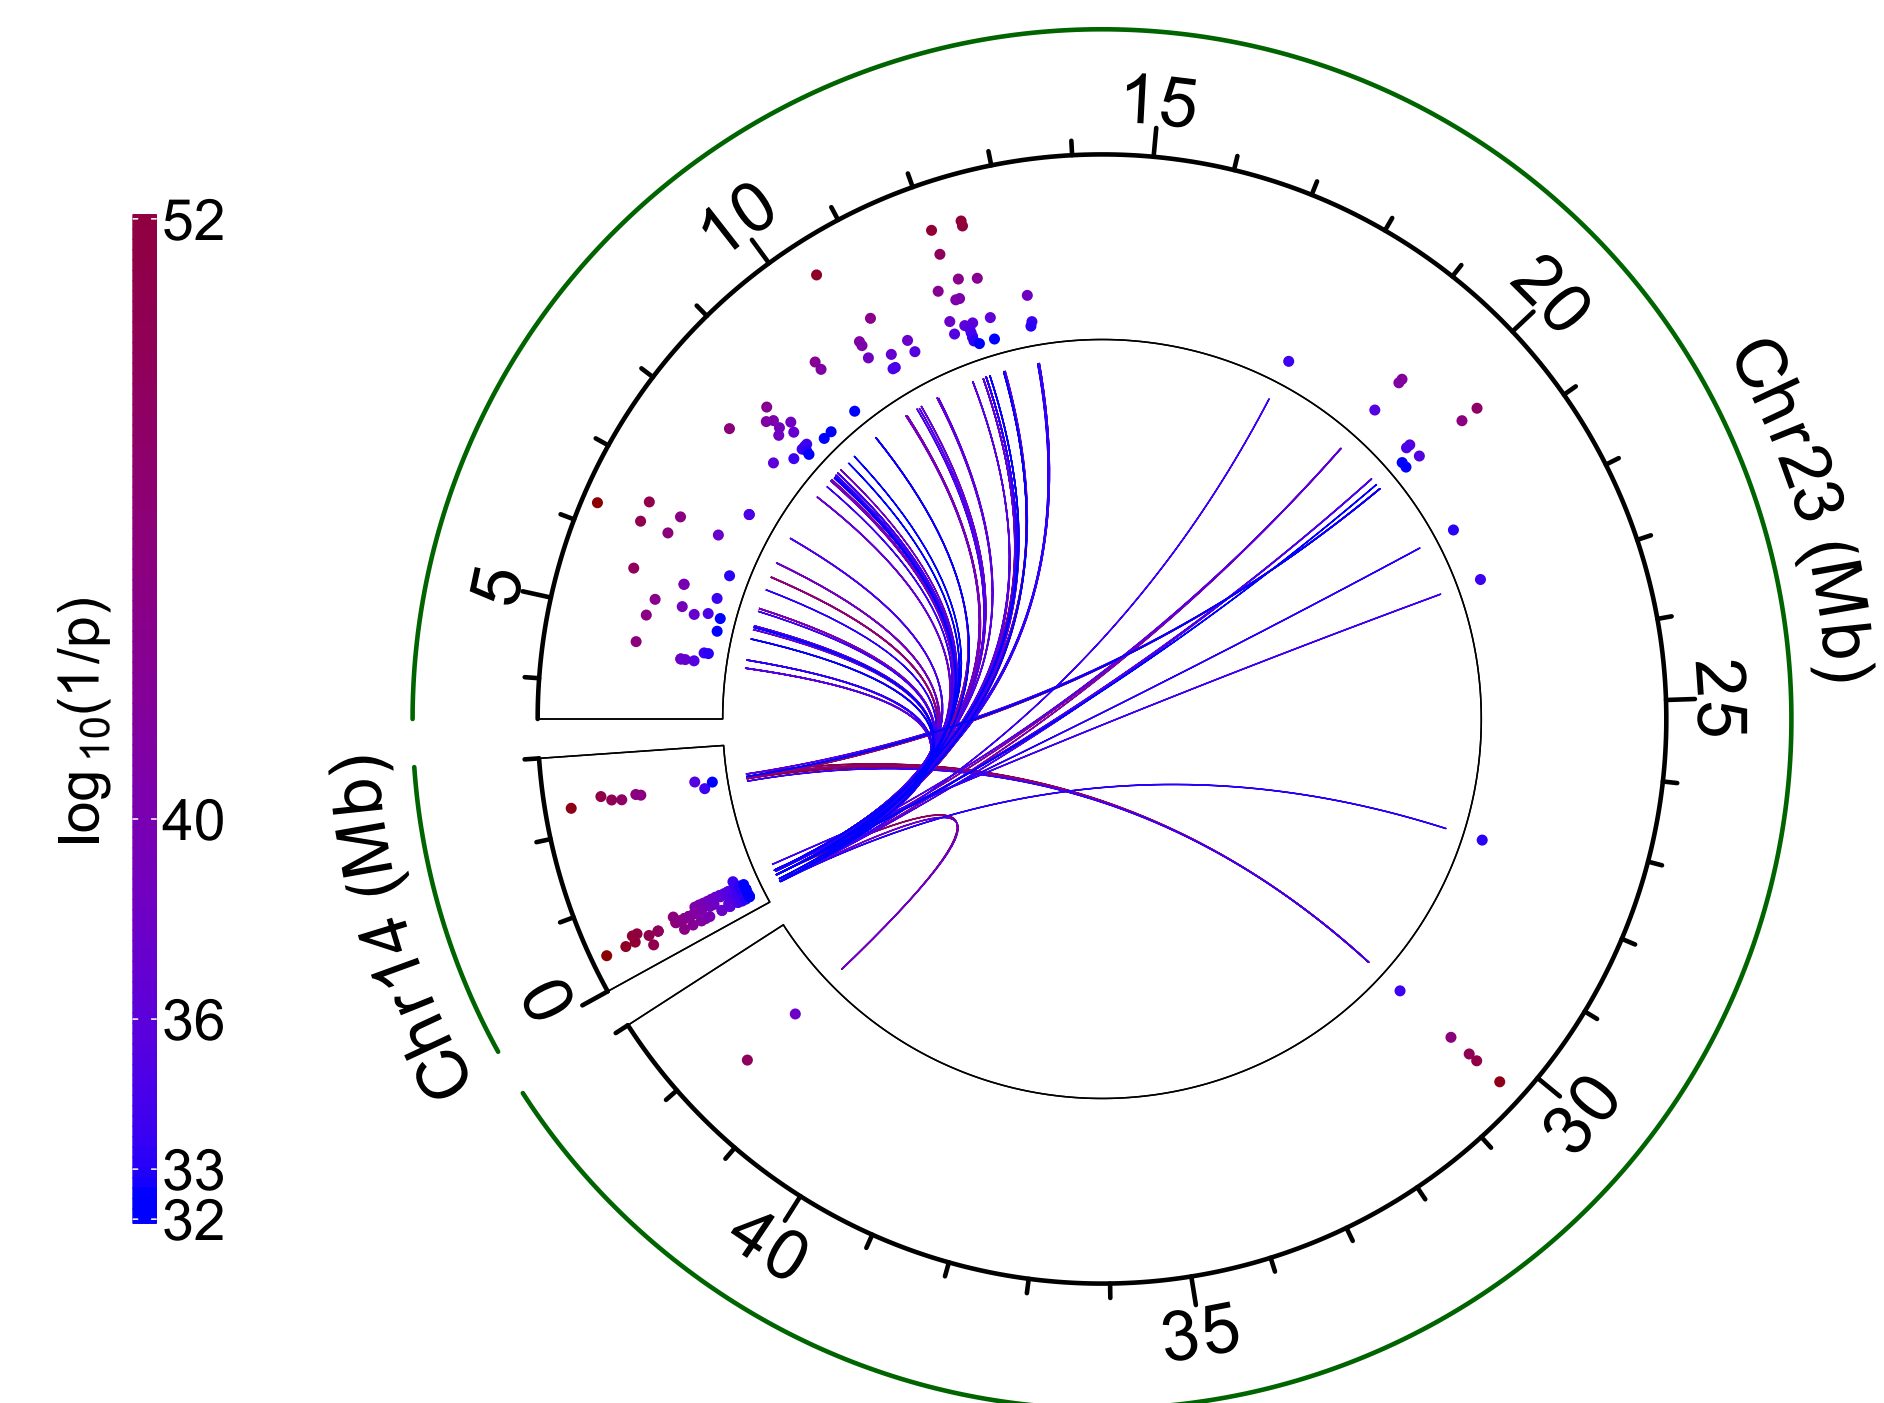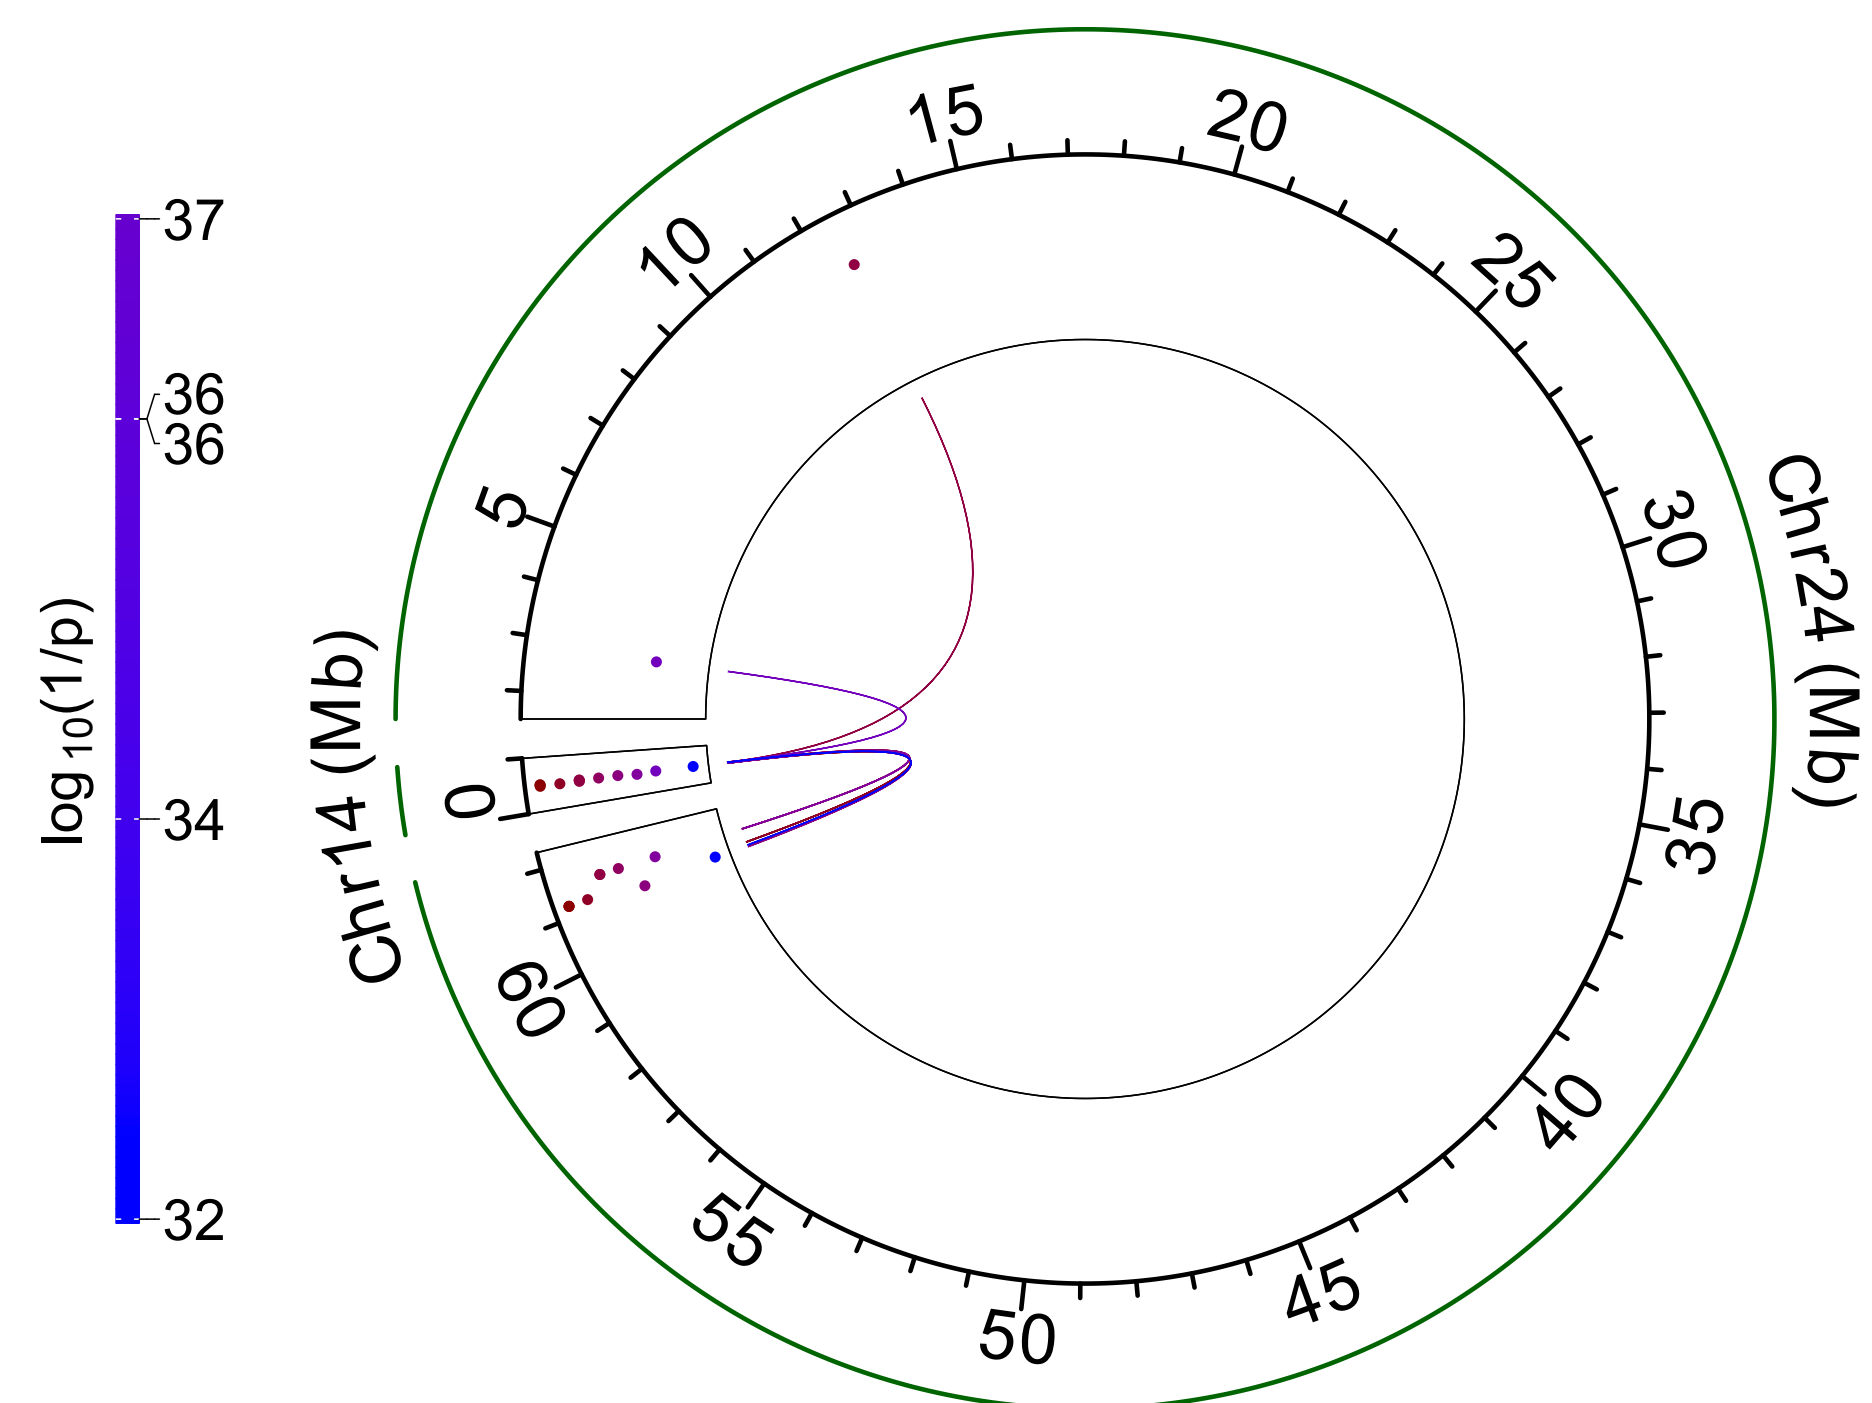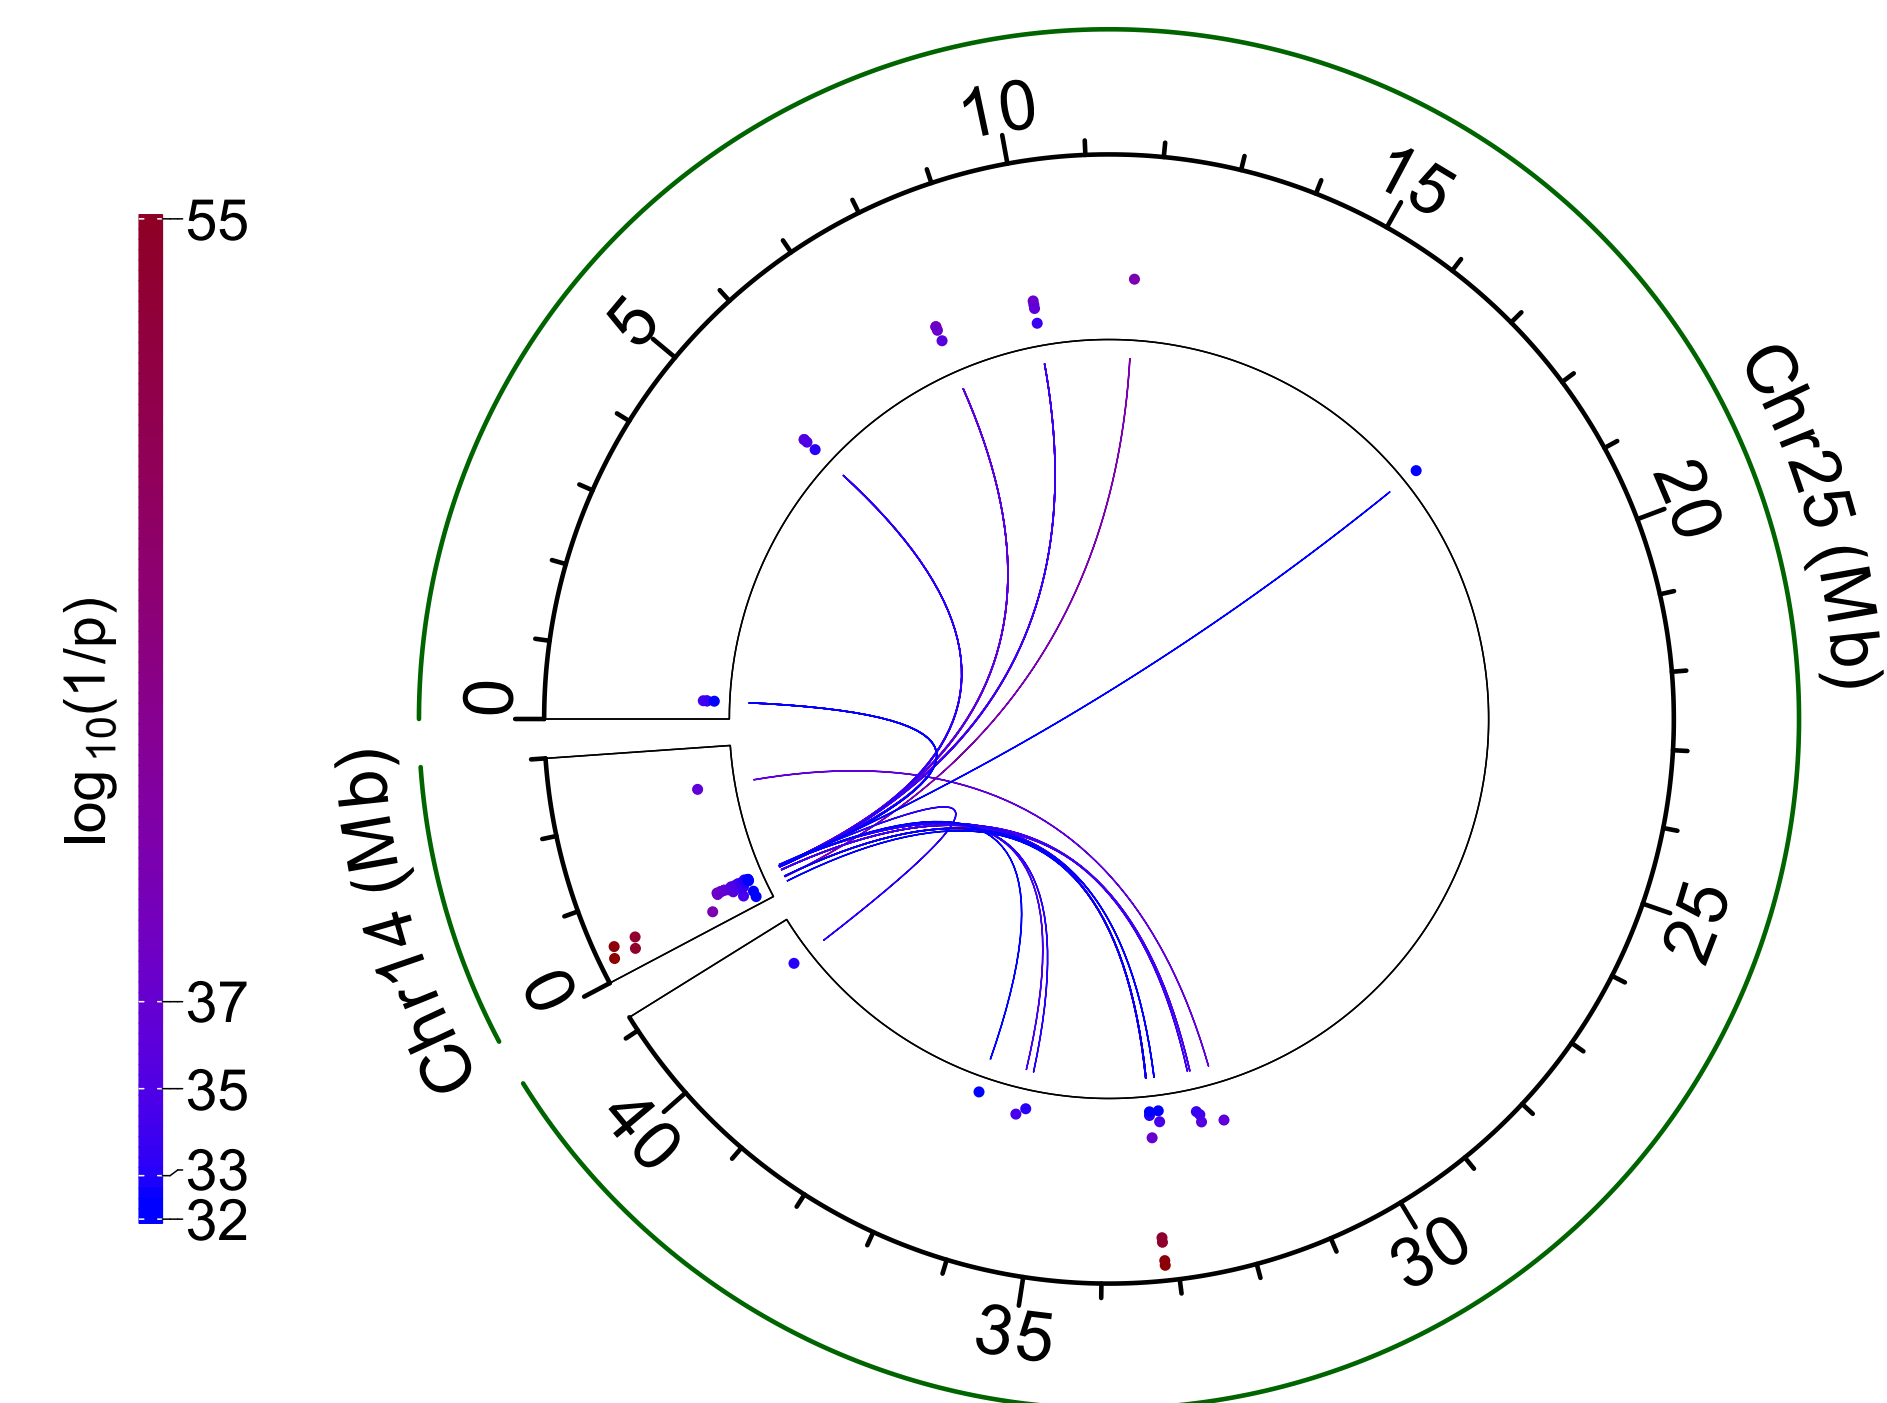

× AxA effect

× AxA effect

× AxA effect

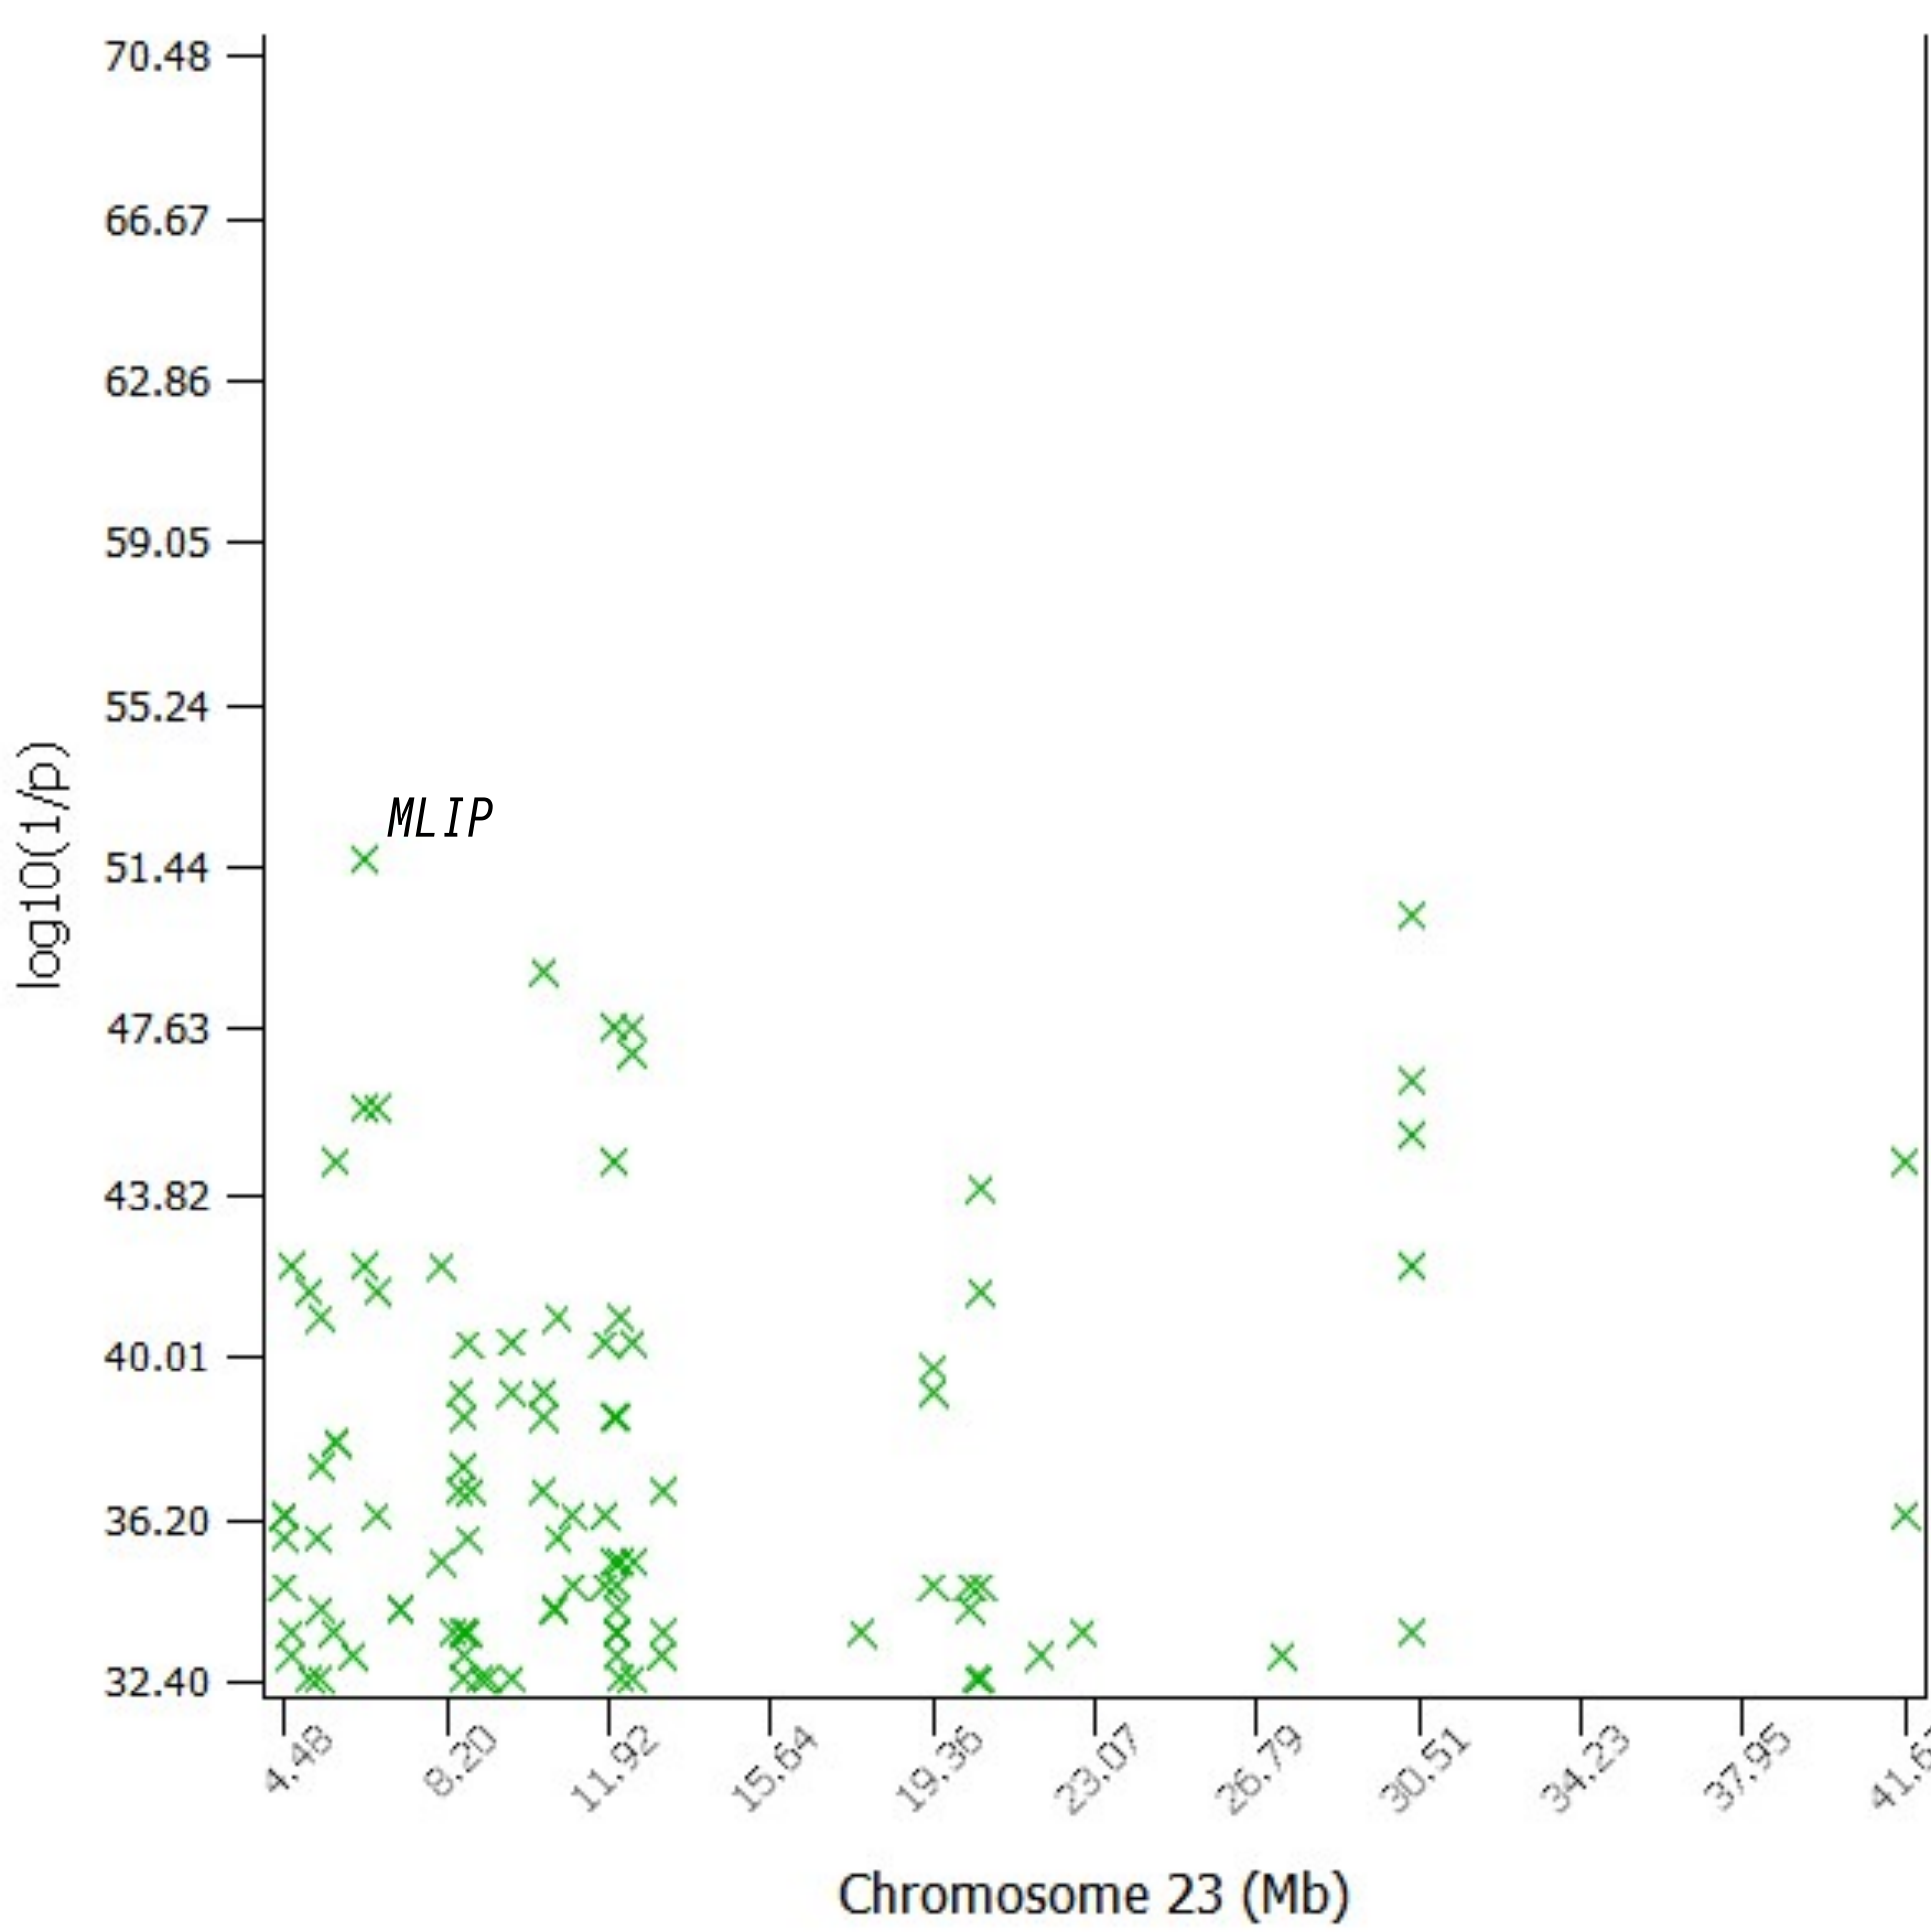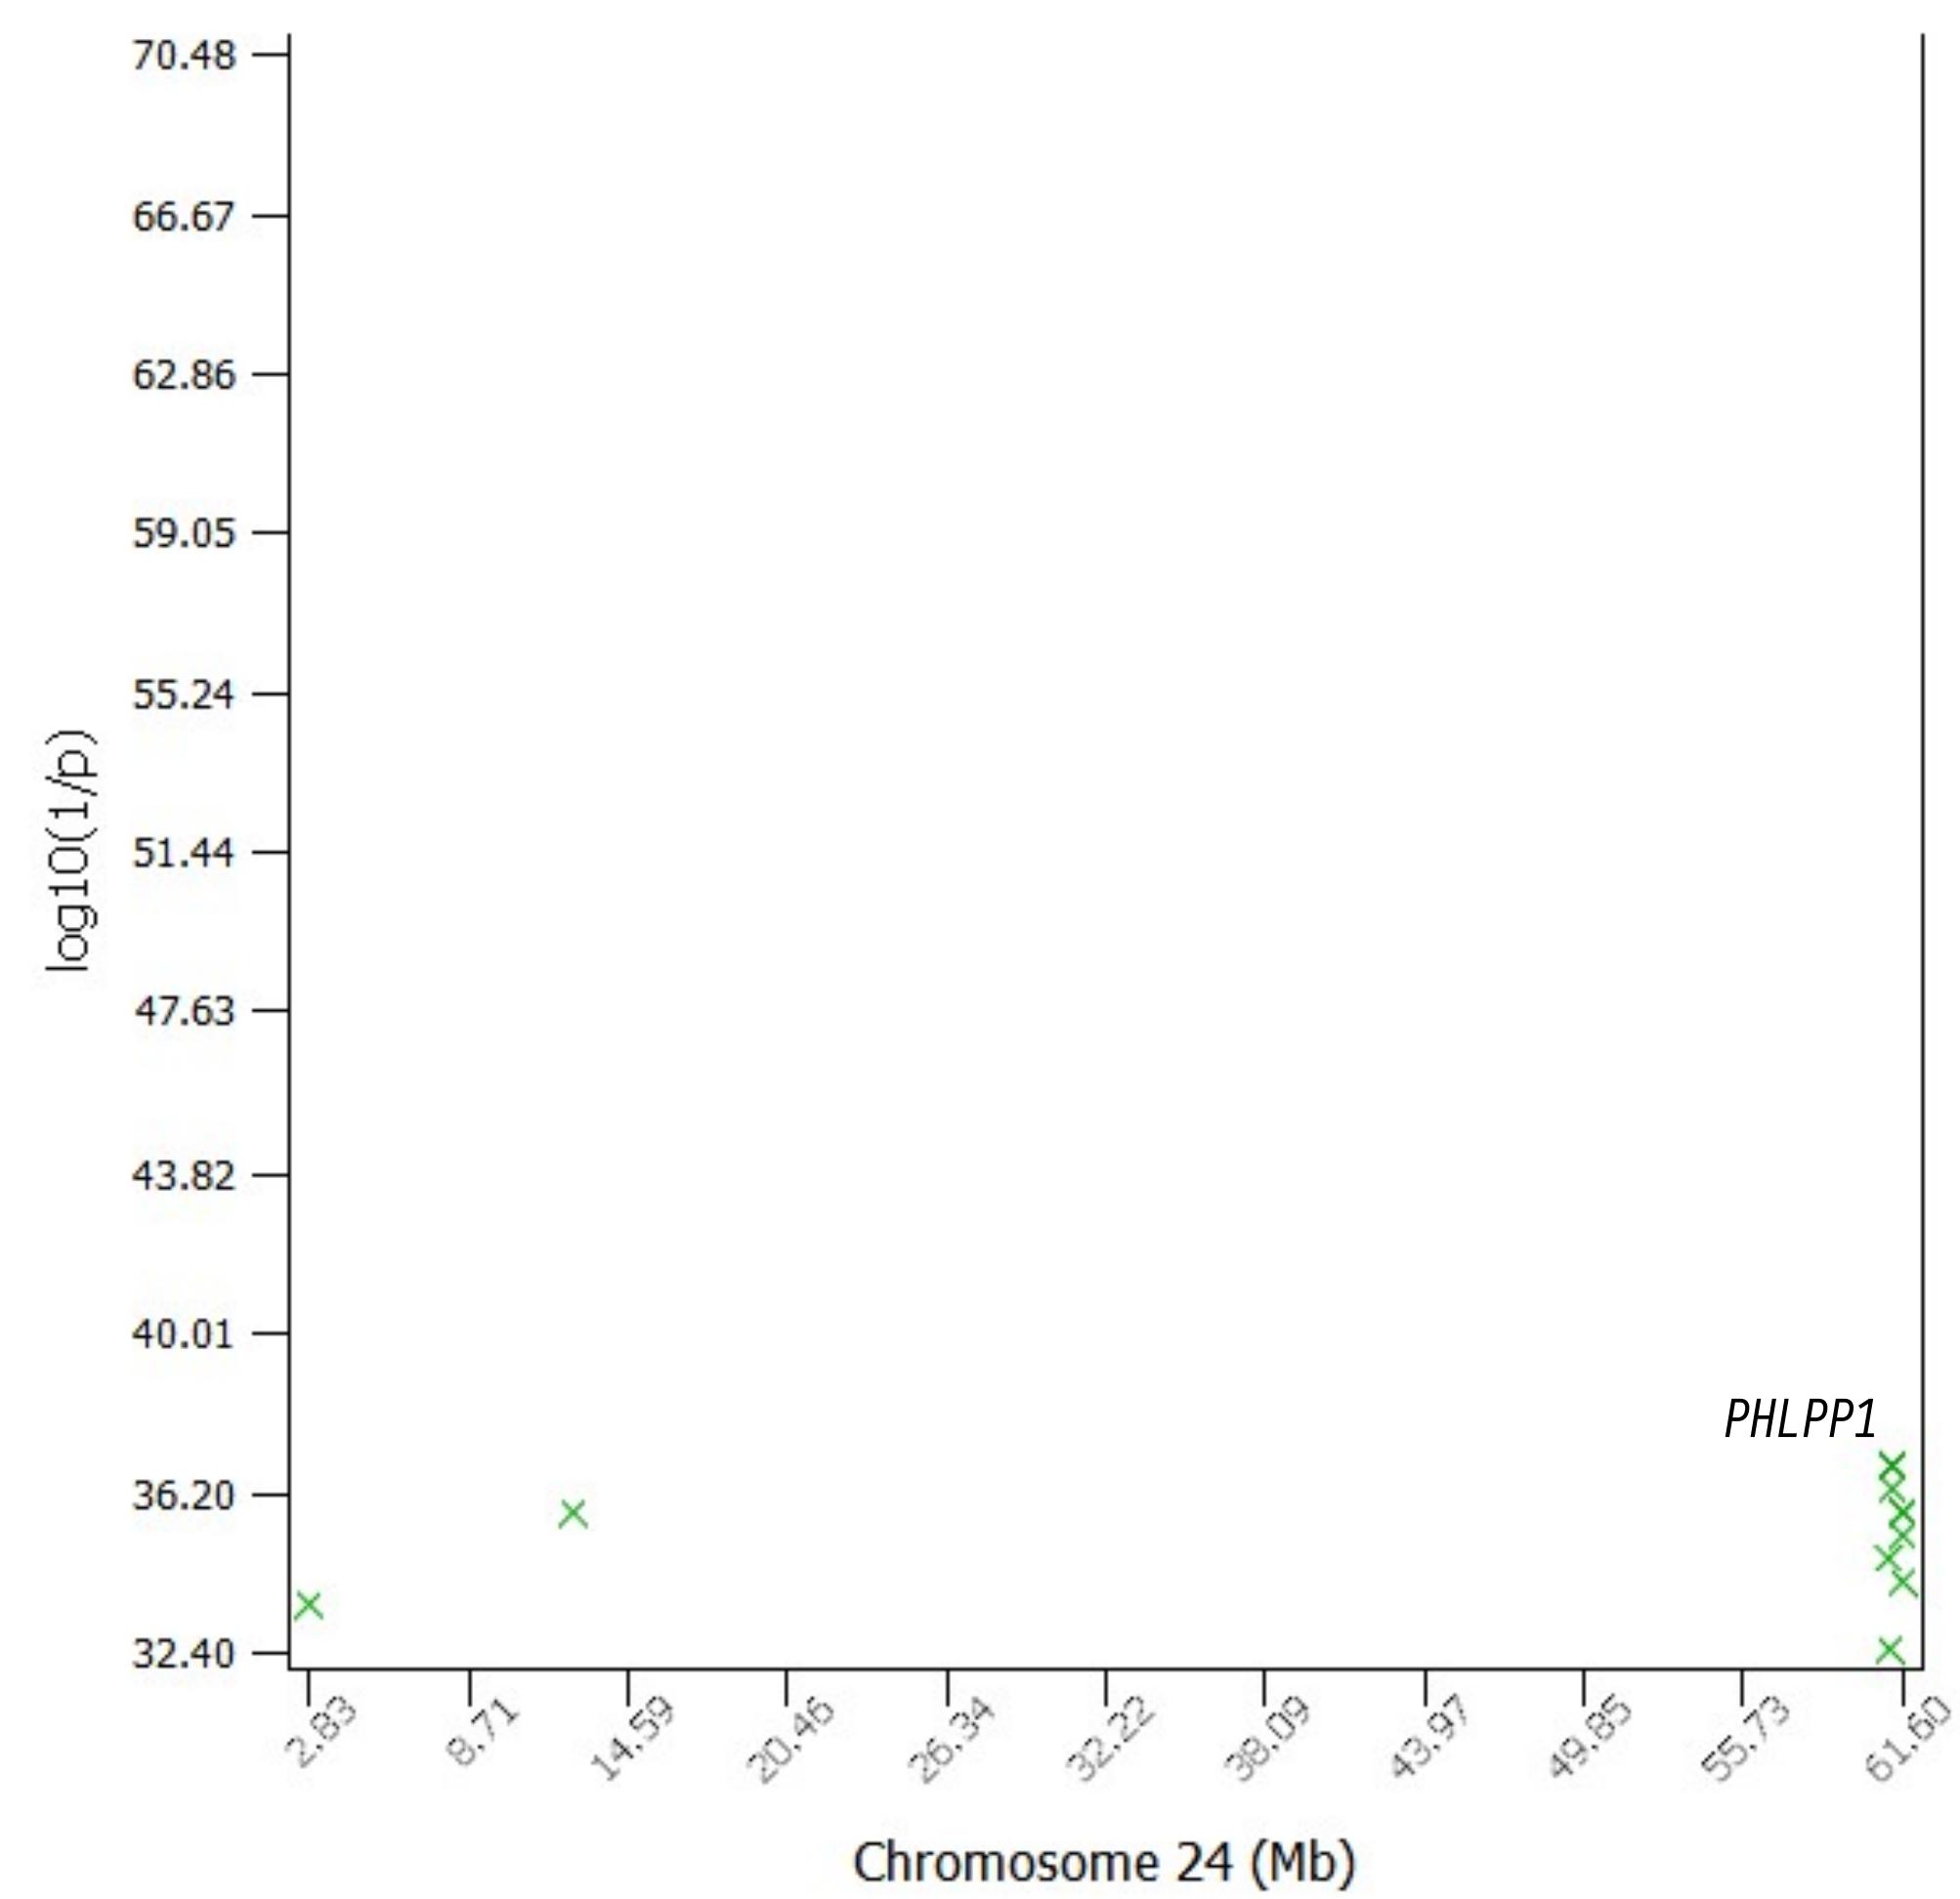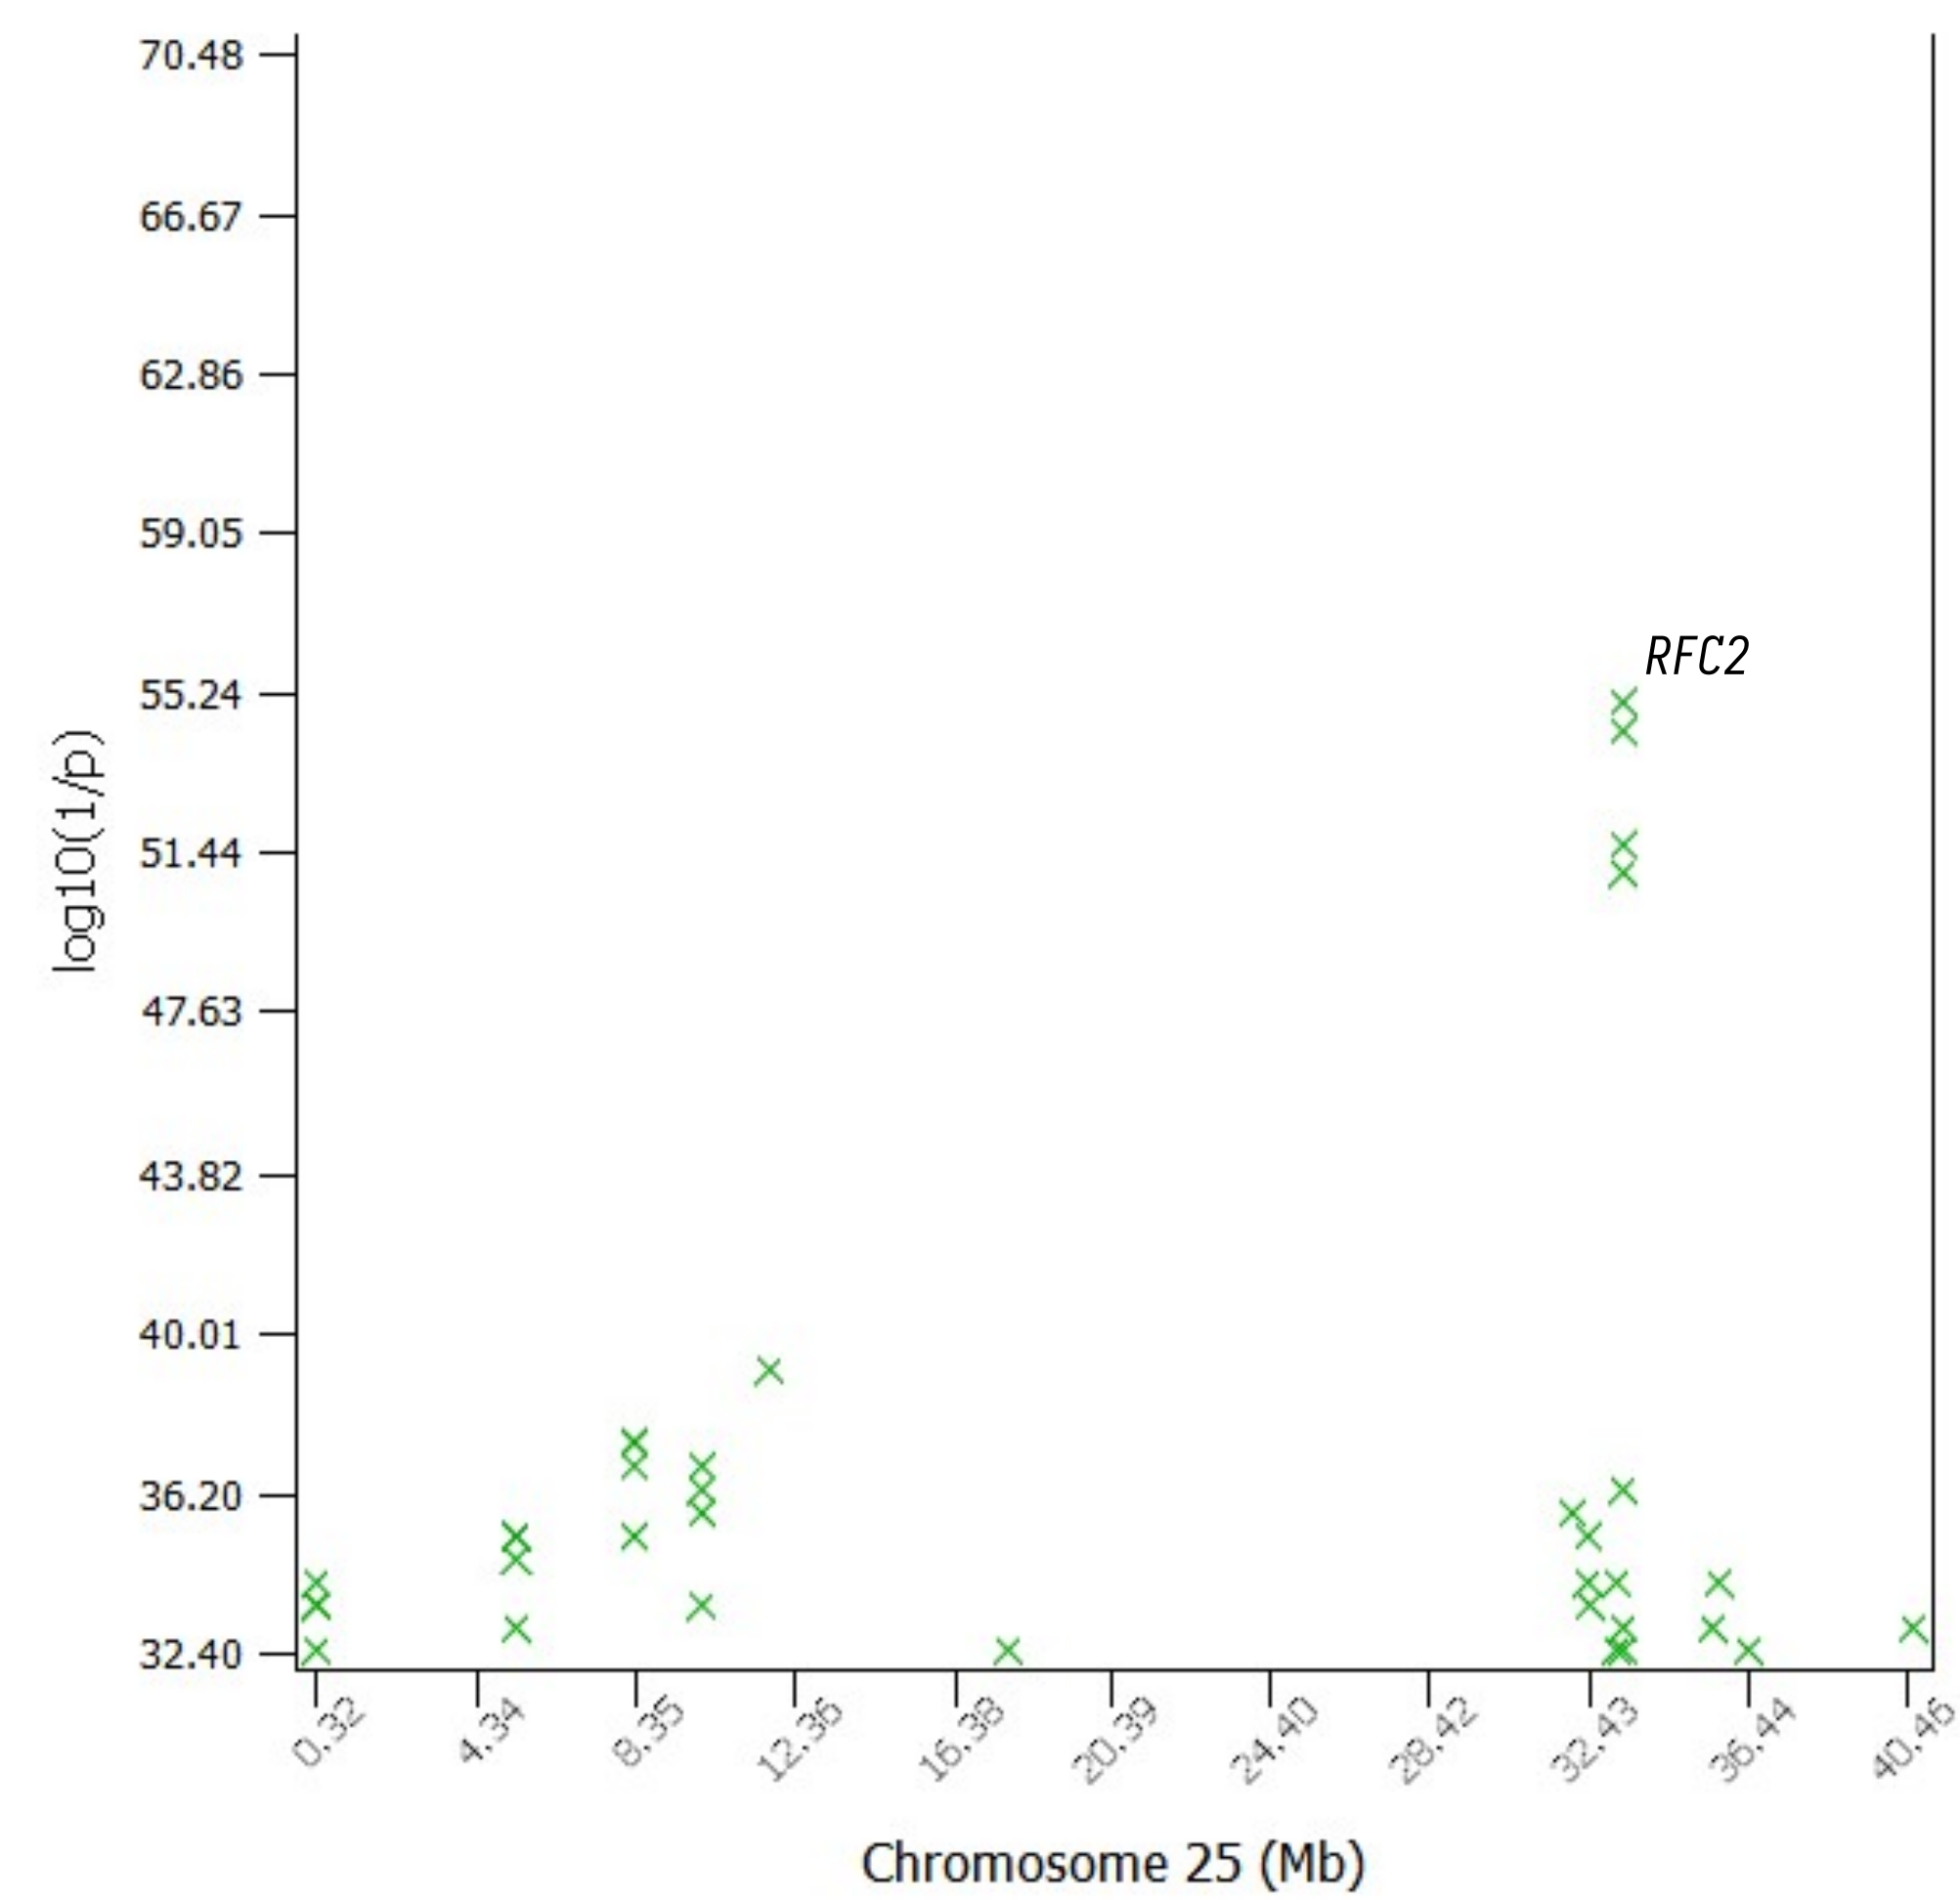



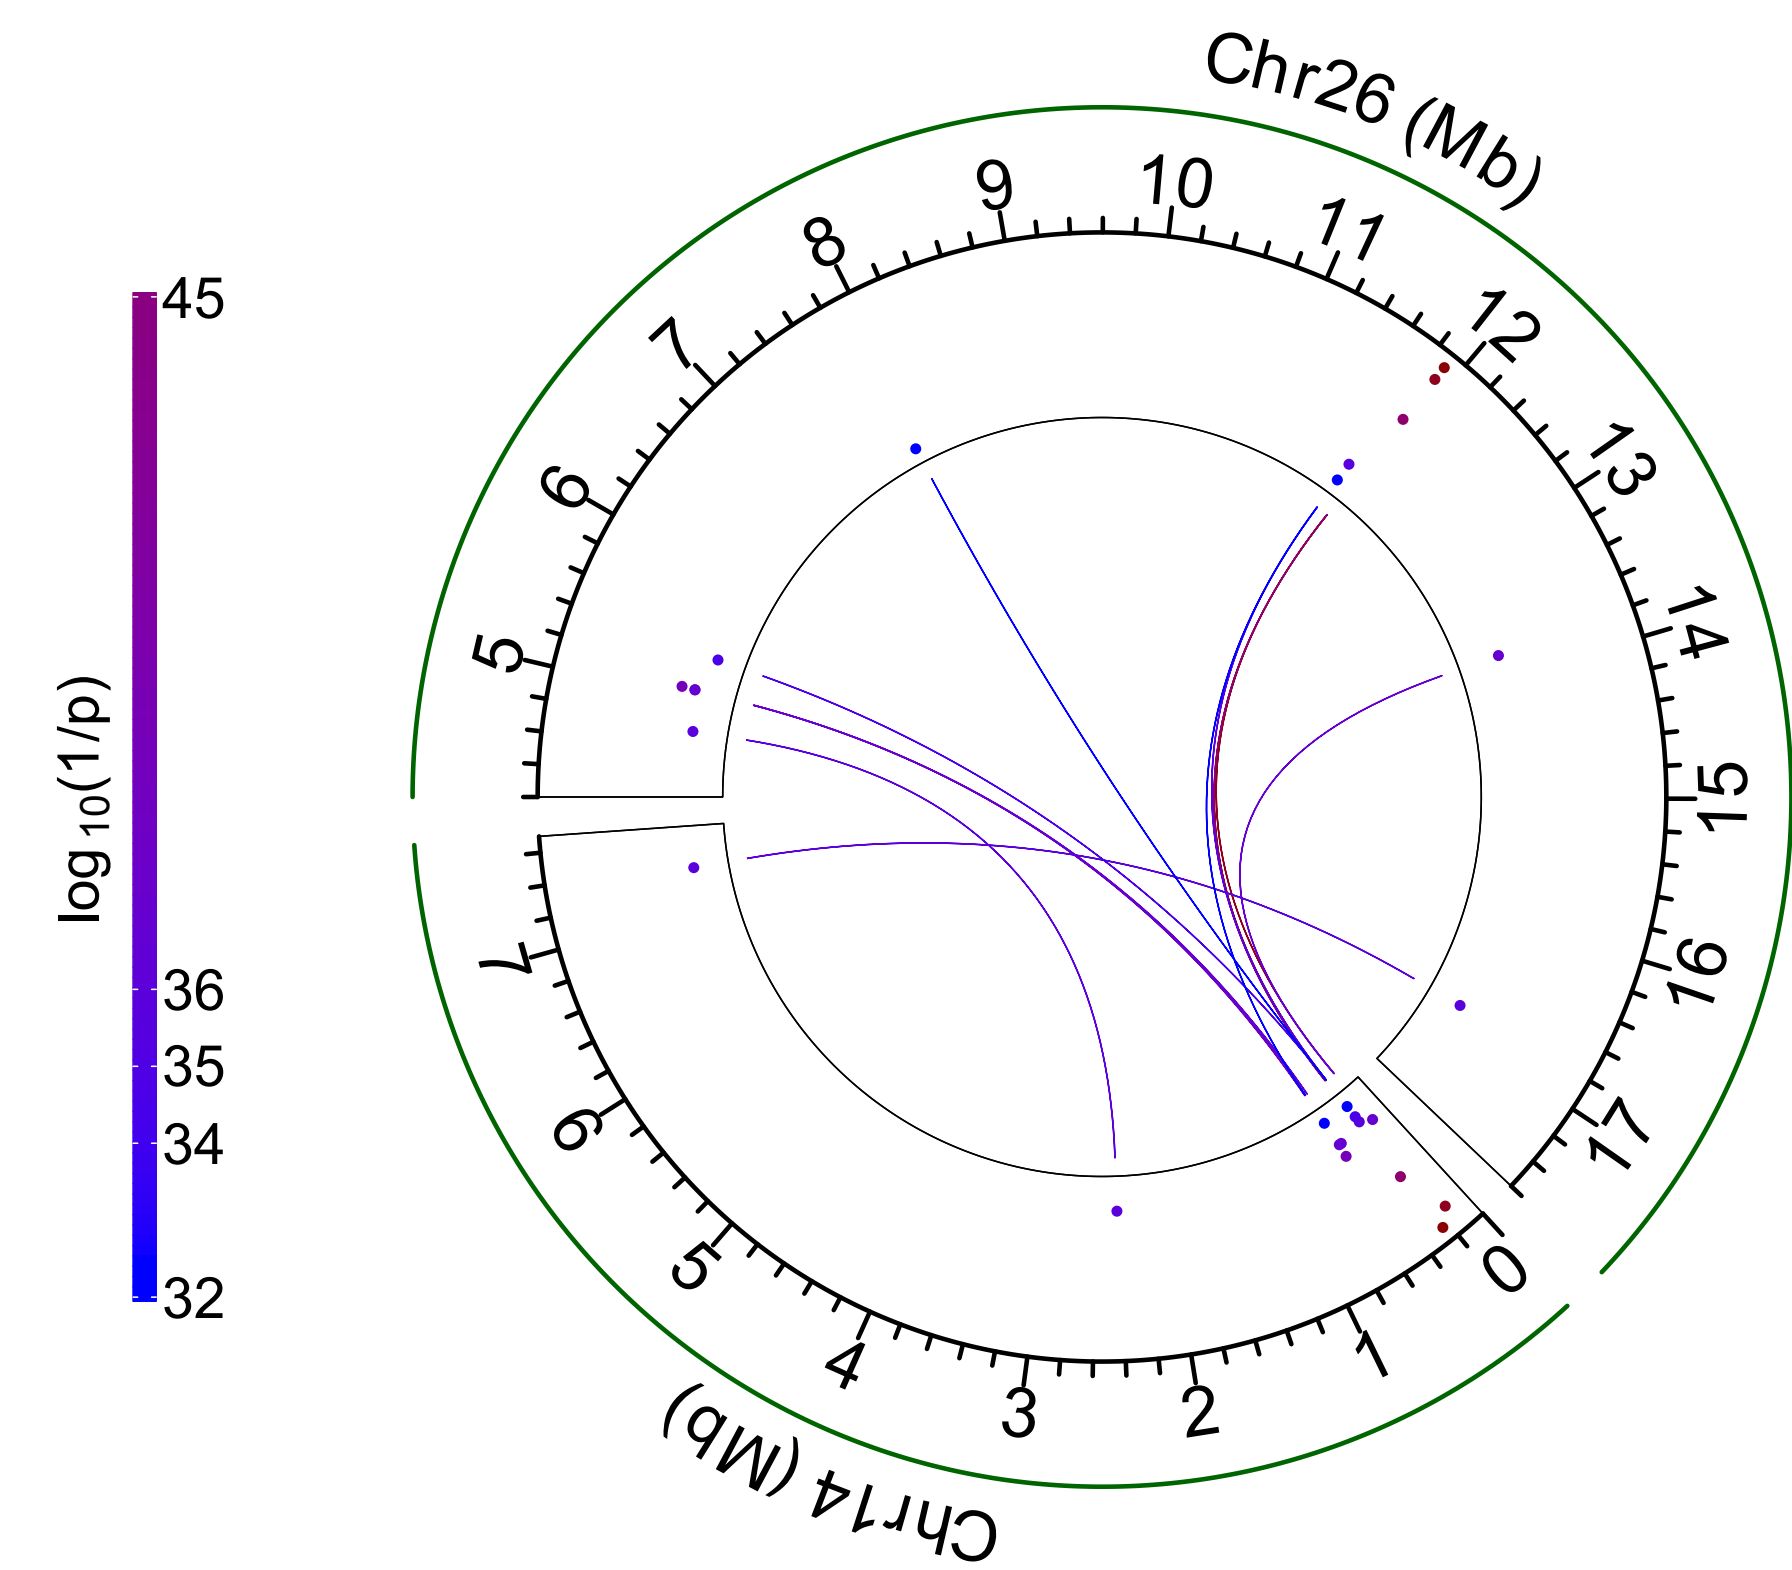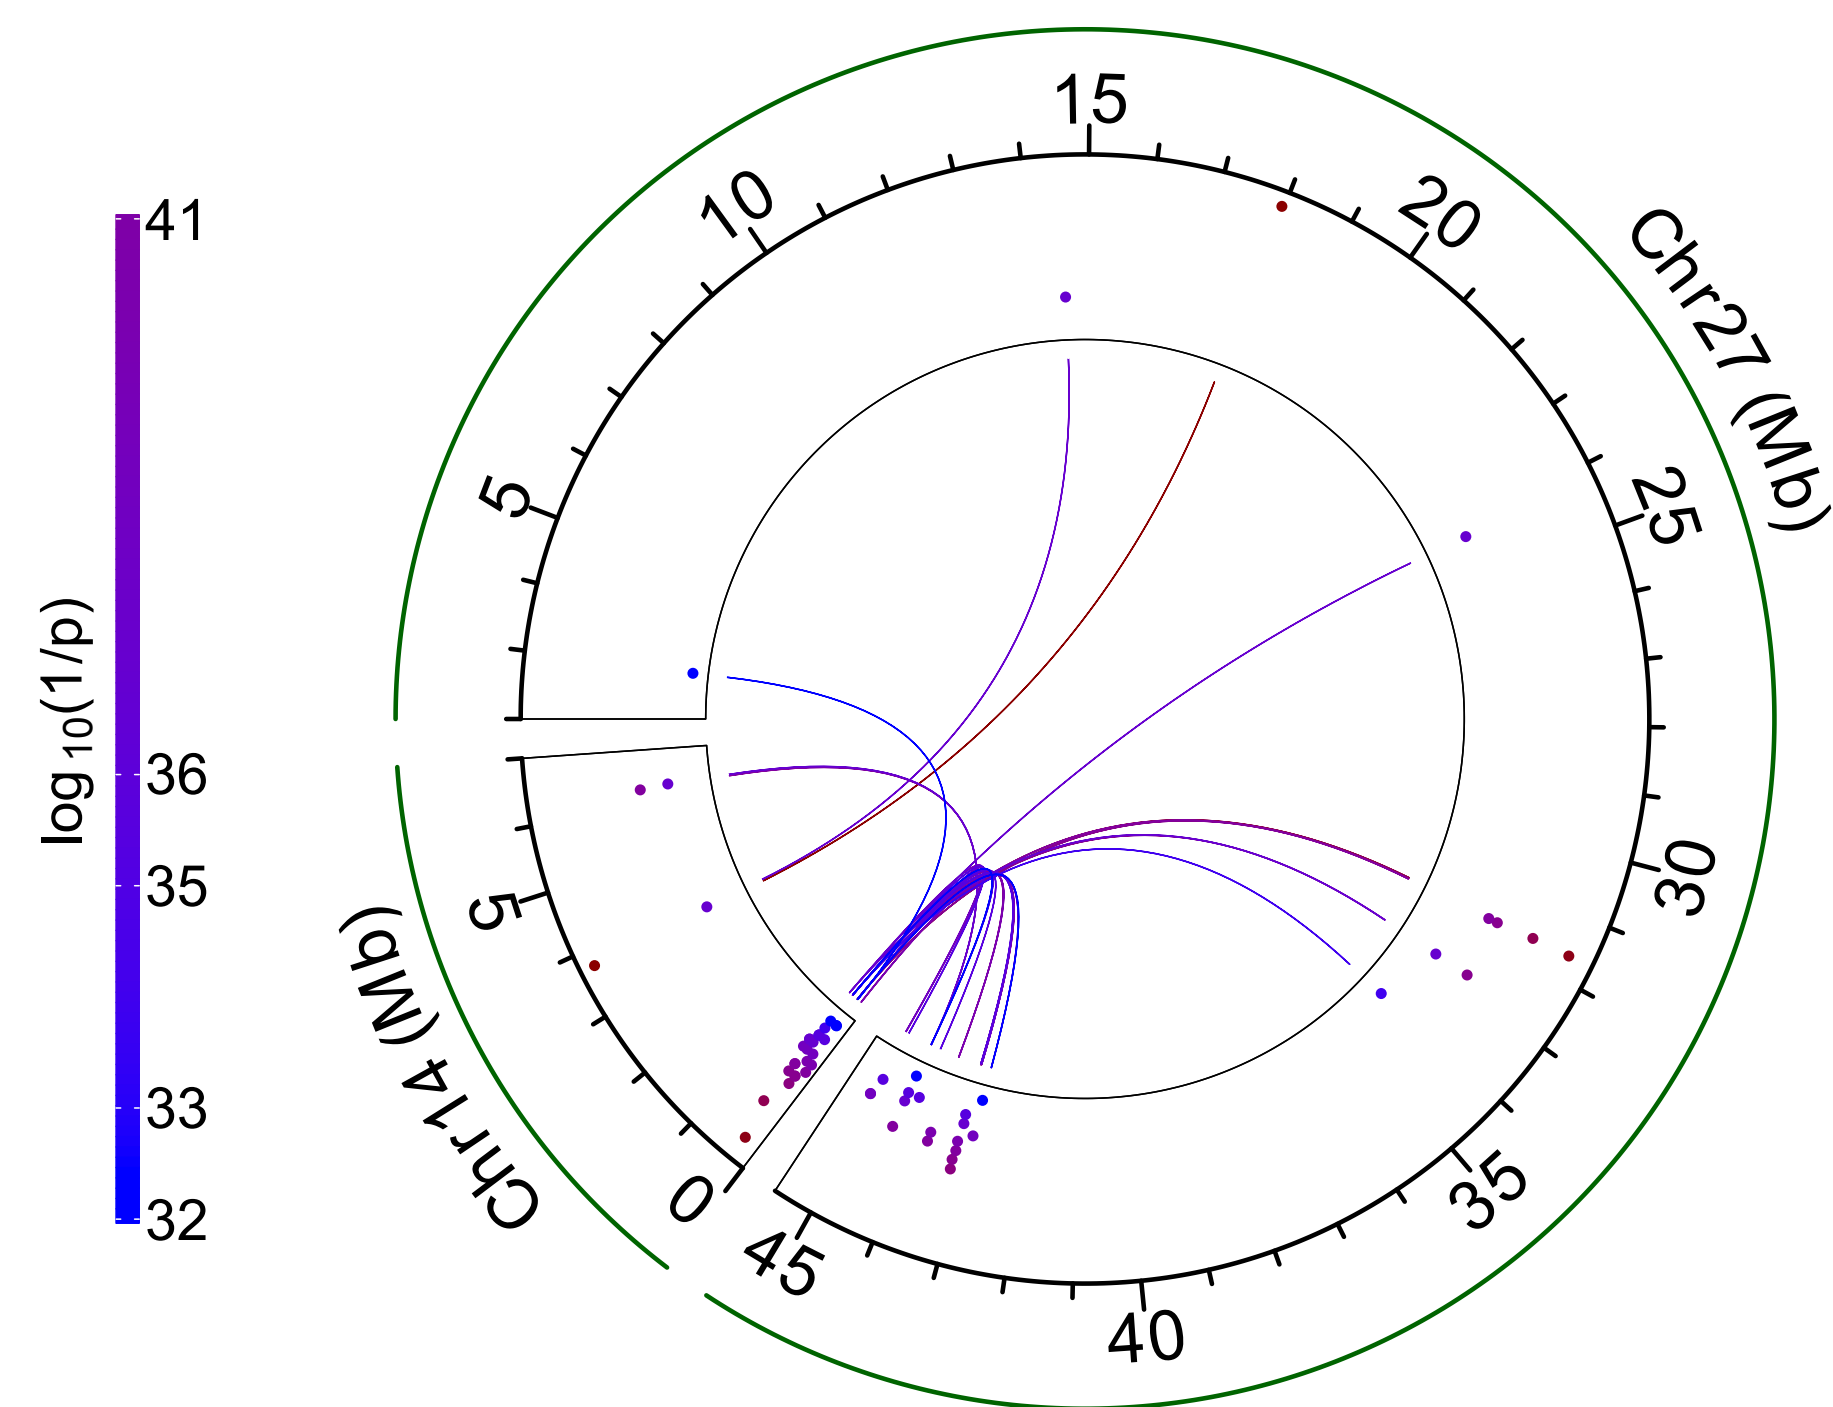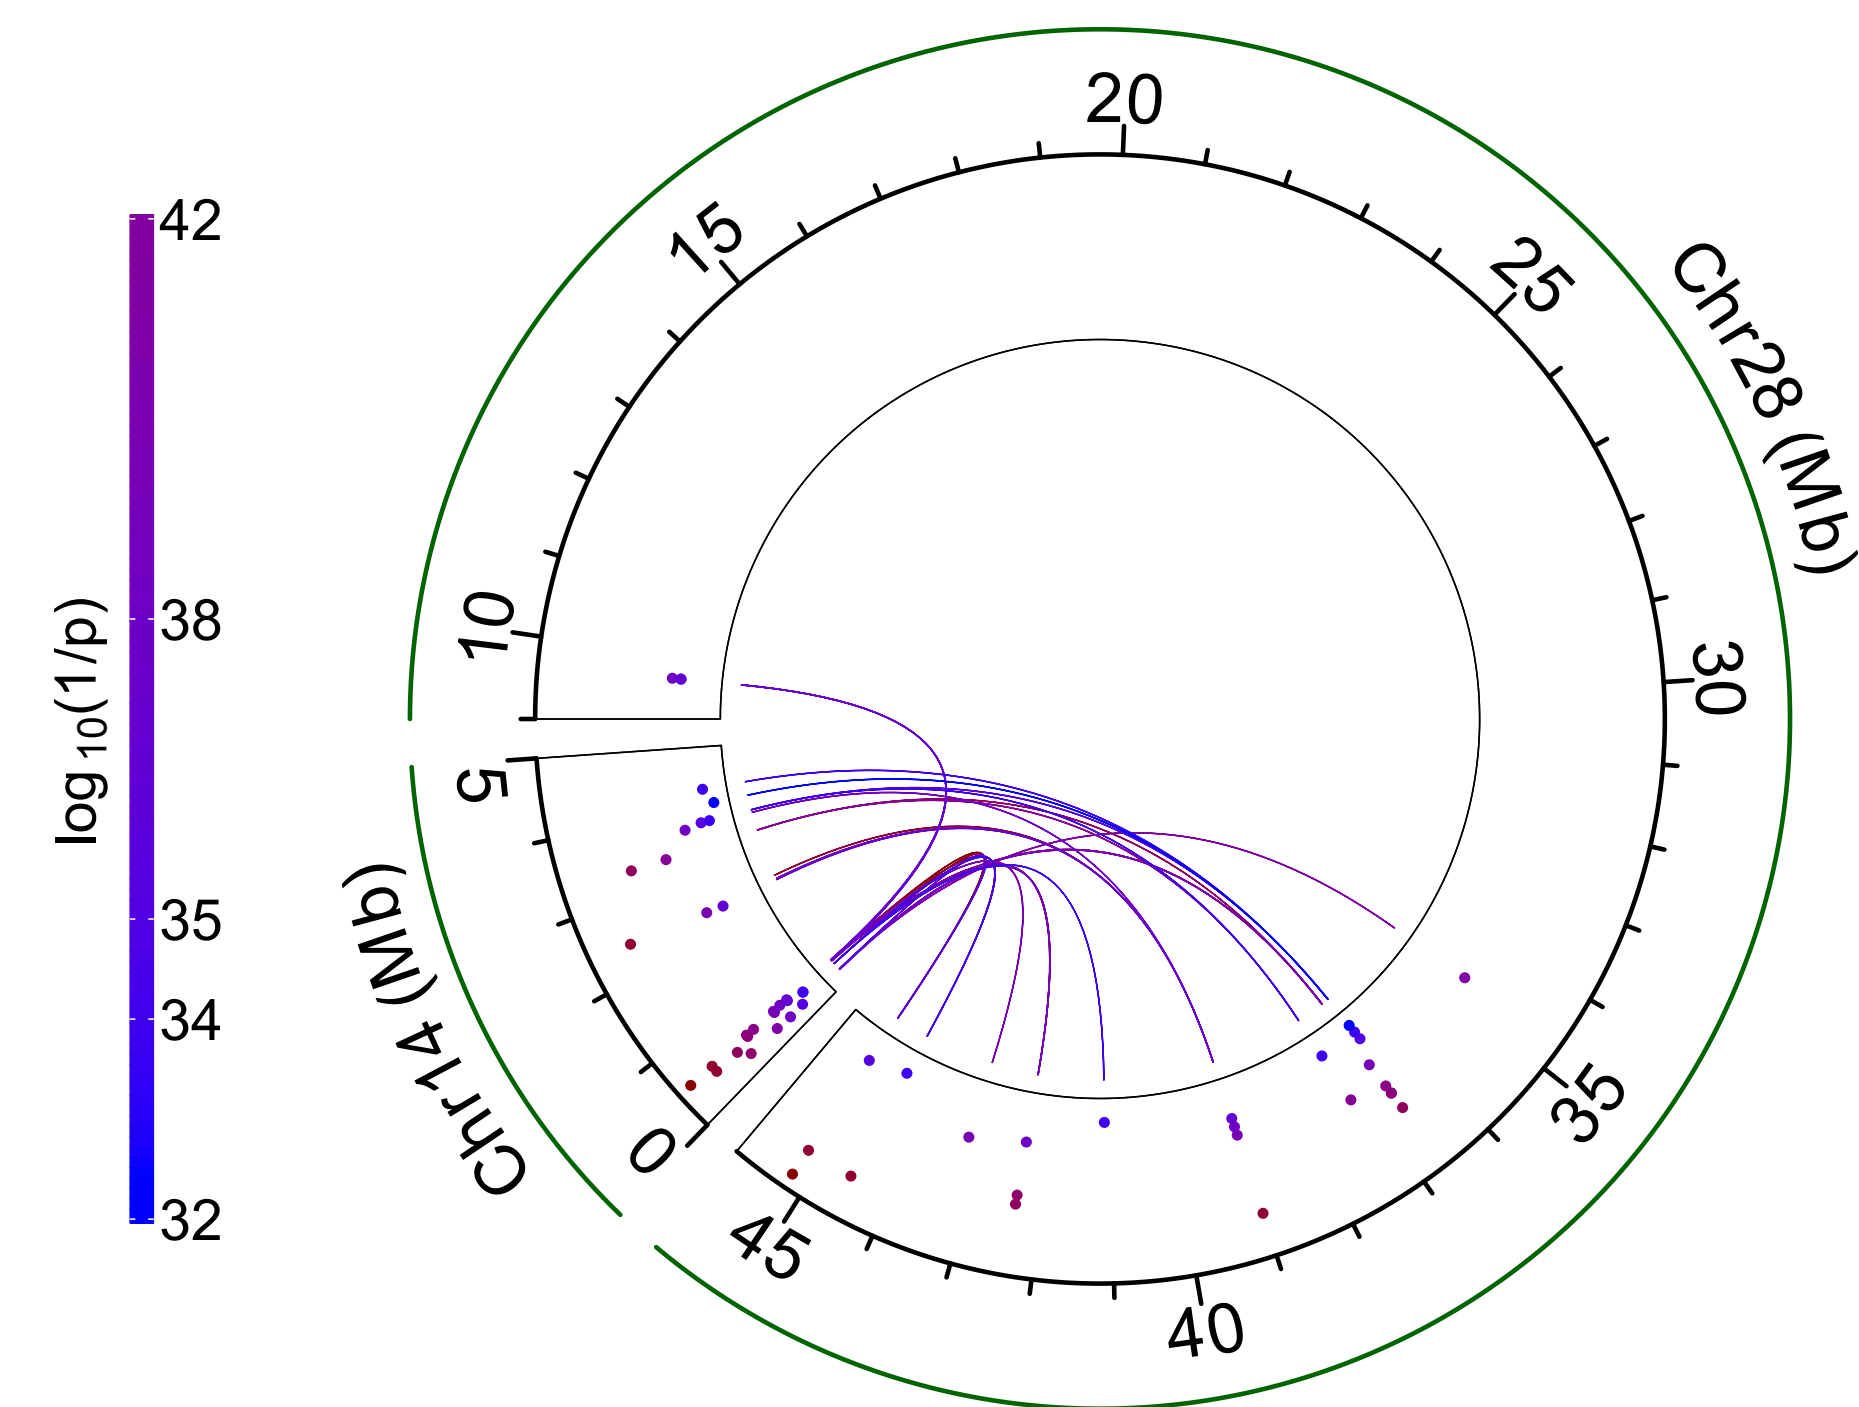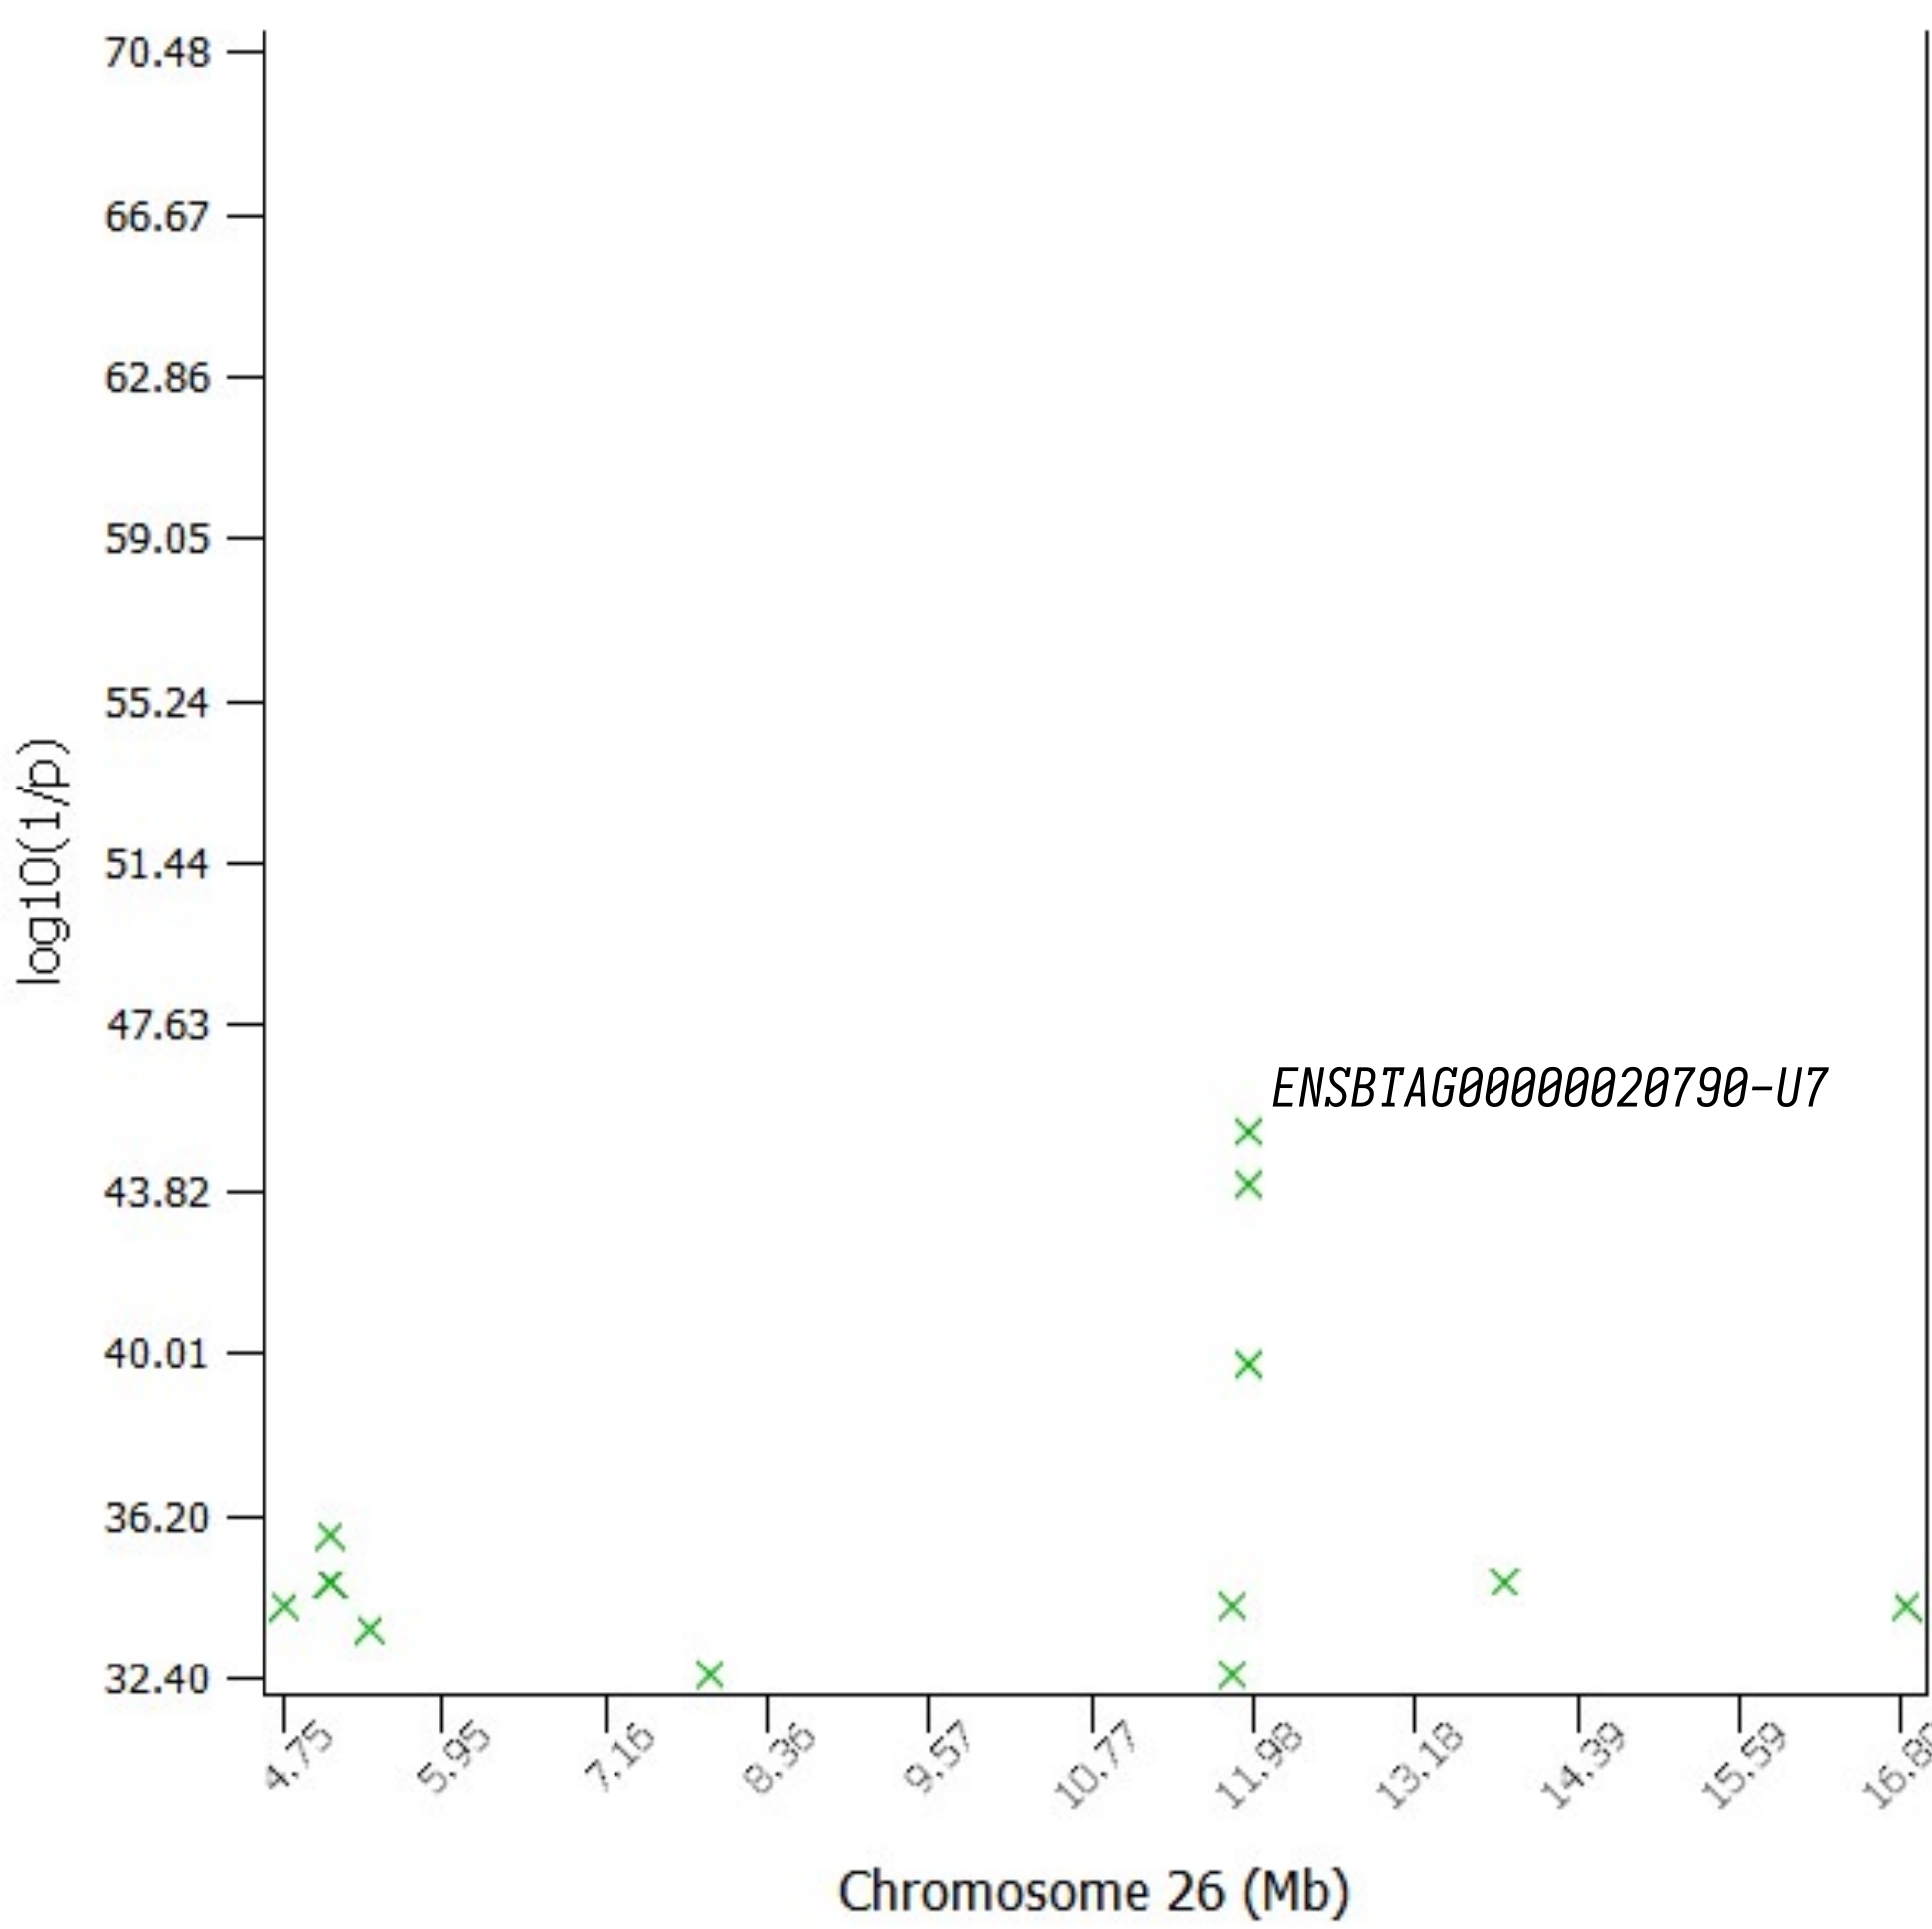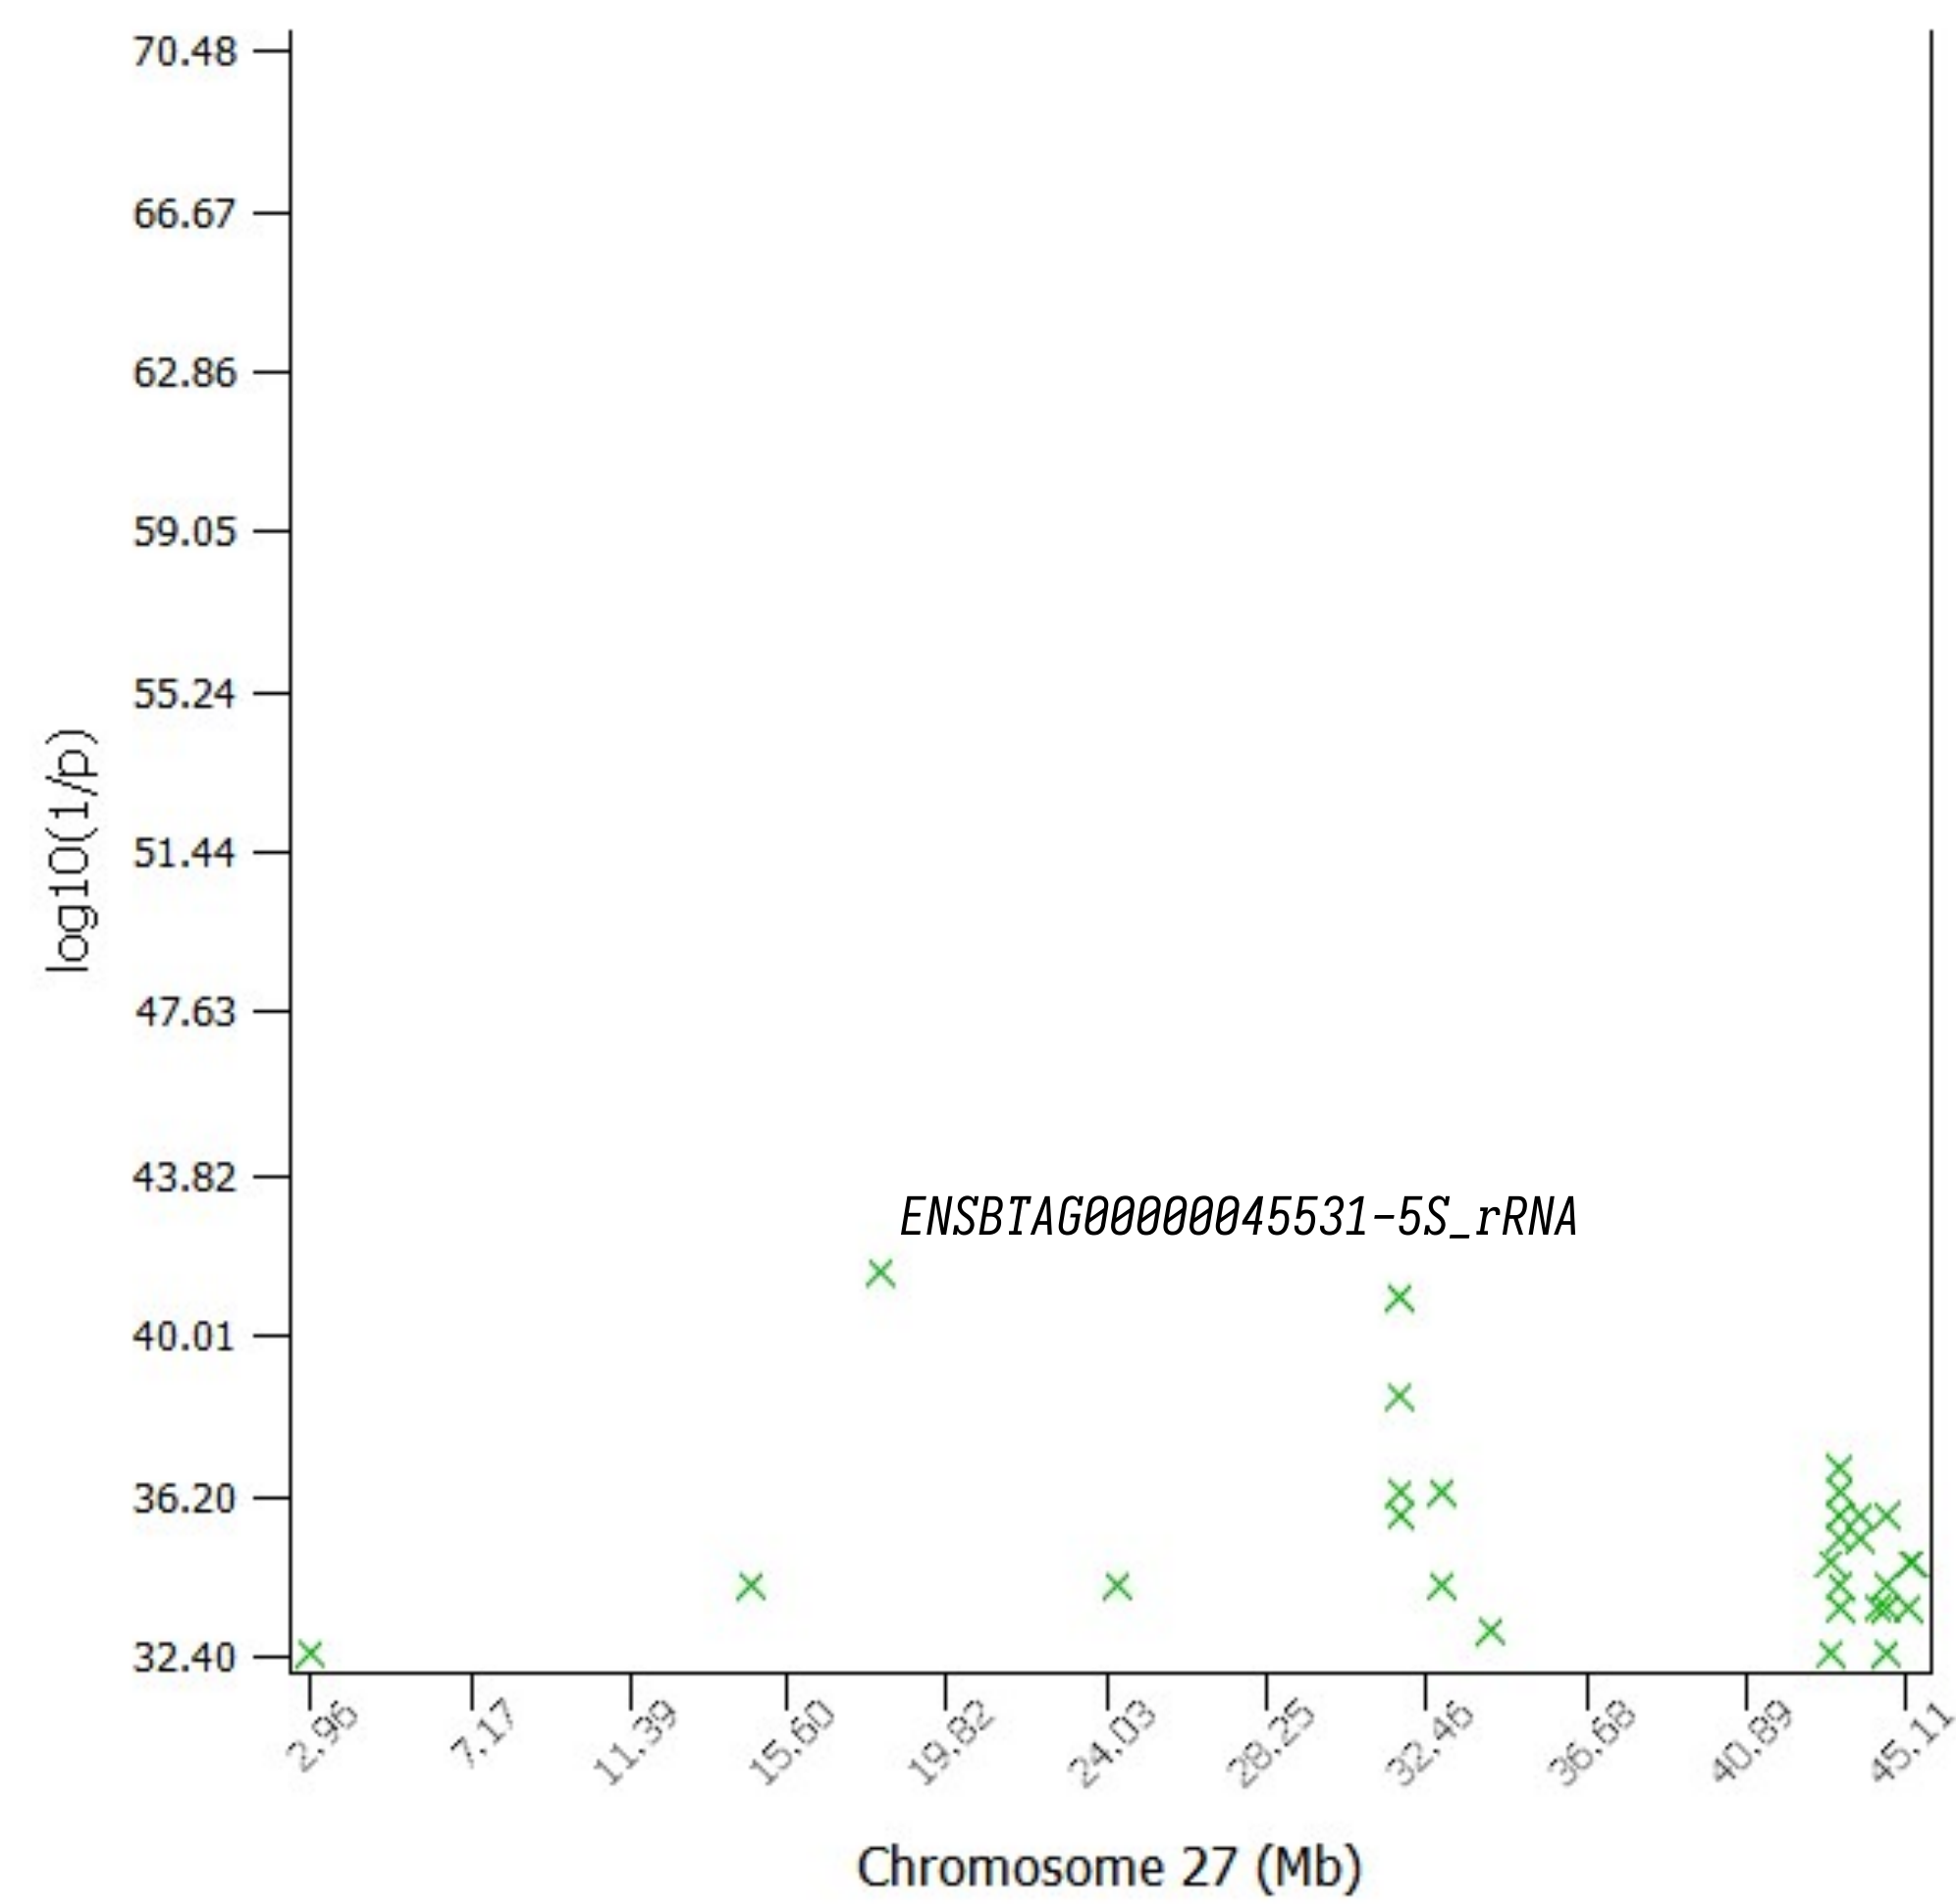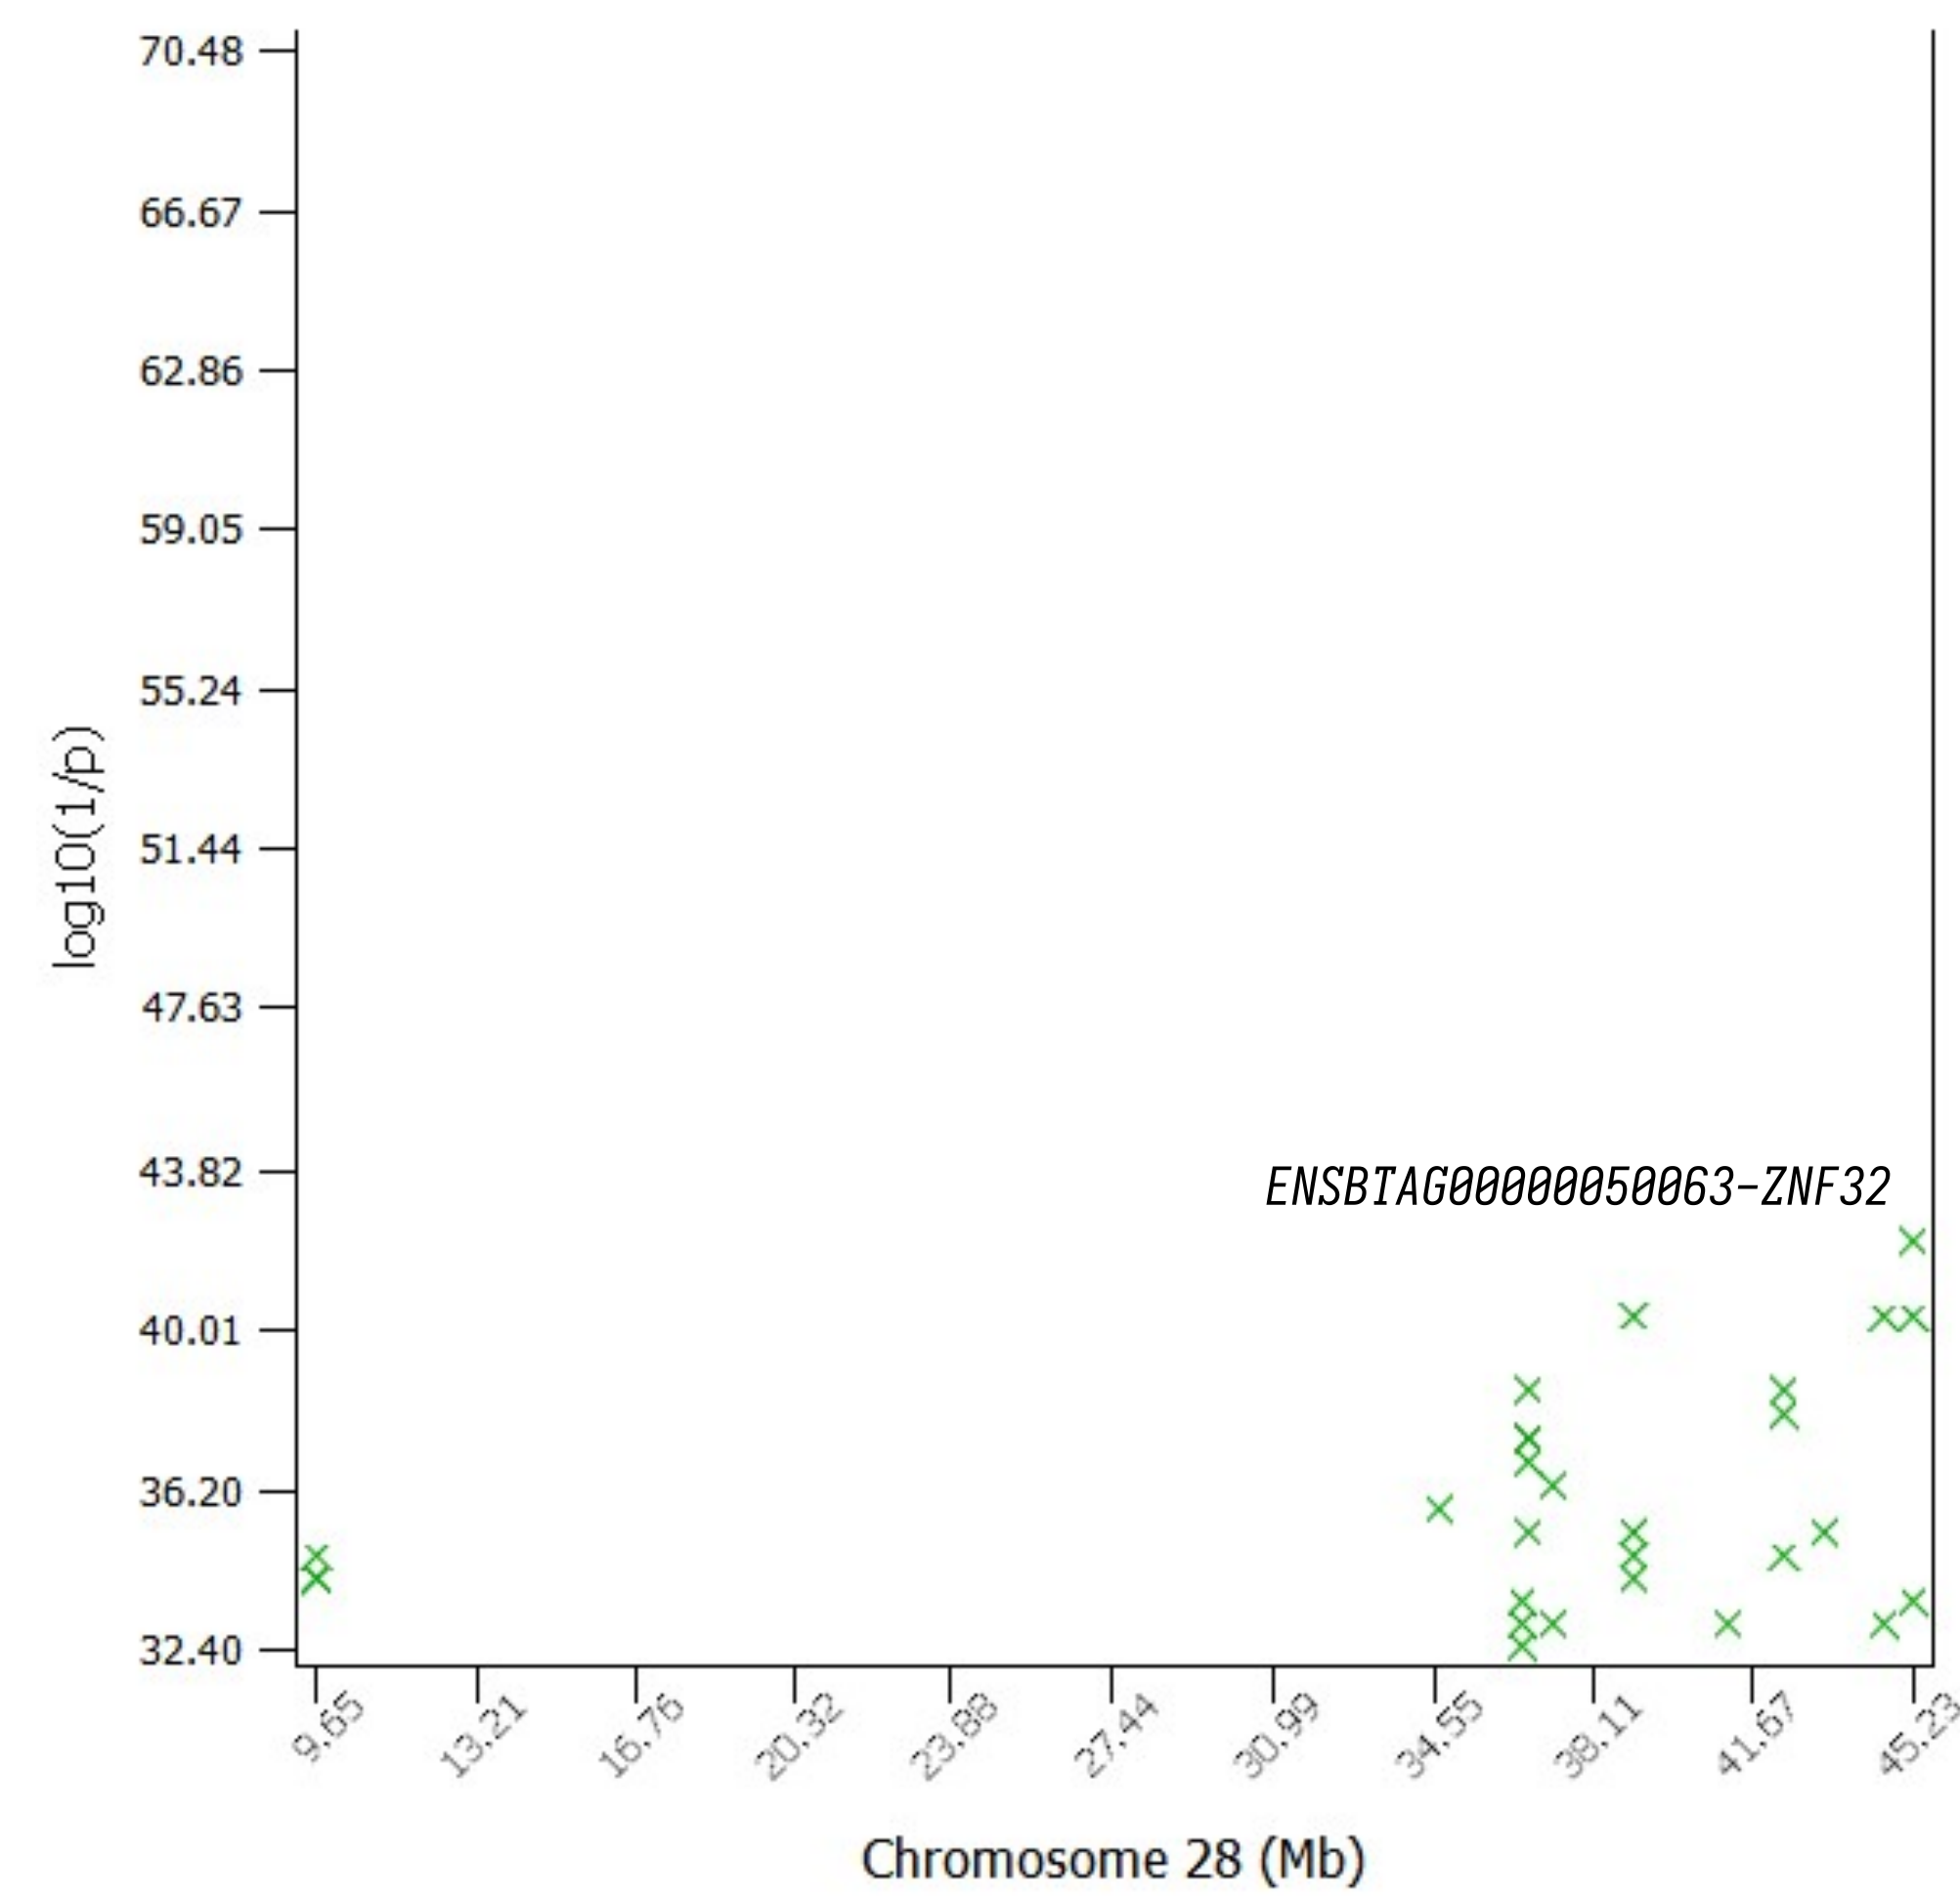



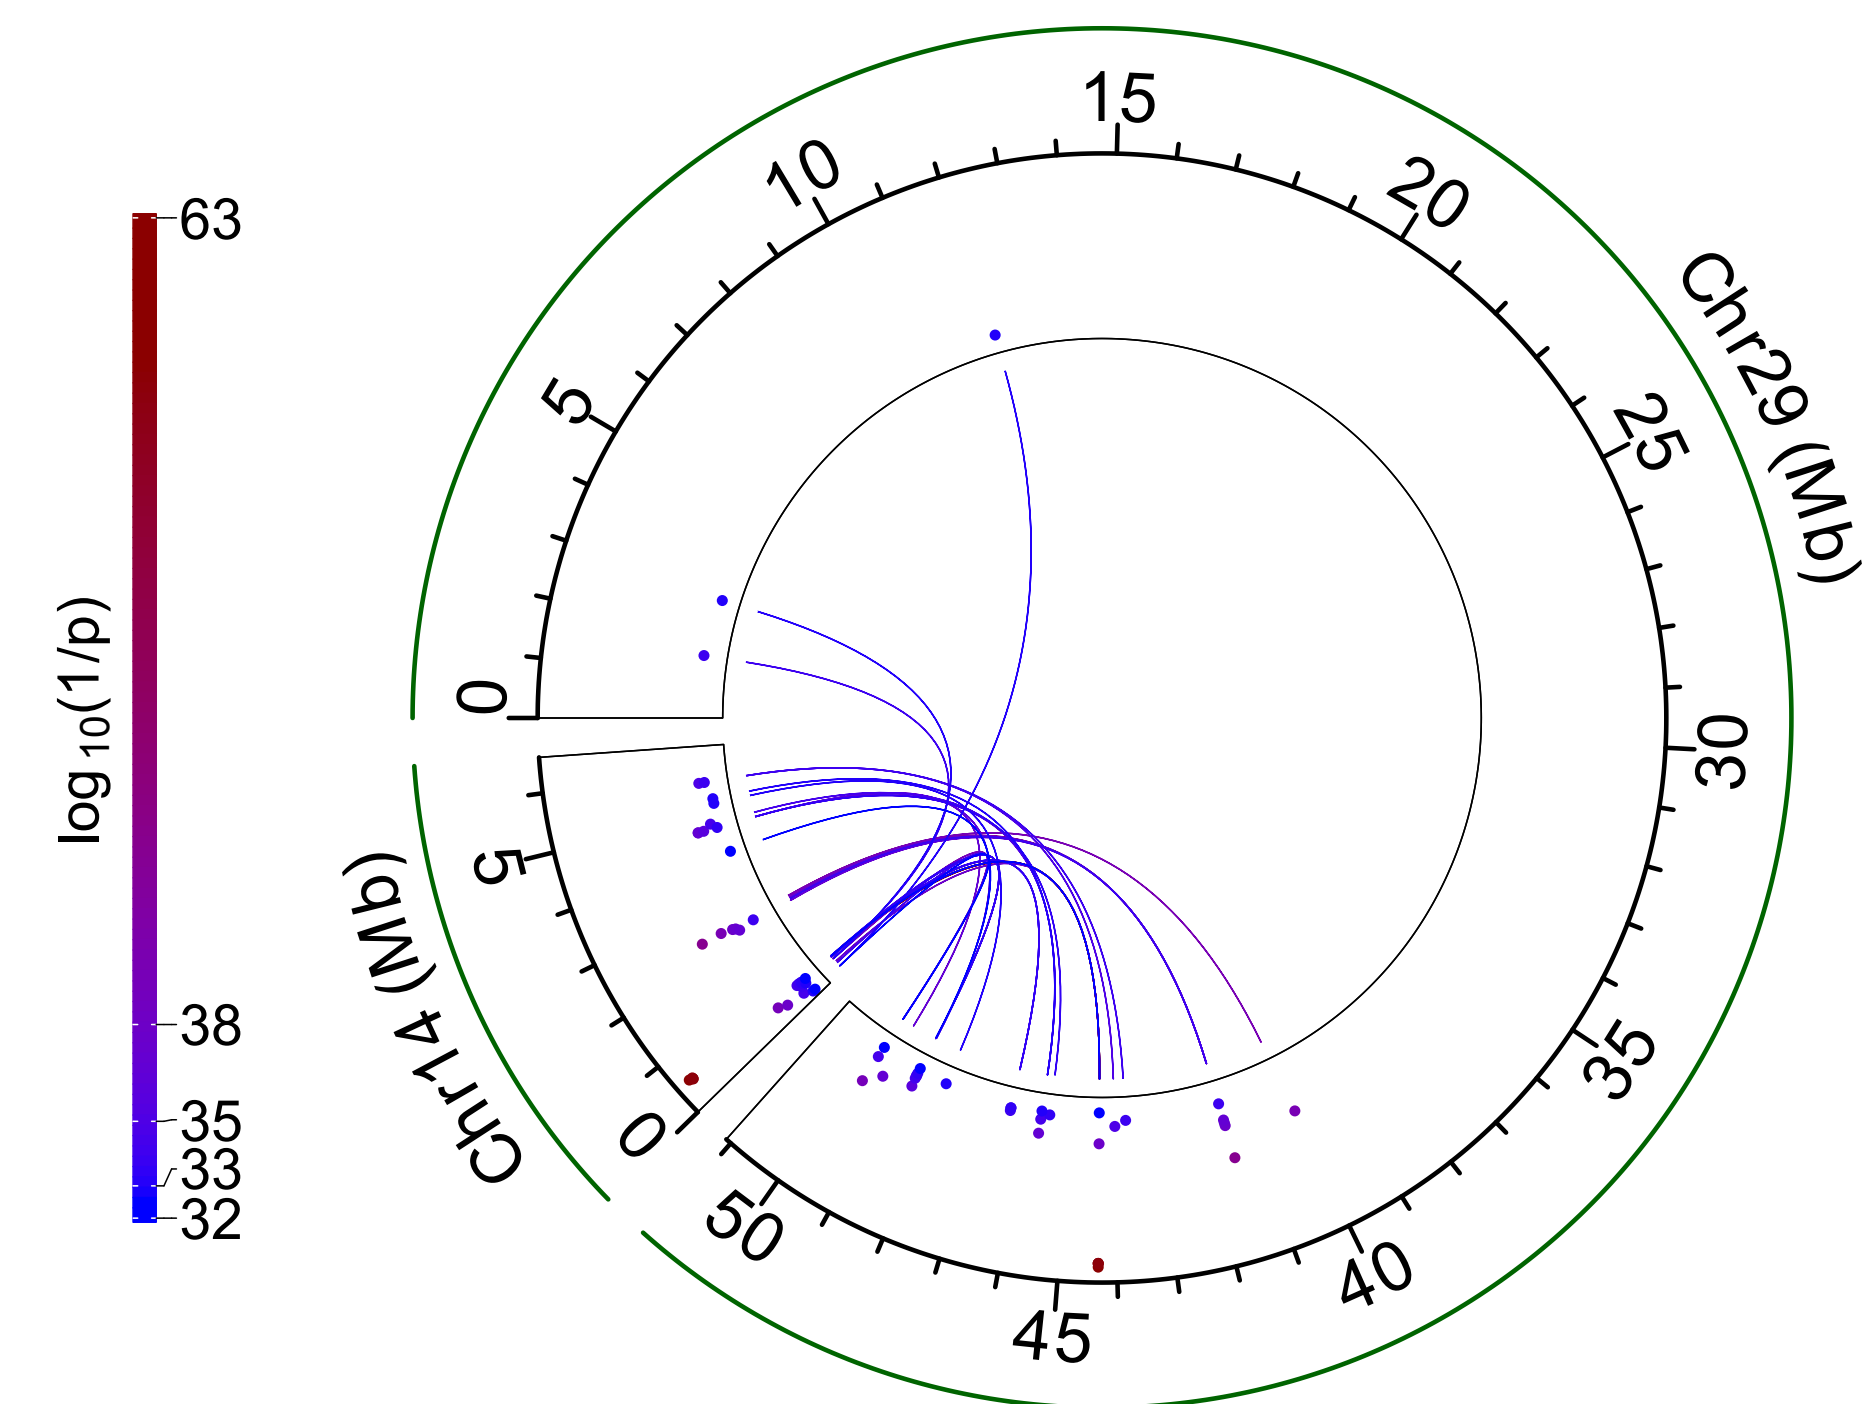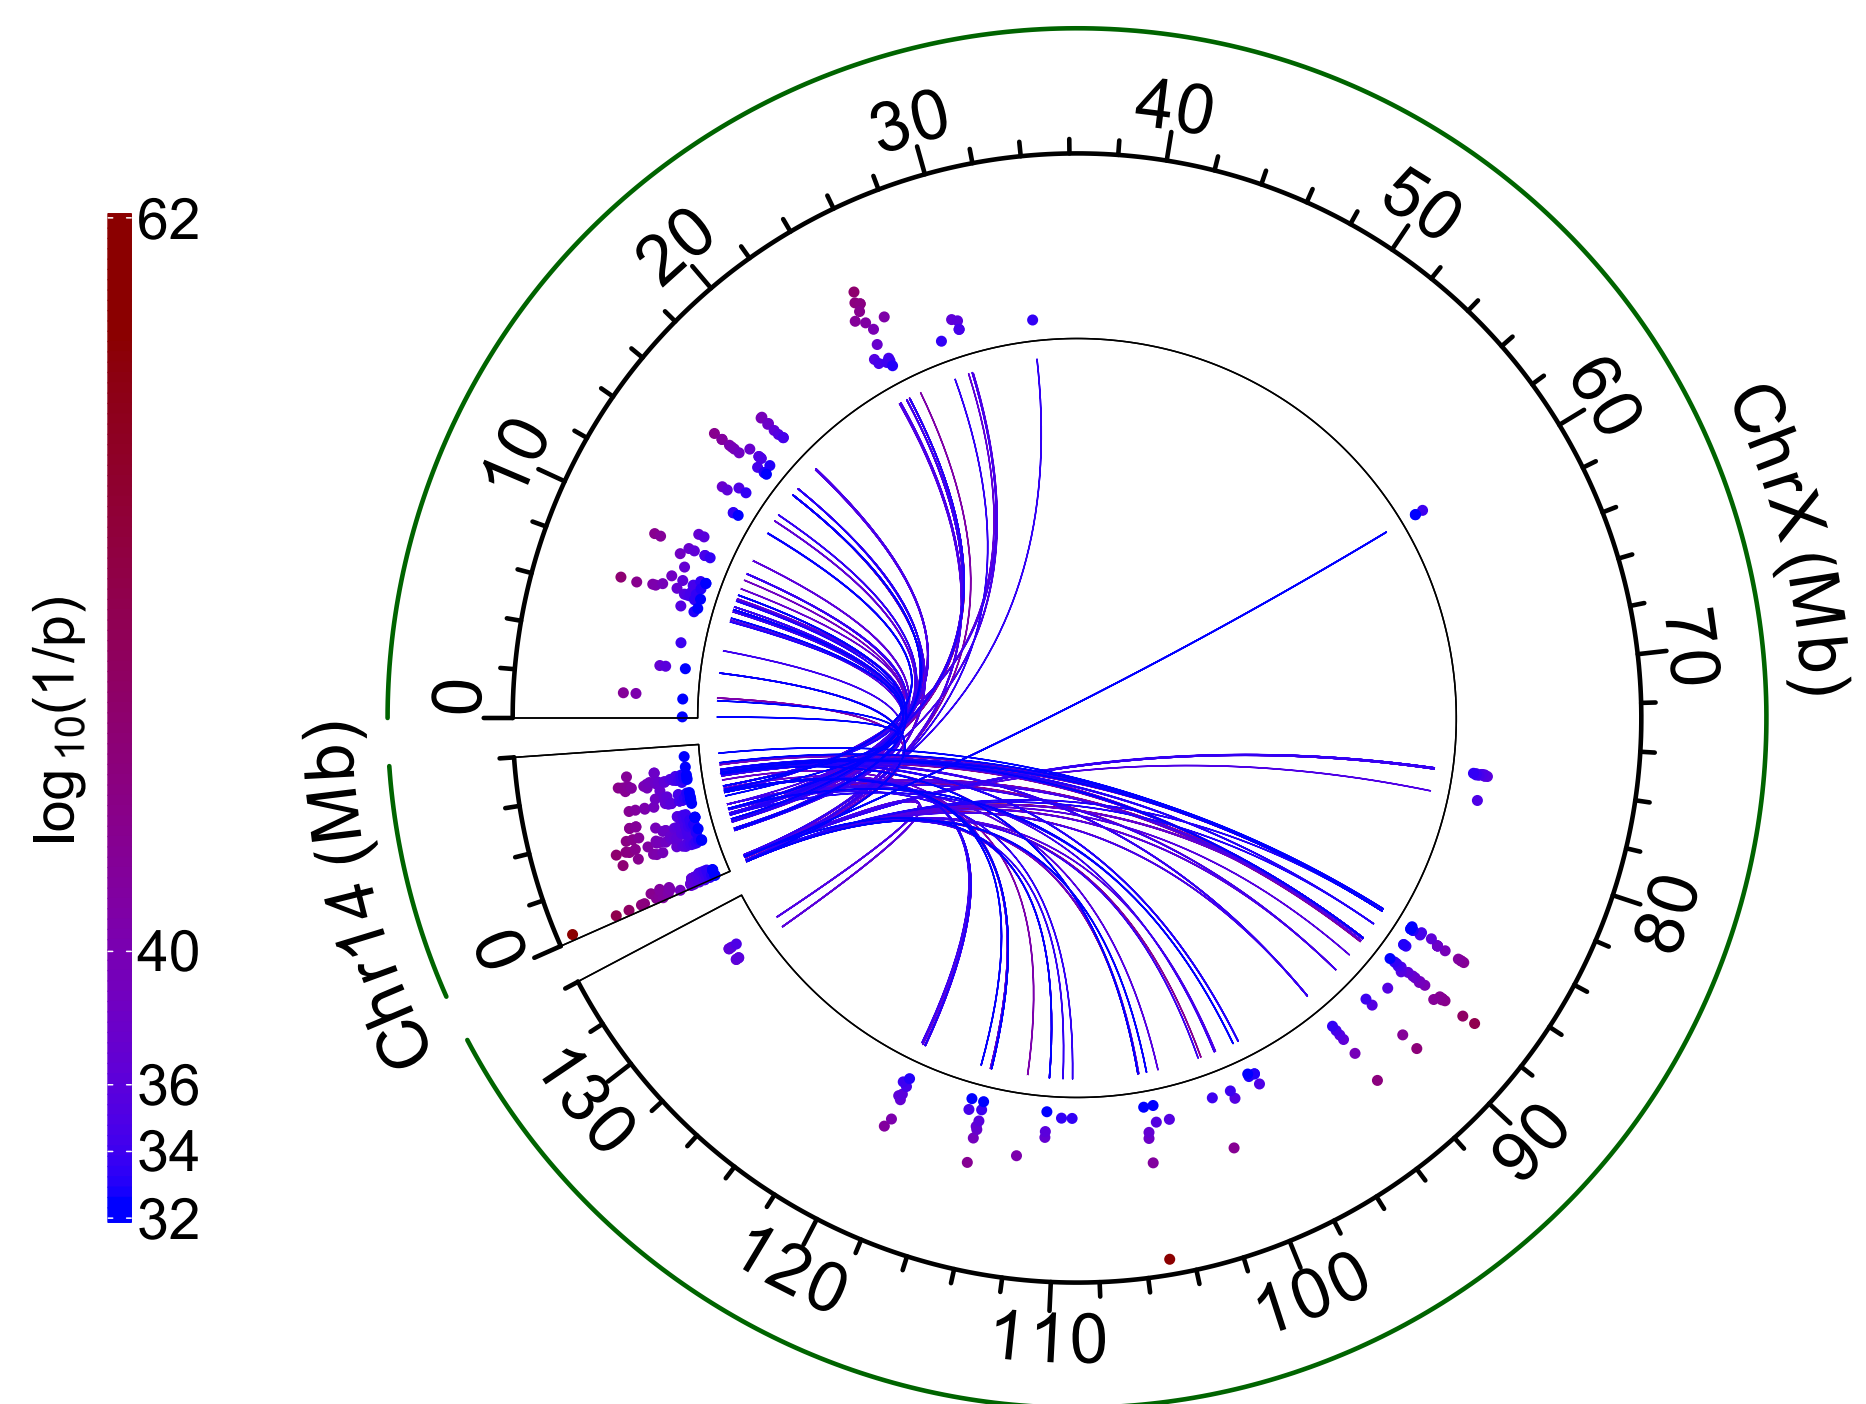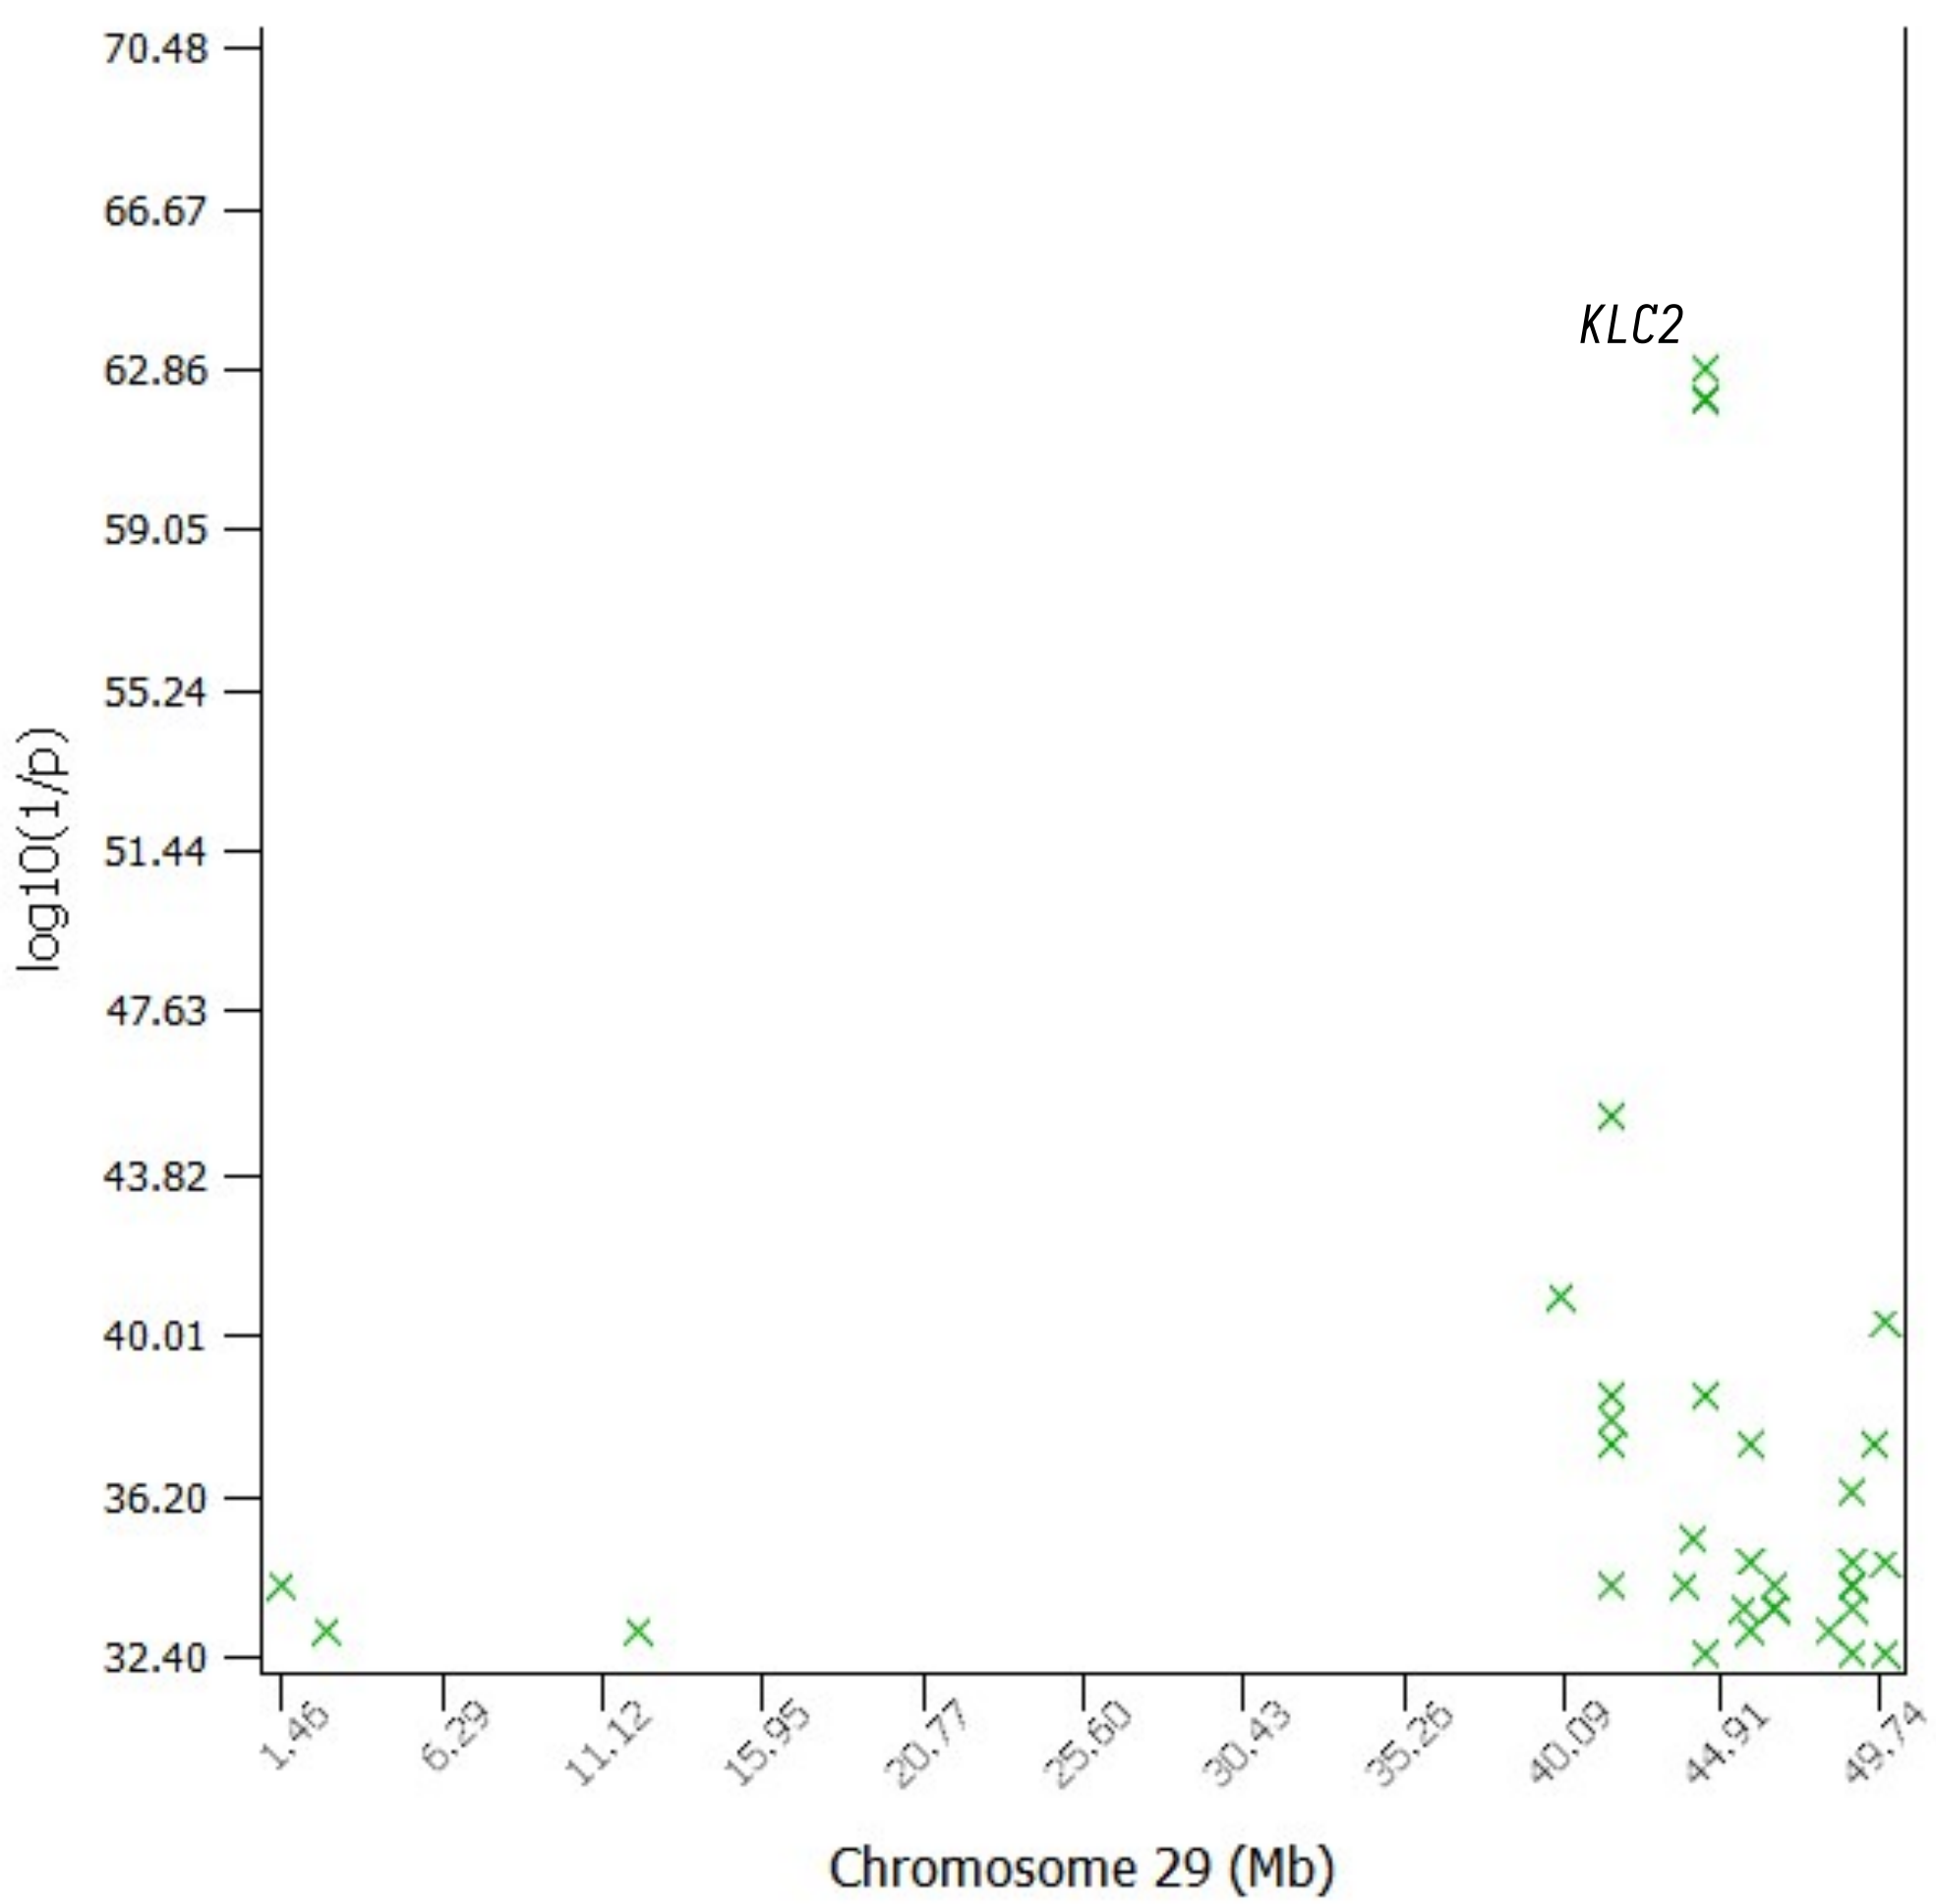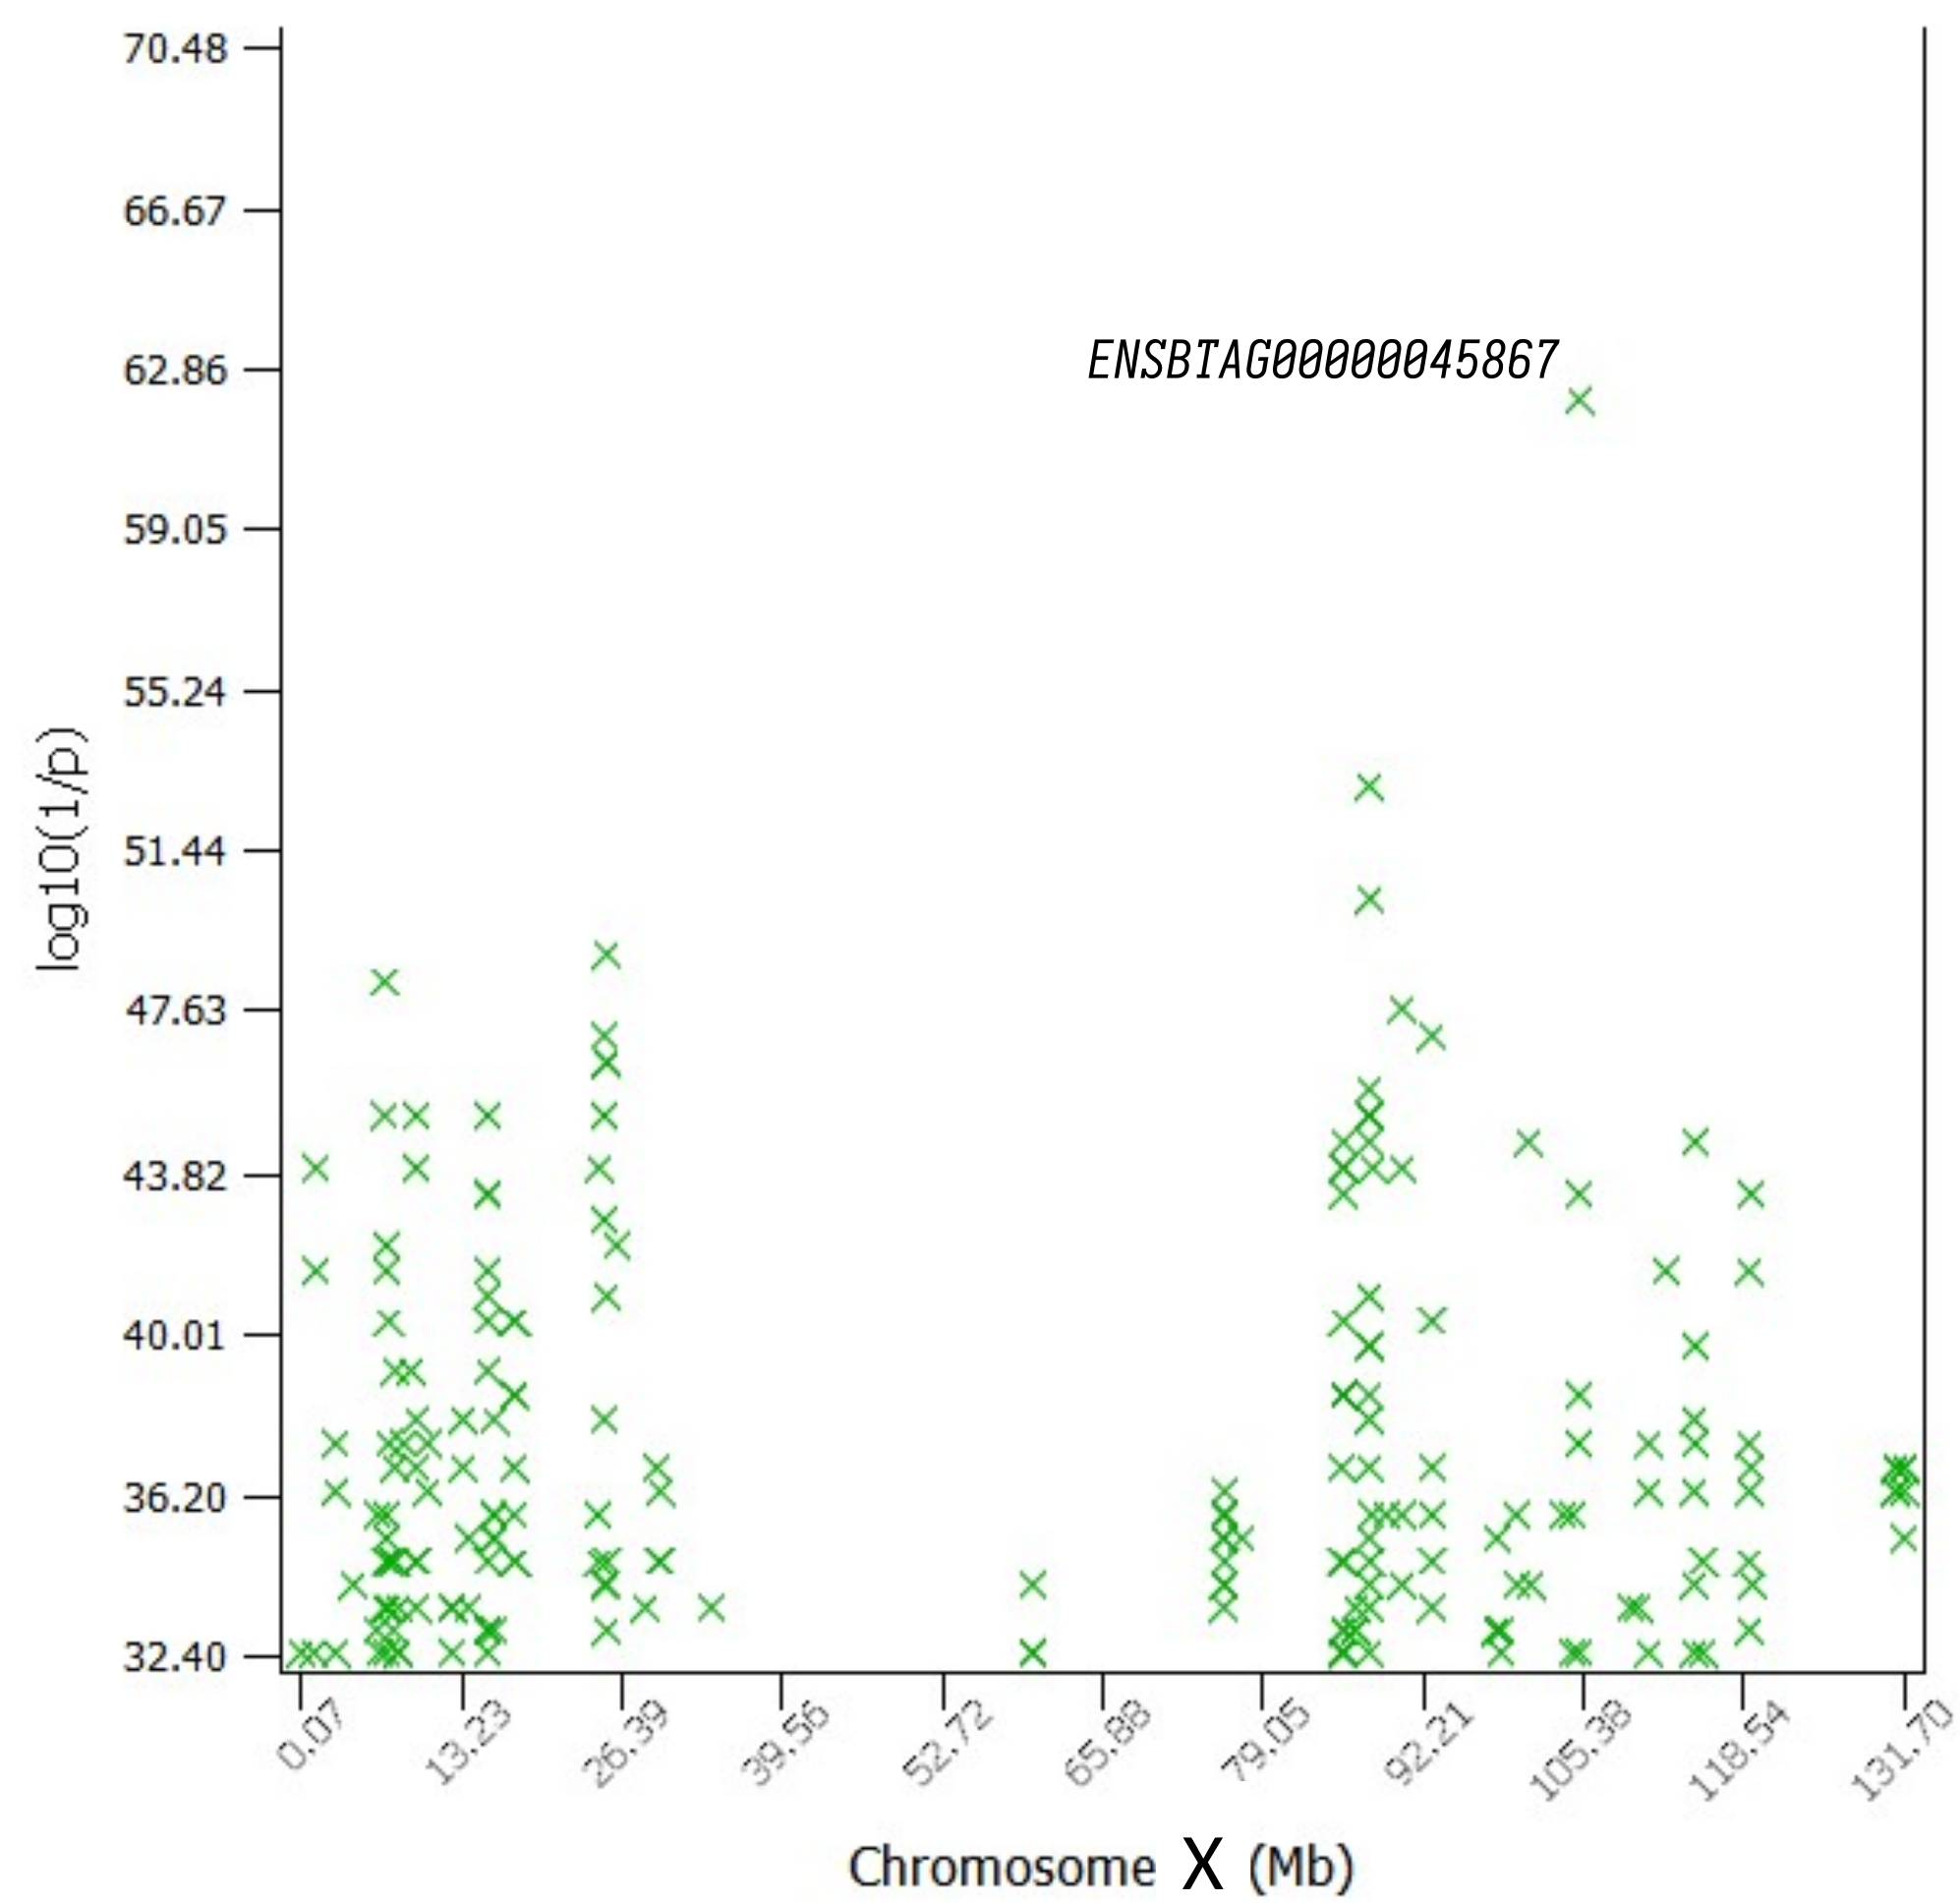

Supplement: s1 [file s1]
